# Supplementary material for: Synthesis of 1,3,5-trisubstituted pyrazolines via Zn(ii)-catalyzed double hydroamination of enynes with aryl hydrazines
Source: Royal Society of Chemistry journal article supplement (doi:10.1039/c1cc14850h), 2011-01-01

## Electronic Supplementary Information

# Synthesis of 1,3,5-Trisubstituted Pyrazolines via Zn(II)-Catalyzed Double Hydroamination of Enynes with Aryl Hydrazines

Nitin T. Patil\* and Vipender Singh

Organic Chemistry Division – II, Indian Institute of Chemical Technology, Hyderabad - 500 607

Email: nitin@iict.res.in; patilnitint@yahoo.com

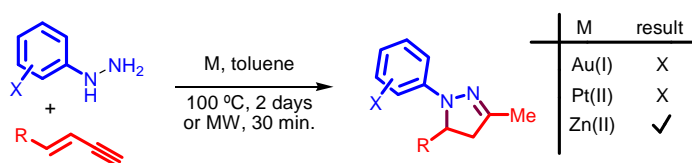

|                                                                         |    |
|-------------------------------------------------------------------------|----|
| 1. General Information .....                                            | 2  |
| 2. Synthesis and Characterization of Starting Materials .....           | 3  |
| 2.1. Preparation of Aryl Hydrazines.....                                | 3  |
| 2.2. Preparation of Enynes .....                                        | 3  |
| 3. General Procedure and Characterization Data for Pyrazolines .....    | 9  |
| 4. General Procedure for Aromatization of Pyrazolines to Pyrazoles..... | 21 |
| 5. <sup>1</sup> H NMR and <sup>13</sup> C NMR Spectra of Compounds..... | 23 |

## 1. General Information

All reactions were carried out in oven or flame dried flasks and vials with magnetic stirring under nitrogen atmosphere. The microwave reactions were carried out in a microwave reactor (Biotage, initiator 8, single-mode reactor). Dried solvents and liquid reagents were transferred by oven-dried syringes or hypodermic syringe cooled to ambient temperature in a desiccators. The chemicals such as phenyl hydrazine (**1a**), cinnamaldehyde (**I**) and 1-ethynylcyclohexene (**4**) and metal catalysts such as AuCl, Ph<sub>3</sub>PAuCl, Ph<sub>3</sub>AuNTf<sub>2</sub>, AgOTf, PtCl<sub>2</sub>, PtI<sub>2</sub>, PtCl<sub>4</sub>, ZnCl<sub>2</sub>, ZnI<sub>2</sub> and Zn(OTf)<sub>2</sub> were commercially available and used as received. All experiments were monitored by analytical thin layer chromatography (TLC). TLC was performed on pre-coated silica gel aluminium/glass plates. After elution, plate was visualized under UV illumination at 254 nm for UV active materials. Further visualization was achieved by staining with KMnO<sub>4</sub> and charring on a hot plate. Solvents were removed in vacuum with a water bath at 35 °C. Silica gel finer than 200 mesh was used for flash column chromatography. Columns were packed with slurry of silica gel in hexane and equilibrated with the appropriate solvent/solvent mixture prior to use. The compounds were loaded neat or as a concentrated solution using the appropriate solvent system. The elution was assisted by applying pressure with an air pump. Yields refer to chromatographically and spectroscopically homogeneous materials unless otherwise stated.

Melting points are uncorrected. IR spectra were recorded as neat liquids or KBr pellets and absorptions are reported in cm<sup>-1</sup>. <sup>1</sup>H NMR spectra were recorded on 300 and 500 MHz spectrometers in appropriate solvents (CDCl<sub>3</sub>/DMSO-d<sub>6</sub>) using TMS as internal standard or the solvent signals as secondary standards and the chemical shifts are shown in δ scales. Multiplicities of NMR signals are designated as s (singlet), d (doublet), t (triplet), q (quartet), m (multiplet, for unresolved lines), etc. <sup>13</sup>C NMR spectra were recorded on 75 MHz spectrometer. High-resolution mass spectra were obtained by using ESI-QTOF mass spectrometry

## 2. Synthesis and Characterization of Starting Materials

### 2.1. Preparation of Aryl Hydrazines

Aryl hydrazines **1b**, **1c**, **1d**, **1e**, **1f**, **1g**, **1h**, **1i**, **1j**, **1k**, **1l** and **1m** were prepared by literature known procedure.<sup>1</sup>

### 2.2. Preparation of Enynes

Aromatic enynes **2a-i** were synthesized from corresponding cinnamaldehydes adopting literature known procedures.<sup>2</sup> The aliphatic enynes **2j**<sup>3</sup> and **2k**<sup>4</sup> were synthesized by literature known methods.

#### General Procedure for the Preparation of Cinnamaldehydes II-IX<sup>5</sup>

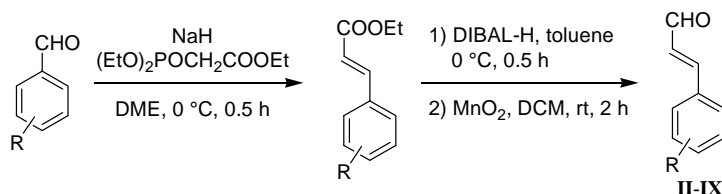

Triethyl phosphonoacetate (2 equiv.) was added drop wise to a stirred suspension of sodium hydride [55% mineral oil dispersion (2 equiv.), washed with hexane] in DME (5 mL) at 0 °C. After the solution was stirred for 15 min at 0 °C, benzaldehyde was added and stirred at same temperature for 30 min. After the completion of reaction, as indicated by TLC, the reaction mixture was diluted with EtOAc and water. The aqueous layer was extracted twice with EtOAc. The combined organic layers were dried over Na<sub>2</sub>SO<sub>4</sub>, concentrated under vacuum and the crude product was purified by column chromatography using hexane/EtOAc as eluent to afford (*E*)-ethylcinnamate. The obtained cinnamate, thus obtained, was reduced to cinnamyl alcohol by following the procedure described below.

A solution of DIBAL-H (1M in toluene, 2 equiv.) was added drop wise to a stirred solution of (*E*)-ethylcinnamate in toluene at 0 °C. After the completion of reaction as indicated by TLC the reaction mixture was diluted with EtOAc and water. The aqueous layer was extracted twice with

<sup>1</sup> A.-R. Lee, W.-H. Huang, T.-L. Lin, K.-M. Shih, H.-F. Lee, *J. Heterocycl. Chem.*, 1995, **32**, 1-11.

<sup>2</sup> P. Michel, D. Gennet, A. Rassat, *Tetrahedron Lett.*, 1999, **40**, 8575-8578.

<sup>3</sup> M. A. Tius, H. Hu, J. K. Kawakami, J. Busch-Peterson, *J. Org. Chem.*, 1998, **63**, 5971-5976.

<sup>4</sup> I. E. Markó, T. Giard, S. Sumida, A.-E. Gies, *Tetrahedron Lett.*, 2002, **43**, 2317-2320.

<sup>5</sup> S. Oida, Y. Tajima, T. Konosu, Y. Nakamura, A. Somada, T. Tanaka, S. Habuki, T. Harasaki, Y. Kamai, T. Fukuoka, S. Ohya, H. Yasuda, *Chem. Pharm. Bull.*, 2000, **48**, 694-707.

EtOAc. The combined organic layers were dried over Na<sub>2</sub>SO<sub>4</sub>, concentrated under vacuum and the crude product was purified by column chromatography using hexane/EtOAc as eluent to afford (*E*)-ethylcinnamyl alcohol. The alcohol was oxidized to (*E*)-cinnamaldehyde according to the procedure described below.

Activated MnO<sub>2</sub> (10 equiv.) was added to the solution of (*E*)-cinnamyl alcohol in DCM (5 mL) and stirred at room temperature for 2 h. Upon completion of reaction, the suspension was filtered through celite and the filtrate was concentrated. The crude product was purified by column chromatography using hexane/EtOAc as eluent to afford (*E*)-cinnamaldehyde.

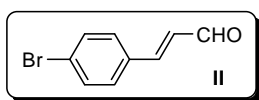

**(*E*)-4-Bromocinnamaldehyde (II):**<sup>6</sup> solid; M.p. 78–80 °C (ref. M.p. 78–79 °C); overall yield 65%; *R*<sub>f</sub> = 0.61 (hexane/EtOAc = 95/05); <sup>1</sup>H NMR (CDCl<sub>3</sub>, 300 MHz): δ 9.68 (d, *J* = 7.5 Hz, 1H), 7.56 (d, *J* = 8.5 Hz, 2H), 7.43–7.34 (m, 3H), 6.68 (dd, *J* = 16.1, 7.5 Hz, 1H); <sup>13</sup>C NMR (CDCl<sub>3</sub>, 75 MHz): δ 193.2, 150.9, 132.8, 132.3, 129.7, 128.9, 125.6.

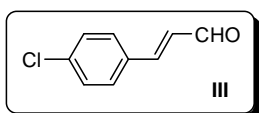

**(*E*)-4-Chlorocinnamaldehyde (III):**<sup>7</sup> solid; M.p. 59–61 °C (ref. M.p. 59–60 °C); overall yield 70%; *R*<sub>f</sub> = 0.65 (hexane/EtOAc = 95/05); <sup>1</sup>H NMR (CDCl<sub>3</sub>, 500 MHz): δ 9.68 (d, *J* = 7.9 Hz, 1H), 7.48 (d, *J* = 8.9 Hz, 2H), 7.40–7.36 (m, 3H), 6.65 (dd, *J* = 16.8, 7.9 Hz, 1H); <sup>13</sup>C NMR (CDCl<sub>3</sub>, 75 MHz): δ 193.2, 150.9, 137.2, 132.5, 129.5, 129.4, 128.9.

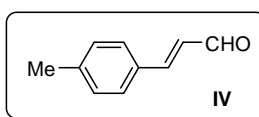

**(*E*)-4-Methylcinnamaldehyde (IV):**<sup>7</sup> solid; M.p. 43–45 °C (ref. M.p. 45–47 °C); overall yield 58%; *R*<sub>f</sub> = 0.70 (hexane/EtOAc = 95/05); <sup>1</sup>H NMR (CDCl<sub>3</sub>, 300 MHz): δ 9.65 (d, *J* = 7.5 Hz,

<sup>6</sup> O. V. Maltsev, A. S. Kucherenko, I. P. Beletskaya, V. A. Tartakovskiy, S. G. Zlotin, *Eur. J. Org. Chem.*, 2010, 2927–2933.

<sup>7</sup> J. Li, J. Zhu, H. Jiang, W. Wang, J. Li, *Chem. Commun.*, 2010, 415–417.

1H), 7.44-7.36 (m, 3H), 7.29 (d,  $J = 7.5$  Hz, 2H), 6.32 (dd,  $J = 15.8, 7.5$  Hz, 1H), 2.39 (s, 3H);  $^{13}\text{C}$  NMR ( $\text{CDCl}_3$ , 75 MHz):  $\delta$  193.8, 152.9, 141.9, 131.3, 129.8, 128.5, 127.7, 21.6.

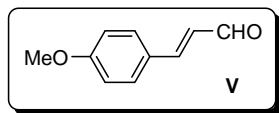

**(E)-4-Methoxycinnamaldehyde (V):**<sup>8</sup> solid; M.p. 63–65 °C (ref. M.p. 58.5–59.8 °C); overall yield 72%;  $R_f = 0.58$  (hexane/EtOAc = 95/05);  $^1\text{H}$  NMR ( $\text{CDCl}_3$ , 300 MHz):  $\delta$  9.59 (d,  $J = 7.55$  Hz, 1H), 7.48-7.45 (m, 2H), 7.32 (d,  $J = 1.51$  Hz, 1H), 6.90-6.86 (m, 2H), 6.54 (dd,  $J = 15.8, 7.5$  Hz, 1H), 3.83 (s, 3H);  $^{13}\text{C}$  NMR ( $\text{CDCl}_3$ , 75 MHz):  $\delta$  193.6, 162.2, 152.7, 152.6, 130.4, 126.4, 114.6, 55.5.

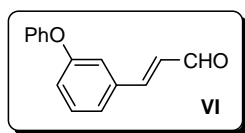

**(E)-3-Phenoxybenzaldehyde (VI):** solid; M.p. 55–57 °C; overall yield 63%;  $R_f = 0.66$  (hexane/EtOAc = 95/05);  $^1\text{H}$  NMR ( $\text{CDCl}_3$ , 500 MHz):  $\delta$  9.65 (d,  $J = 7.5$  Hz, 1H), 7.39-7.24 (m, 4H), 7.26-7.24 (m, 1H), 7.14-7.09 (m, 2H), 7.06-6.98 (m, 3H), 6.62 (dd,  $J = 15.6, 7.5$  Hz, 1H);  $^{13}\text{C}$  NMR ( $\text{CDCl}_3$ , 75 MHz):  $\delta$  193.5, 158.1, 156.3, 151.9, 135.7, 130.4, 129.9, 129.1, 123.9, 123.1, 121.2, 119.2, 117.7; IR (KBr):  $\nu_{\text{max}}$  3292, 3058, 1670, 1480, 1233, 822, 753, 692; HRMS calcd for  $\text{C}_{15}\text{H}_{12}\text{O}_2\text{Na}$  ( $\text{M}^+ + \text{Na}$ ) 247.0734, found 247.0736.

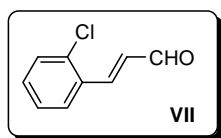

**(E)-2-Chlorocinnamaldehyde (VII):**<sup>7</sup> solid; M.p. 52–54 °C (ref. M.p. 49–51 °C); overall yield 55%;  $R_f = 0.56$  (hexane/EtOAc = 95/05);  $^1\text{H}$  NMR ( $\text{CDCl}_3$ , 300 MHz):  $\delta$  9.75 (d,  $J = 7.5$  Hz, 1H), 7.90 (d,  $J = 16.1$  Hz, 7.4, 1H), 7.66 (dd,  $J = 7.2, 1.5$  Hz, 1H), 7.45 (d,  $J = 8.1$  Hz, 1H), 7.38-7.25 (m, 2H), 6.67 (dd,  $J = 16.1, 7.5$  Hz, 1H);  $^{13}\text{C}$  NMR ( $\text{CDCl}_3$ , 75 MHz):  $\delta$  193.4, 147.8, 135.0, 131.8, 130.3, 130.2, 127.7, 127.2.

<sup>8</sup> E. Artuso, M. Barbero, I. Degani, S. Dughera, R. Fochi, *Tetrahedron*, 2006, **62**, 3146-3157.

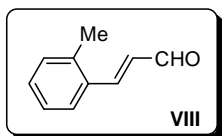

**(E)-2-Methylcinnamaldehyde (VIII):**<sup>7</sup> thick liquid; overall yield 68%;  $R_f = 0.65$  (hexane/EtOAc = 95/05);  $^1\text{H NMR}$  ( $\text{CDCl}_3$ , 300 MHz):  $\delta$  9.70 (d,  $J = 7.5$  Hz, 1H), 7.73 (d,  $J = 15.8$  Hz, 1H), 7.32-7.17 (m, 4H), 6.61 (dd,  $J = 15.8, 7.5$  Hz, 1H), 2.06 (s, 3H);  $^{13}\text{C NMR}$  ( $\text{CDCl}_3$ , 75 MHz):  $\delta$  193.9, 150.4, 144.7, 137.9, 131.0, 126.6, 118.1, 19.7.

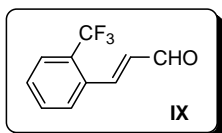

**(E)-2-Trifluoromethylcinnamaldehyde (IX):**<sup>9</sup> solid; M.p. 43–45 °C (ref. M.p. 37–39 °C); overall yield 40%;  $R_f = 52$  (hexane/EtOAc = 90/10);  $^1\text{H NMR}$  ( $\text{CDCl}_3$ , 300 MHz):  $\delta$  9.73 (d,  $J = 7.5$  Hz, 1H), 8.12-8.09 (m, 1H), 7.99-7.96 (m, 2H), 7.94-7.91 (m, 2H), 6.72 (dd,  $J = 15.5, 7.5$  Hz, 1H);  $^{13}\text{C NMR}$  ( $\text{DMSO-d}_6$ , 75 MHz):  $\delta$  194.6, 166.9, 138.2, 134.3, 132.9, 132.4, 130.2, 128.4, 125.9, 123.8.

#### General Procedure for the Preparation of Enynes 2a-i

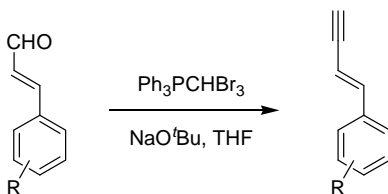

Under nitrogen atmosphere dibromomethyltriphenylphosphoniumbromide (2 equiv.) was added to the stirred suspension of  $\text{NaO}^t\text{Bu}$  (1.9 equiv.) in THF (10 mL). The solution was stirred for 20 minutes then cinnamaldehyde was added. After 30 min, the solution was cooled to  $-78$  °C and  $\text{NaO}^t\text{Bu}$  (5 equiv.) was added. After 2 h the reaction mixture was quenched with saturated brine and extracted twice with ethyl acetate. The combined organic layers were dried over  $\text{Na}_2\text{SO}_4$ , concentrated under vacuum and the crude product was purified by column chromatography using hexane/EtOAc as eluent to afford enyne.

<sup>9</sup> A. Nudelman, Y. Binnes, N. Shmueli-Broide, Y. Odessa, J. P. Hieble, A. C. Sulpizio, *Arch. Pharm. Pharm. Med. Chem.*, 1996, **329**, 125-132.

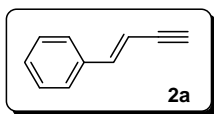

**(E)-1-(But-1-en-3-ynyl)benzene (2a):**<sup>10</sup> thick liquid; 60% yield.  $R_f = 0.76$  (hexane/EtOAc = 95/05);  $^1\text{H NMR}$  ( $\text{CDCl}_3$ , 300 MHz):  $\delta$  7.38-7.21 (m, 5H), 6.98 (d,  $J = 16.2$  Hz, 1H), 6.17 (dd,  $J = 16.4, 2.2$  Hz, 1H), 2.96 (d,  $J = 2.2$  Hz, 1H);  $^{13}\text{C NMR}$  ( $\text{CDCl}_3$ , 75 MHz):  $\delta$  143.2, 135.8, 132.8, 128.9, 128.7, 127.6, 126.4, 107.0, 82.9, 79.3.

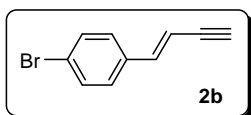

**(E)-1-(But-1-en-3-ynyl)-4-bromobenzene (2b):**<sup>11</sup> thick liquid; yield 63%;  $R_f = 0.62$  (hexane/EtOAc = 95/05);  $^1\text{H NMR}$  ( $\text{CDCl}_3$ , 300 MHz):  $\delta$  7.43 (d,  $J = 8.5$  Hz, 2H), 7.22 (d,  $J = 8.5$  Hz, 2H), 6.93 (d,  $J = 16.2$  Hz, 1H), 6.09 (dd,  $J = 16.2, 2.2$  Hz, 1H), 2.99 (d,  $J = 2.2$  Hz, 1H);  $^{13}\text{C NMR}$  ( $\text{CDCl}_3$ , 75 MHz):  $\delta$  141.7, 134.7, 131.8, 127.7, 122.8, 107.7, 82.5, 79.8.

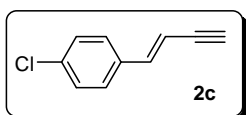

**(E)-1-(But-1-en-3-ynyl)-4-chlorobenzene (2c):**<sup>12</sup> solid; M.p. 55–57 °C (ref. M.p. 51–53 °C); yield 65%;  $R_f = 0.78$  (hexane/EtOAc = 95/05);  $^1\text{H NMR}$  ( $\text{CDCl}_3$ , 300 MHz):  $\delta$  7.35-7.25 (m, 4H), 6.94 (d,  $J = 16.2$  Hz, 1H), 6.06 (dd,  $J = 16.2, 2.3$  Hz, 1H), 2.98 (d,  $J = 2.2$  Hz, 1H);  $^{13}\text{C NMR}$  ( $\text{CDCl}_3$ , 75 MHz):  $\delta$  141.6, 134.6, 134.2, 128.9, 127.4, 107.6, 82.5, 79.8.

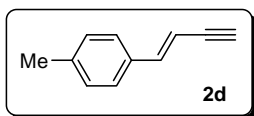

<sup>10</sup> B. J. Albert, A. Sivaramakrishnan, T. Naka, N. L. Czaicki, K. Koide, *J. Am. Chem. Soc.*, 2007, **129**, 2648-2659.

<sup>11</sup> K. Tohdo, Y. Hamada, T. Shioiri, *Tetrahedron Lett.*, 1992, **33**, 2031-2034.

<sup>12</sup> E. N. Marvell, G. Caple, C. Delphey, J. Platt, N. Polston, J. Tashiro, *Tetrahedron*, 1973, **29**, 3797-3806.

**(E)-1-(But-1-en-3-ynyl)-4-methylbenzene (2d):**<sup>13</sup> thick liquid; yield 55%;  $R_f = 0.75$  (hexane/EtOAc = 95/05); <sup>1</sup>H NMR (CDCl<sub>3</sub>, 300 MHz): δ 7.27-7.23 (m, 2H), 7.09 (d,  $J = 8.3$  Hz, 2H), 6.97 (d,  $J = 15.8$  Hz, 1H), 6.04 (dd,  $J = 15.8, 2.2$  Hz, 1H), 2.94 (d,  $J = 2.2$  Hz, 1H), 2.34 (s, 3H); <sup>13</sup>C NMR (CDCl<sub>3</sub>, 75 MHz): δ 143.0, 138.9, 133.1, 131.4, 129.4, 126.2, 105.8, 83.1, 78.8, 21.3.

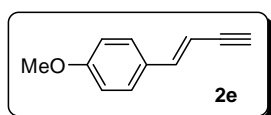

**(E)-1-(But-1-en-3-ynyl)-4-methoxybenzene (2e):**<sup>13</sup> solid; M.p. 45–47 °C (ref. M.p. 45–47); yield 67%;  $R_f = 0.75$  (hexane/EtOAc = 90/10); <sup>1</sup>H NMR (CDCl<sub>3</sub>, 500 MHz): δ 7.31-7.25 (m, 2H), 6.94 (d,  $J = 16.6$  Hz, 1H), 6.80 (d,  $J = 9.1$  Hz, 2H), 5.93 (dd,  $J = 16.6, 2.2$  Hz, 1H), 3.79 (s, 3H), 2.90 (d,  $J = 2.2$  Hz, 1H); <sup>13</sup>C NMR (CDCl<sub>3</sub>, 75 MHz): δ 142.7, 127.7, 126.5, 114.1, 104.5, 78.4, 55.3.

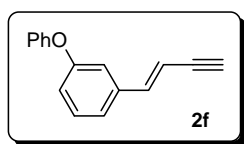

**(E)-1-(But-1-en-3-ynyl)-3-phenoxybenzene (2f):** thick liquid; yield 55%;  $R_f = 0.73$  (hexane/EtOAc = 95/05); <sup>1</sup>H NMR (CDCl<sub>3</sub>, 300 MHz): δ 7.34-7.29 (m, 3H), 7.26-7.23 (m, 1H), 7.11-7.06 (m, 2H), 6.99-6.97 (m, 3H), 6.92 (s, 1H), 6.05 (dd,  $J = 16.6, 2.2$  Hz, 1H), 2.98 (d,  $J = 2.2$  Hz, 1H); <sup>13</sup>C NMR (CDCl<sub>3</sub>, 75 MHz): δ 157.7, 156.8, 142.4, 137.6, 129.9, 129.7, 123.5, 121.3, 119.2, 118.9, 116.2, 107.8, 82.6, 79.6; IR (film):  $\nu_{max}$  3291, 3038, 2923, 1695, 1575, 1487, 1378, 1241, 1072, 954, 769, 691; HRMS calcd for C<sub>16</sub>H<sub>13</sub>O (M<sup>+</sup> + H) 221.1123, found 221.1127.

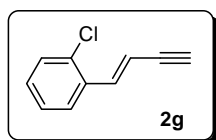

<sup>13</sup> A. W. Gibson, G. R. Humphrey, D. J. Kennedy, S. H. B. Stanley, *Synthesis*, 1991, 414-416.



**(E)-1-(But-1-en-3-ynyl)-2-chlorobenzene (2g):** thick liquid; yield 59%;  $R_f = 0.70$  (hexane/EtOAc = 95/05);  $^1\text{H NMR}$  ( $\text{CDCl}_3$ , 500 MHz):  $\delta$  7.51-7.47 (m, 1H), 7.37-7.31 (m, 2H), 7.24-7.15 (m, 2H), 6.08 (dd,  $J = 16.6, 2.2$  Hz, 1H), 3.02 (d,  $J = 2.2$  Hz, 1H);  $^{13}\text{C NMR}$  ( $\text{CDCl}_3$ , 75 MHz):  $\delta$  139.0, 129.9, 129.7, 129.2, 128.5, 126.9, 126.2, 109.6, 82.6, 80.1; IR (film):  $\nu_{\text{max}}$  3240, 2948, 2835, 1656, 1454, 1113, 1032, 750; HRMS calcd for  $\text{C}_{10}\text{H}_8\text{Cl}$  ( $\text{M}^+ + \text{H}$ ) 163.0287, found 163.0285.

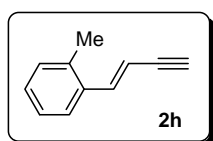

**(E)-1-(But-1-en-3-ynyl)-2-methylbenzene (2h):**<sup>14</sup> solid; M.p. 37–39 °C (ref. M.p. 49–42 °C); yield 52%;  $R_f = 0.76$  (hexane/EtOAc = 95/05);  $^1\text{H NMR}$  ( $\text{CDCl}_3$ , 300 MHz):  $\delta$  7.42-7.37 (m, 1H), 7.24 (d,  $J = 16.2$  Hz, 1H), 7.16-7.09 (m 3H), 6.01 (dd,  $J = 16.2, 2.1$  Hz, 1H), 2.95 (d,  $J = 2.1$  Hz, 1H), 2.37 (s, 3H);  $^{13}\text{C NMR}$  ( $\text{CDCl}_3$ , 75 MHz):  $\delta$  140.9, 130.6, 128.8, 127.5, 126.3, 125.1, 108.1, 83.3, 78.9, 19.7.

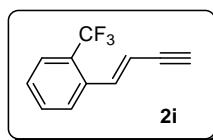

**(E)-1-(But-1-en-3-ynyl)-2-trifluoromethylbenzene (2i):** thick liquid; yield 30%;  $R_f = 0.43$  (hexane/EtOAc = 70/30);  $^1\text{H NMR}$  ( $\text{CDCl}_3$ , 300 MHz):  $\delta$  7.66-7.60 (m, 2H), 7.52-7.45 (m, 1H), 7.40-7.30 (m, 2H), 6.09 (dd,  $J = 16.1, 2.1$  Hz, 1H), 3.04 (d,  $J = 2.1$  Hz, 1H);  $^{13}\text{C NMR}$  ( $\text{DMSO-d}_6$ , 75 MHz):  $\delta$  134.1, 132.8, 131.4, 128.7, 127.1, 125.8, 122.0, 113.0, 88.5, 66.9; IR (film):  $\nu_{\text{max}}$  3028, 2917, 1597, 1499, 1355, 1097, 872, 752, 659; HRMS calcd for  $\text{C}_{11}\text{H}_8\text{F}_3$  ( $\text{M}^+ + \text{H}$ ) 197.0573, found 197.0576.

### 3. General Procedure and Characterization Data for Pyrazolines

A solution of enyne (0.391 mmol), aryl hydrazine (1.172 mmol) and  $\text{Zn}(\text{OTf})_2$  (3 equiv.) in toluene (2 mL) was sealed under nitrogen in reaction vials and irradiated in a microwave reactor (Biotage, initiator 8, single-mode reactor) at 150 °C for 1 h. On cooling of the reaction mixture

<sup>14</sup> G. Okusa, M. Kumagai, T. Itai, *Chem. Pharm. Bull.*, 1969, **17**, 2502-2506.

to ambient temperature the solvent was removed under reduced pressure and the residue was purified by column chromatography using hexane/EtOAc as eluent to afford pyrrazoline.

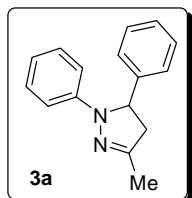

**3-Methyl-1,5-diphenyl-4,5-dihydro-1H-pyrazole (3a):**<sup>15</sup> thick liquid; yield 76%;  $R_f = 0.63$  (hexane/EtOAc = 90/10);  $^1\text{H NMR}$  ( $\text{CDCl}_3$ , 300 MHz):  $\delta$  7.32-7.18 (m, 5H), 7.06 (t,  $J = 7.5$  Hz, 2H), 6.83 (d,  $J = 9.1$  Hz, 1H), 6.67 (t,  $J = 7.5$  Hz, 1H), 4.97 (dd,  $J = 12.1, 8.3$  Hz, 1H), 3.38 (dd,  $J = 17.4, 12.1$  Hz, 1H), 2.68 (dd,  $J = 17.4, 8.3$  Hz, 1H), 2.05 (s, 3H);  $^{13}\text{C NMR}$  ( $\text{CDCl}_3$ , 75 MHz):  $\delta$  148.5, 146.1, 143.0, 129.1, 128.9, 127.4, 125.9, 118.6, 113.1, 107.8, 64.7, 47.8, 15.9; IR (film):  $\nu_{\text{max}}$  3146, 2925, 1597, 1504, 1365, 1010, 764, 695; HRMS calcd for  $\text{C}_{16}\text{H}_{17}\text{N}_2$  ( $\text{M}^+ + \text{H}$ ) 237.1391, found 237.1382.

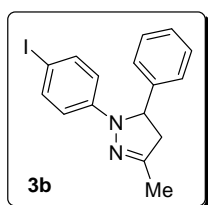

**1-(4-Iodophenyl)-3-methyl-5-phenyl-4,5-dihydro-1H-pyrazole (3b):** thick liquid; yield 74%;  $R_f = 0.61$  (hexane/EtOAc = 90/10);  $^1\text{H NMR}$  ( $\text{CDCl}_3$ , 300 MHz):  $\delta$  7.29-7.15 (m, 4H), 7.06 (t,  $J = 7.2$  Hz, 2H), 6.84 (d,  $J = 7.7$  Hz, 2H), 6.67 (t,  $J = 7.3$  Hz, 1H), 4.98 (dd,  $J = 11.9, 8.1$  Hz, 1H), 3.38 (dd,  $J = 17.4, 11.9$  Hz, 1H), 2.69 (dd,  $J = 17.4, 8.1$  Hz, 1H), 2.06 (s, 3H);  $^{13}\text{C NMR}$  ( $\text{CDCl}_3$ , 75 MHz):  $\delta$  129.0, 128.8, 128.6, 127.3, 125.9, 125.1, 118.6, 113.1, 64.7, 47.8, 15.9; IR (film):  $\nu_{\text{max}}$  3202, 2930, 1510, 1210, 1051, 772; HRMS calcd for  $\text{C}_{16}\text{H}_{16}\text{N}_2\text{I}$  ( $\text{M}^+ + \text{H}$ ) 363.0358, found 363.0361.

<sup>15</sup> X. Zhu, Z. Li, C. Jin, L. Xu, Q. Wu, W. Su, *Green Chem.*, 2009, 163-165.

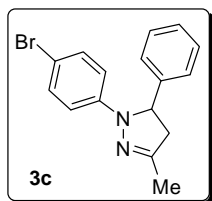

**1-(4-Bromophenyl)-3-methyl-5-phenyl-4,5-dihydro-1H-pyrazole (3c):**<sup>16</sup> thick liquid; yield 76%;  $R_f = 0.66$  (hexane/EtOAc = 90/10);  $^1\text{H NMR}$  ( $\text{CDCl}_3$ , 500 MHz):  $\delta$  7.35-7.12 (m, 7 H), 6.72 (d,  $J = 9.3$  Hz, 2H), 4.96 (dd,  $J = 11.8, 7.6$  Hz, 1H), 3.40 (dd,  $J = 17.8, 11.8$  Hz, 1H), 2.79 (dd,  $J = 17.8, 7.6$  Hz, 1H), 2.05 (s, 3H);  $^{13}\text{C NMR}$  ( $\text{CDCl}_3$ , 75 MHz):  $\delta$  145.9, 144.4, 139.3, 138.6, 138.4, 129.4, 128.7, 128.5, 126.3, 121.4, 120.7, 114.3, 113.8, 82.2, 25.1, 16.0; IR (film):  $\nu_{\text{max}}$  3220, 2924, 1732, 1590, 1402, 1365, 1072, 968, 829; HRMS calcd for  $\text{C}_{16}\text{H}_{16}\text{N}_2\text{Br}$  ( $\text{M}^+ + \text{H}$ ) 315.0494, found 315.0496

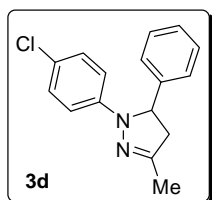

**1-(4-Chlorophenyl)-3-methyl-5-phenyl-4,5-dihydro-1H-pyrazole (3d):** thick liquid; yield 71%;  $R_f = 0.62$  (hexane/EtOAc = 90/10);  $^1\text{H NMR}$  ( $\text{CDCl}_3$ , 500 MHz):  $\delta$  7.33-7.16 (m, 5H), 7.02 (d,  $J = 9.1$  Hz, 2H), 6.77 (d,  $J = 9.1$  Hz, 2H), 4.95 (dd,  $J = 12.1, 8.3$  Hz, 1H), 3.39 (dd,  $J = 17.4, 12.1$  Hz, 1H), 2.70 (dd,  $J = 17.4, 8.3$  Hz, 1H), 2.06 (s, 3H);  $^{13}\text{C NMR}$  ( $\text{CDCl}_3$ , 75 MHz):  $\delta$  148.9, 144.4, 142.4, 129.1, 128.6, 127.5, 125.7, 123.2, 114.1, 64.6, 47.8, 15.8; IR (film):  $\nu_{\text{max}}$  3231, 2924, 1710, 1494, 1093, 831, 758, 696; HRMS calcd for  $\text{C}_{16}\text{H}_{16}\text{N}_2\text{Cl}$  ( $\text{M}^+ + \text{H}$ ) 271.1010, found 271.1001.

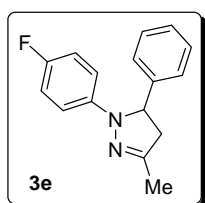

**1-(4-Fluorophenyl)-3-methyl-5-phenyl-4,5-dihydro-1H-pyrazole (3e):** thick liquid; yield 69%;  $R_f = 0.53$  (hexane/EtOAc = 90/10);  $^1\text{H NMR}$  ( $\text{CDCl}_3$ , 300 MHz):  $\delta$  7.21-7.19 (m, 2H),

<sup>16</sup> US2002/156081 A1, 2002

7.17-7.14 (m, 4H), 6.97 (t,  $J = 7.3$  Hz, 2H), 6.77 (d,  $J = 6.5$  Hz, 1H), 4.88 (dd,  $J = 12.2, 8.9$  Hz, 1H), 3.37 (dd  $J = 17.1, 12.2$  Hz, 1H), 2.70 (dd,  $J = 17.1, 8.9$  Hz, 1H), 2.36 (s, 3H);  $^{13}\text{C}$  NMR ( $\text{CDCl}_3$ , 75 MHz):  $\delta$  158.1, 154.9, 148.7, 142.8, 142.6, 129.0, 128.5, 127.5, 126.7, 125.9, 125.6, 116.1, 115.7, 115.3, 115.0, 114.3, 114.2, 104.2, 65.6, 47.9, 15.8; IR (film):  $\nu_{\text{max}}$  3214, 2923, 1620, 1502, 1493, 1370, 1160, 750; HRMS calcd for  $\text{C}_{16}\text{H}_{16}\text{N}_2\text{F}$  ( $\text{M}^+ + \text{H}$ ) 255.1297, found 255.1300.

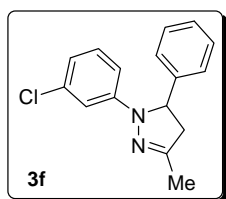

**1-(3-Chlorophenyl)-3-methyl-5-phenyl-4,5-dihydro-1H-pyrazole (3f)**: thick liquid; yield 68%;  $R_f = 0.61$  (hexane/EtOAc = 90/10);  $^1\text{H}$  NMR ( $\text{CDCl}_3$ , 300 MHz):  $\delta$  7.33-7.28 (m, 2H), 7.24-7.20 (m, 3H), 6.97-6.92 (m, 2H), 6.63 (dd,  $J = 7.5, 1.5$  Hz, 1H), 6.56 (dd,  $J = 8.3, 2.6$  Hz, 1H), 4.97 (dd,  $J = 12.1, 7.5$  Hz, 1H), 3.40 (dd,  $J = 17.4, 12.1$  Hz, 1H), 2.69 (dd,  $J = 17.4, 7.5$  Hz, 1H), 2.05 (s, 3H);  $^{13}\text{C}$  NMR ( $\text{CDCl}_3$ , 75 MHz):  $\delta$  149.2, 146.7, 142.3, 134.6, 129.7, 129.1, 127.5, 125.7, 118.2, 113.1, 110.7, 64.3, 47.8, 15.7; IR (film):  $\nu_{\text{max}}$  3072, 2932, 2853, 1713, 1592, 1490, 1439, 1376, 1115, 780; HRMS calcd for  $\text{C}_{16}\text{H}_{16}\text{ClN}_2$  ( $\text{M}^+ + \text{H}$ ) 271.1218, found 271.1215.

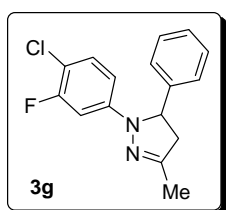

**1-(4-Chloro-3-fluorophenyl)-3-methyl-5-phenyl-4,5-dihydro-1H-pyrazole (3g)**: thick liquid; yield 65%;  $R_f = 0.48$  (hexane/EtOAc = 90/10);  $^1\text{H}$  NMR ( $\text{CDCl}_3$ , 300 MHz):  $\delta$  7.32-7.28 (m, 2H), 7.27-7.21 (m, 3H), 7.01-6.98 (m, 1H), 6.81 (t,  $J = 9.1$  Hz, 1H), 6.65-6.51 (m, 1H), 4.89 (dd,  $J = 11.3, 8.3$  Hz, 1H), 3.38 (dd,  $J = 17.3, 11.3$  Hz, 1H), 2.69 (dd,  $J = 17.3, 8.3$  Hz, 1H), 2.04 (s, 3H);  $^{13}\text{C}$  NMR ( $\text{CDCl}_3$ , 75 MHz):  $\delta$  153.2, 149.5, 142.2, 131.2, 129.2, 127.7, 125.8,

116.4, 116.2, 114.8, 111.9, 65.1, 48.1, 15.8; IR (film):  $\nu_{max}$  3061, 2934, 1742, 1507, 1489, 1363, 1261, 1042, 758; HRMS calcd for  $C_{18}H_{15}N_2ClF$  ( $M^+ + H$ ) 289.0767, found 289.0754.

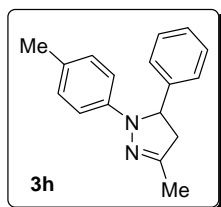

**3-Methyl-5-phenyl-1-p-tolyl-4,5-dihydro-1H-pyrazole (3h):**<sup>17</sup> thick liquid; yield 72%;  $R_f$  = 0.61 (hexane/EtOAc = 90/10);  $^1H$  NMR ( $CDCl_3$ , 300 MHz):  $\delta$  7.31-7.19 (m, 5H), 6.87 (d,  $J$  = 8.1 Hz, 2H), 6.74 (d,  $J$  = 8.1 Hz, 2H), 4.93 (dd,  $J$  = 12.2, 8.9 Hz, 1H), 3.36 (dd,  $J$  = 17.9, 12.2 Hz, 1H), 2.68 (dd,  $J$  = 17.9, 8.9 Hz, 1H), 2.21 (s, 3H), 2.06 (s, 3H);  $^{13}C$  NMR ( $CDCl_3$ , 75 MHz):  $\delta$  148.2, 144.1, 143.1, 129.4, 128.9, 127.3, 125.9, 113.3, 109.8, 107.5, 104.1, 65.3, 47.8, 20.4, 15.9; IR (KBr):  $\nu_{max}$  3052, 2924, 2836, 1605, 1518, 1410, 1350, 1011, 762; HRMS calcd for  $C_{17}H_{19}N_2$  ( $M^+ + H$ ) 251.1407, found 251.1418.

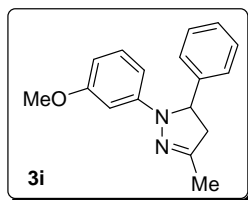

**1-(3-methoxyphenyl)-3-methyl-5-phenyl-4,5-dihydro-1H-pyrazole (3i):** thick liquid; yield 80%;  $R_f$  = 0.61 (hexane/EtOAc = 90/10);  $^1H$  NMR ( $CDCl_3$ , 300 MHz):  $\delta$  7.32-7.20 (m, 5H), 6.93 (t,  $J$  = 8.31 Hz, 1H), 6.52 (d,  $J$  = 2.3 Hz, 1H), 6.35-6.17 (m, 2H), 4.96 (dd,  $J$  = 12.1, 8.3 Hz, 1H), 3.69 (s, 3H), 3.37 (dd,  $J$  = 17.4, 12.1 Hz, 1H), 2.67 (dd,  $J$  = 17.4, 8.3 Hz, 1H), 2.05 (s, 3H);  $^{13}C$  NMR ( $CDCl_3$ , 75 MHz):  $\delta$  160.3, 148.6, 147.3, 143.0, 129.6, 129.0, 127.4, 125.8, 110.8, 105.7, 104.4, 98.9, 64.7, 55.1, 47.8, 15.9; IR (film):  $\nu_{max}$  3062, 2923, 1729, 1587, 1492, 1367, 1236, 886, 757, 691; HRMS calcd for  $C_{17}H_{19}N_2O$  ( $M^+ + H$ ) 267.1356, found 267.1358.

<sup>17</sup> US3013015, 1959

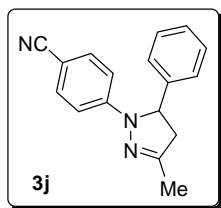

**4-(3-Methyl-5-phenyl-4,5-dihydropyrazol-1-yl)benzonitrile (3j):**<sup>18</sup> thick liquid; yield 62%;  $R_f$  = 0.42 (hexane/EtOAc = 90/10);  $^1\text{H}$  NMR ( $\text{CDCl}_3$ , 300 MHz):  $\delta$  7.35-7.24 (m, 5H), 7.15 (d,  $J$  = 6.8 Hz, 2H), 6.84 (d,  $J$  = 9.1 Hz, 2H), 5.09 (dd,  $J$  = 12.1, 6.1 Hz, 1H), 3.48 (dd,  $J$  = 18.8, 12.1 Hz, 1H), 2.74 (dd,  $J$  = 18.8, 6.1 Hz, 1H), 2.09 (s, 3H);  $^{13}\text{C}$  NMR ( $\text{CDCl}_3$ , 75 MHz):  $\delta$  151.3, 147.4, 141.3, 133.1, 129.2, 127.8, 125.4, 120.3, 112.2, 99.4, 63.1, 47.7, 15.8; IR (film):  $\nu_{\text{max}}$  3135, 2925, 2226, 1605, 1512, 1405, 1200, 890, 753; HRMS calcd for  $\text{C}_{17}\text{H}_{16}\text{N}_3$  ( $\text{M}^+ + \text{H}$ ) 262.1193, found 262.1206.

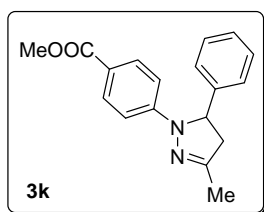

**Methyl 4-(3-methyl-5-phenyl-4,5-dihydropyrazol-1-yl)benzoate (3k):** thick liquid; yield 71%;  $R_f$  = 0.63 (hexane/EtOAc = 90/10);  $^1\text{H}$  NMR ( $\text{CDCl}_3$ , 300 MHz):  $\delta$  7.83 (d,  $J$  = 9.1 Hz, 1H), 7.75 (d,  $J$  = 9.1 Hz, 2H), 7.21-7.11 (m, 4H), 6.81 (d,  $J$  = 8.3 Hz, 2H), 5.11 (dd,  $J$  = 12.1, 6.1 Hz, 1H), 3.80 (s, 3H), 3.45 (dd,  $J$  = 17.4, 12.1 Hz, 1H), 2.72 (dd,  $J$  = 17.4, 6.1 Hz, 1H), 2.08 (s, 3H);  $^{13}\text{C}$  NMR ( $\text{CDCl}_3$ , 75 MHz):  $\delta$  167.3, 150.5, 148.3, 141.9, 131.1, 129.2, 127.7, 125.6, 113.7, 111.6, 63.3, 47.7, 26.3, 15.9; IR (film):  $\nu_{\text{max}}$  3164, 2925, 2872, 1704, 1673, 1615, 1514, 1393, 1141, 925, 809, 715; HRMS calcd for  $\text{C}_{18}\text{H}_{19}\text{N}_2\text{O}_2$  ( $\text{M}^+ + \text{H}$ ) 295.1446, found 295.1450.

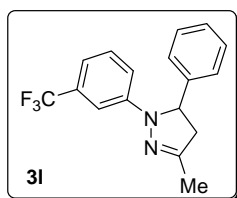

<sup>18</sup> D. N. Dhar, R. Raghunathan, *Indian J. Chem.*, 1984, **23B**, 1187-1189.

**3-Methyl-5-phenyl-1-(3-(trifluoromethyl)phenyl)-4,5-dihydro-1H-pyrazole (3l):** thick liquid; yield 78%;  $R_f = 0.45$  (hexane/EtOAc = 90/10);  $^1\text{H NMR}$  ( $\text{CDCl}_3$ , 300 MHz):  $\delta$  7.32 (t,  $J = 7.3$  Hz, 2H), 7.26-7.23 (m, 4H), 7.14 (t,  $J = 8.2$  Hz, 1H), 6.92 (d,  $J = 8.2$  Hz, 1H), 6.82 (d,  $J = 8.2$  Hz, 1H), 5.01 (dd,  $J = 11.9, 7.3$  Hz, 1H), 3.43 (dd,  $J = 17.4, 11.9$  Hz, 1H), 2.76 (dd,  $J = 17.4, 7.3$  Hz, 1H), 2.14 (s, 3H);  $^{13}\text{C NMR}$  ( $\text{CDCl}_3$ , 75 MHz):  $\delta$  149.6, 142.2, 129.2, 128.6, 125.7, 123.6, 115.3, 114.7, 109.8, 108.5, 64.3, 47.8, 15.8; IR (film):  $\nu_{\text{max}}$  3170, 2932, 2862, 1590, 1490, 1443, 1117, 1072, 781; HRMS calcd for  $\text{C}_{17}\text{H}_{16}\text{N}_2\text{F}_3$  ( $\text{M}^+ + \text{H}$ ) 305.1125, found 305.1114.

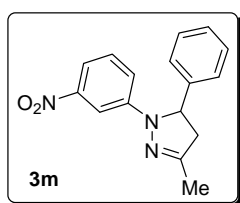

**3-Methyl-1-(3-nitrophenyl)-5-phenyl-4,5-dihydro-1H-pyrazole (3m):**<sup>19</sup> solid; M.p. 92–94 °C (ref. M.p. 86–88 °C); yield 52%;  $R_f = 0.44$  (hexane/EtOAc = 90/10);  $^1\text{H NMR}$  ( $\text{CDCl}_3$ , 300 MHz):  $\delta$  7.71 (s, 1H), 7.50 (dd,  $J = 7.9, 1.9$  Hz, 1H), 7.32 (t,  $J = 7.9$  Hz, 2H), 7.26-7.23 (m, 3H), 7.19 (t,  $J = 7.9, 1.9$  Hz, 1H), 7.06 (dd,  $J = 7.9, 1.9$  Hz, 1H), 5.06 (dd,  $J = 11.9, 6.9$  Hz, 1H), 3.47 (dd,  $J = 17.8, 11.9$  Hz, 1H), 2.77 (dd,  $J = 17.8, 6.9$  Hz, 1H), 2.10 (s, 3H);  $^{13}\text{C NMR}$  ( $\text{CDCl}_3$ , 75 MHz):  $\delta$  150.4, 149.1, 146.1, 141.6, 129.4, 129.3, 127.8, 125.7, 118.2, 112.7, 107.4, 64.1, 47.9, 15.8; IR (KBr):  $\nu_{\text{max}}$  3296, 3047, 1617, 1526, 1493, 1365, 1334, 1263, 1092, 958, 745; HRMS calcd for  $\text{C}_{16}\text{H}_{16}\text{N}_3\text{O}_2$  ( $\text{M}^+ + \text{H}$ ) 282.1242 found 282.1246.

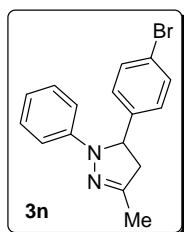

<sup>19</sup> H. Ferres, M. S. Hamdam, W. R. Jackson, *J. Chem. Soc. (B): Phys. Org.*, 1971, 1892-1898.

**5-(4-Bromophenyl)-3-methyl-1-phenyl-4,5-dihydro-1H-pyrazole (3n):**<sup>20</sup> thick liquid; yield 72%;  $R_f = 0.63$  (hexane/EtOAc = 90/10);  $^1\text{H NMR}$  ( $\text{CDCl}_3$ , 300 MHz):  $\delta$  7.44-7.32 (m, 3H), 7.29-7.22 (m, 3H), 6.81 (d,  $J = 7.7$  Hz, 2H), 6.69 (t,  $J = 7.3$  Hz, 1H), 4.94 (dd,  $J = 11.9$ , 7.9 Hz, 1H), 3.38 (dd,  $J = 17.4$ , 11.9 Hz, 1H), 2.64 (dd,  $J = 17.4$ , 7.9 Hz, 1H), 2.06 (s, 3H);  $^{13}\text{C NMR}$  ( $\text{CDCl}_3$ , 75 MHz):  $\delta$  148.4, 145.7, 141.9, 132.1, 131.6, 130.1, 128.9, 127.6, 125.1, 121.1, 118.8, 113.1, 107.8, 64.1, 47.6, 15.8; IR (film):  $\nu_{\text{max}}$  3208, 3056, 2966, 1628, 1592, 1312, 1102, 992, 770; HRMS calcd for  $\text{C}_{16}\text{H}_{16}\text{N}_2\text{Br}$  ( $\text{M}^+ + \text{H}$ ) 315.0356, found 315.0353.

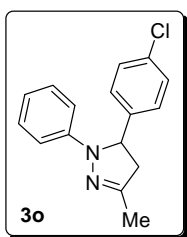

**5-(4-Chlorophenyl)-3-methyl-1-phenyl-4,5-dihydro-1H-pyrazole (3o):** thick liquid; yield 75%;  $R_f = 0.64$  (hexane/EtOAc = 90/10);  $^1\text{H NMR}$  ( $\text{CDCl}_3$ , 300 MHz):  $\delta$  7.29-7.19 (m, 4H), 7.10-7.05 (m, 2H), 6.81 (d,  $J = 9.1$  Hz, 2H), 6.69 (t,  $J = 6.8$  Hz, 1H), 4.95 (dd,  $J = 12.1$ , 8.3 Hz, 1H), 3.38 (dd,  $J = 17.4$ , 12.1 Hz, 1H), 2.64 (dd,  $J = 17.4$ , 8.3 Hz, 1H), 2.05 (s, 3H);  $^{13}\text{C NMR}$  ( $\text{CDCl}_3$ , 75 MHz):  $\delta$  148.4, 145.7, 141.4, 132.9, 129.1, 128.8, 127.3, 118.8, 113.1, 64.1, 47.6, 15.8; IR (film):  $\nu_{\text{max}}$  3185, 2925, 1564, 1241, 1020, 771; HRMS calcd for  $\text{C}_{16}\text{H}_{16}\text{N}_2\text{Cl}$  ( $\text{M}^+ + \text{H}$ ) 271.0861, found 271.0855.

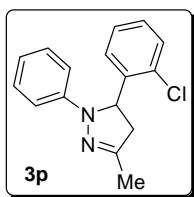

**5-(2-Chlorophenyl)-3-methyl-1-phenyl-4,5-dihydro-1H-pyrazole (3p):**<sup>21</sup> thick liquid; yield 76%;  $R_f = 0.63$  (hexane/EtOAc = 90/10);  $^1\text{H NMR}$  ( $\text{CDCl}_3$ , 300 MHz):  $\delta$  7.41-7.37 (m, 1H), 7.22-7.04 (m, 5H), 6.78 (d,  $J = 7.5$  Hz, 2H), 6.70 (t,  $J = 6.8$  Hz, 1H), 5.34 (dd,  $J = 12.1$ , 7.5 Hz, 1H), 3.56 (dd,  $J = 17.4$ , 12.1 Hz, 1H), 2.59 (dd,  $J = 17.4$ , 7.5 Hz, 1H), 2.06 (s, 3H);  $^{13}\text{C}$

<sup>20</sup> Y. Chen, Y. Lam, Y.-H. Lai, *Org. Lett.*, 2003, **5**, 1067-1069.

<sup>21</sup> W. J. Begley, J. Grimshaw, J. Trocha-Grimshaw, *J. Chem. Soc., Perkin Transaction I*, 1974, 2633-2637.



NMR (CDCl<sub>3</sub>, 75 MHz):  $\delta$  148.8, 145.5, 139.7, 131.7, 129.7, 129.3, 128.9, 128.5, 127.5, 127.4, 118.7, 112.8, 61.5, 45.9, 15.8; IR (film):  $\nu_{max}$  3060, 2924, 1699, 1597, 1438, 1367, 1155, 968, 759; HRMS calcd for C<sub>16</sub>H<sub>16</sub>N<sub>2</sub>Cl (M<sup>+</sup> + H) 271.0861, found 271.0873.

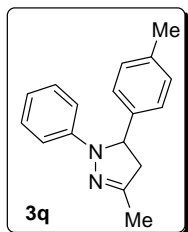

**3-Methyl-1-phenyl-5-p-tolyl-4,5-dihydro-1H-pyrazole (3q)**: solid; M.p. 93–95 °C; yield 73%;  $R_f$  = 0.63 (hexane/EtOAc = 90/10); <sup>1</sup>H NMR (CDCl<sub>3</sub>, 300 MHz):  $\delta$  7.29-7.22 (m, 1H), 7.15-7.04 (m, 5H), 6.83 (d,  $J$  = 7.9 Hz, 2H), 6.66 (t,  $J$  = 7.2 Hz, 1H), 4.93 (dd,  $J$  = 11.9, 8.1 Hz, 1H), 3.35 (dd,  $J$  = 17.2, 11.9 Hz, 1H), 2.65 (dd,  $J$  = 17.2, 8.1 Hz, 1H), 2.32 (s, 3H), 2.04 (s, 3H); <sup>13</sup>C NMR (CDCl<sub>3</sub>, 75 MHz):  $\delta$  148.4, 146.0, 139.9, 136.8, 136.8, 129.6, 128.7, 128.4, 127.1, 125.7, 125.1, 118.4, 112.9, 107.4, 64.4, 47.8, 21.0, 15.8; IR (KBr):  $\nu_{max}$  3126, 2953, 1630, 1502, 1260, 1027, 780; HRMS calcd for C<sub>17</sub>H<sub>19</sub>N<sub>2</sub> (M<sup>+</sup> + H) 251.1415, found 251.1418.

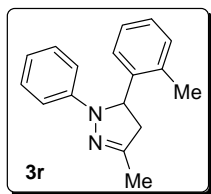

**3-Methyl-1-phenyl-5-o-tolyl-4,5-dihydro-1H-pyrazole (3r)**: thick liquid; yield 71%;  $R_f$  = 0.58 (hexane/EtOAc = 90/10); <sup>1</sup>H NMR (CDCl<sub>3</sub>, 300 MHz):  $\delta$  7.22-7.05 (m, 6H), 6.76 (d,  $J$  = 7.7 Hz, 2H), 6.67 (t,  $J$  = 7.2 Hz, 1H), 5.10 (dd,  $J$  = 11.9, 8.3 Hz, 1H), 3.45 (dd,  $J$  = 16.6, 11.9 Hz, 1H), 2.57 (dd,  $J$  = 16.8, 8.3 Hz, 1H), 2.41 (s, 3H), 2.06 (s, 3H); <sup>13</sup>C NMR (CDCl<sub>3</sub>, 75 MHz):  $\delta$  150.5, 141.3, 130.1, 127.5, 111.8, 110.8, 107.5, 104.6, 55.5, 29.7, 14.2, 13.7; IR (film):  $\nu_{max}$  3029, 2928, 1736, 1607, 1534, 1465, 1372, 1240, 1047, 913, 748; HRMS calcd for C<sub>17</sub>H<sub>19</sub>N<sub>2</sub> (M<sup>+</sup> + H) 251.1407, found 251.1420.

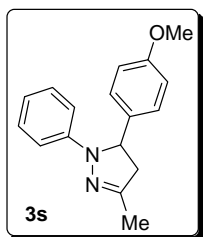

**5-(4-Methoxyphenyl)-3-methyl-1-phenyl-4,5-dihydro-1H-pyrazole (3s):**<sup>20</sup> thick liquid; yield 72%;  $R_f = 0.64$  (hexane/EtOAc = 90/10);  $^1\text{H NMR}$  ( $\text{CDCl}_3$ , 300 MHz):  $\delta$  7.36-7.27 (m, 2H), 7.16 (d,  $J = 8.3$  Hz, 2H), 7.11-7.06 (m, 2H), 6.81-6.77 (m, 2H), 6.67 (t,  $J = 7.5$  Hz, 1H), 4.92 (dd,  $J = 11.3, 8.3$  Hz, 1H), 3.76 (s, 3H), 3.34 (dd,  $J = 17.4, 11.3$  Hz, 1H), 2.65 (dd,  $J = 17.4, 8.3$  Hz, 1H), 2.06 (s, 3H);  $^{13}\text{C NMR}$  ( $\text{CDCl}_3$ , 75 MHz):  $\delta$  148.5, 146.0, 140.1, 135.0, 129.8, 128.7, 126.9, 125.1, 118.5, 114.3, 113.8, 113.1, 107.2, 64.2, 55.2, 47.8, 15.9; IR (film):  $\nu_{\text{max}}$  3046, 2930, 1630, 123, 1027, 750; HRMS calcd for  $\text{C}_{17}\text{H}_{19}\text{N}_2\text{O}$  ( $\text{M}^+ + \text{H}$ ) 267.1356, found 267.1367.

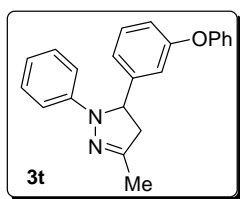

**3-Methyl-5-(3-phenoxyphenyl)-1-phenyl-4,5-dihydro-1H-pyrazole (3t):** thick liquid; yield 69%;  $R_f = 0.62$  (hexane/EtOAc = 90/10);  $^1\text{H NMR}$  ( $\text{CDCl}_3$ , 300 MHz):  $\delta$  7.32-7.19 (m, 5H), 7.12-6.97 (m, 3H), 6.93-6.90 (m, 2H), 6.85-6.80 (m, 3H), 6.70 (t,  $J = 7.2$ , 1H), 4.95 (dd,  $J = 11.9, 7.9$  Hz, 1H), 3.37 (dd,  $J = 17.4, 11.9$  Hz, 1H), 2.71 (dd,  $J = 17.4, 7.9$  Hz, 1H), 2.04 (s, 3H);  $^{13}\text{C NMR}$  ( $\text{CDCl}_3$ , 75 MHz):  $\delta$  148.5, 145.9, 145.2, 138.8, 129.7, 128.8, 125.3, 123.3, 120.7, 119.1, 118.8, 117.6, 116.5, 113.4, 113.2, 107.8, 64.5, 47.7, 14.2; IR (film):  $\nu_{\text{max}}$  3085, 2926, 1582, 1488, 1237, 889, 758, 692; HRMS calcd for  $\text{C}_{22}\text{H}_{21}\text{N}_2\text{O}$  ( $\text{M}^+ + \text{H}$ ) 329.1653, found 329.1669.

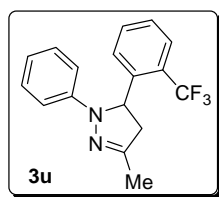

**3-Methyl-1-phenyl-5-(2-(trifluoromethyl)phenyl)-4,5-dihydro-1H-pyrazole (3u):** thick liquid; yield 60%;  $R_f = 0.51$  (hexane/EtOAc = 90/10);  $^1\text{H NMR}$  ( $\text{CDCl}_3$ , 300 MHz):  $\delta$  7.69 (d,  $J = 7.6$  Hz, 1H), 7.46-7.43 (m, 2H), 7.36-7.30 (m, 1H), 7.07 (t,  $J = 8.3$  Hz, 2H), 6.77 (d,  $J = 8.3$  Hz, 2H), 6.67 (t,  $J = 7.6$  Hz, 1H), 5.43 (dd,  $J = 12.1, 7.5$  Hz, 1H), 3.47 (dd,  $J = 18.2, 12.1$  Hz, 1H), 2.62 (dd,  $J = 18.2, 7.5$  Hz, 1H), 2.05, (s, 3H);  $^{13}\text{C NMR}$  ( $\text{CDCl}_3$ , 75 MHz):  $\delta$  147.9, 145.2, 141.3, 133.0, 128.9, 127.4, 127.2, 126.1, 118.6, 112.7, 60.5, 47.8, 15.7; IR (film):  $\nu_{\text{max}}$  3102, 2925, 2854, 1735, 1599, 1501, 1314, 1167, 1127, 967, 765; HRMS calcd for  $\text{C}_{17}\text{H}_{16}\text{N}_2\text{F}_3$  ( $\text{M}^+ + \text{H}$ ) 305.1115, found 305.1120.

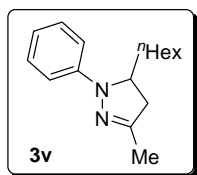

**5-Hexyl-3-methyl-1-phenyl-4,5-dihydro-1H-pyrazole (3v):** thick liquid; yield 53%;  $R_f = 0.65$  (hexane/EtOAc = 90/10);  $^1\text{H NMR}$  ( $\text{CDCl}_3$ , 300 MHz):  $\delta$  7.56 (d,  $J = 7.5$  Hz, 1H), 7.47-7.36 (m, 2H), 7.29 (d,  $J = 7.5$  Hz, 1H), 7.09 (m, 1H), 2.73 (t,  $J = 7.5$  Hz, 1H), 2.61 (dd,  $J = 17.4, 9.1$  Hz, 1H), 2.33 (d,  $J = 5.3$  Hz, 1H), 1.76-1.43 (m, 2H), 1.44-1.14 (m, 10 H), 0.95-0.78 (m, 4H);  $^{13}\text{C NMR}$  ( $\text{CDCl}_3$ , 75 MHz):  $\delta$  129.1, 124.9, 121.8, 120.9, 119.0, 113.0, 111.0, 42.7, 32.8, 31.8, 29.7, 25.1, 22.6, 16.1, 14.1, 12.4; IR (film):  $\nu_{\text{max}}$  3055, 2924, 1728, 1597, 1241, 1020, 771; HRMS calcd for  $\text{C}_{16}\text{H}_{25}\text{N}_2$  ( $\text{M}^+ + \text{H}$ ) 245.1877, found 245.1867.

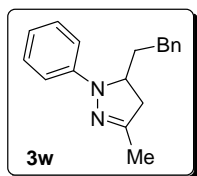

**3-Methyl-5-phenethyl-1-phenyl-4,5-dihydro-1H-pyrazole (3w):** thick liquid; yield 62%;  $R_f = 0.63$  (hexane/EtOAc = 90/10);  $^1\text{H NMR}$  ( $\text{CDCl}_3$ , 300 MHz):  $\delta$  7.26-7.21 (m, 2H), 7.17-7.11 (m, 5H), 6.86 (d,  $J = 7.5$  Hz, 2H), 6.71 (t,  $J = 7.5$  Hz, 1H), 3.02 (dd,  $J = 17.4, 11.3$  Hz, 1H), 2.72-2.63 (m, 1H), 2.61-2.51 (m, 2H), 1.19-2.05 (m, 1H), 2.03 (s, 3H), 1.87-1.74 (m, 1H), 1.09-0.78 (m, 1H);  $^{13}\text{C NMR}$  ( $\text{CDCl}_3$ , 75 MHz):  $\delta$  149.1, 145.5, 141.1, 128.9, 128.4, 128.3, 126.0,

118.4, 113.1, 59.4, 42.6, 34.3, 31.3, 16.0; IR (film):  $\nu_{max}$  3027, 2926, 1722, 1598, 1503, 1454, 1383, 1287, 1073, 912; HRMS calcd for  $C_{18}H_{21}N_2$  ( $M^+ + H$ ) 265.1345, found 265.1342.

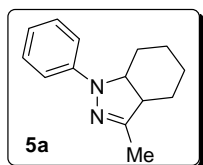

**3-Methyl-1-phenyl-3a,4,5,6,7,7a-hexahydro-1H-indazole (5a):**<sup>22</sup> thick liquid; yield 71%;  $R_f = 0.67$  (hexane/EtOAc = 90/10);  $^1H$  NMR ( $CDCl_3$ , 300 MHz):  $\delta$  7.29 (t,  $J = 7.9$  Hz, 2H), 7.23 (t,  $J = 7.9$  Hz, 2H), 6.98 (t,  $J = 6.9$  Hz, 1H), 2.21-2.14 (m, 6H), 2.11-2.02 (m, 5H), 1.93-1.88 (m, 2H);  $^{13}C$  NMR ( $CDCl_3$ , 75 MHz):  $\delta$  129.3, 128.9, 122.5, 119.1, 116.3, 114.9, 60.0, 47.3, 34.7, 26.1, 23.3, 21.7, 14.1; IR (film):  $\nu_{max}$  3061, 2926, 2858, 1725, 1598, 1437, 1280, 1025, 762; HRMS calcd for  $C_{14}H_{19}N_2$  ( $M^+ + H$ ) 215.1543, found 215.1547.

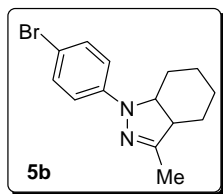

**1-(4-Bromophenyl)-3-methyl-3a,4,5,6,7,7a-hexahydro-1H-indazole (5b):** thick liquid; yield 74%;  $R_f = 0.64$  (hexane/EtOAc = 90/10);  $^1H$  NMR ( $CDCl_3$ , 500 MHz):  $\delta$  7.55-7.49 (m, 2H), 7.35 (d,  $J = 9.1$  Hz, 1H), 6.88 (d,  $J = 9.1$  Hz, 1H), 2.69 (m, 1H), 2.44 (m, 1H), 2.20 (s, 3H), 2.02-1.54 (m, 6H), 1.33-0.88 (m, 2H);  $^{13}C$  NMR ( $CDCl_3$ , 75 MHz):  $\delta$  132.2, 132.1, 131.7, 123.9, 117.4, 116.3, 59.7, 47.3, 34.4, 26.1, 23.1, 22.5, 14.1; IR (film):  $\nu_{max}$  3020, 2933, 2854, 1711, 1590, 1488, 1445, 1384, 1070, 922, 863; HRMS calcd for  $C_{14}H_{18}N_2Br$  ( $M^+ + H$ ) 293.0673, found 293.0679.

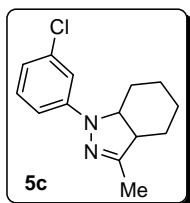

<sup>22</sup> C. W. Alexander, M. S. Hamdam, W. R. Jackson, *J. Chem. Soc., Chemical Communications*, 1972, 94-95.

**1-(3-Chlorophenyl)-3-methyl-3a,4,5,6,7,7a-hexahydro-1H-indazole (5c)**: thick liquid; yield 73%;  $R_f = 0.67$  (hexane/EtOAc = 90/10);  $^1\text{H NMR}$  ( $\text{CDCl}_3$ , 300 MHz):  $\delta$  7.07 (t,  $J = 7.9$  Hz, 1H), 7.00 (t,  $J = 1.8$  Hz, 1H), 6.85 (d,  $J = 8.1$  Hz, 1H), 6.69 (dd,  $J = 7.7, 1.1$  Hz, 1H), 3.02 (m, 1H), 2.04 (s, 3H), 2.00-1.85 (m, 2H), 1.84-1.69 (m, 1H), 1.68-1.51 (m, 2H), 1.33-0.96 (m, 4H);  $^{13}\text{C NMR}$  ( $\text{CDCl}_3$ , 75 MHz):  $\delta$  154.5, 146.7, 134.8, 129.9, 118.4, 114.2, 112.4, 59.5, 47.2, 24.2, 22.9, 22.3, 21.5, 13.9; IR (film):  $\nu_{\text{max}}$  3191, 2924, 1704, 1615, 1514, 1450, 1393, 1242, 1141, 925, 809; HRMS calcd for  $\text{C}_{14}\text{H}_{18}\text{N}_2\text{Cl}$  ( $\text{M}^+ + \text{H}$ ) 249.1148, found 249.1142.

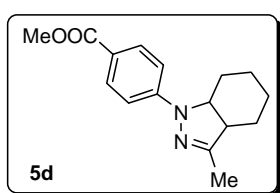

**Methyl 4-(3-methyl-3a,4,5,6,7,7a-hexahydroindazol-1-yl)benzoate (5d)**: thick liquid; yield 63%;  $R_f = 0.53$  (hexane/EtOAc = 90/10);  $^1\text{H NMR}$  ( $\text{CDCl}_3$ , 300 MHz):  $\delta$  8.04 (d,  $J = 8.9$  Hz, 1H), 7.83 (d,  $J = 8.9$  Hz, 1H), 7.55 (d,  $J = 8.9$  Hz, 1H); 6.95 (d,  $J = 8.9$  Hz, 1H), 3.9 (s, 3H), 2.78-2.76 (m, 1H), 2.45-2.43 (m, 1H), 2.20 (s, 3H), 2.09-1.93 (m, 2H), 1.91-1.69 (m, 4H), 1.66-1.56 (m, 1H), 1.36-1.10 (m, 1H);  $^{13}\text{C NMR}$  ( $\text{CDCl}_3$ , 75 MHz):  $\delta$  167.4, 155.5, 148.4, 140.7, 131.2, 130.5, 112.3, 58.6, 51.5, 47.1, 24.4, 22.6, 22.1, 21.3, 14.0; IR (film):  $\nu_{\text{max}}$  3032, 2981, 1725, 1590, 1462, 1357, 1124, 752; HRMS calcd for  $\text{C}_{16}\text{H}_{21}\text{N}_2\text{O}_2$  ( $\text{M}^+ + \text{H}$ ) 273.1462, found 273.1469.

#### 4. General Procedure for Aromatization of Pyrazolines to Pyrazoles<sup>23</sup>

To a solution of pyrazoline 0.0746 mmol in 1 mL acetic acid 20 wt.% of Pd/C(10%) was added and heated to 100 °C for 6 h. After completion of reaction as indicated by TLC catalyst Pd/C was filtered off by using celite. A saturated  $\text{NaHCO}_3$  solution was added to the filtrate and product was extracted twice with EtOAc. The combined organic layers were dried over  $\text{Na}_2\text{SO}_4$ , concentrated under vacuum and the crude product was purified by column chromatography using hexane/EtOAc as eluent to afford the pyrazole.

<sup>23</sup> N. Nakamichi, Y. Kawashita, M. Hayashi, *Org. Lett.*, 2002, **4**, 3955-3957.

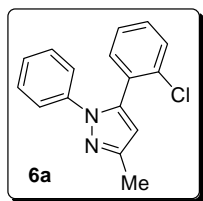

**5-(2-chlorophenyl)-3-methyl-1-phenyl-1H-pyrazole (6a):**<sup>21</sup> thick liquid; yield 95%;  $R_f = 0.72$  (hexane/EtOAc = 95/05);  $^1\text{H NMR}$  ( $\text{CDCl}_3$ , 300 MHz):  $\delta$  7.38 (d,  $J = 7.9$  Hz, 1H), 7.28-7.16 (m, 8H), 6.26 (s, 1H), 2.39 (s, 3H);  $^{13}\text{C NMR}$  ( $\text{CDCl}_3$ , 75 MHz):  $\delta$  149.1, 140.2, 140.1, 133.8, 132.0, 130.5, 129.9, 129.8, 128.7, 126.7, 126.6, 123.8, 109.3, 13.6; IR (film):  $\nu_{\text{max}}$  3018, 3060, 2926, 2856, 1727, 1598, 1501, 1439, 1369, 1282, 1060, 971, 760; HRMS calcd for  $\text{C}_{16}\text{H}_{14}\text{N}_2\text{Cl}$  ( $\text{M}^+ + \text{H}$ ) 269.0731, found 269.0736.

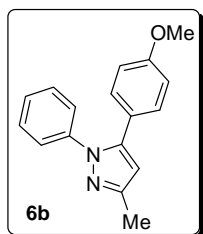

**5-(4-methoxyphenyl)-3-methyl-1-phenyl-1H-pyrazole (6b):**<sup>24</sup> thick liquid; yield 96%;  $R_f = 0.72$  (hexane/EtOAc = 95/05);  $^1\text{H NMR}$  ( $\text{CDCl}_3$ , 300 MHz):  $\delta$  7.30-7.19 (m, 5H), 7.09 (d,  $J = 8.8$  Hz, 2H), 6.76 (d,  $J = 7.9$  Hz, 2H), 6.17 (s, 1H), 3.78 (s, 3H), 2.34 (s, 3H);  $^{13}\text{C NMR}$  ( $\text{CDCl}_3$ , 75 MHz):  $\delta$  159.3, 149.3, 143.5, 140.2, 129.8, 128.7, 126.9, 125.1, 123.1, 113.8, 107.1, 55.2, 13.5; IR (film):  $\nu_{\text{max}}$  3046, 2925, 2853, 1727, 1606, 1507, 1460, 1250, 1032, 763; HRMS calcd for  $\text{C}_{17}\text{H}_{17}\text{N}_2\text{O}$  ( $\text{M}^+ + \text{H}$ ) 265.1342, found 265.1353.

<sup>24</sup> C. A. Dvorak, D. A. Rudolph, S. Ma, N. I. Carruthers, *J. Org. Chem.*, 2005, **70**, 4188-4190.

## 5. $^1\text{H}$ NMR and $^{13}\text{C}$ NMR Spectra of Compounds

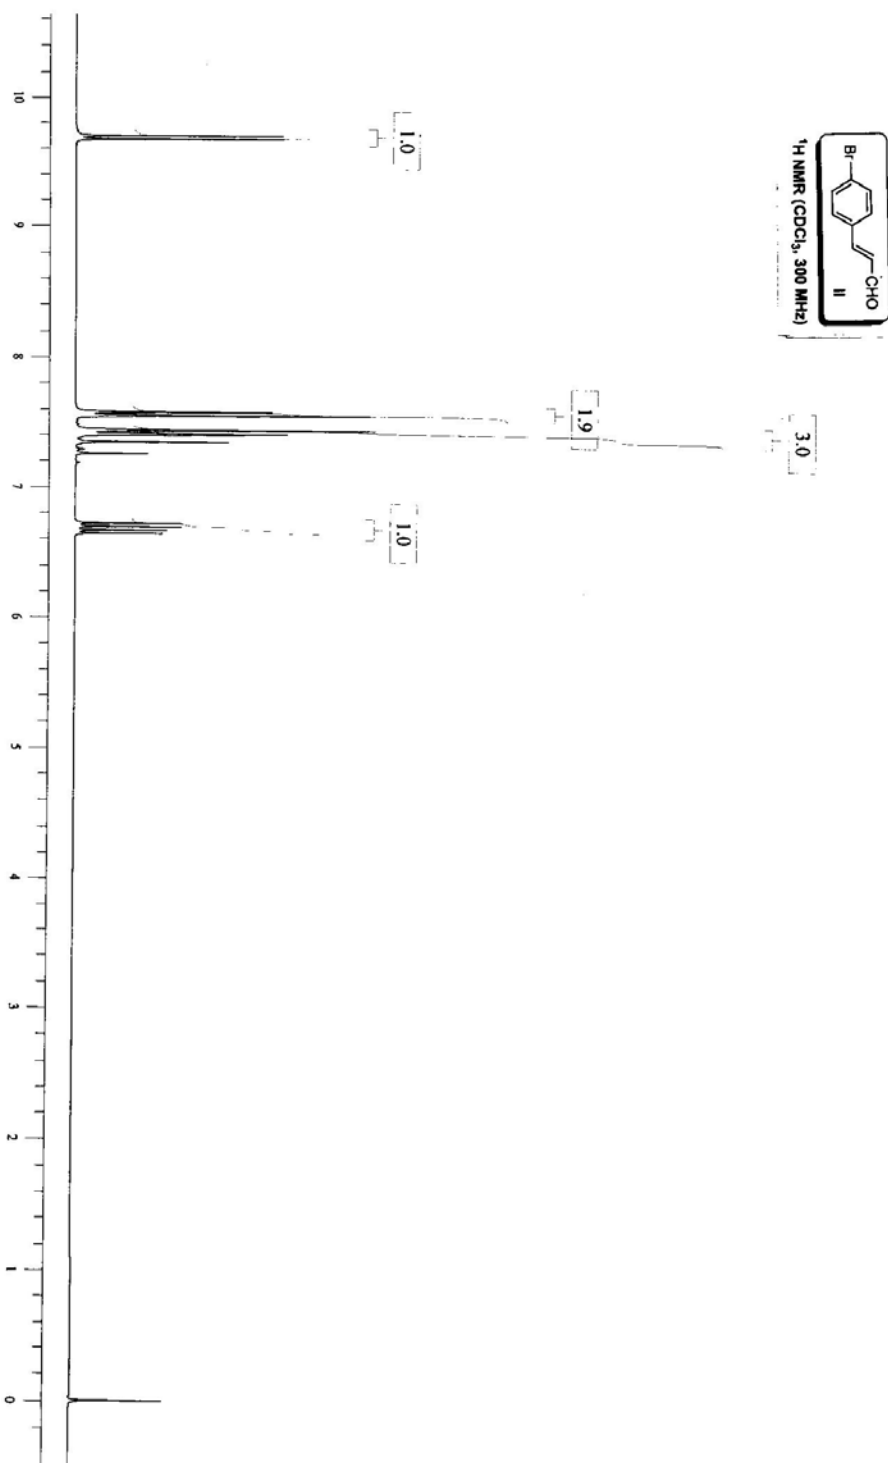

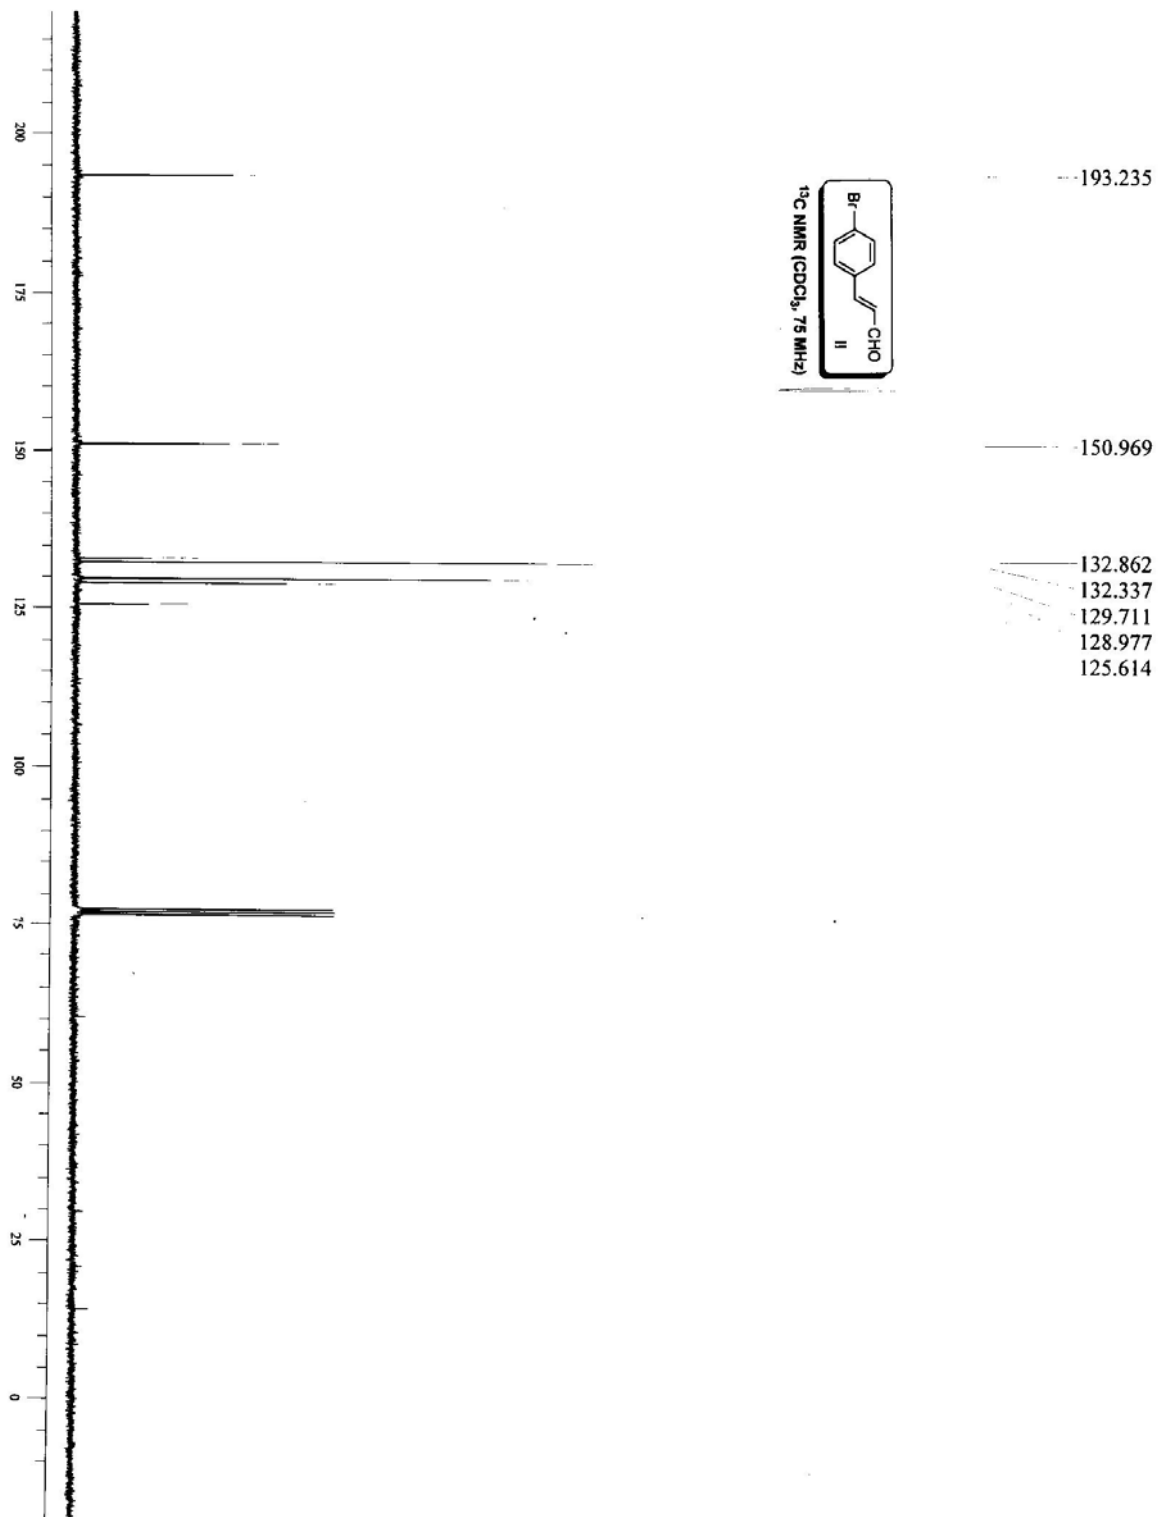



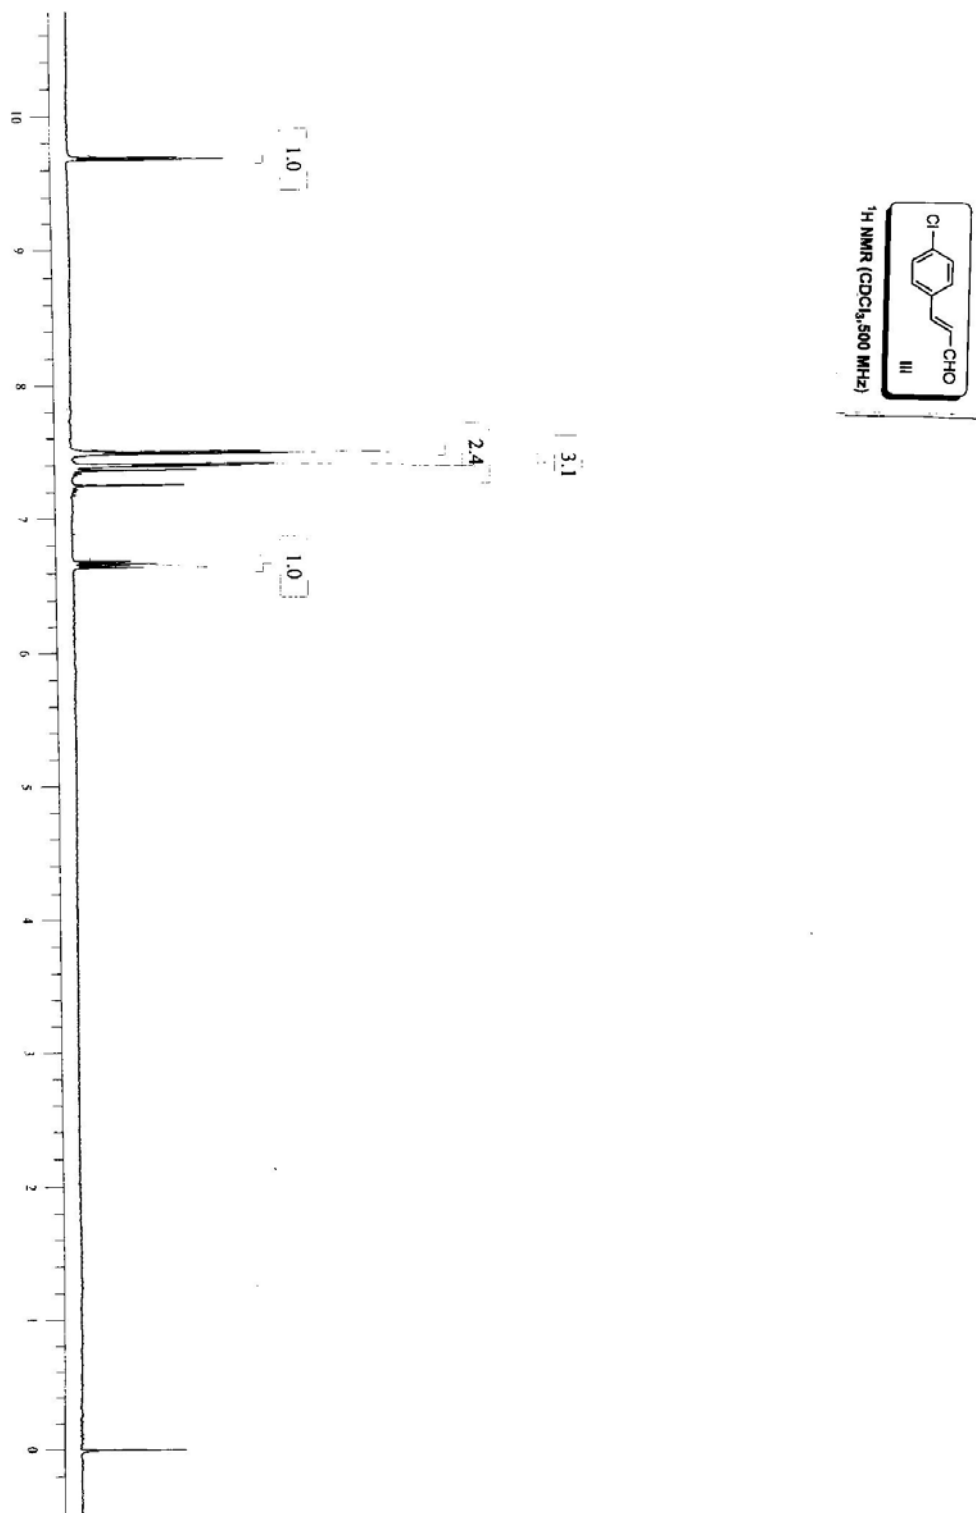

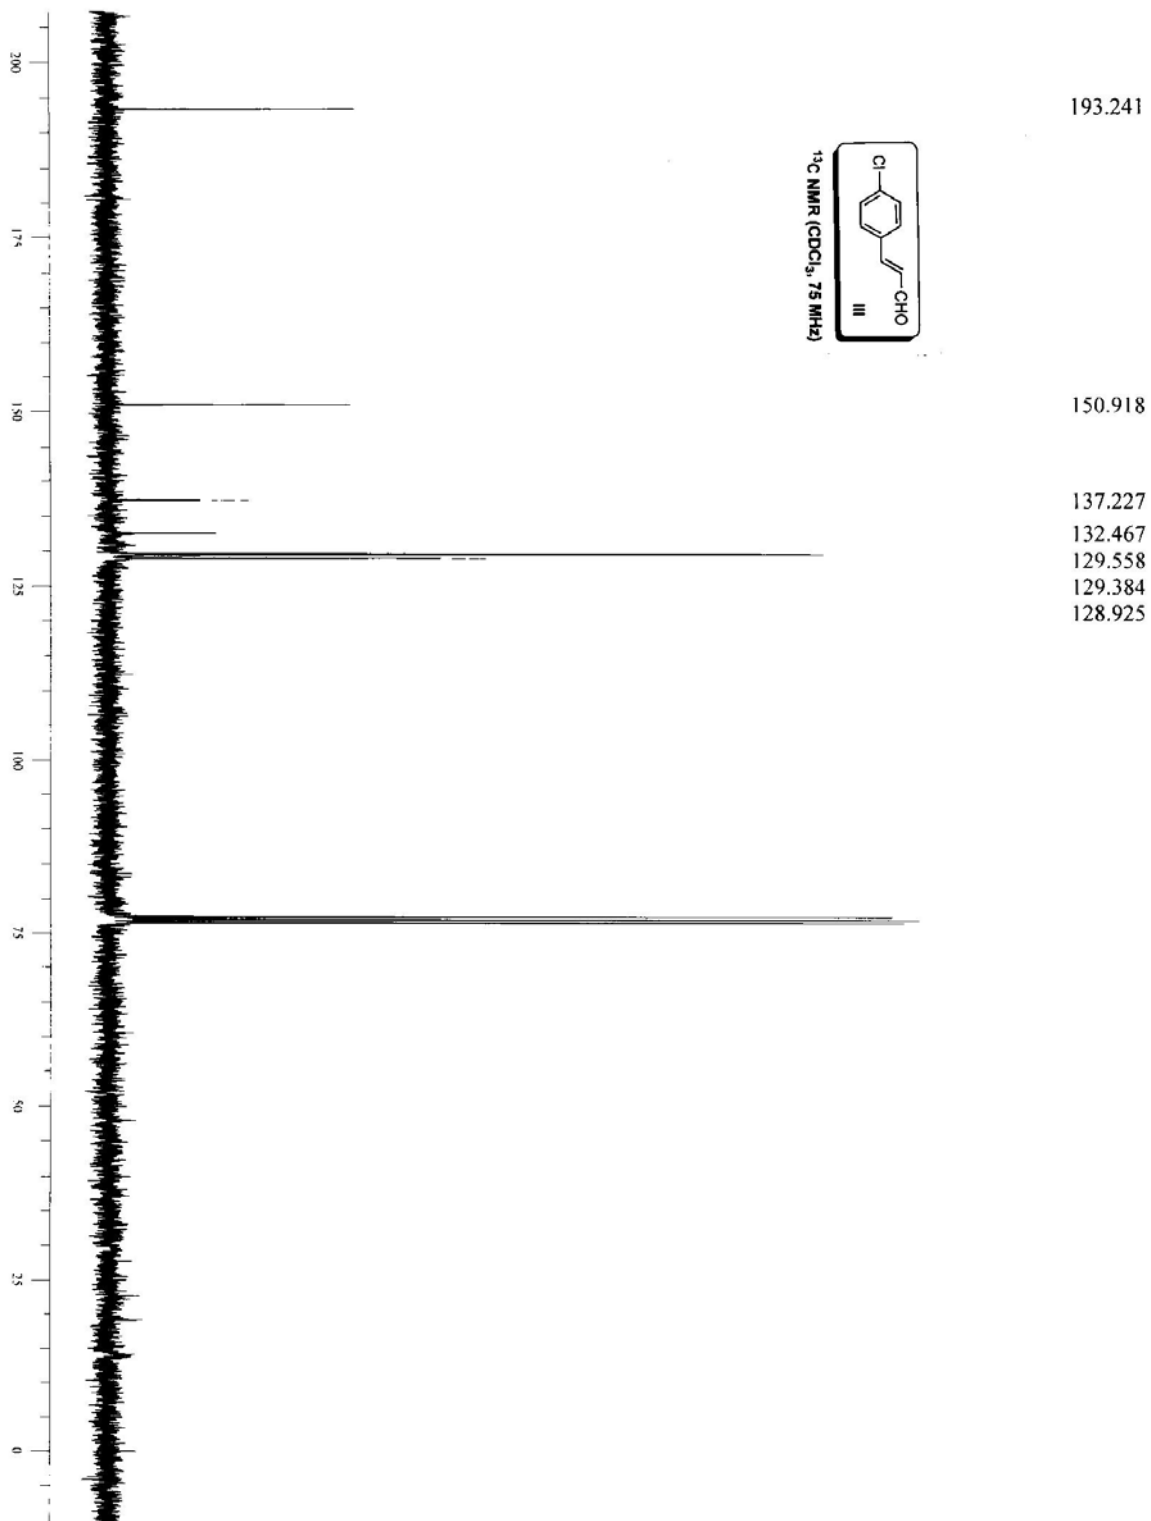

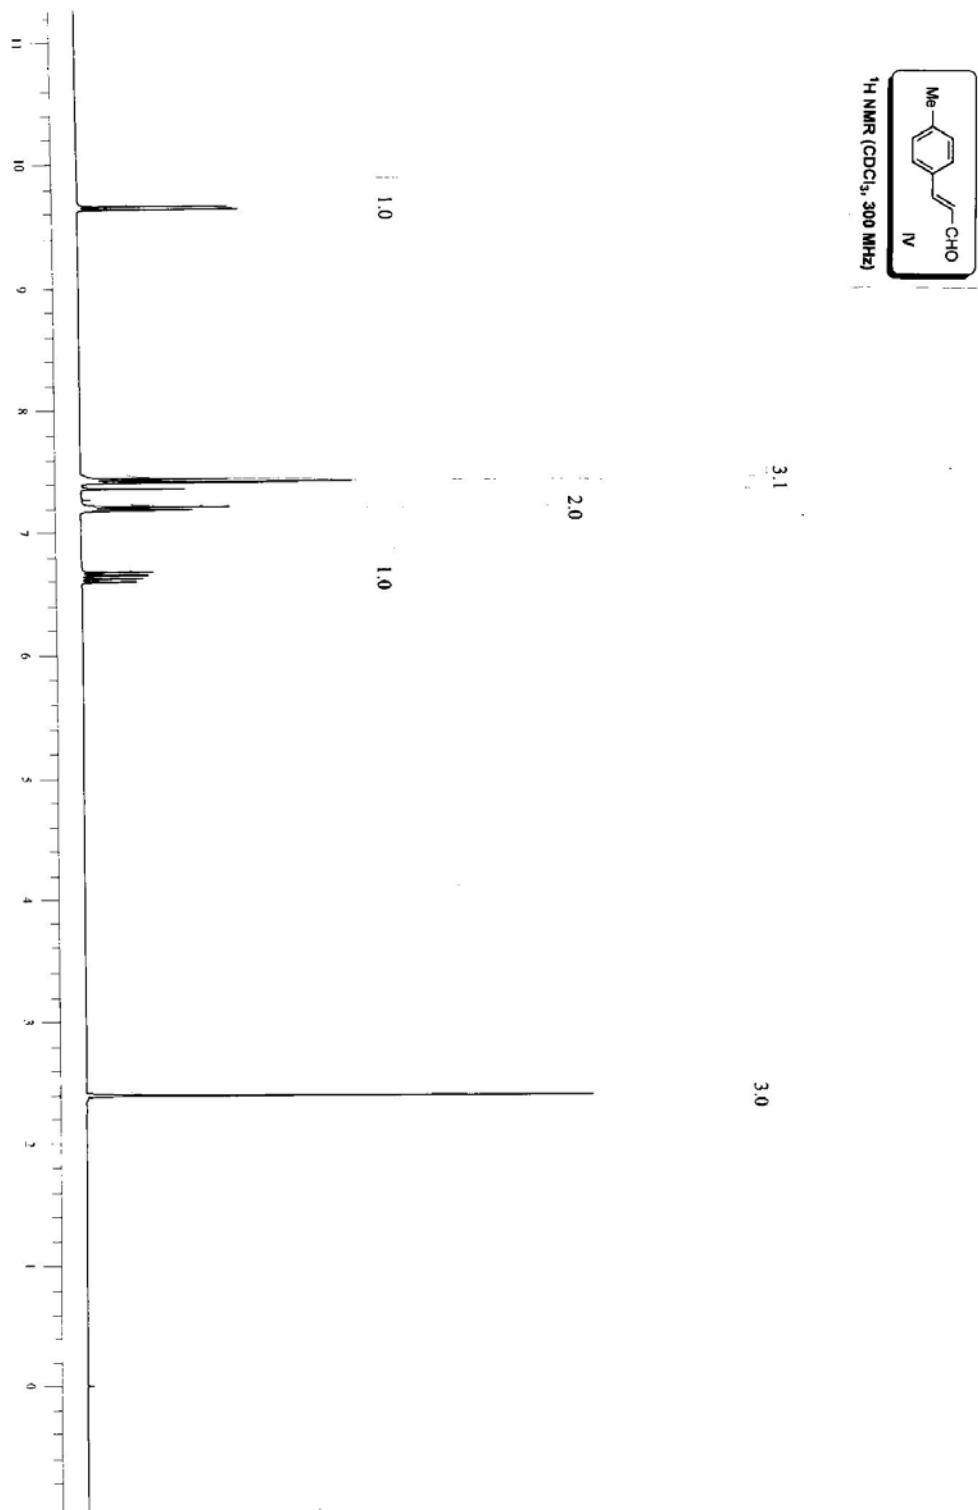

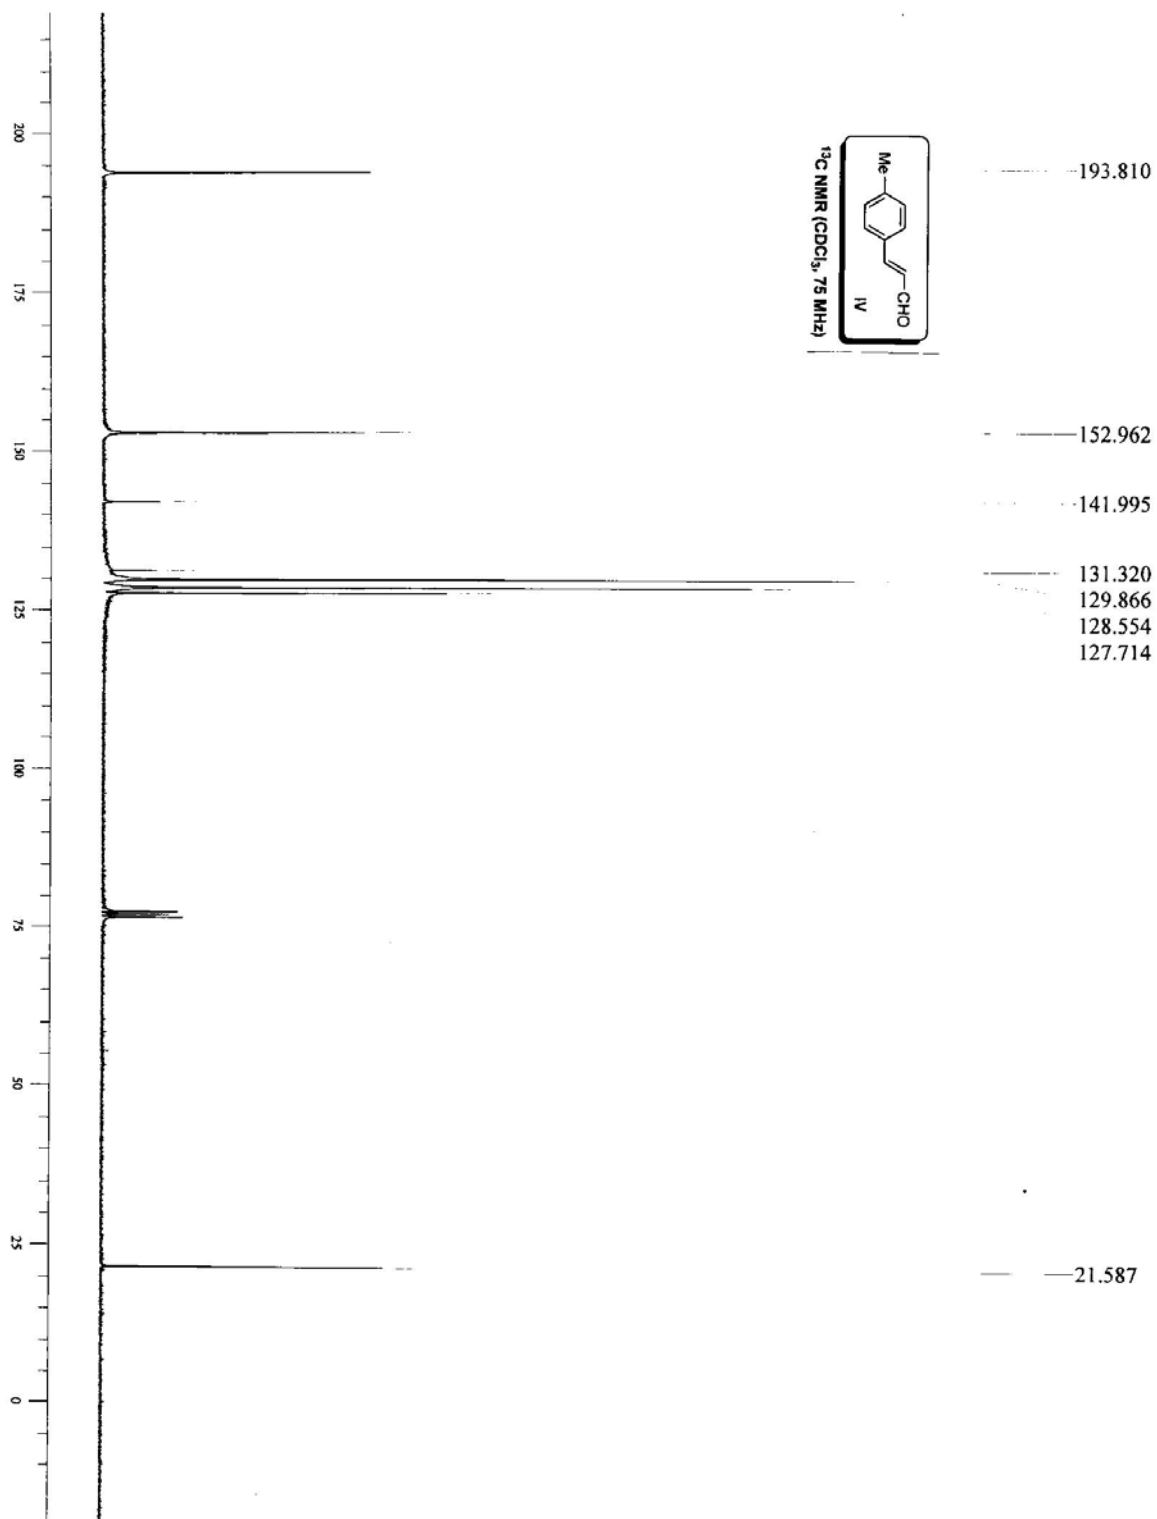

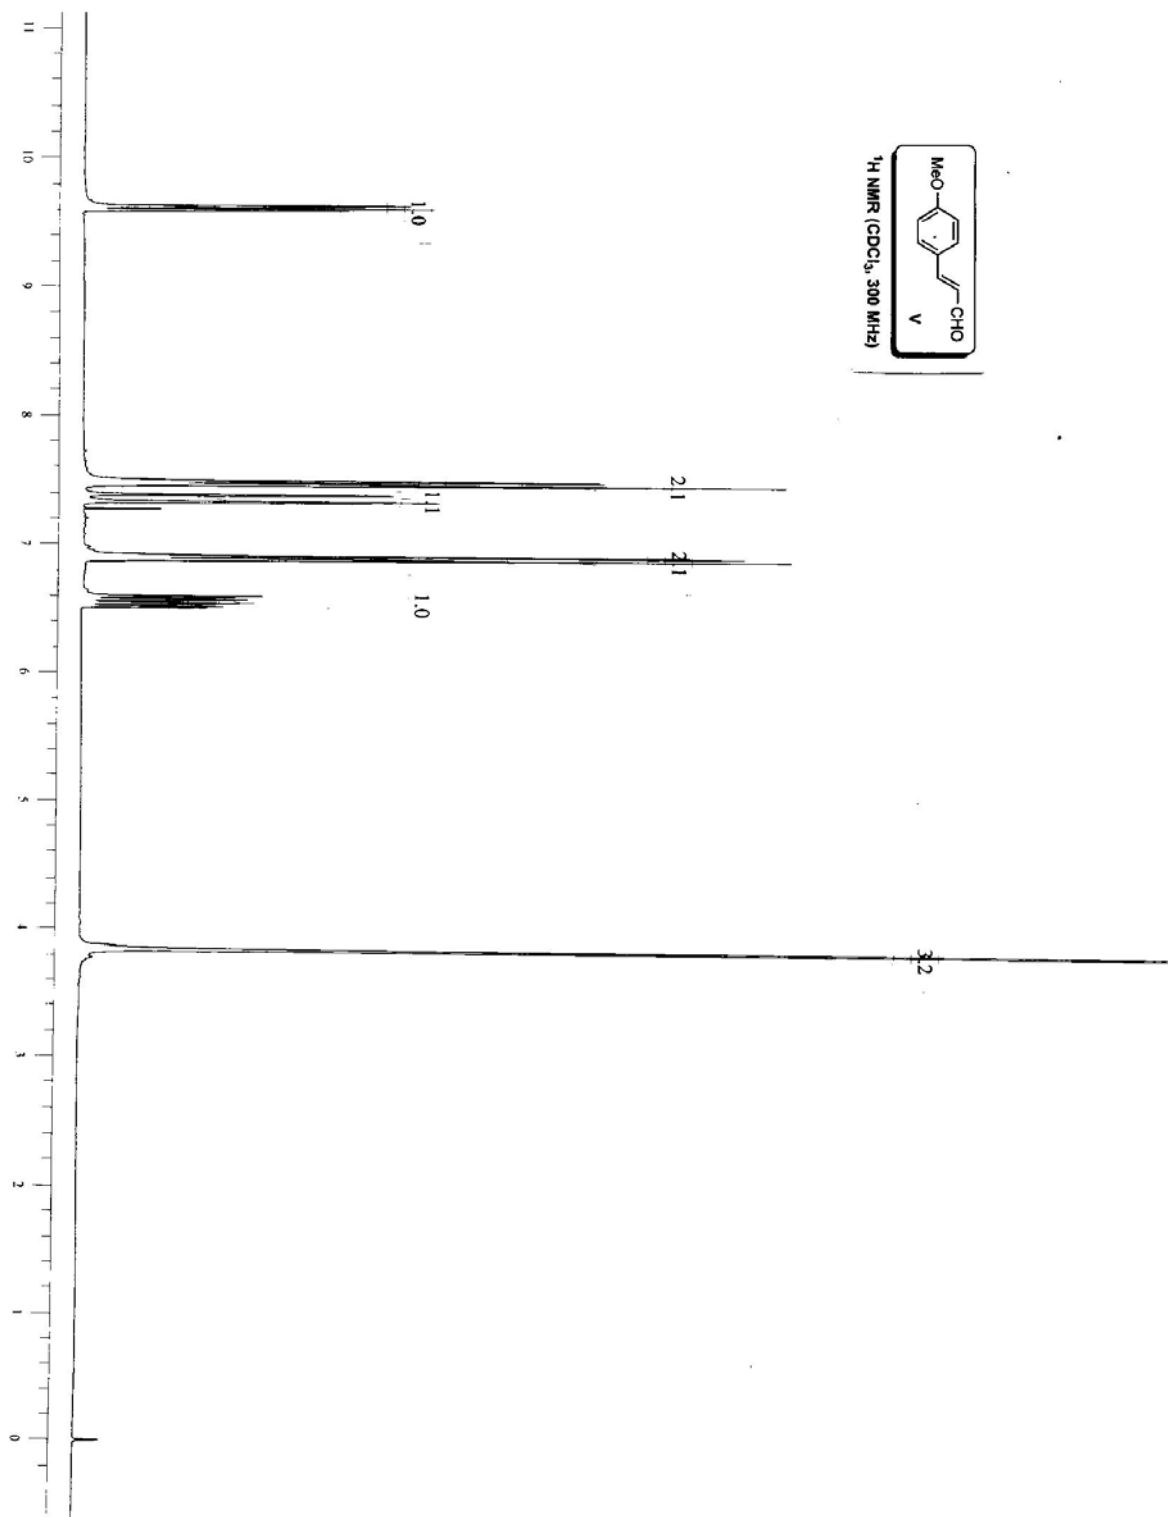

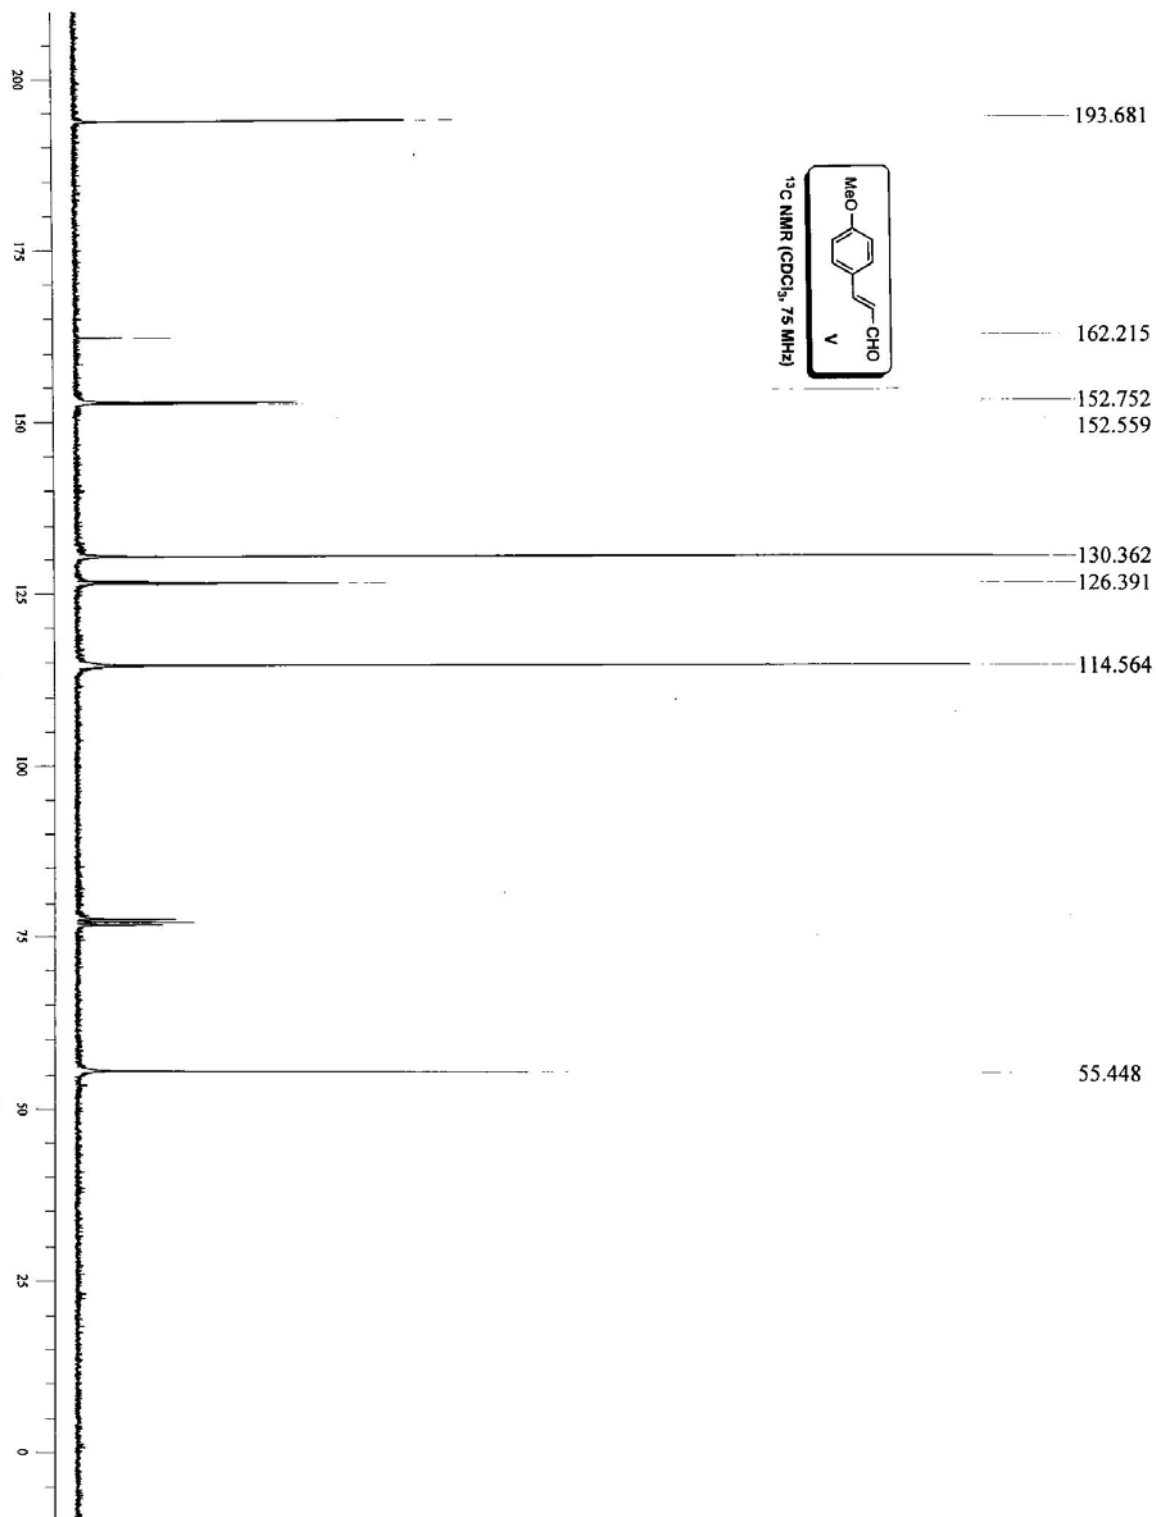

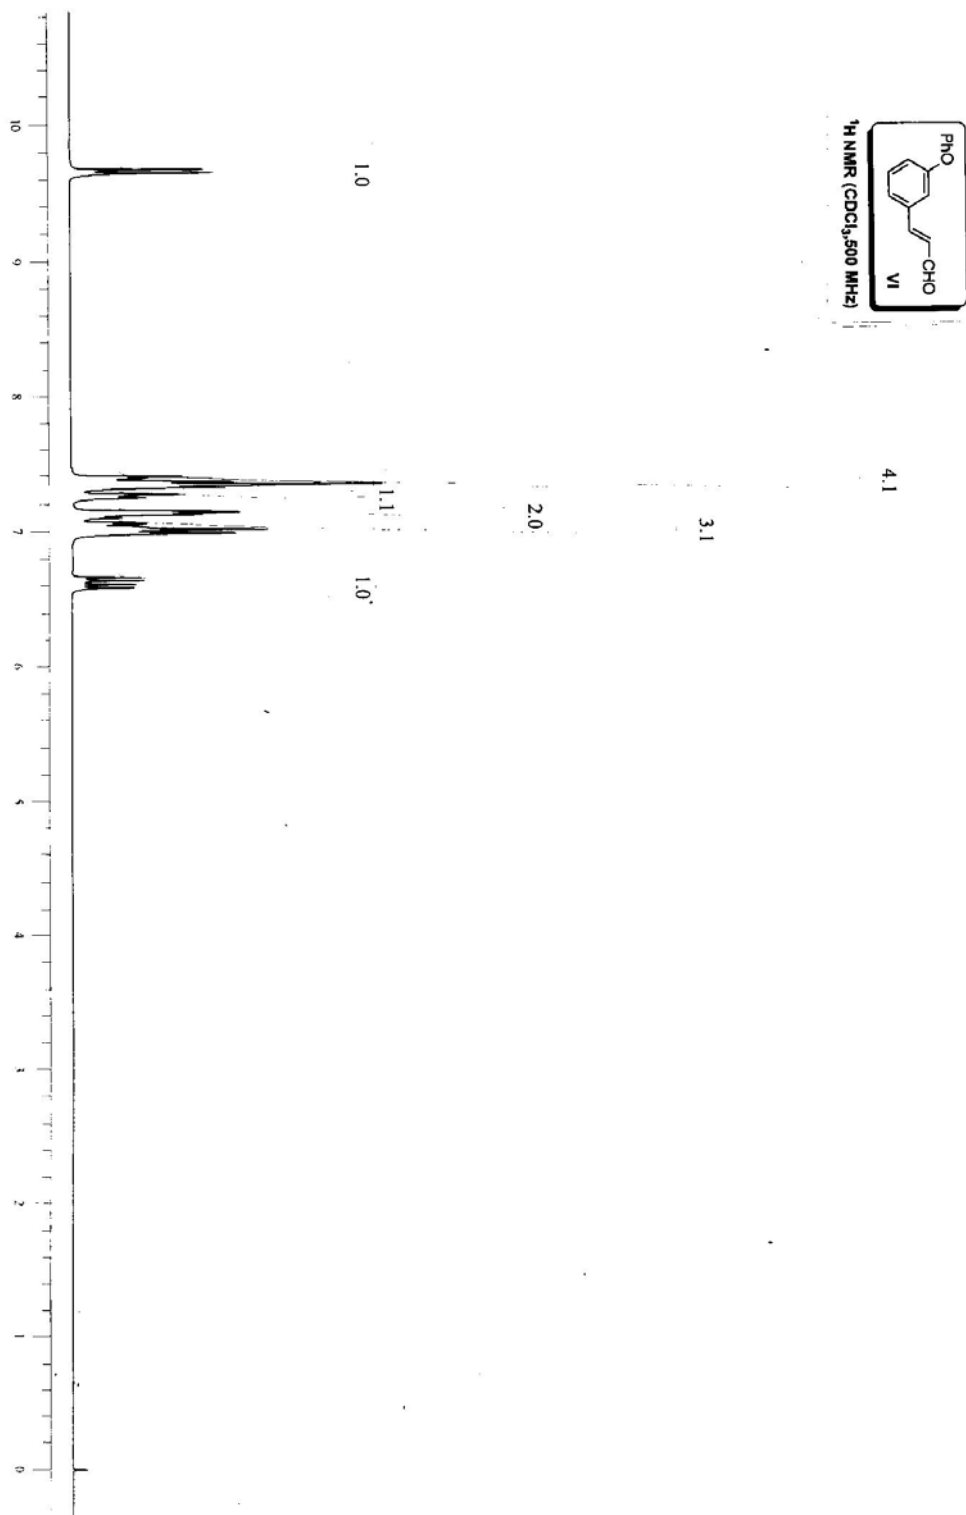

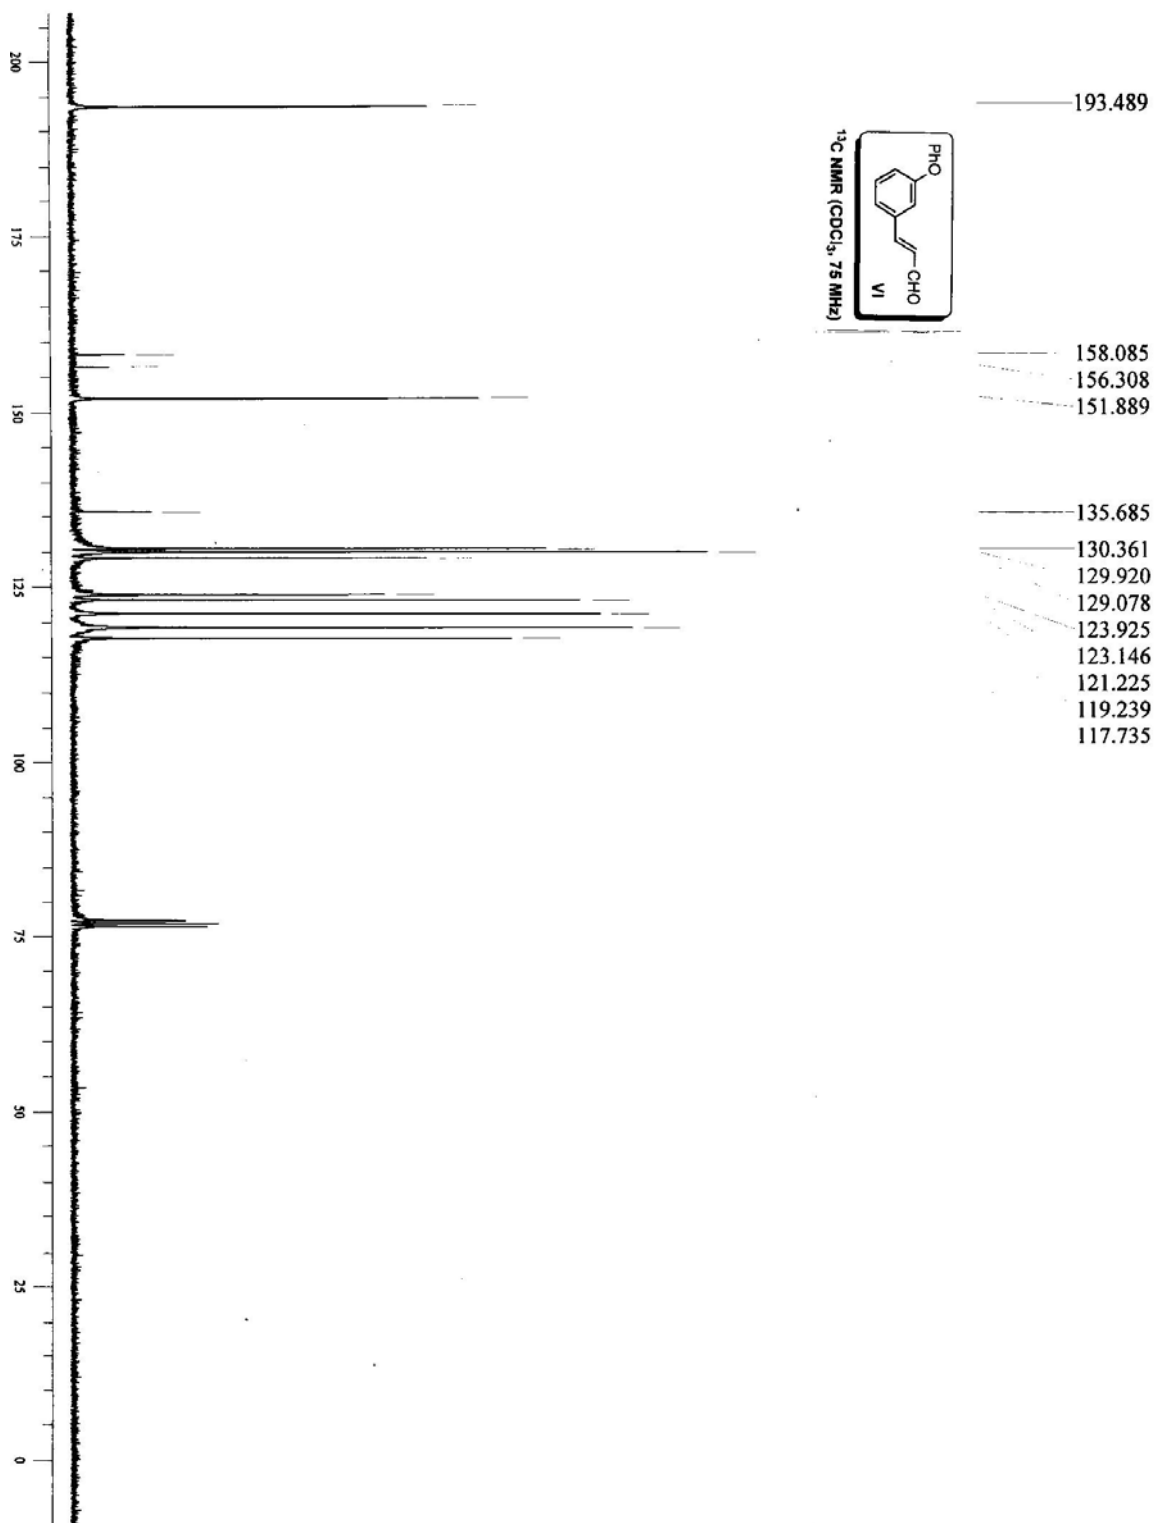



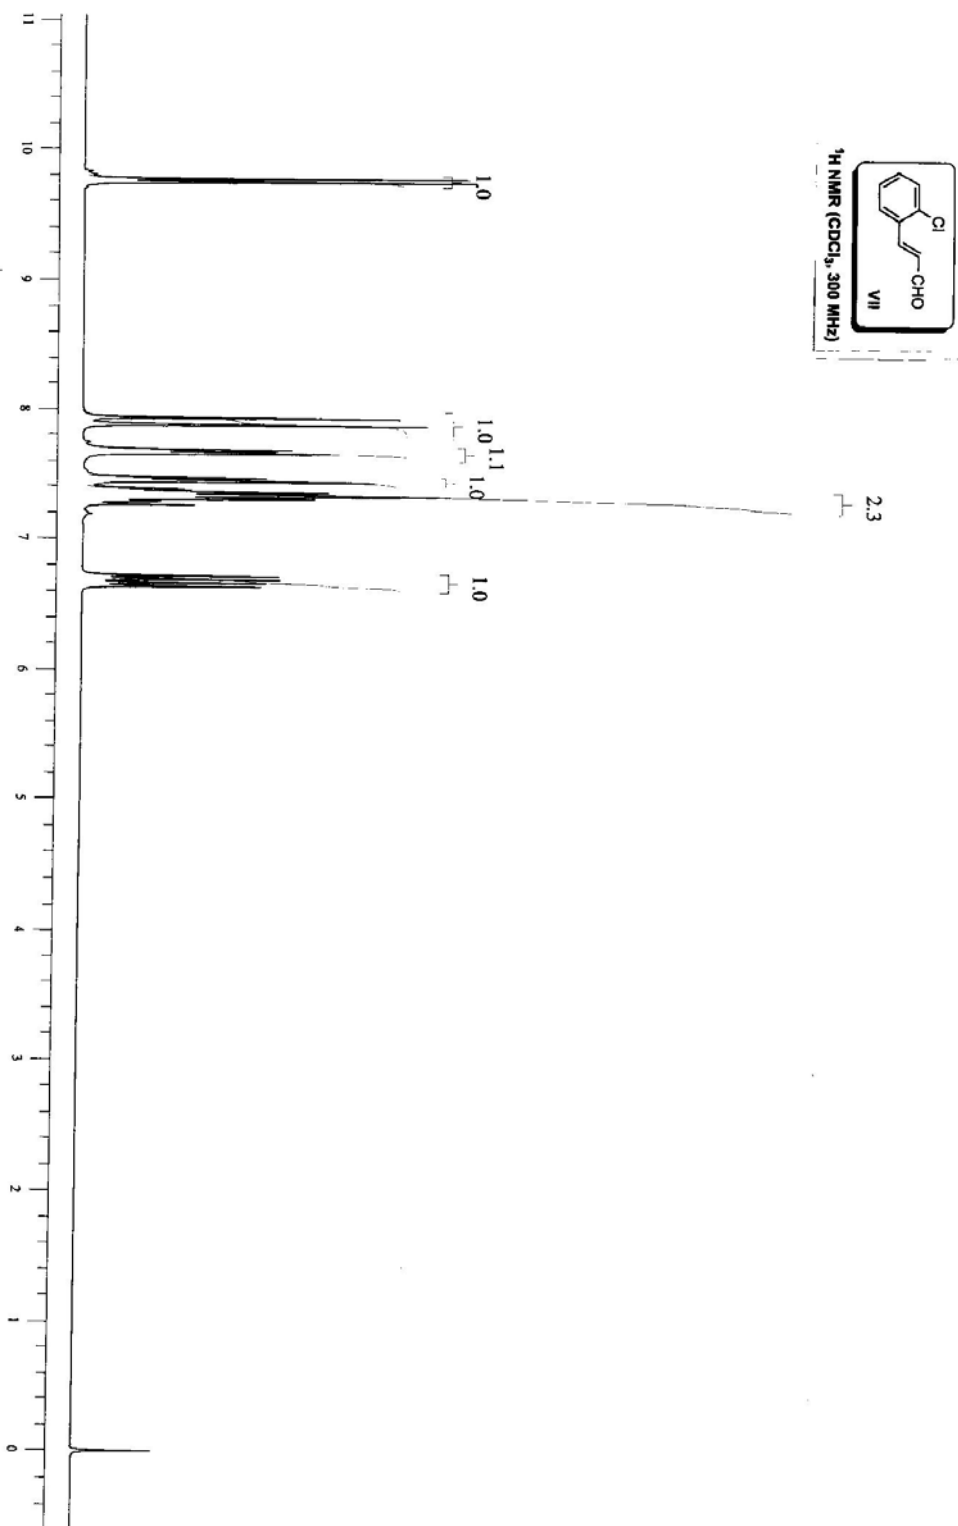

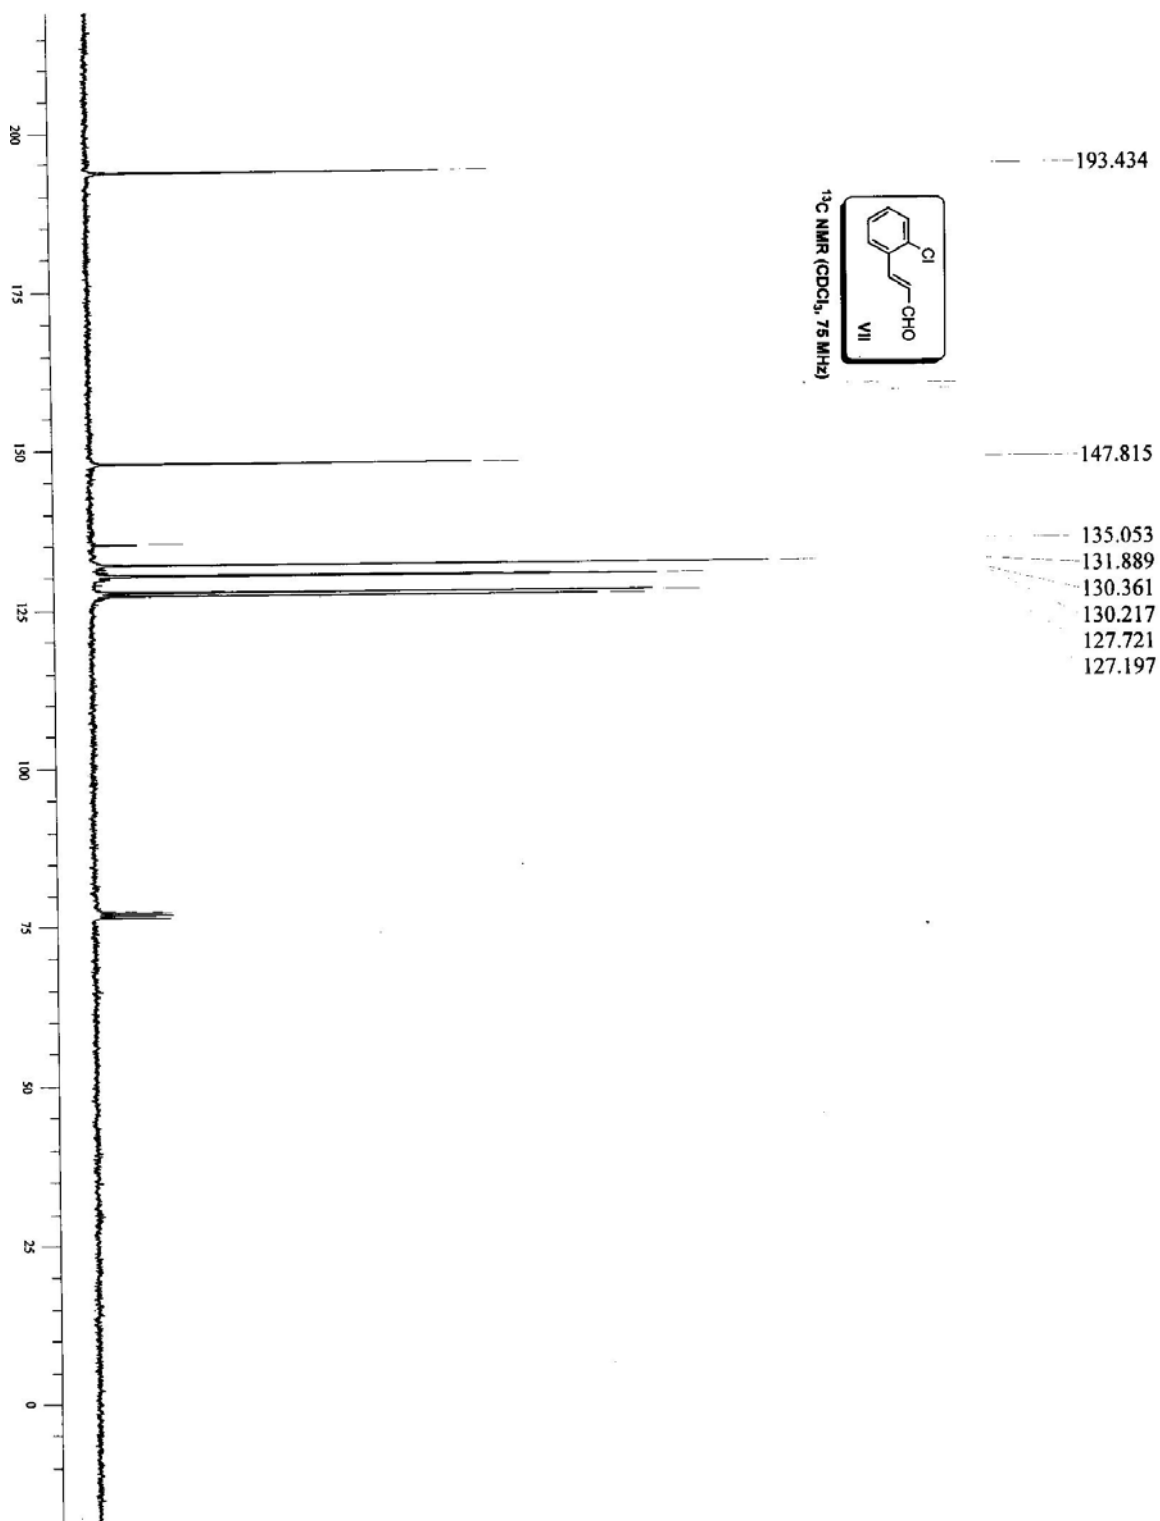

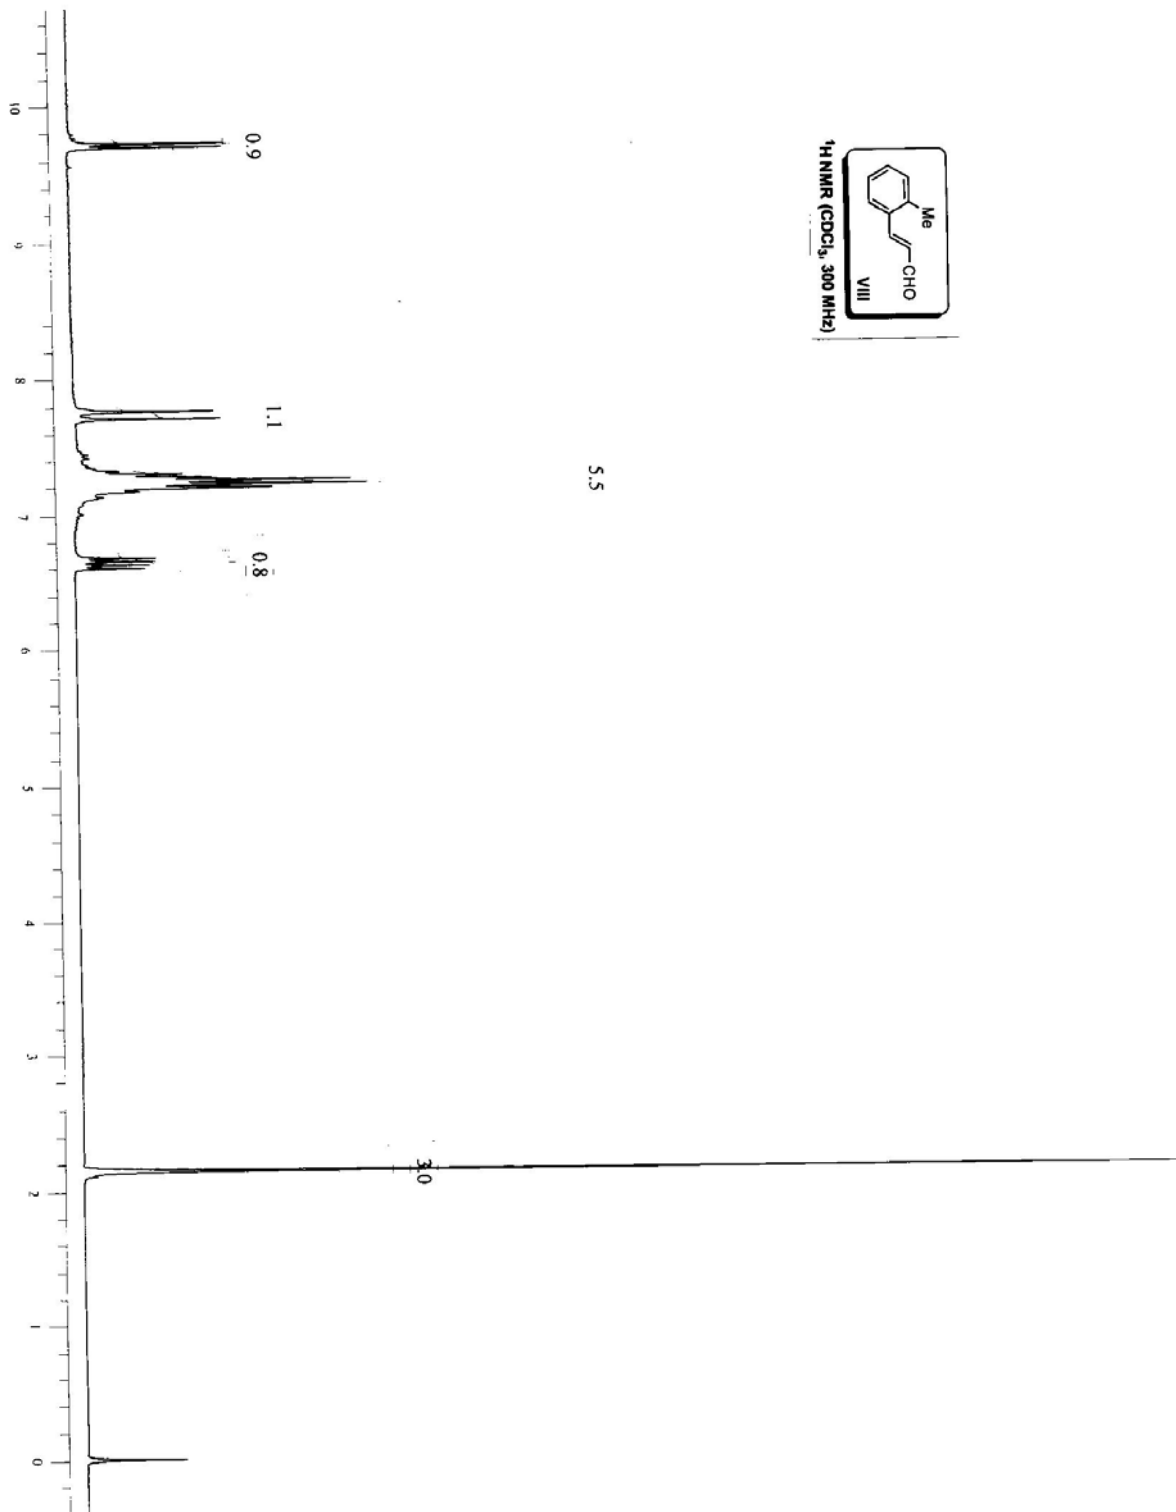

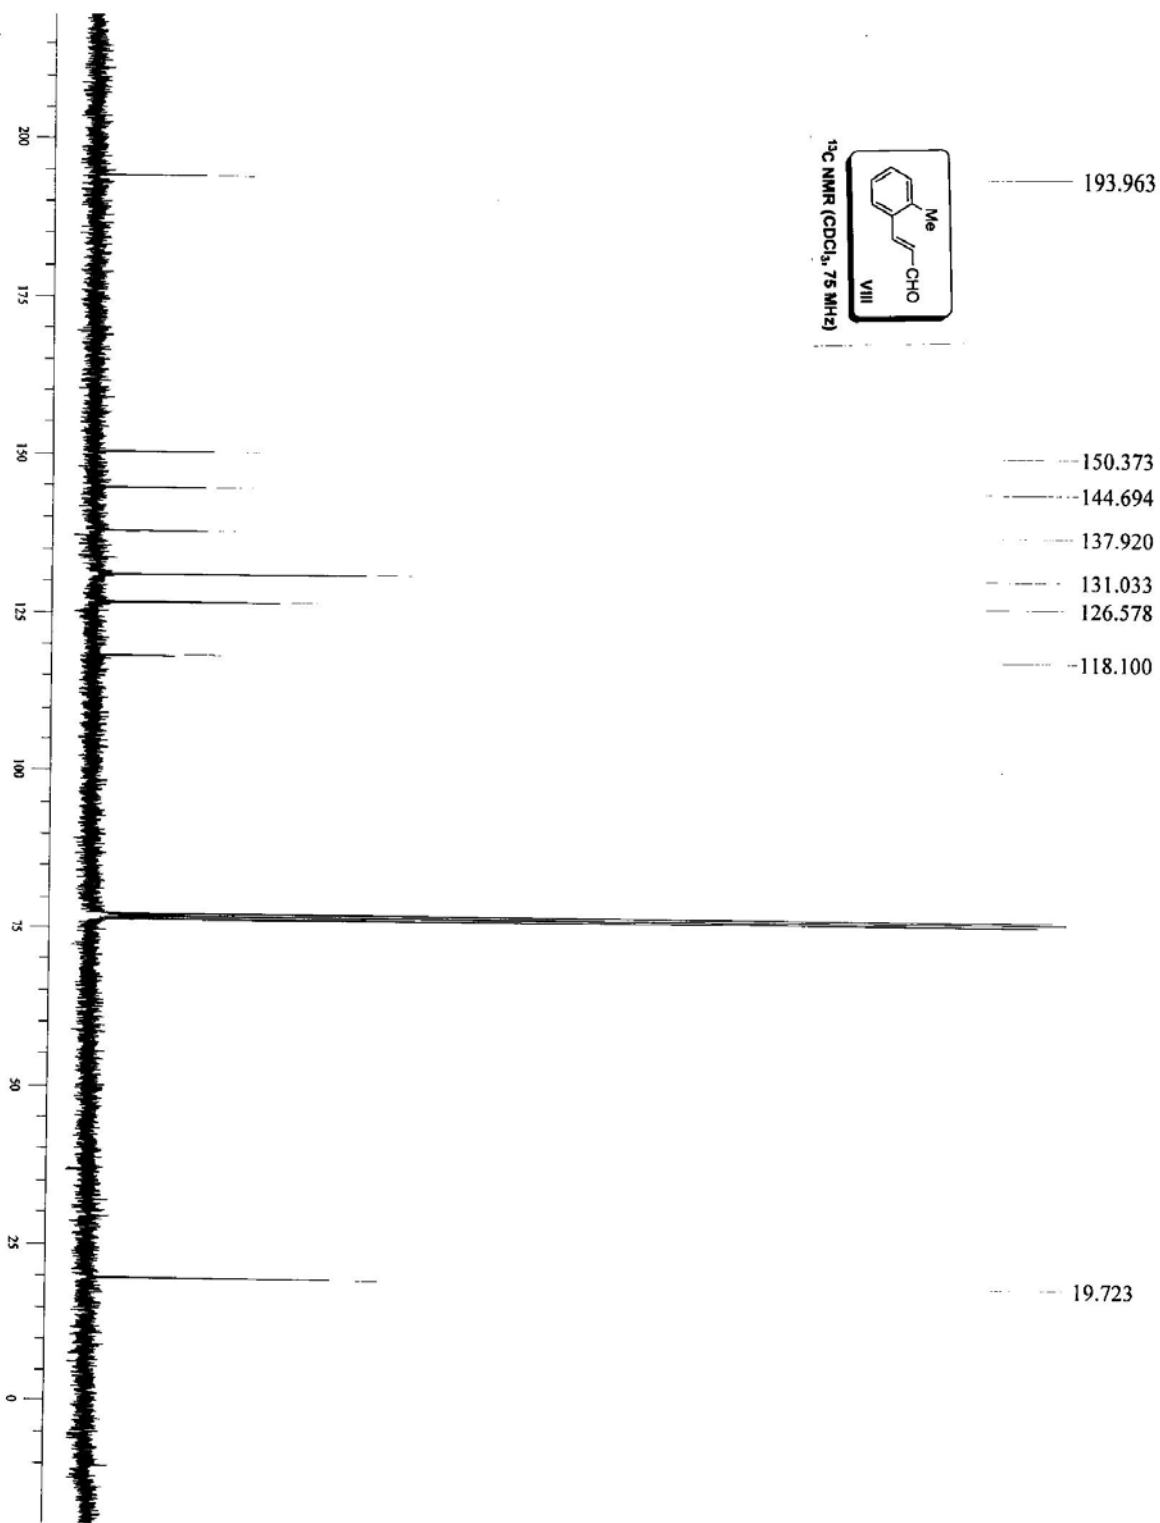

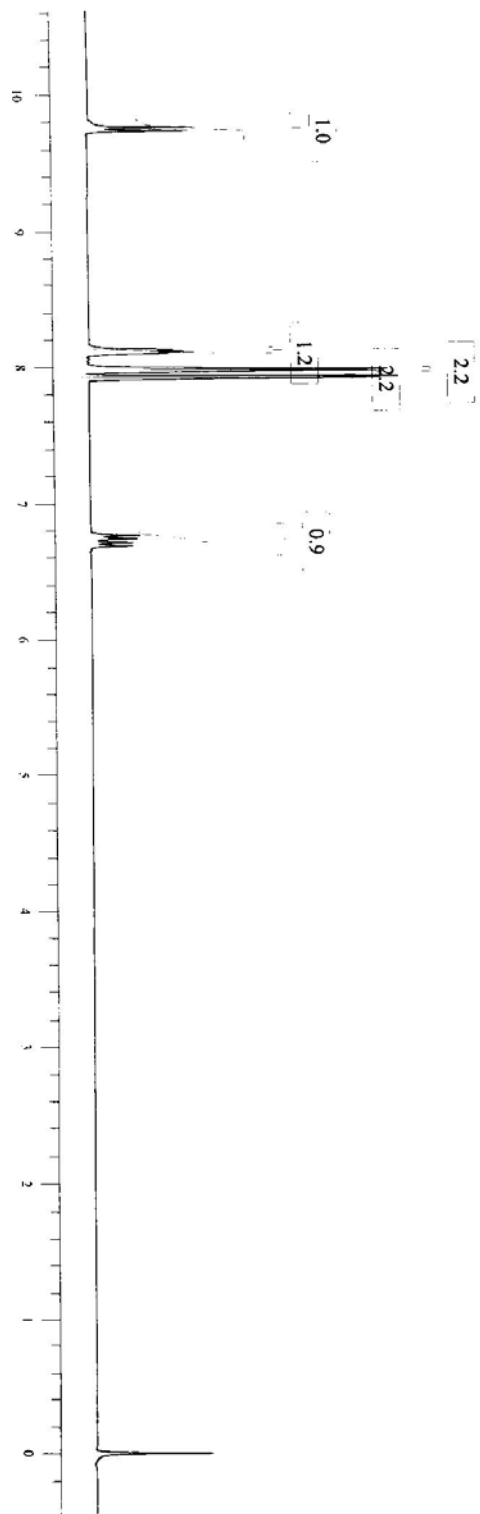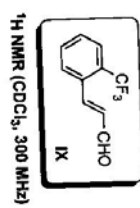

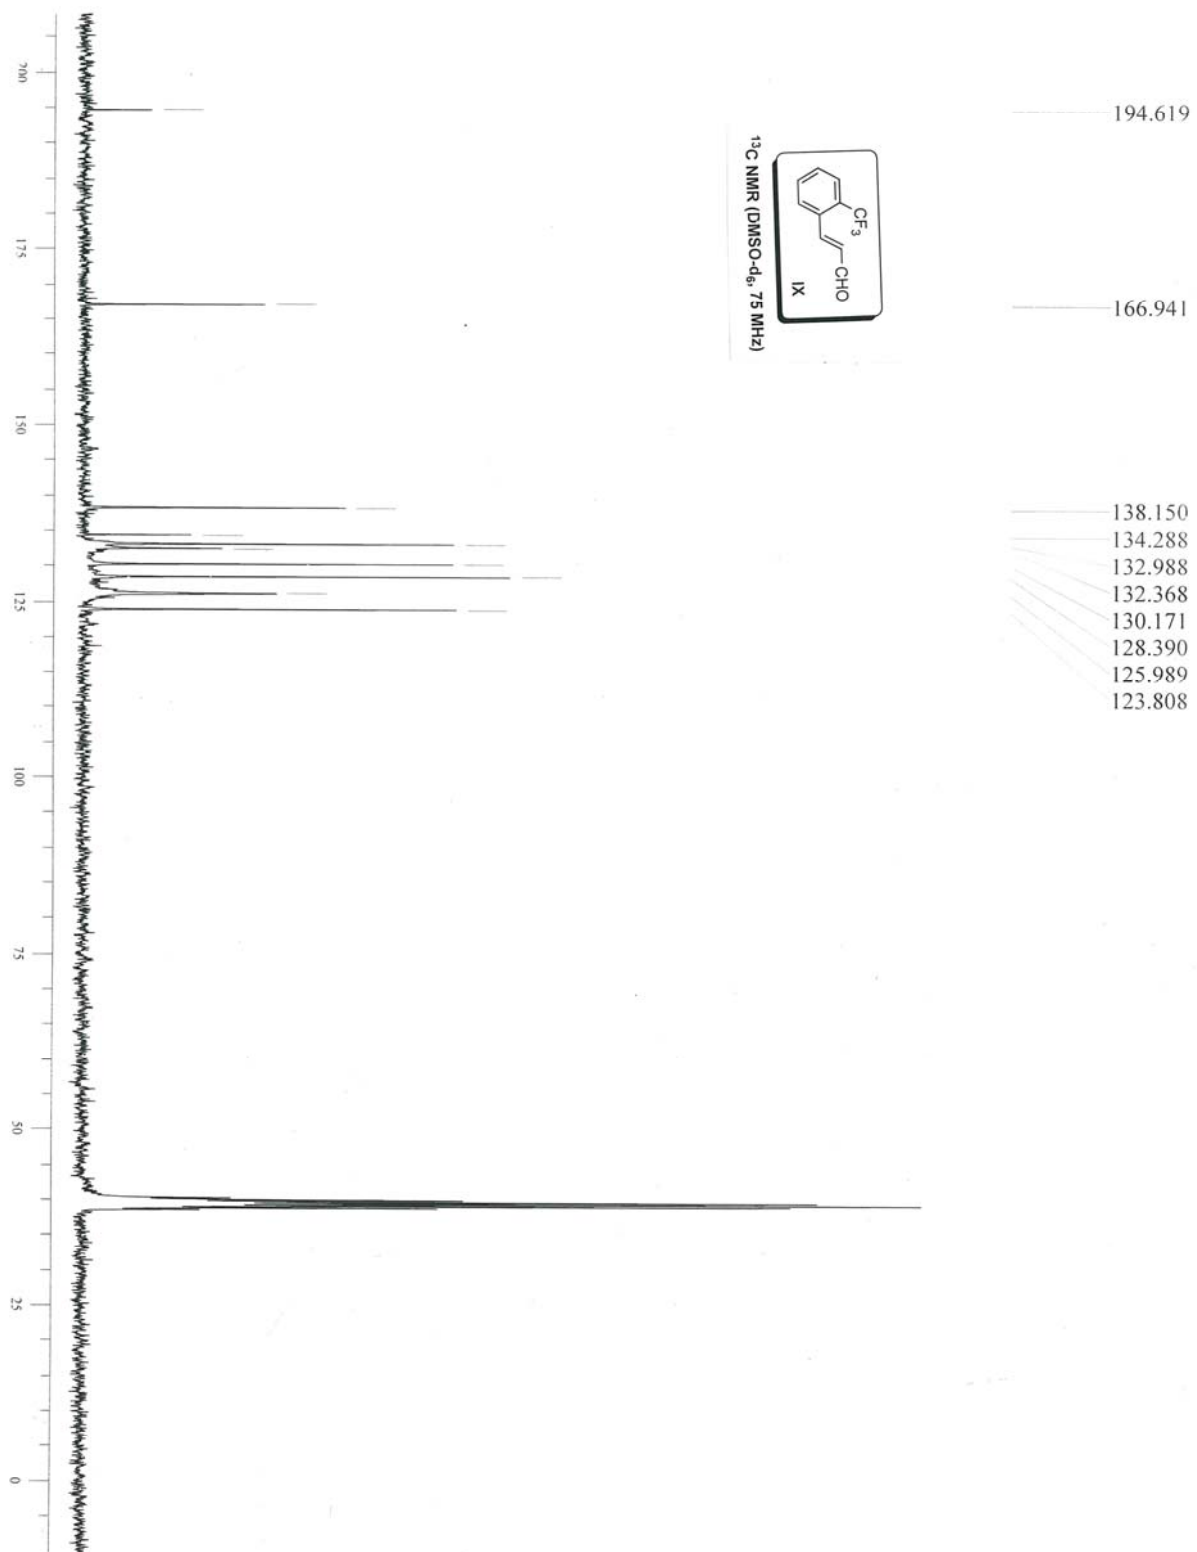

S.2

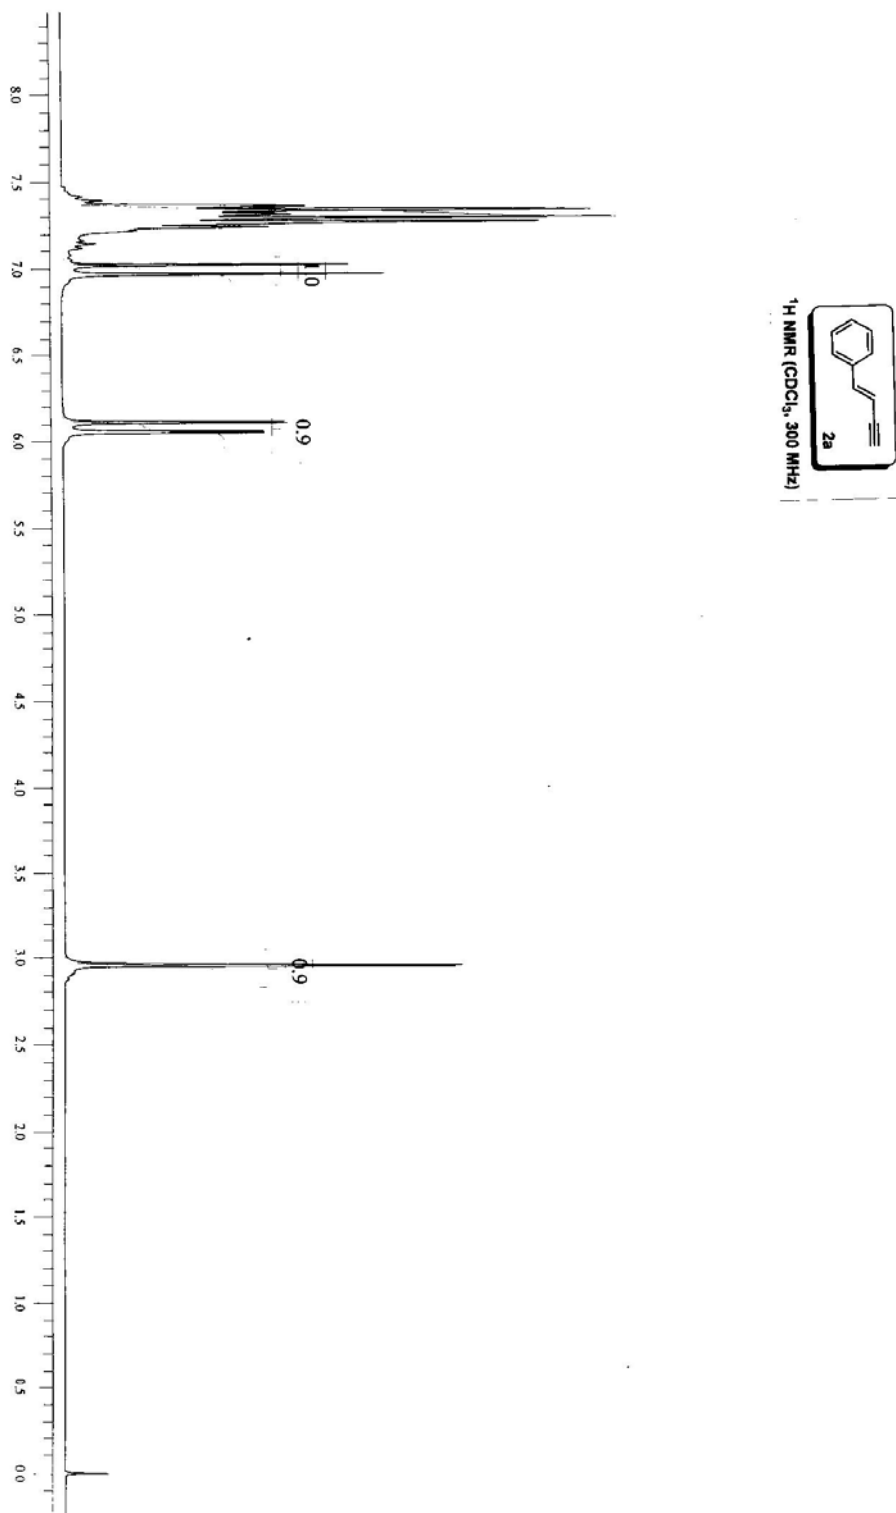

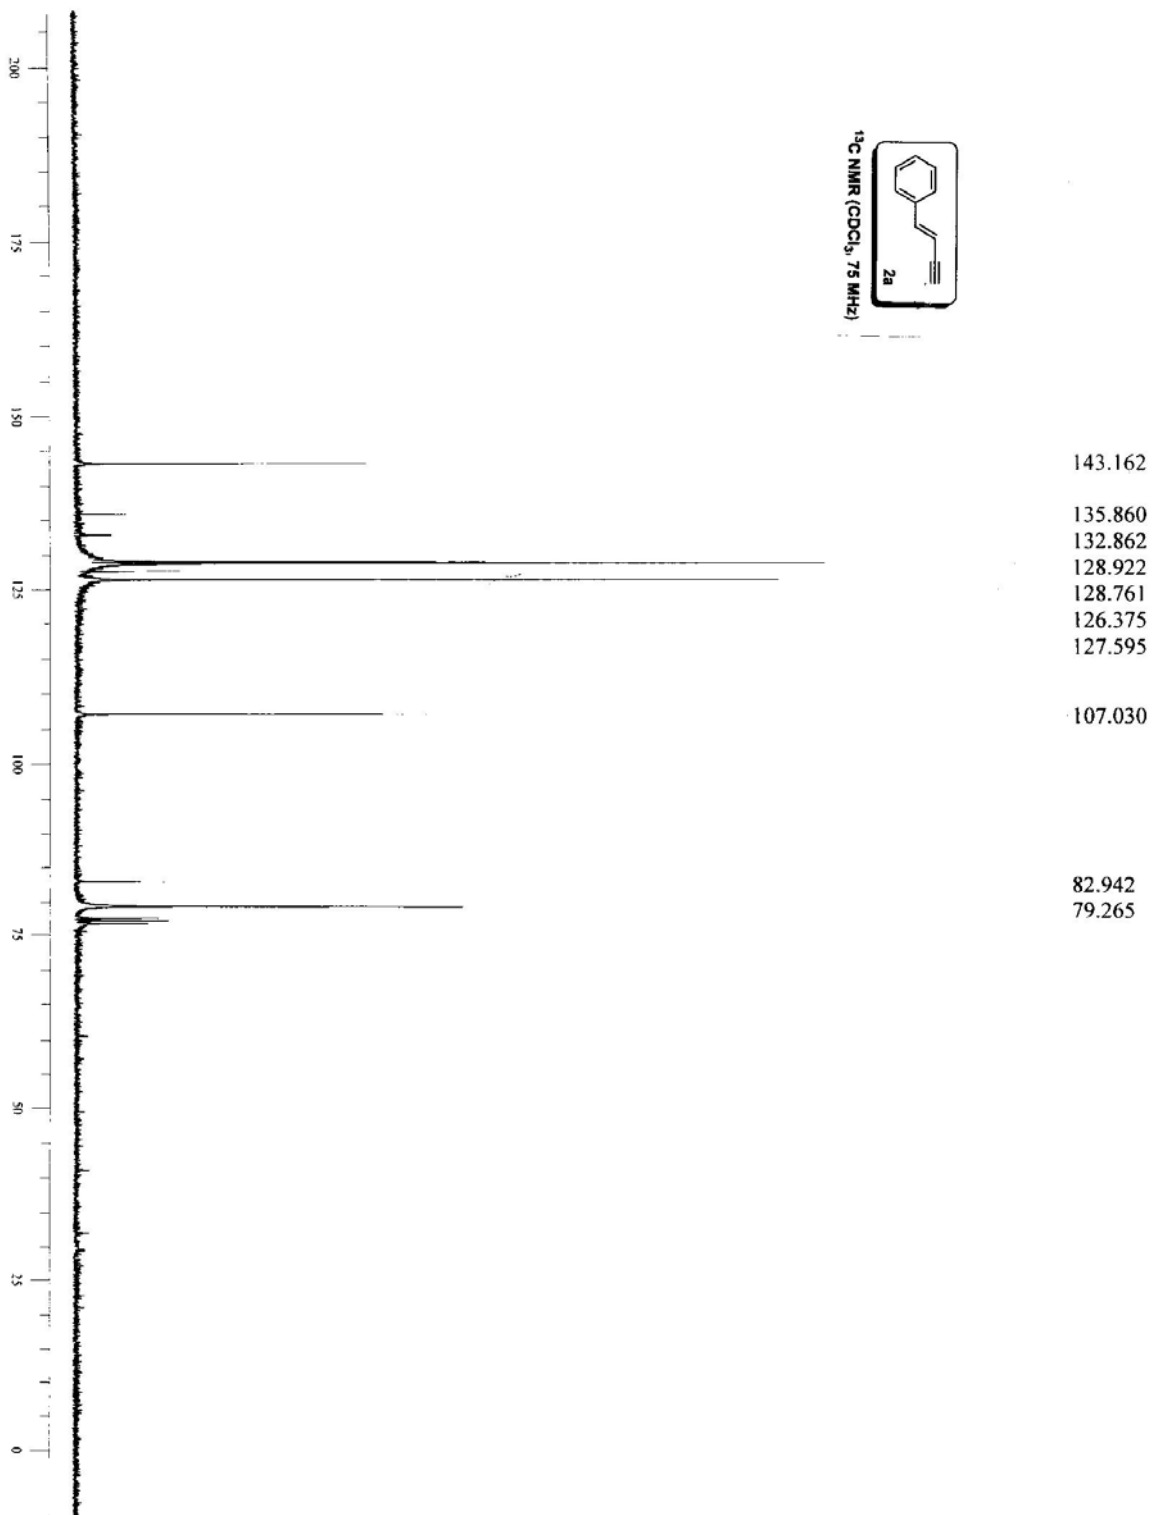



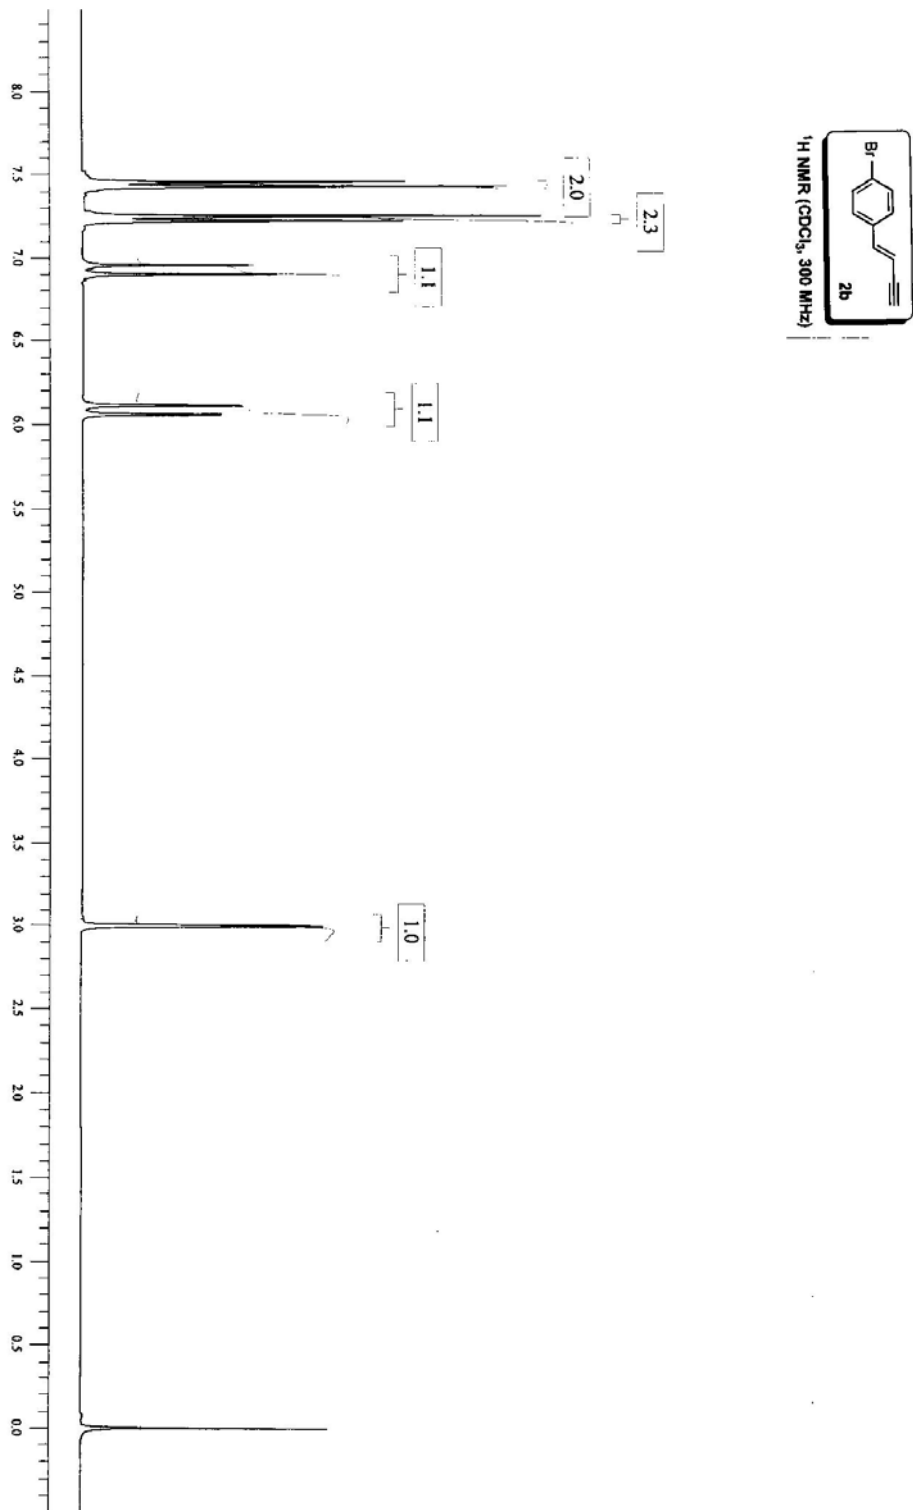

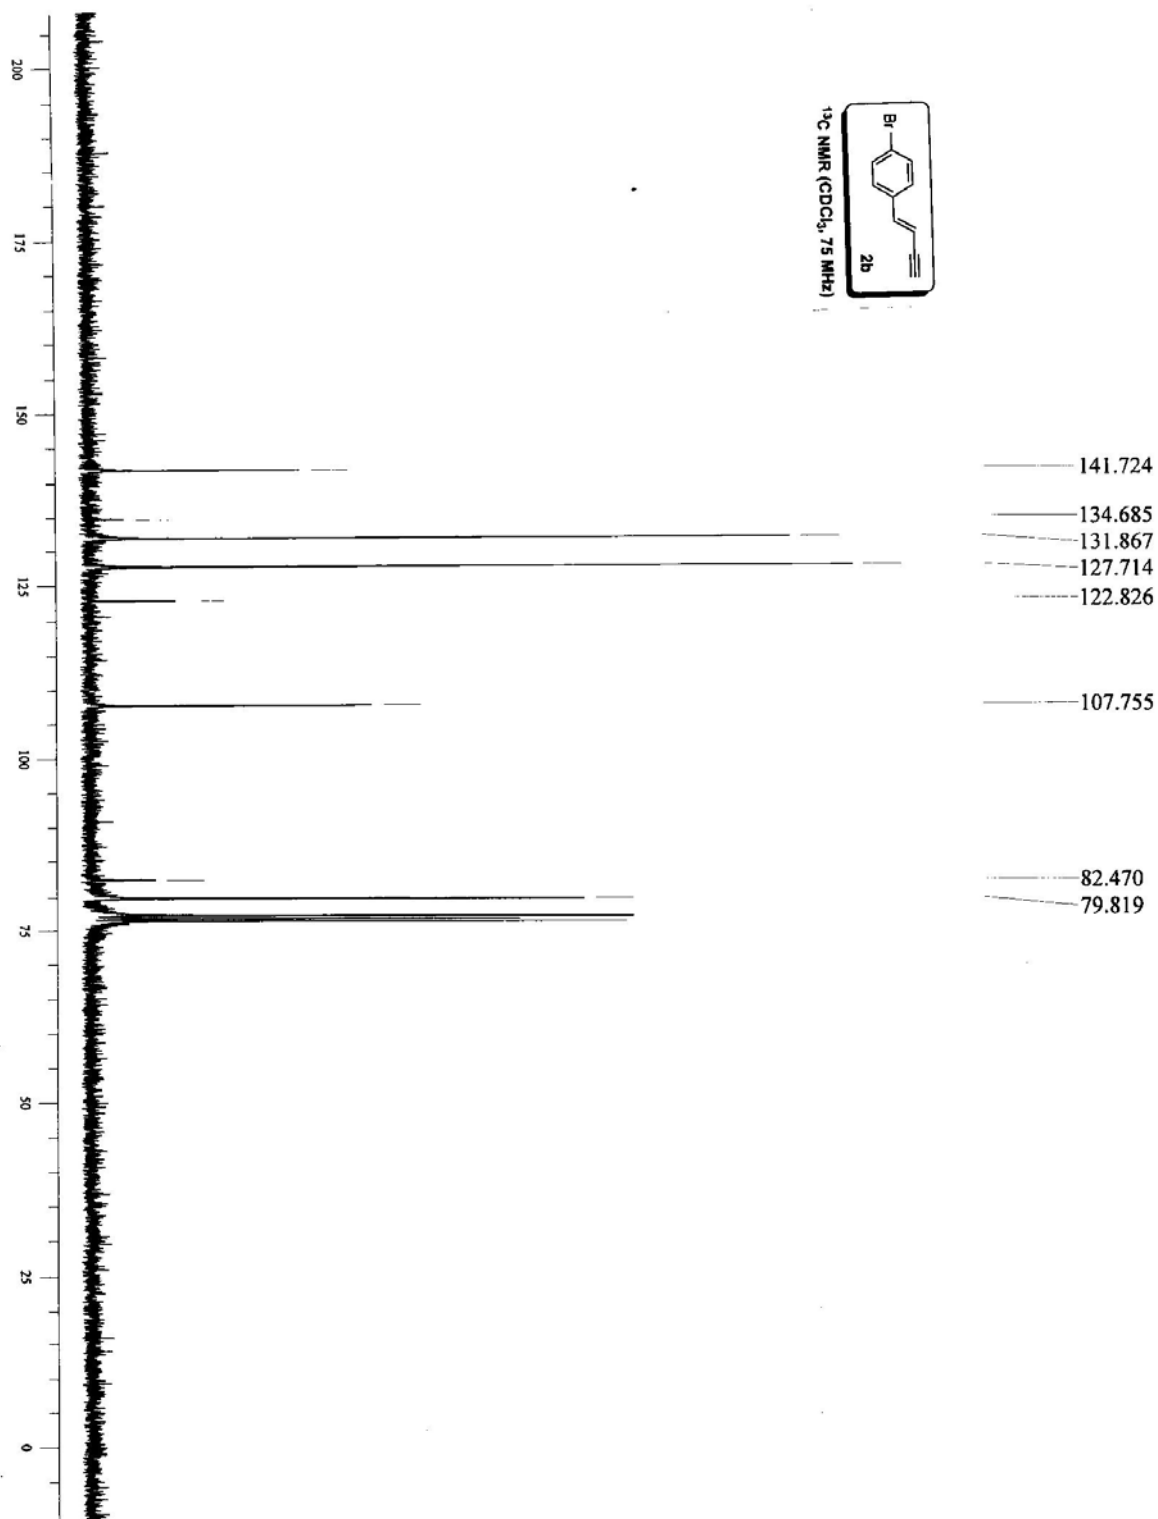

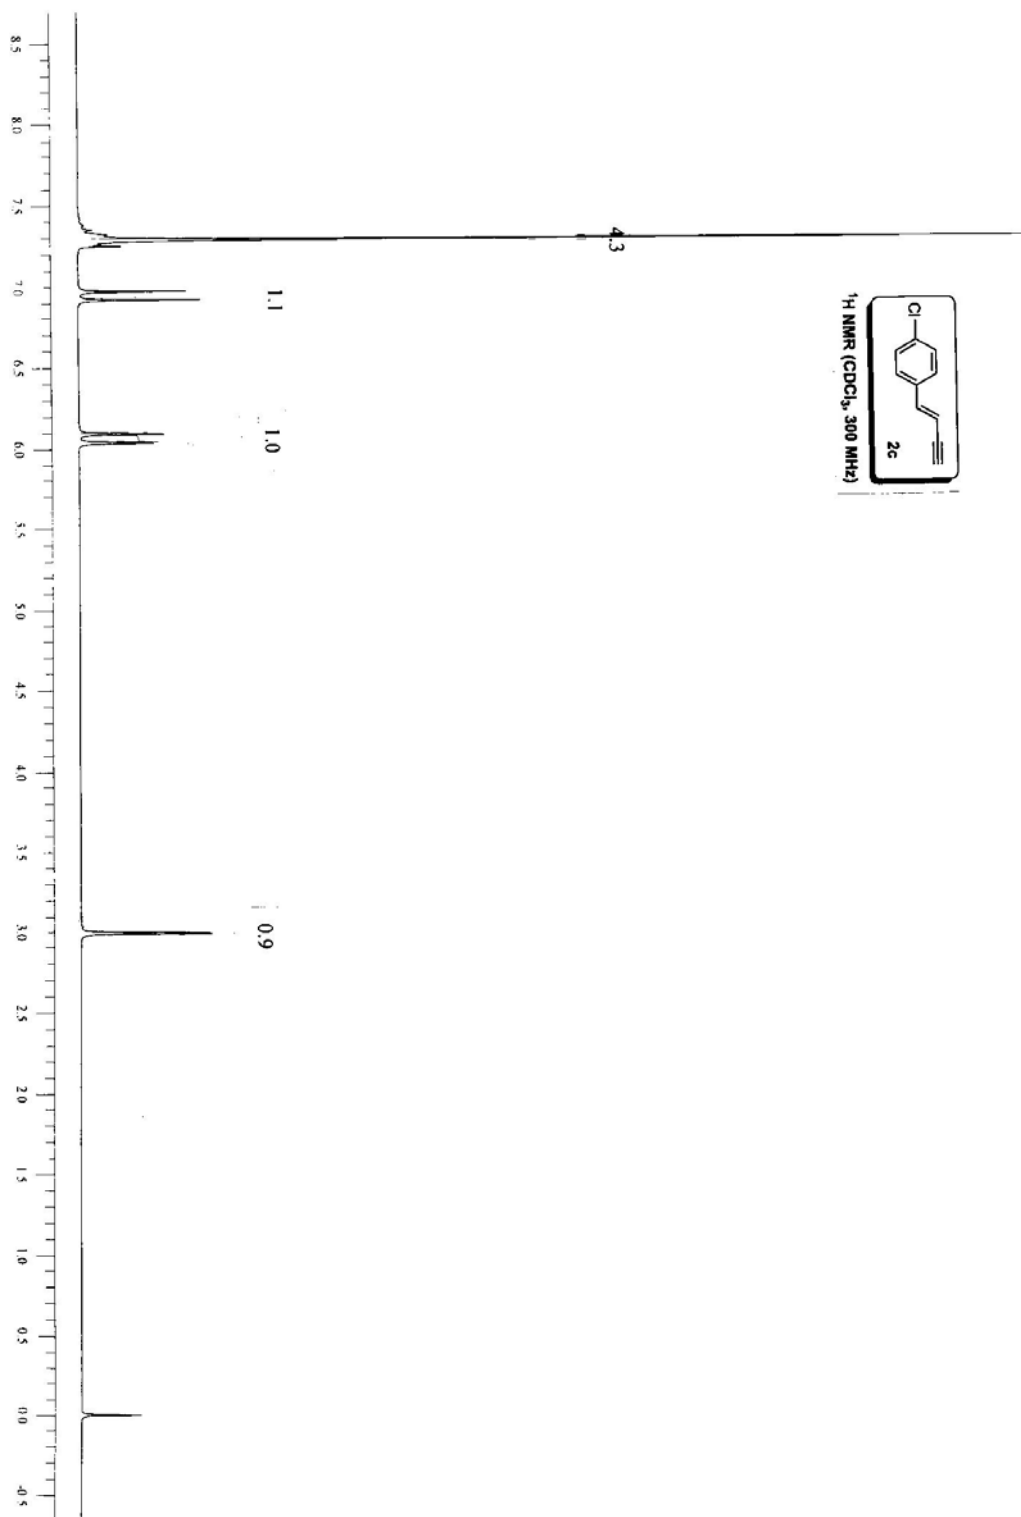

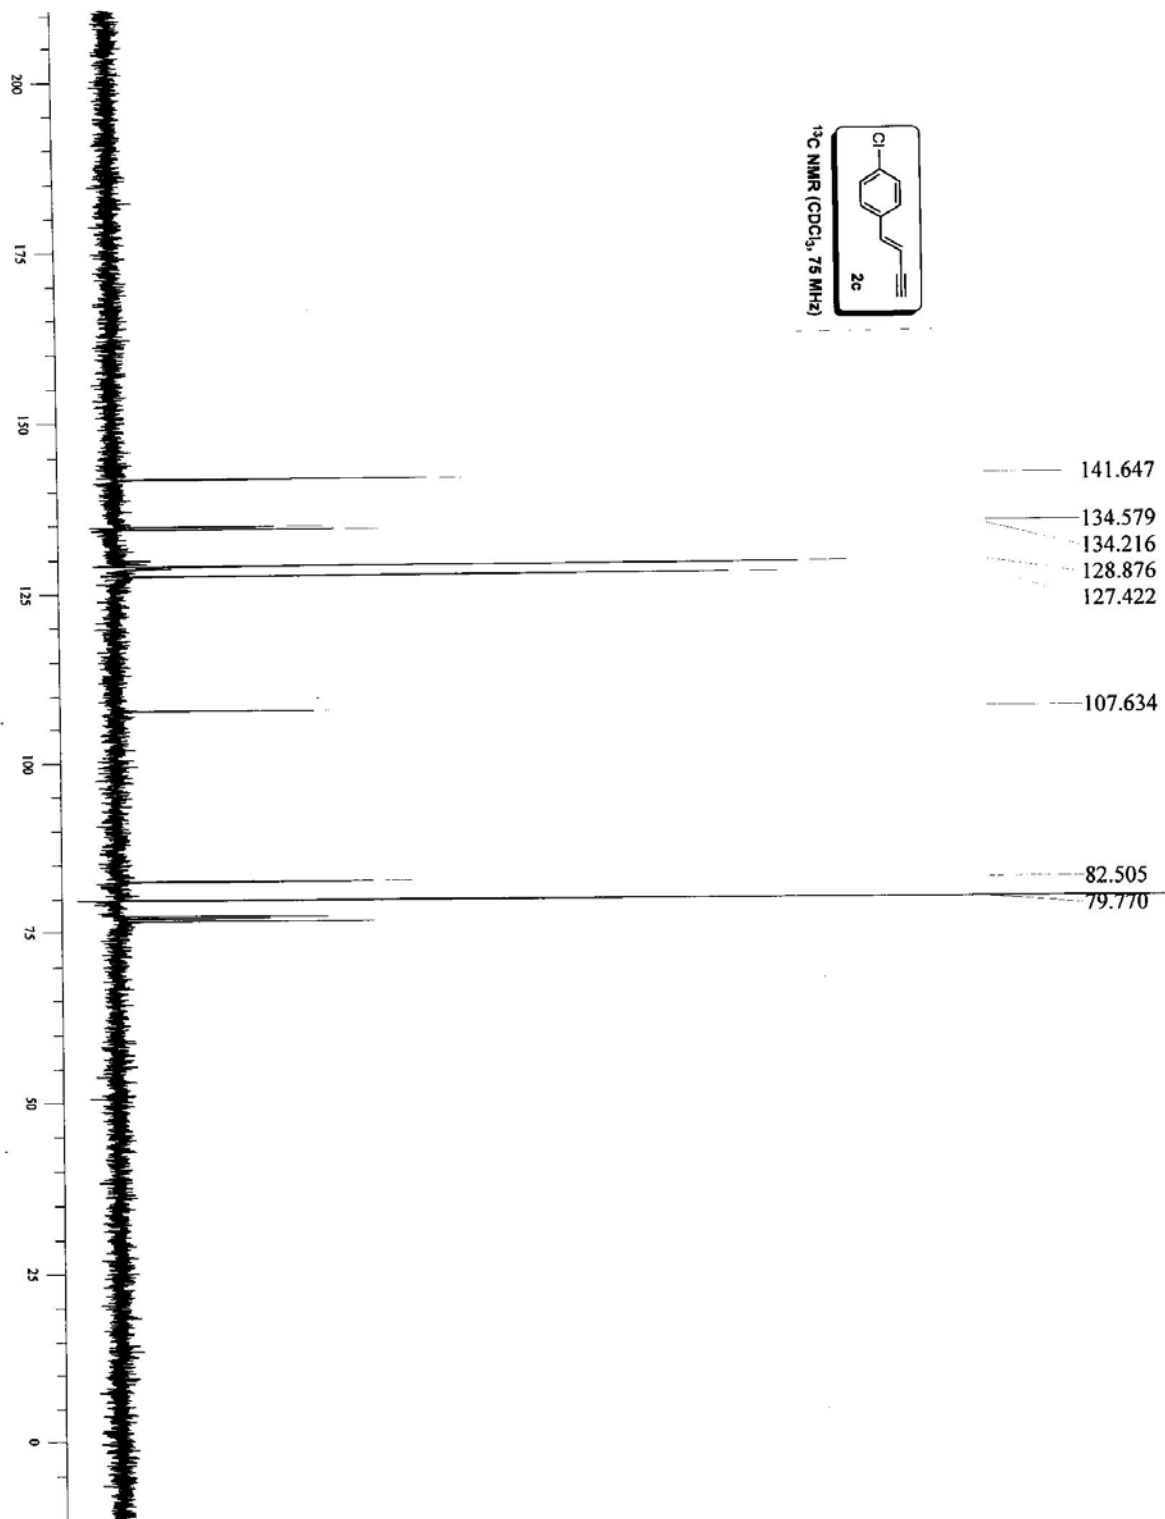

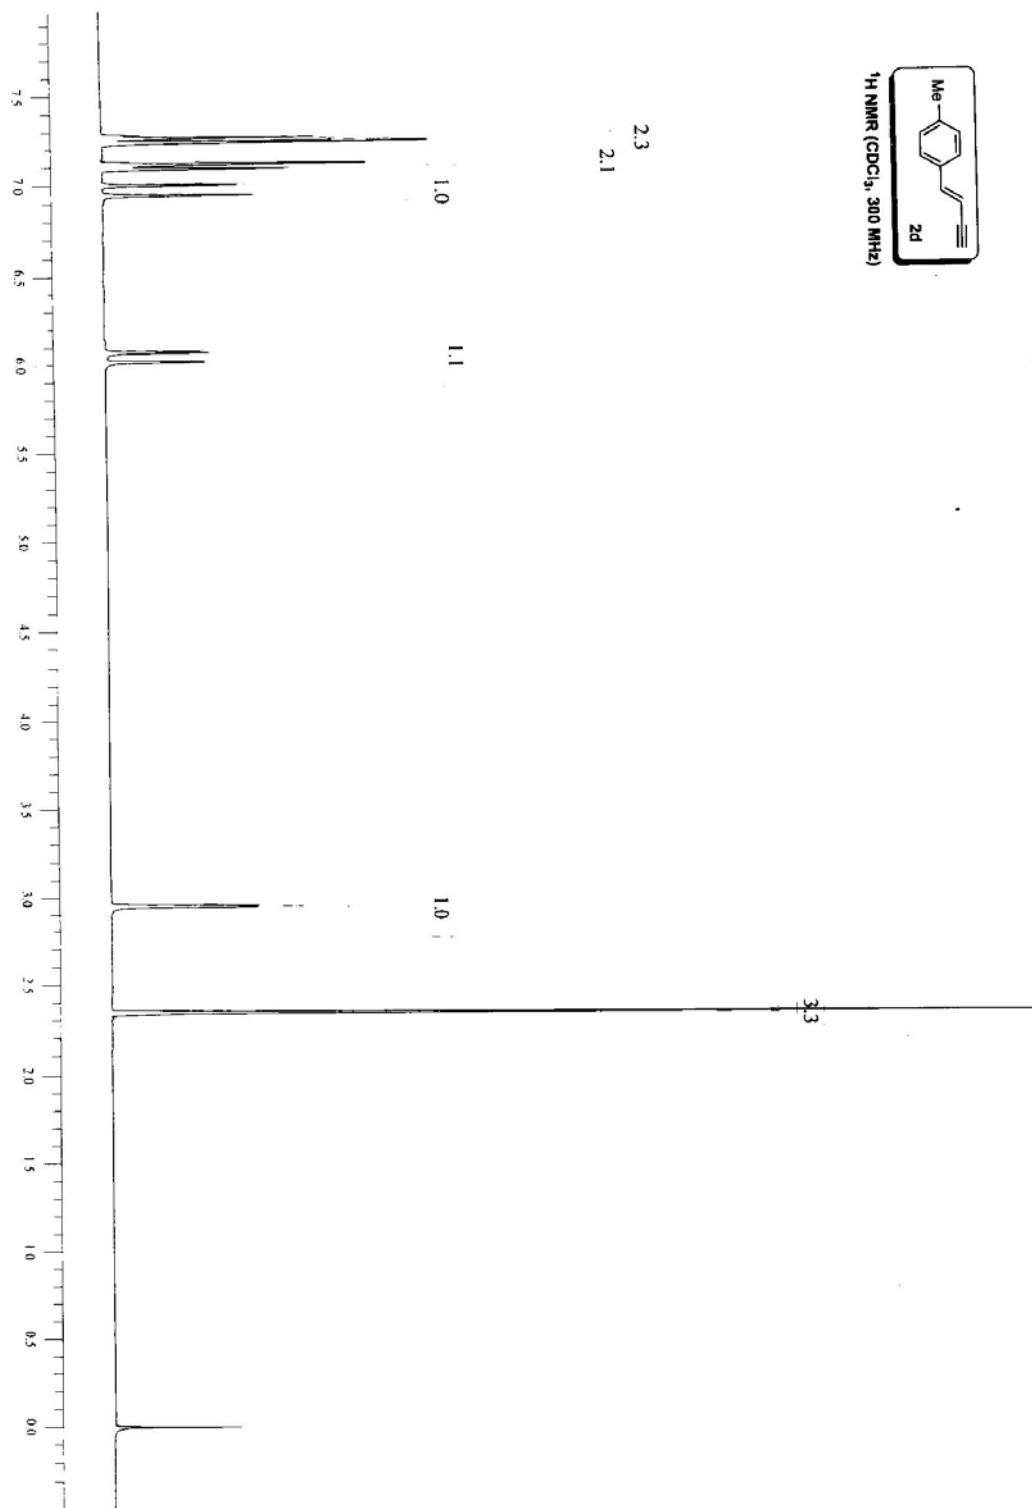

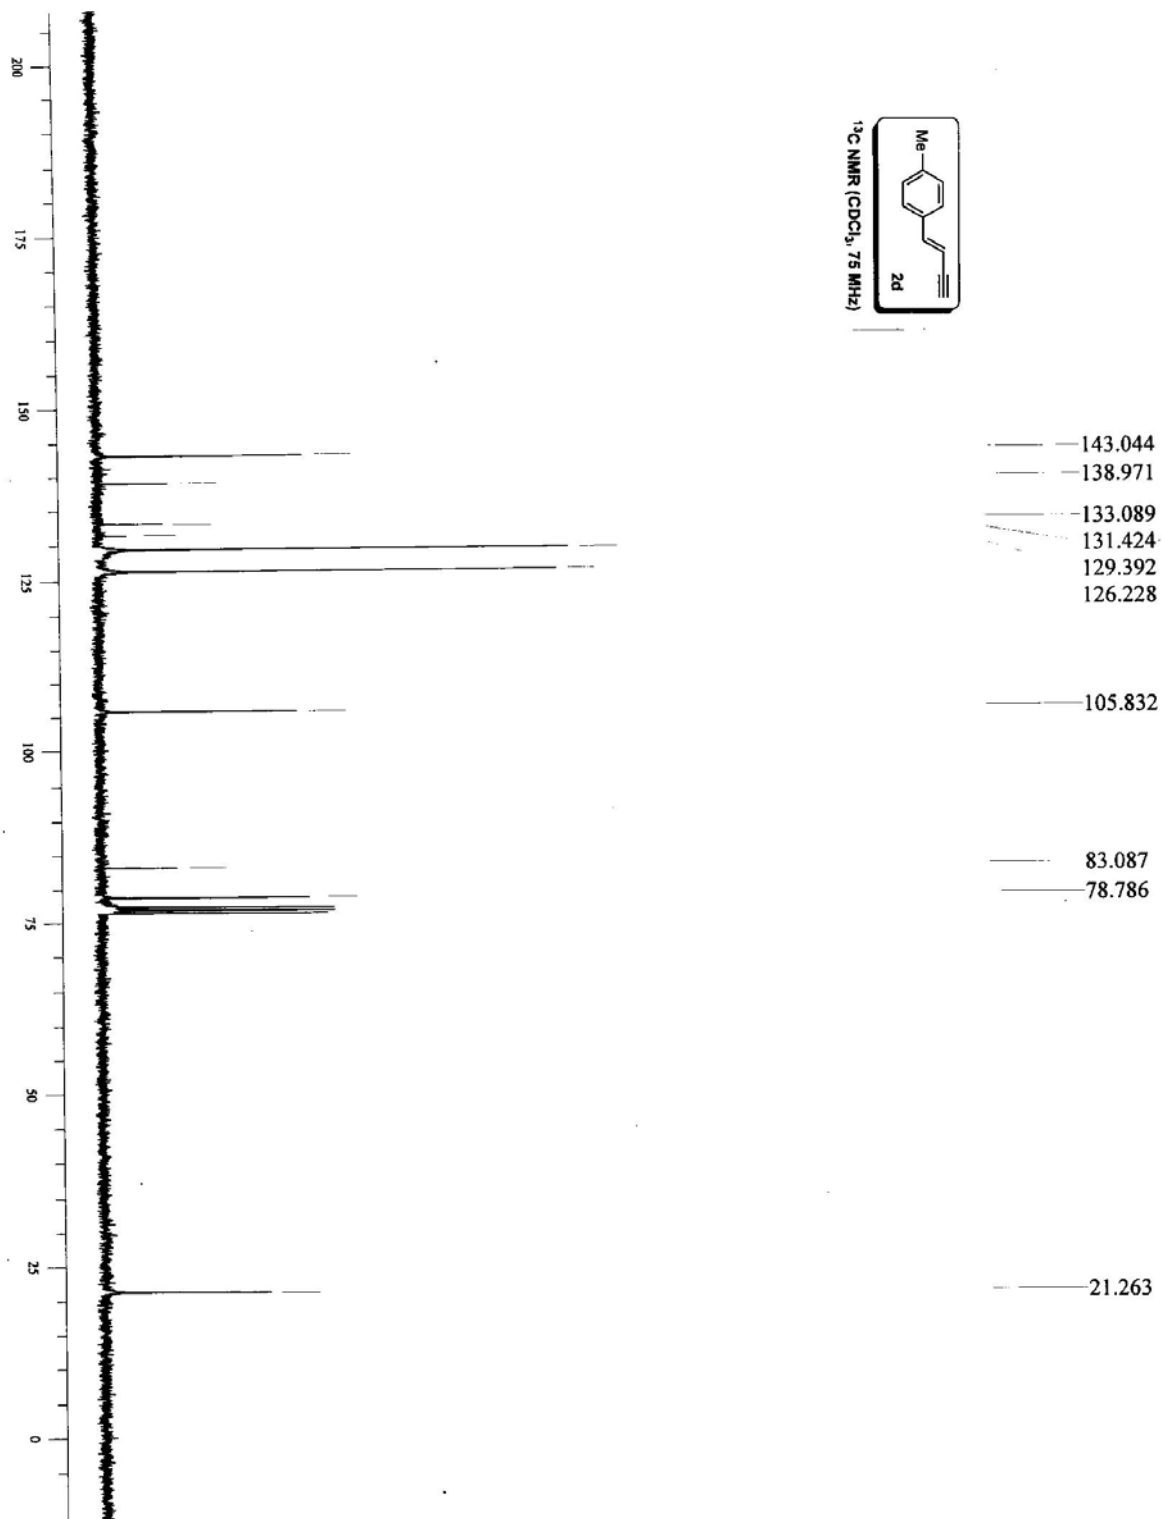

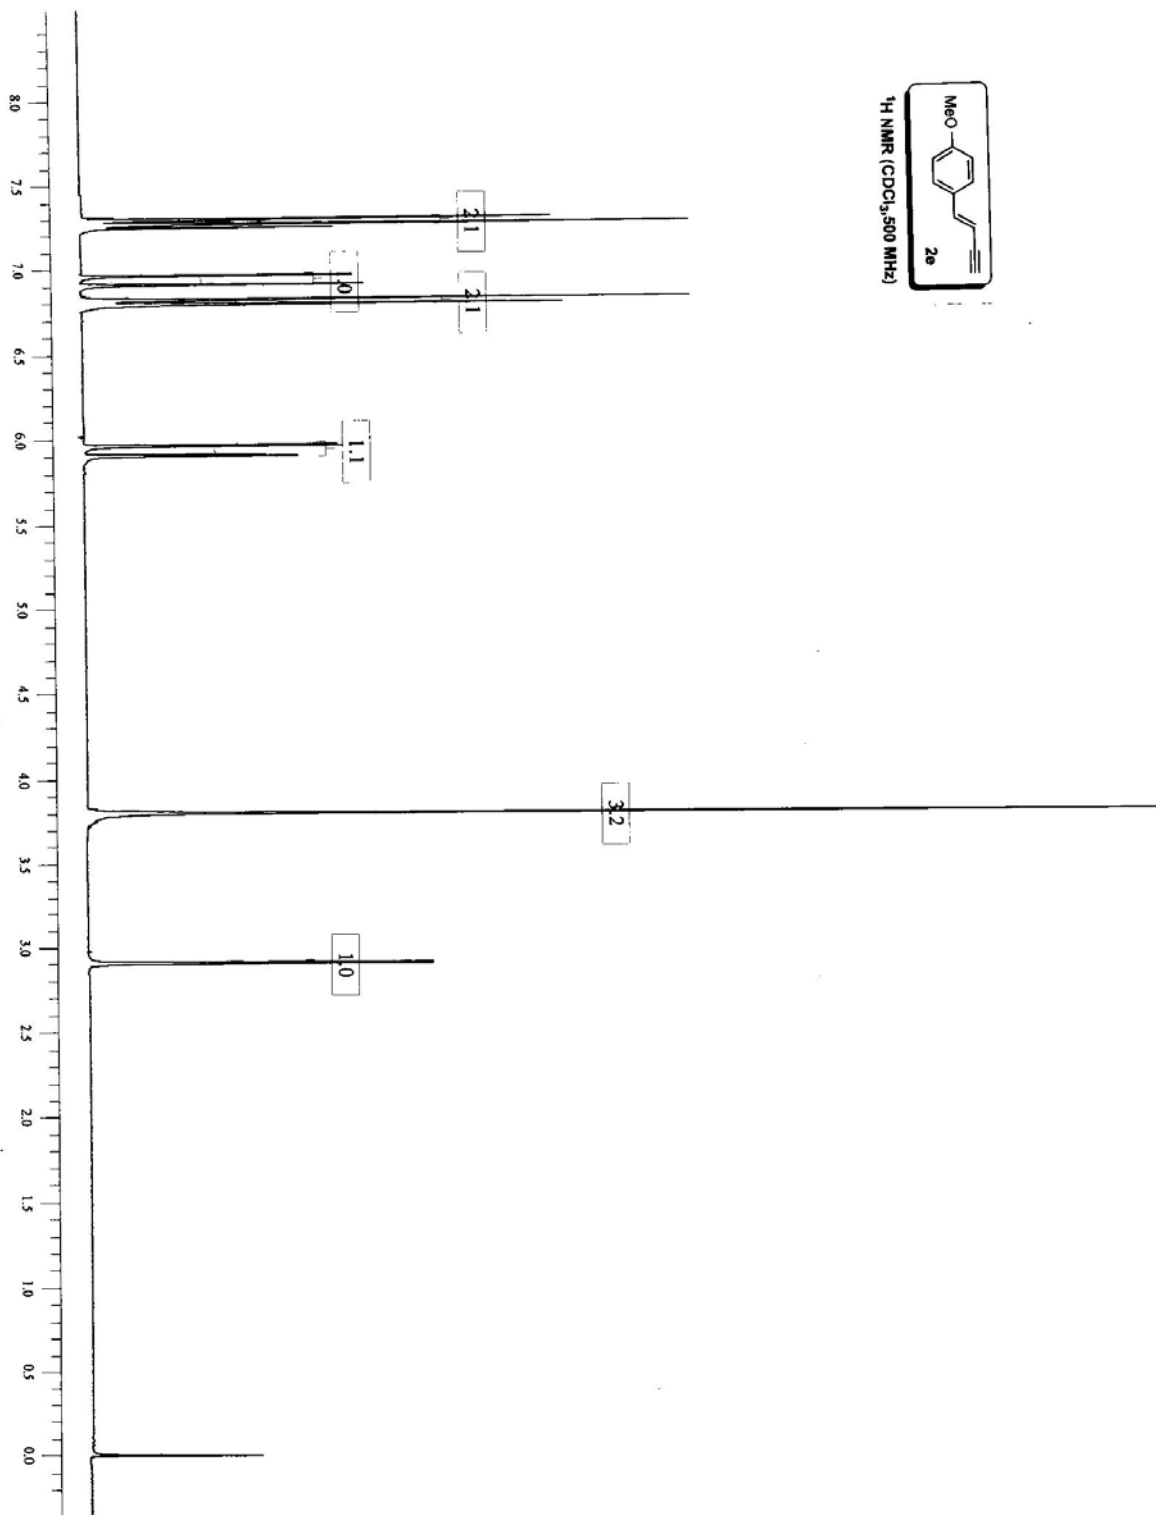

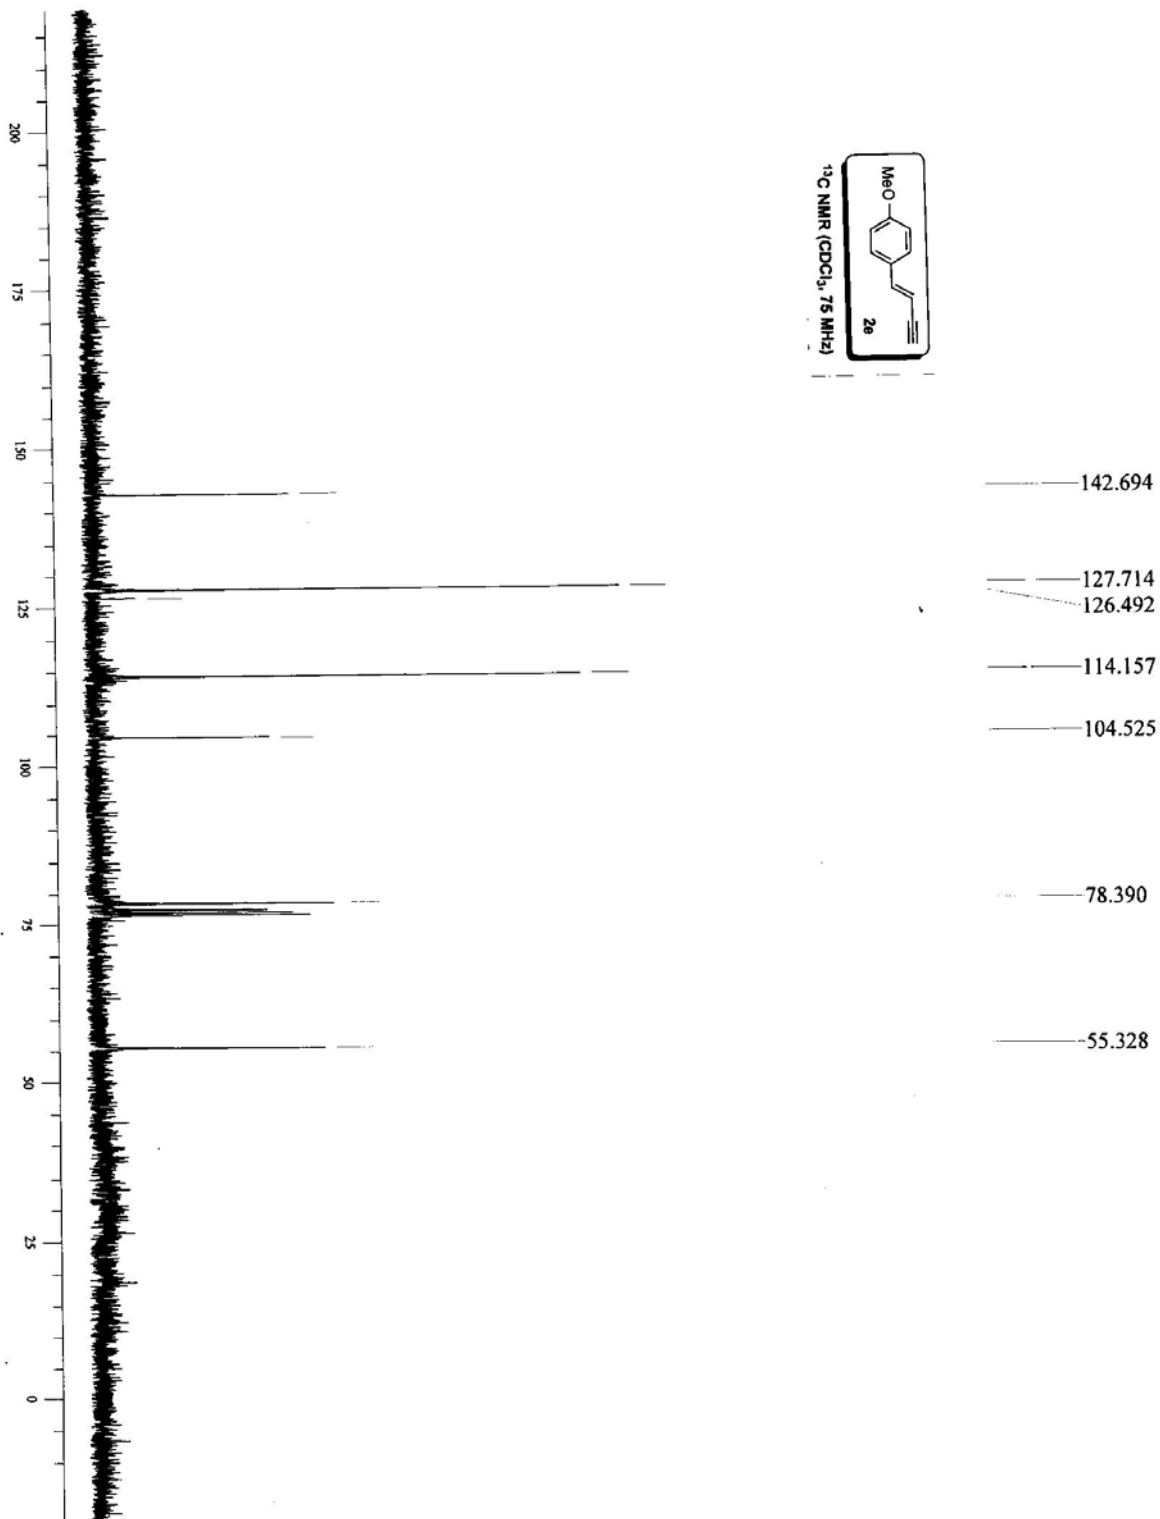



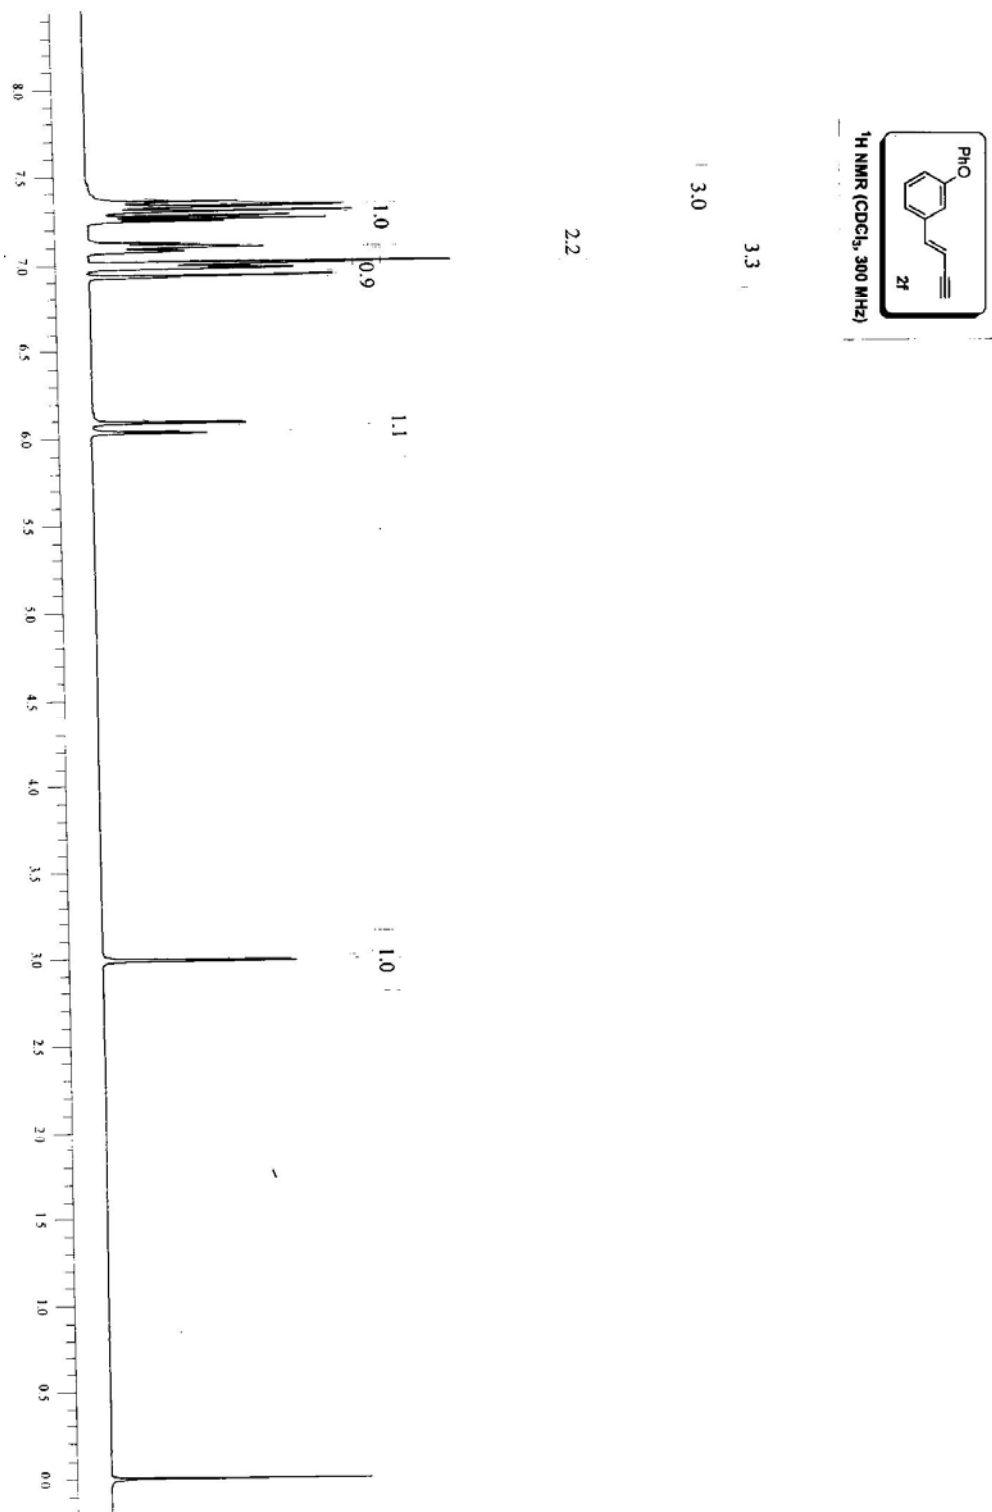

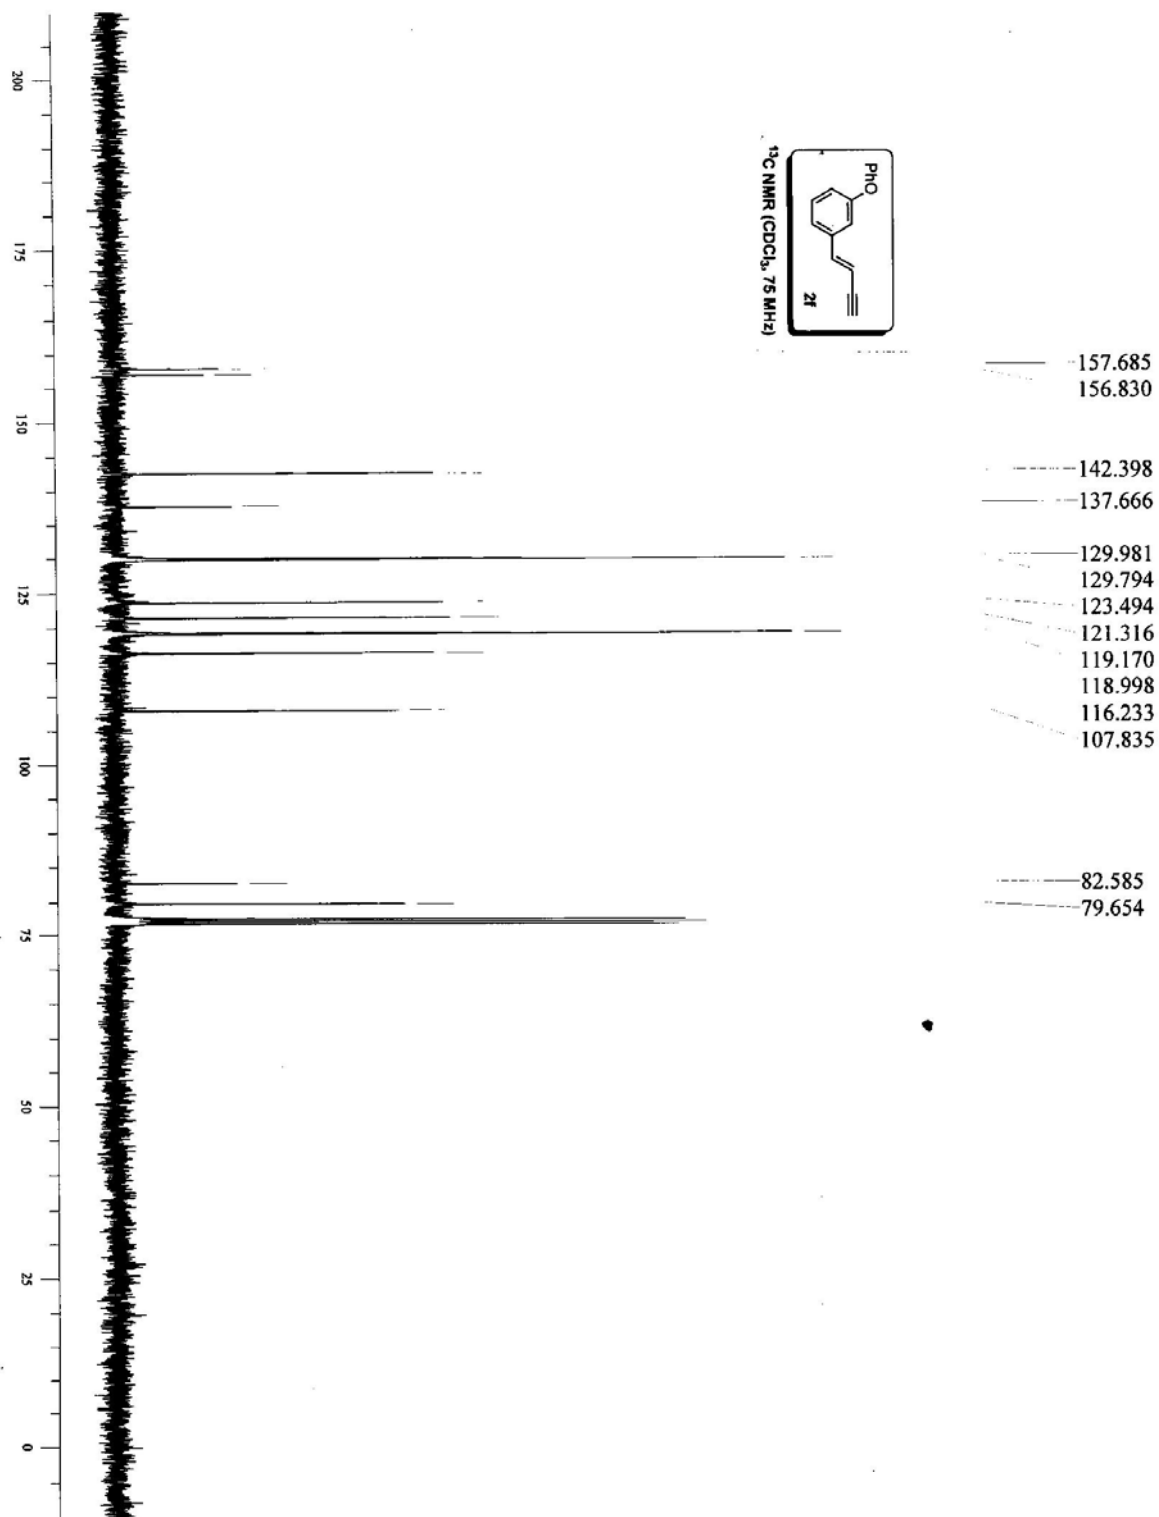

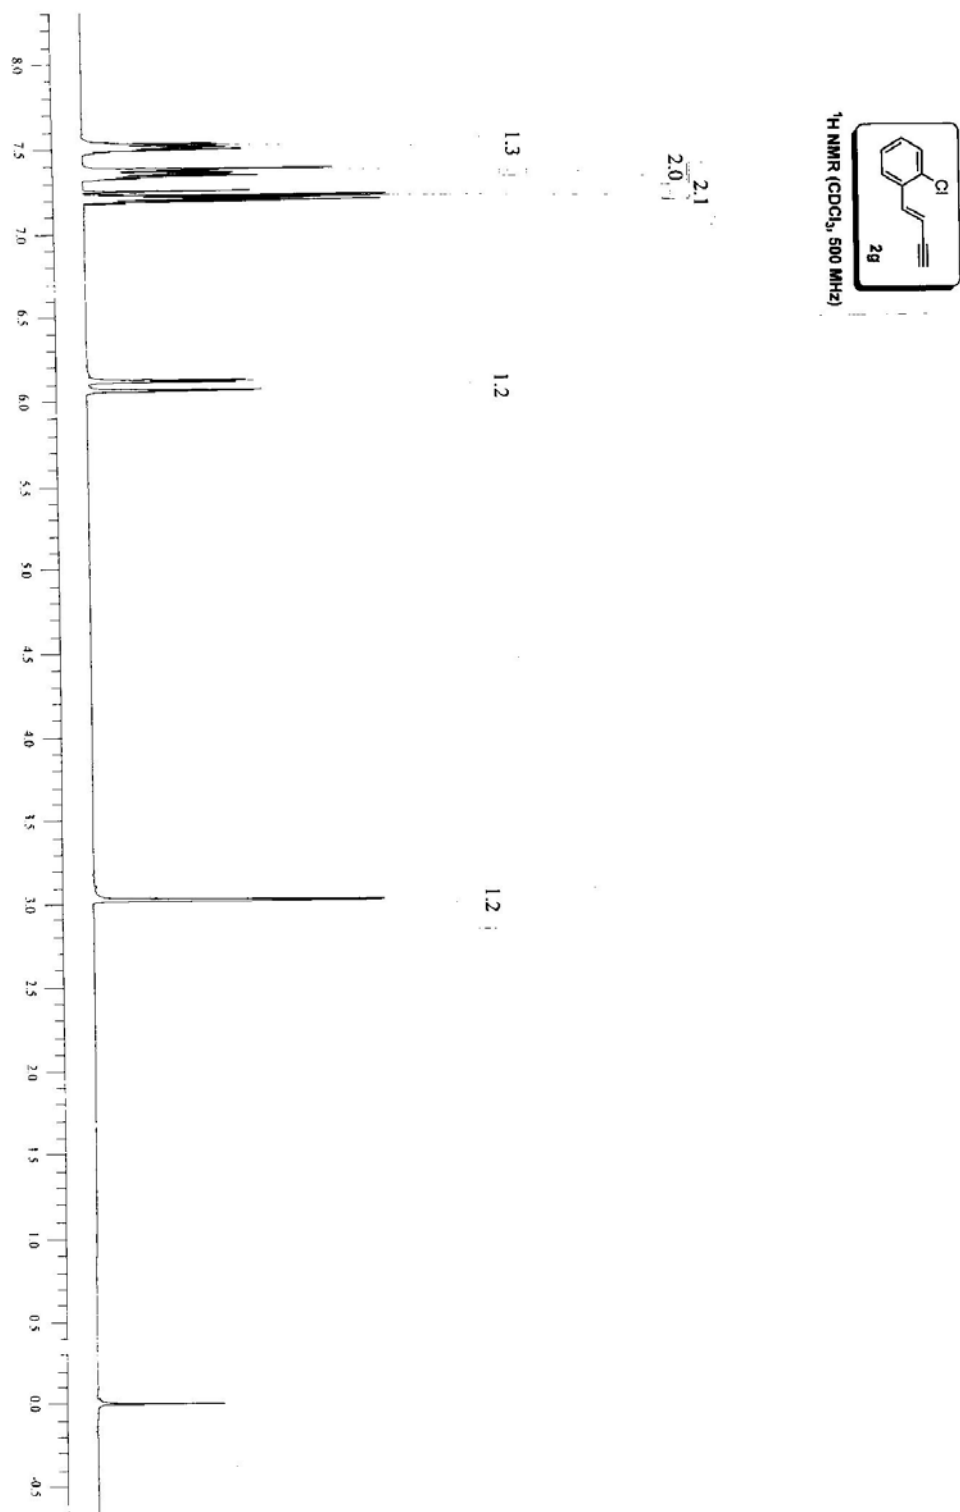

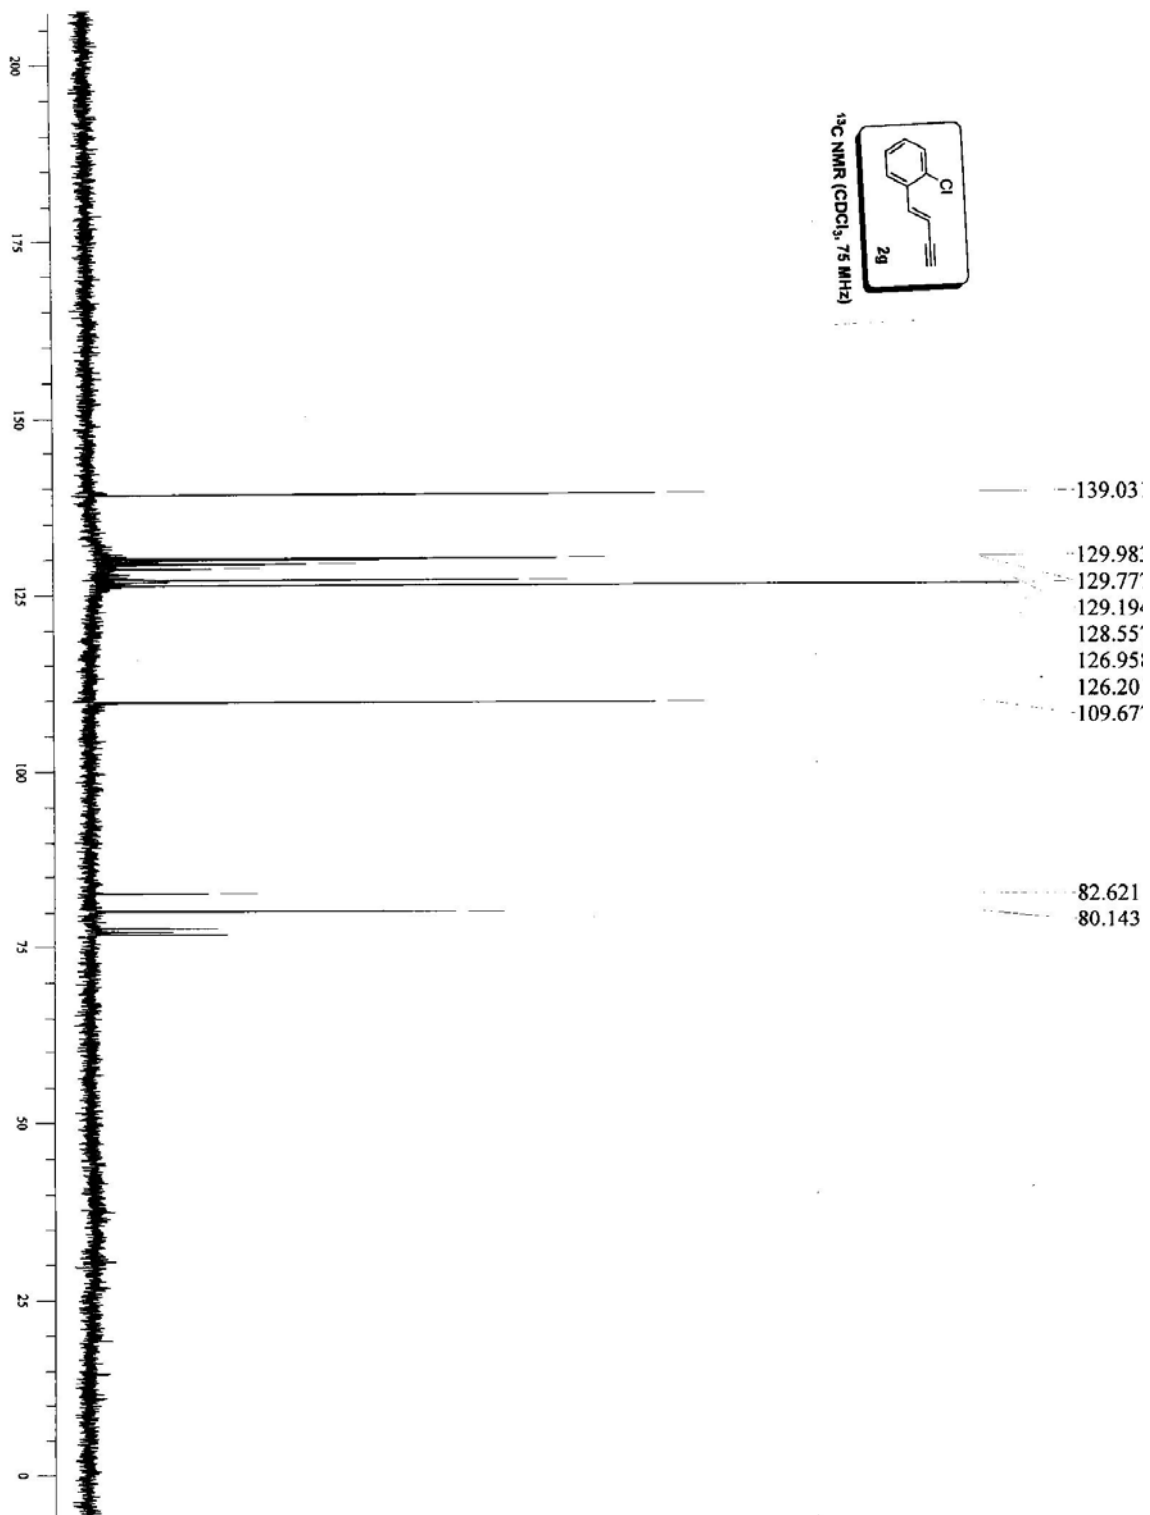

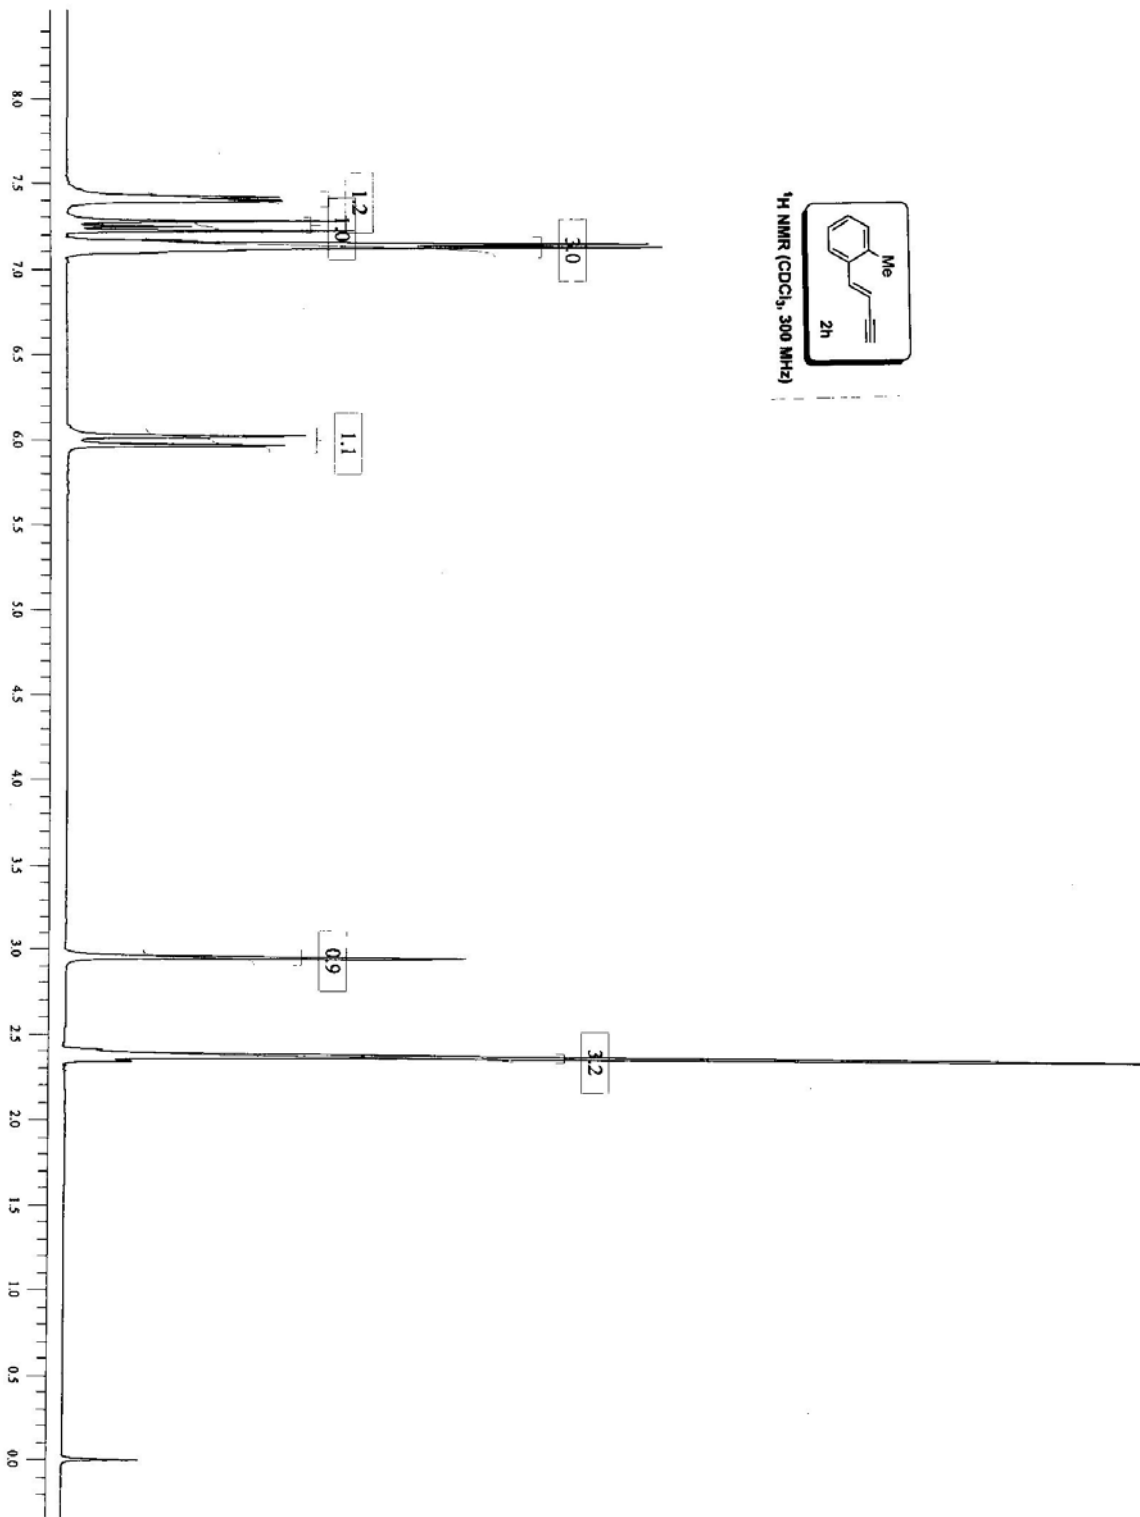

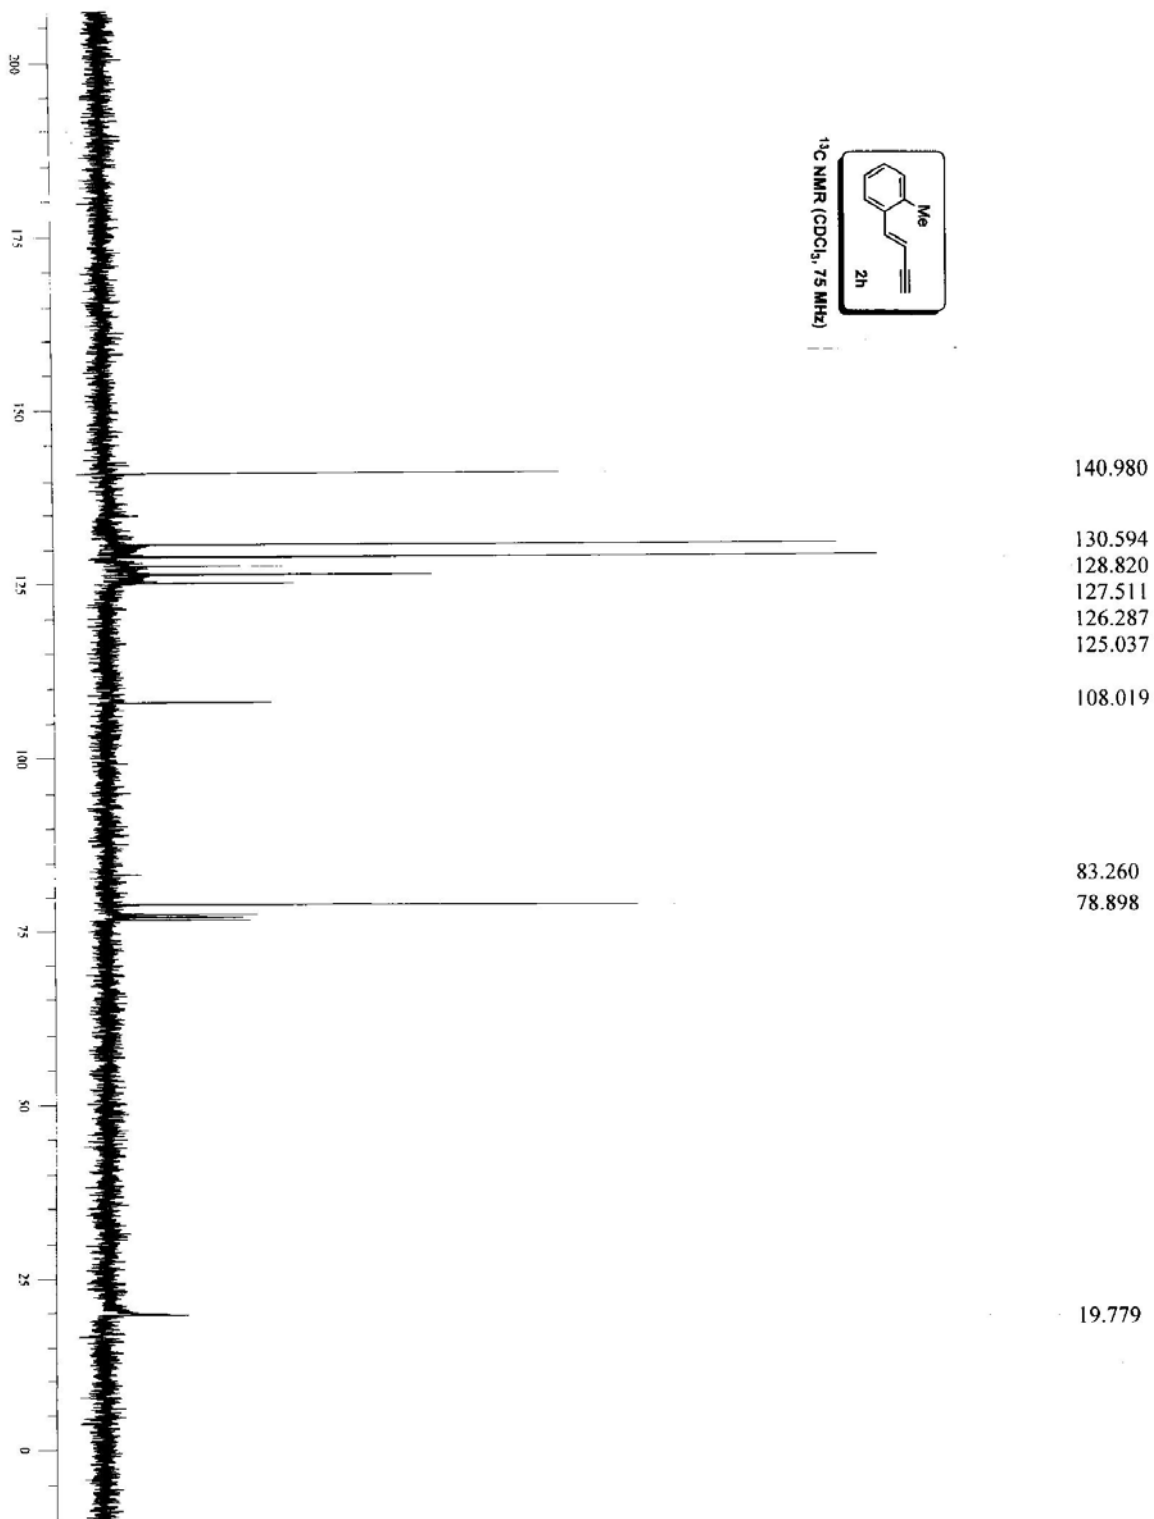

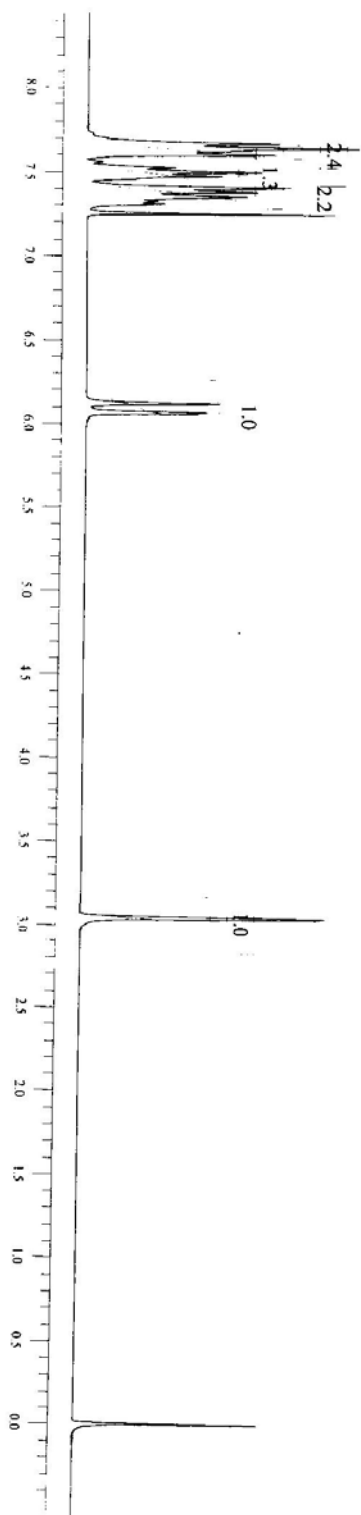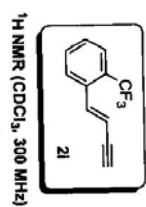

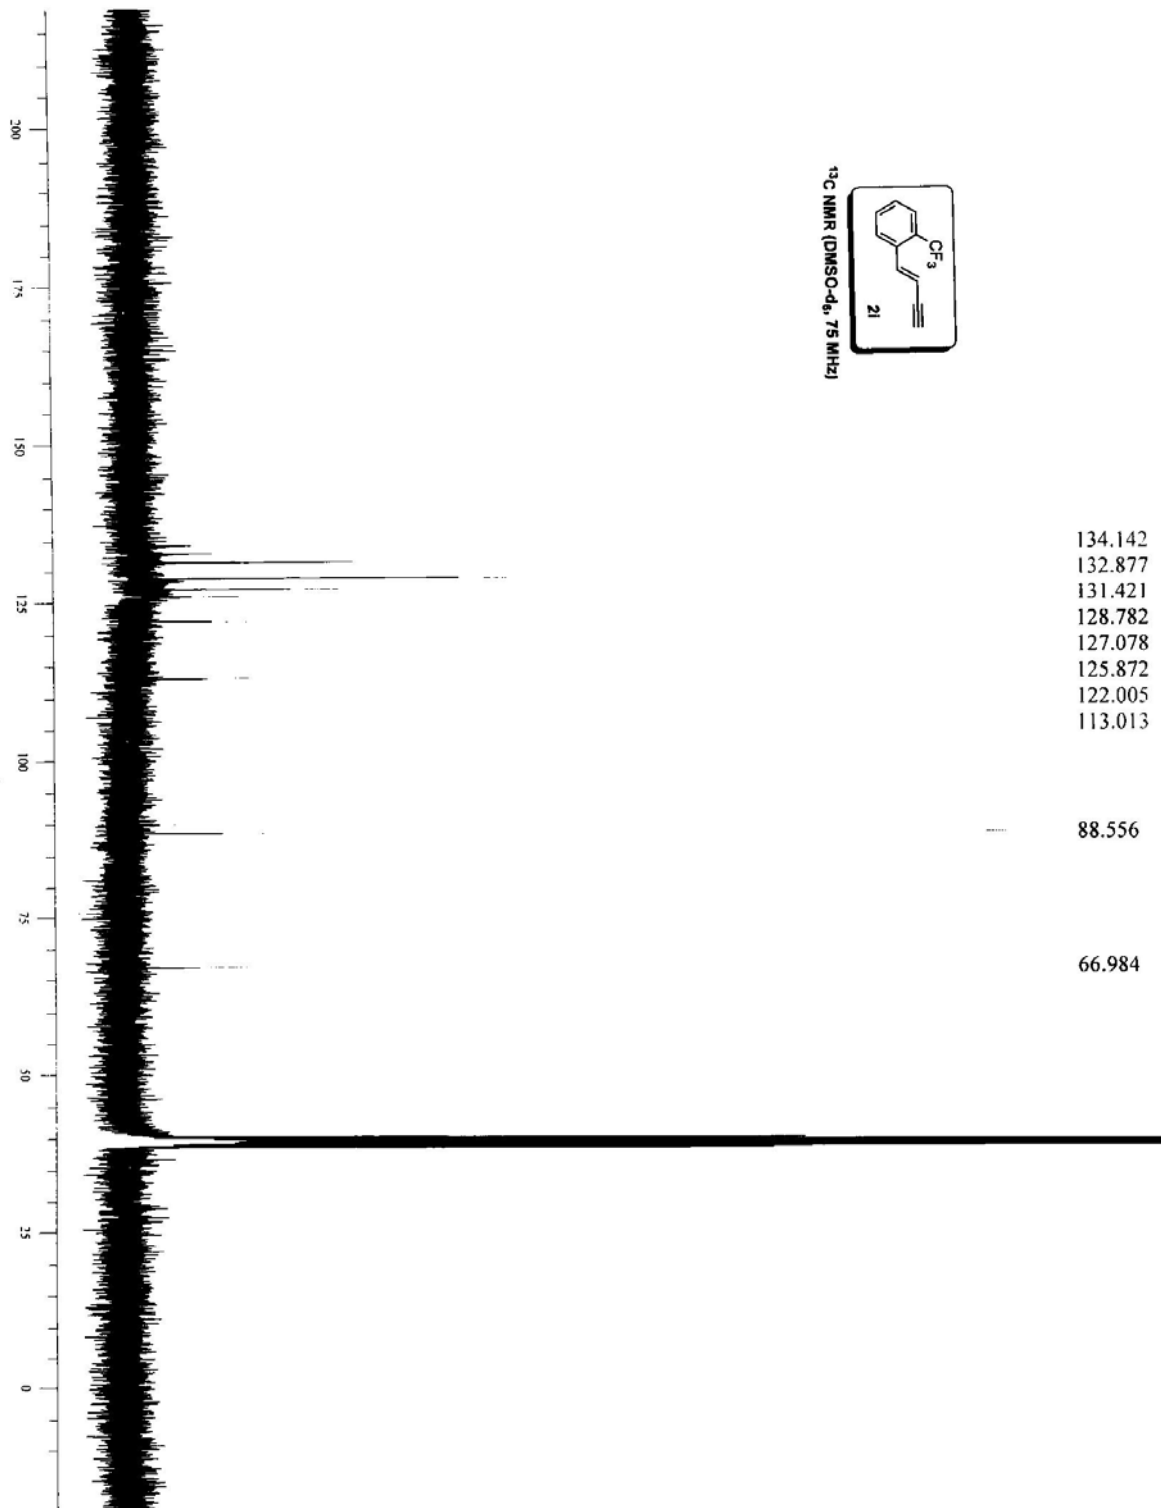



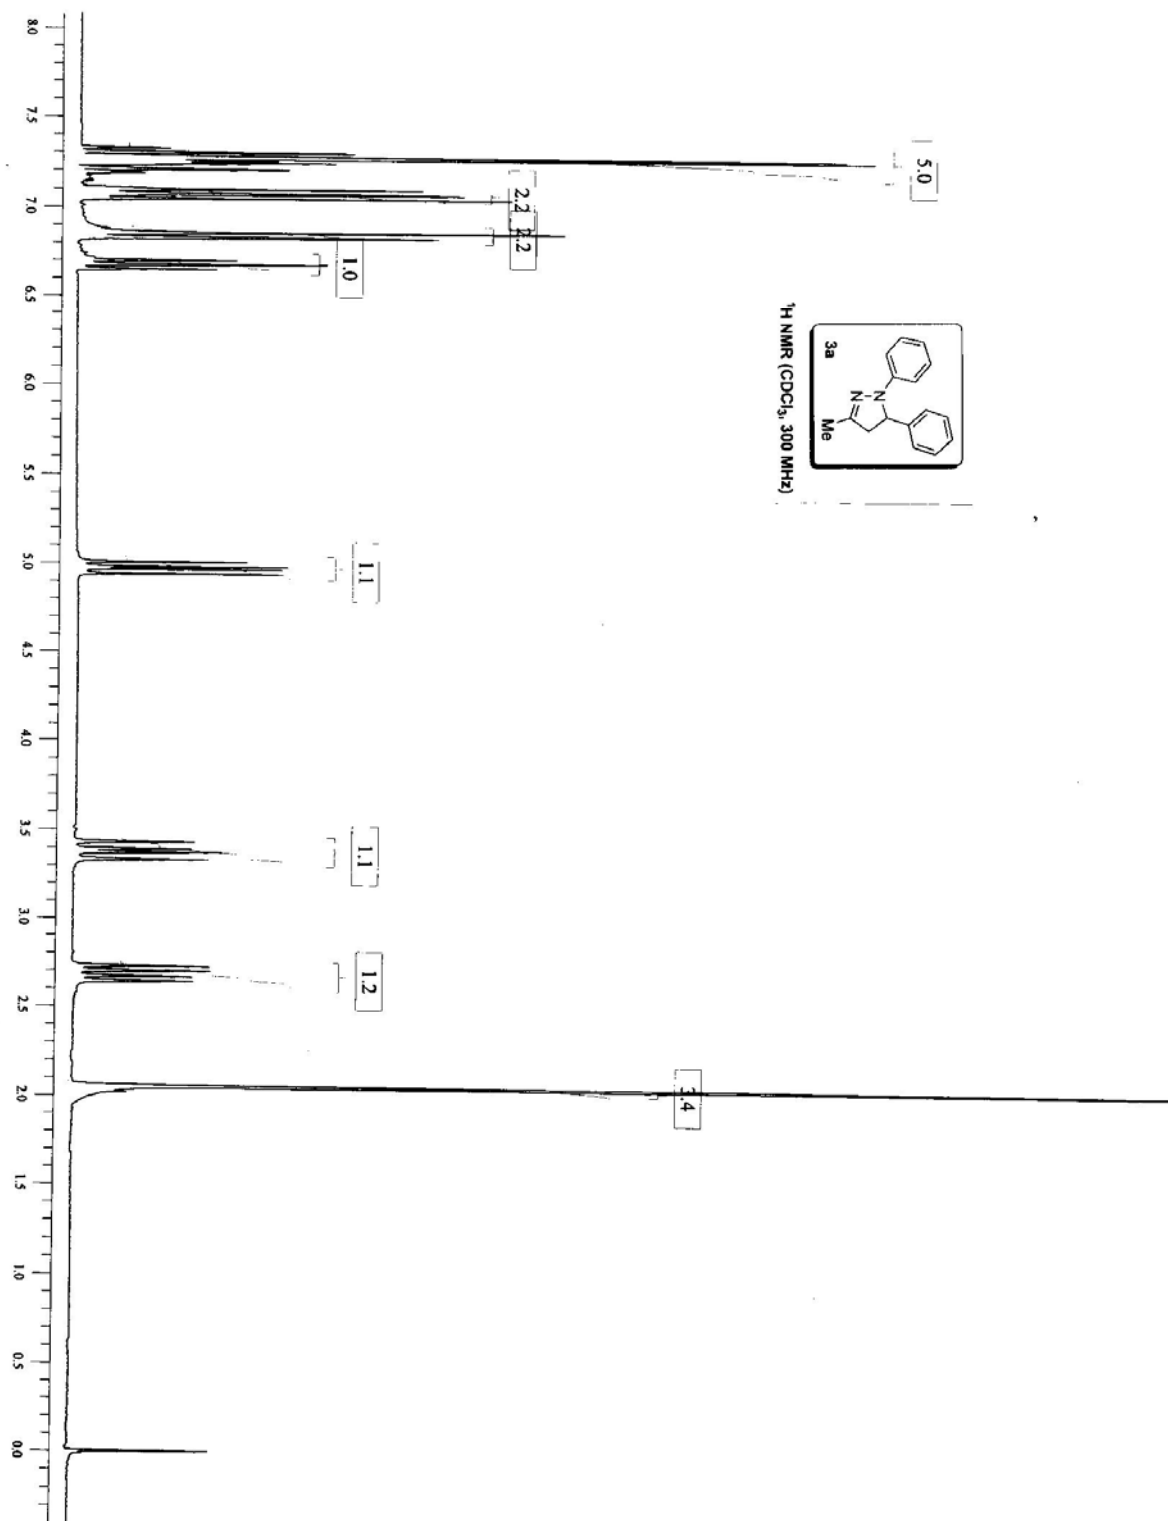

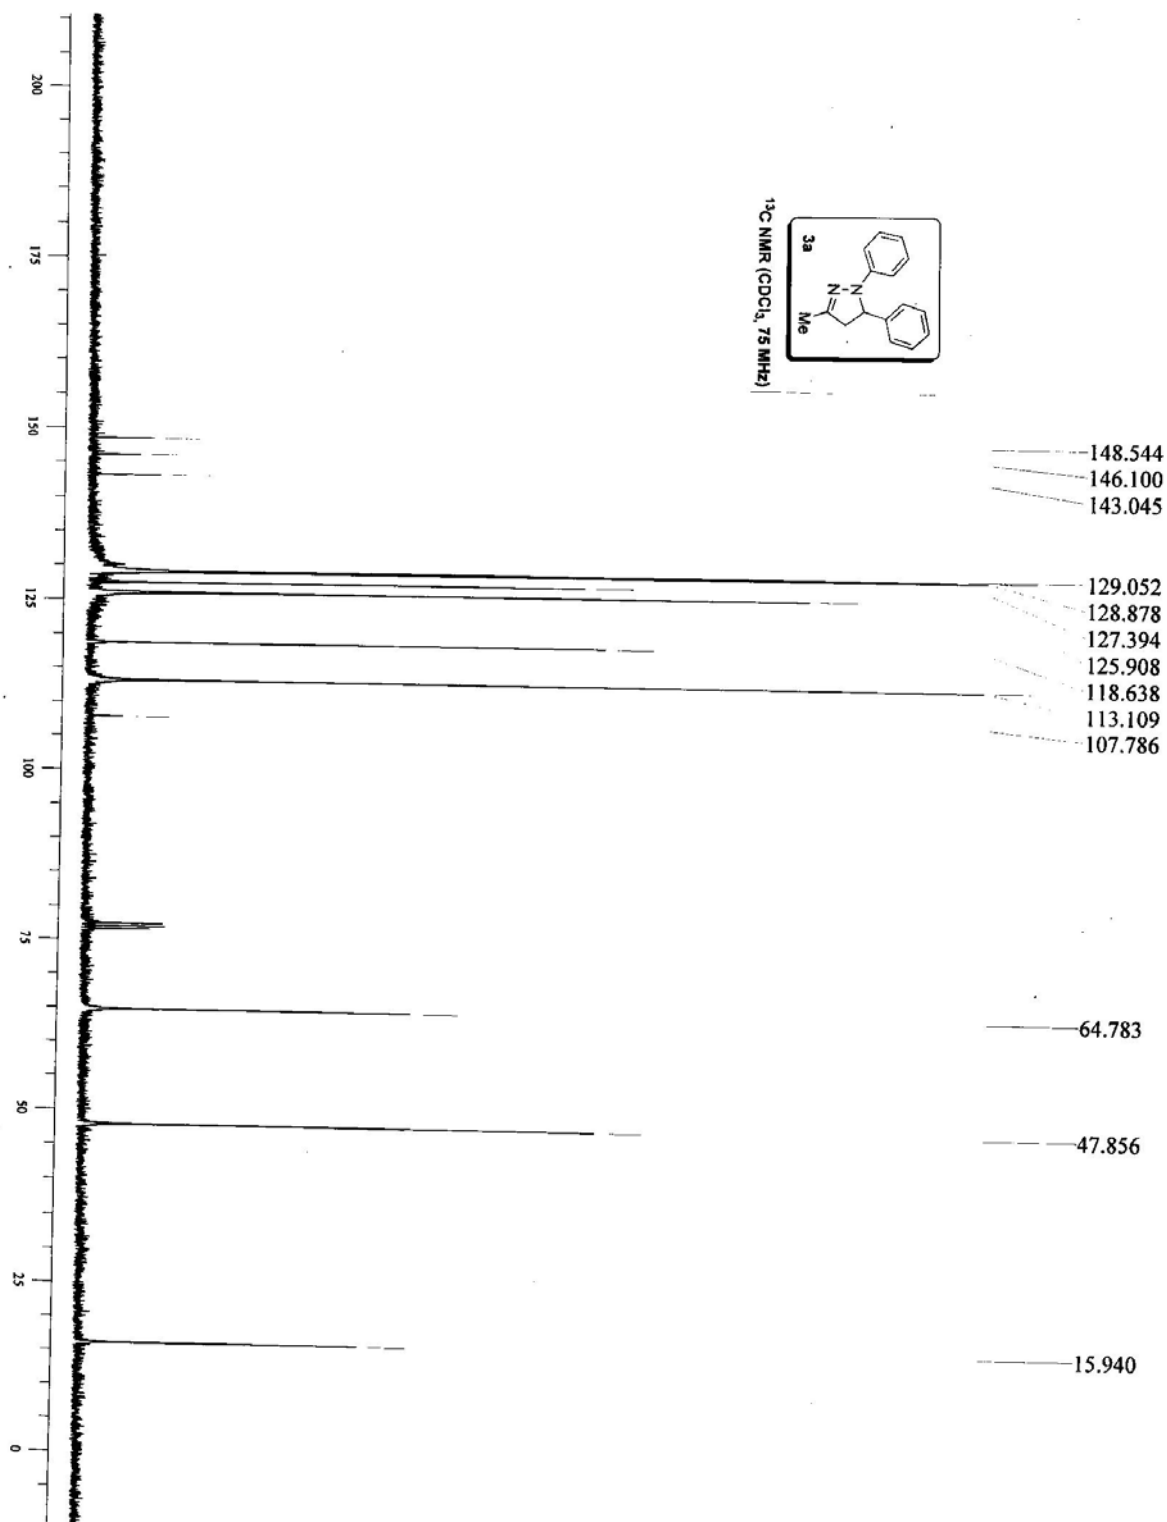

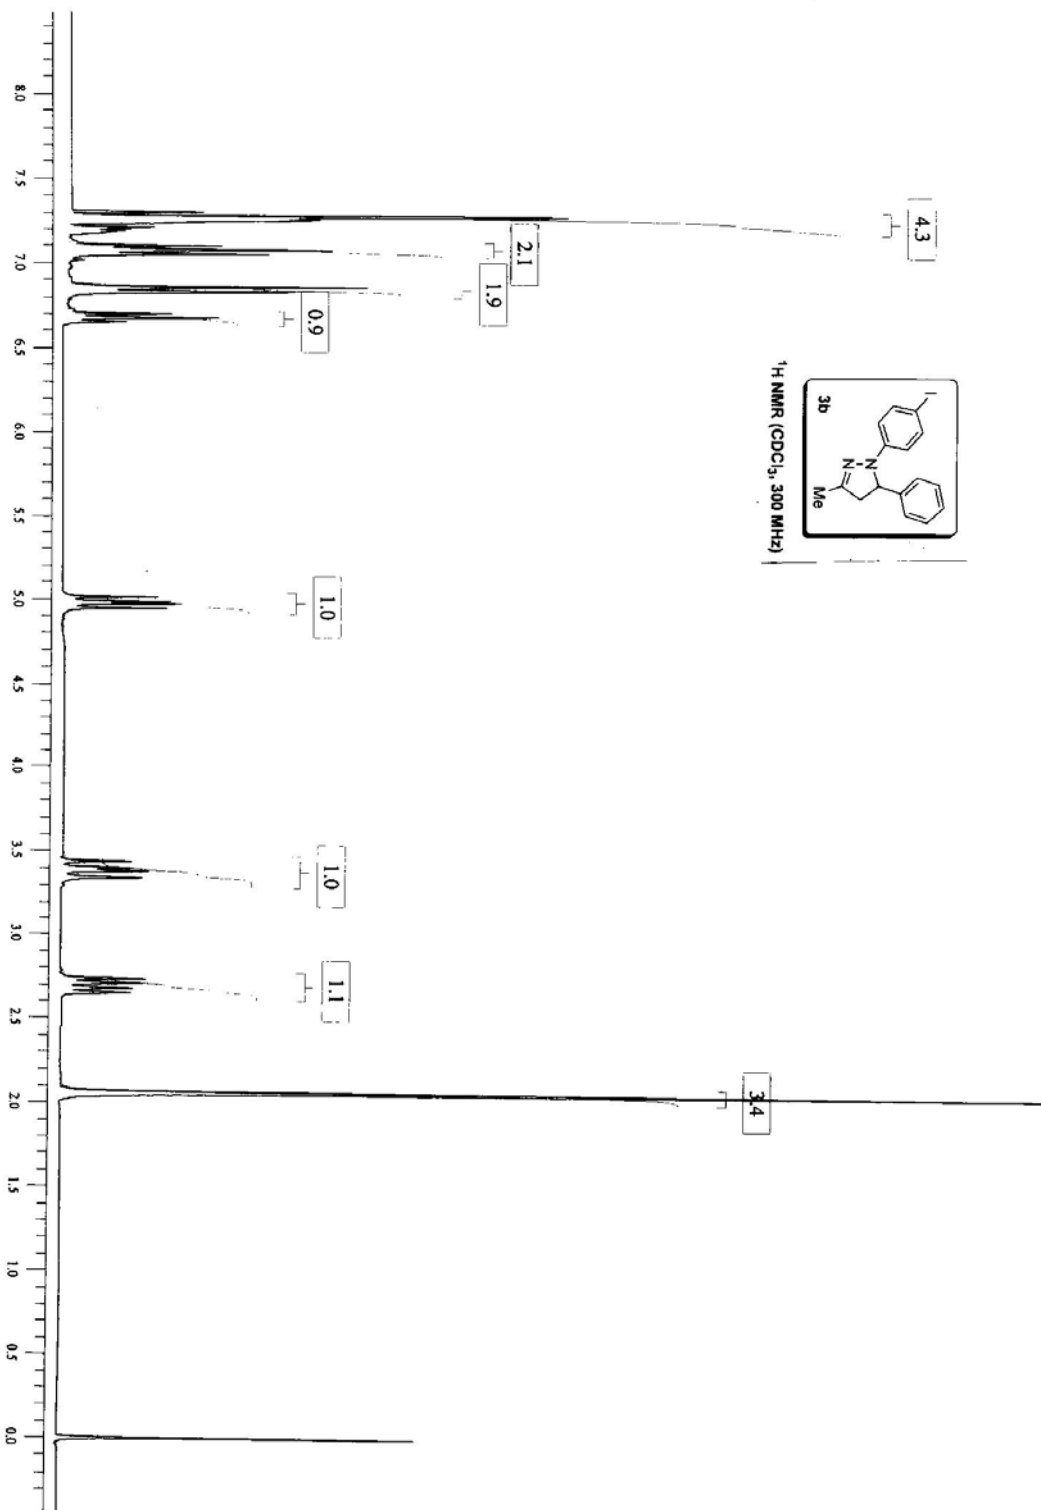

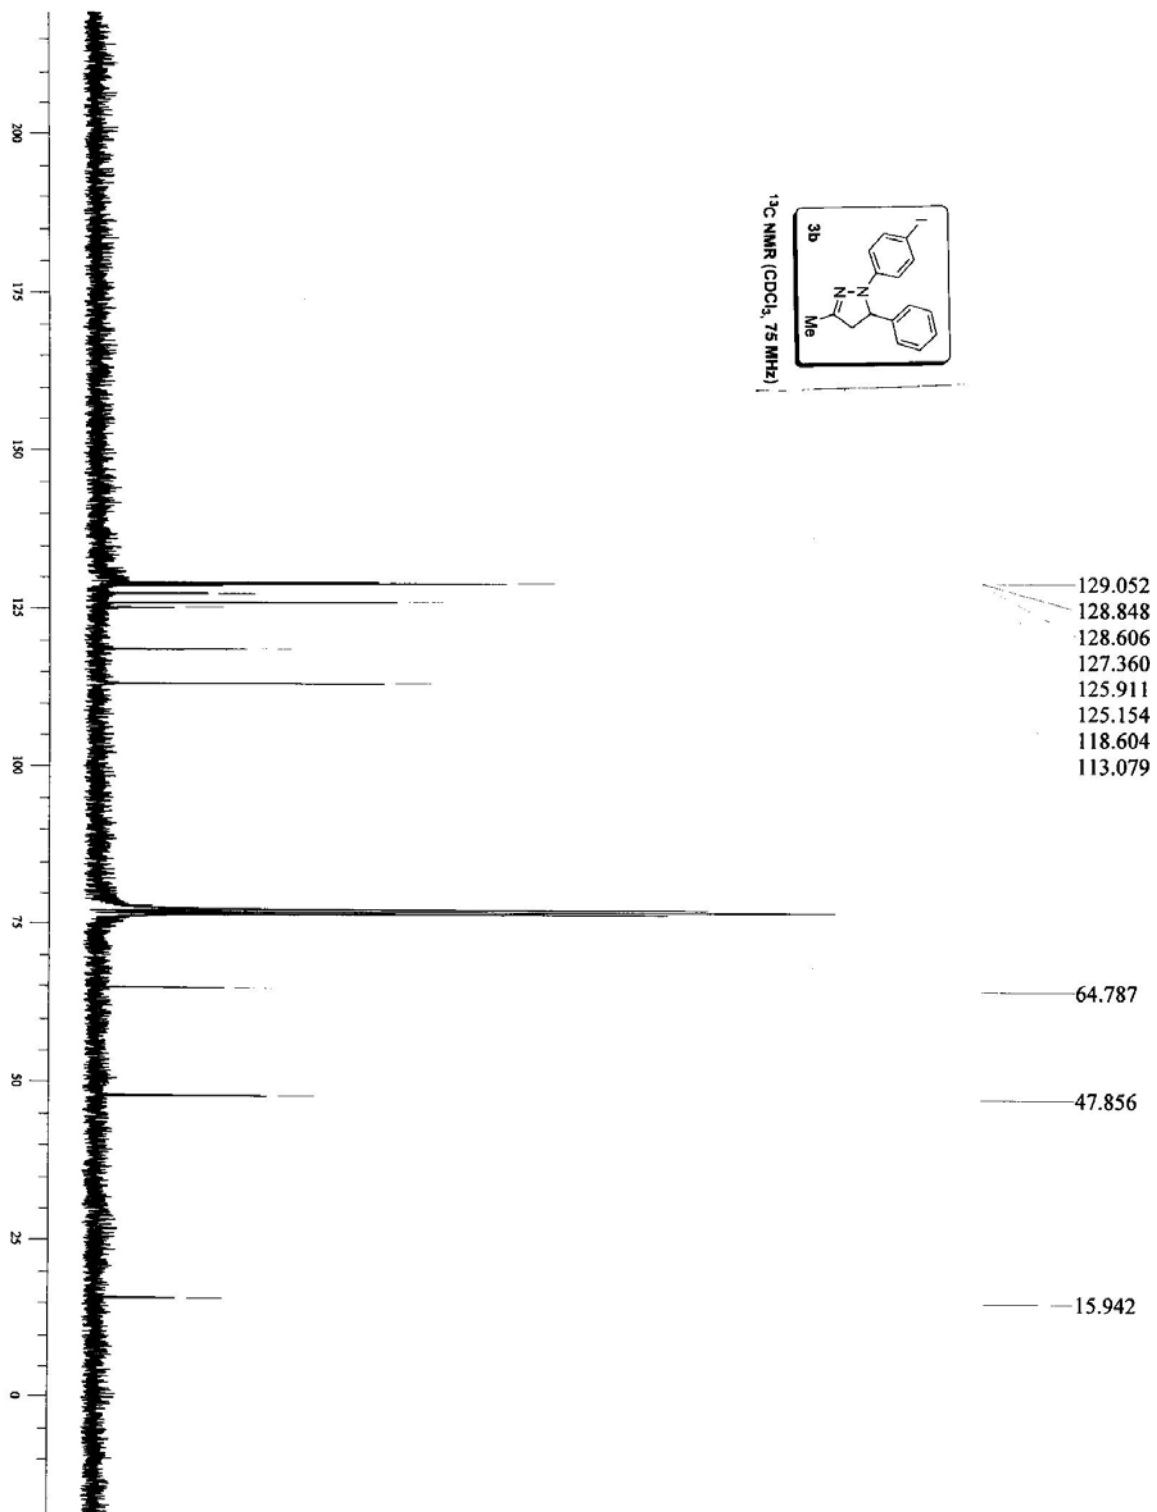

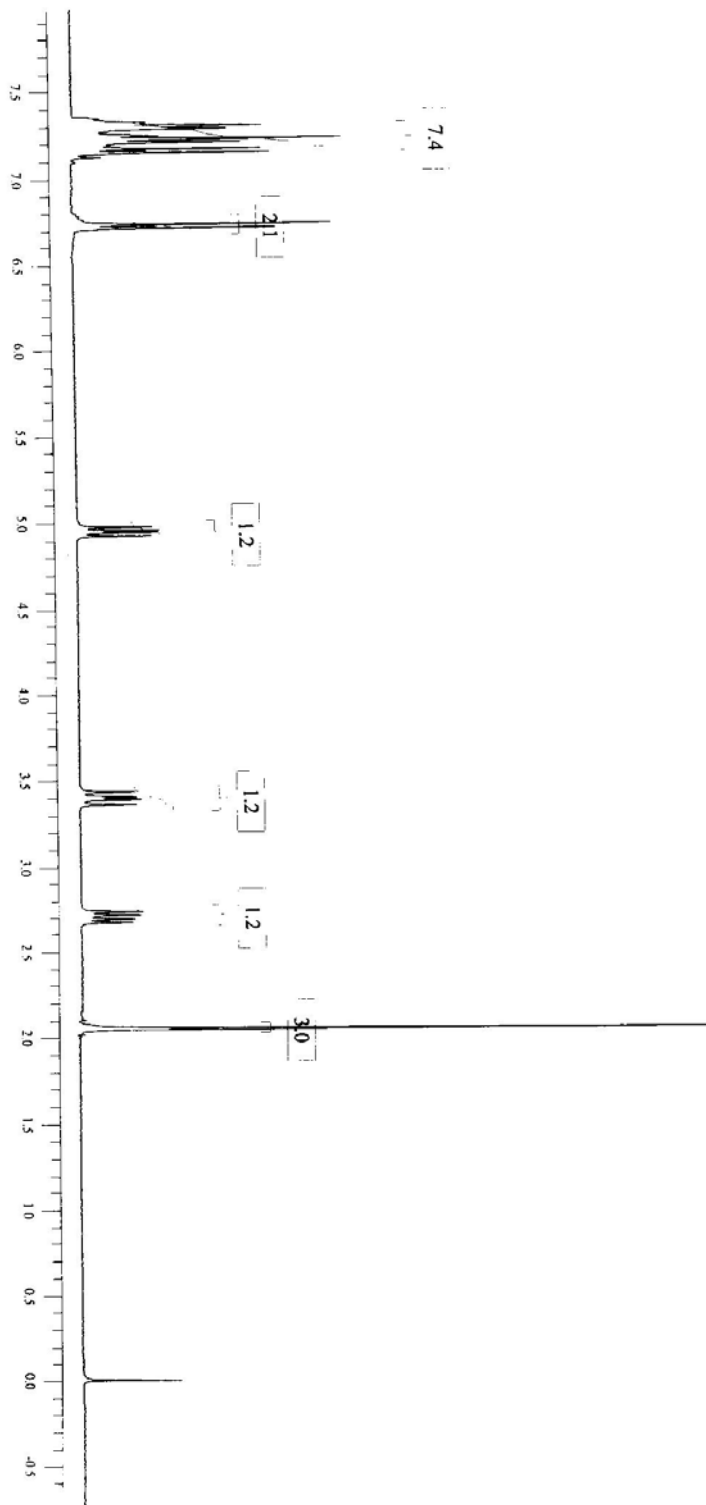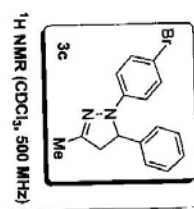

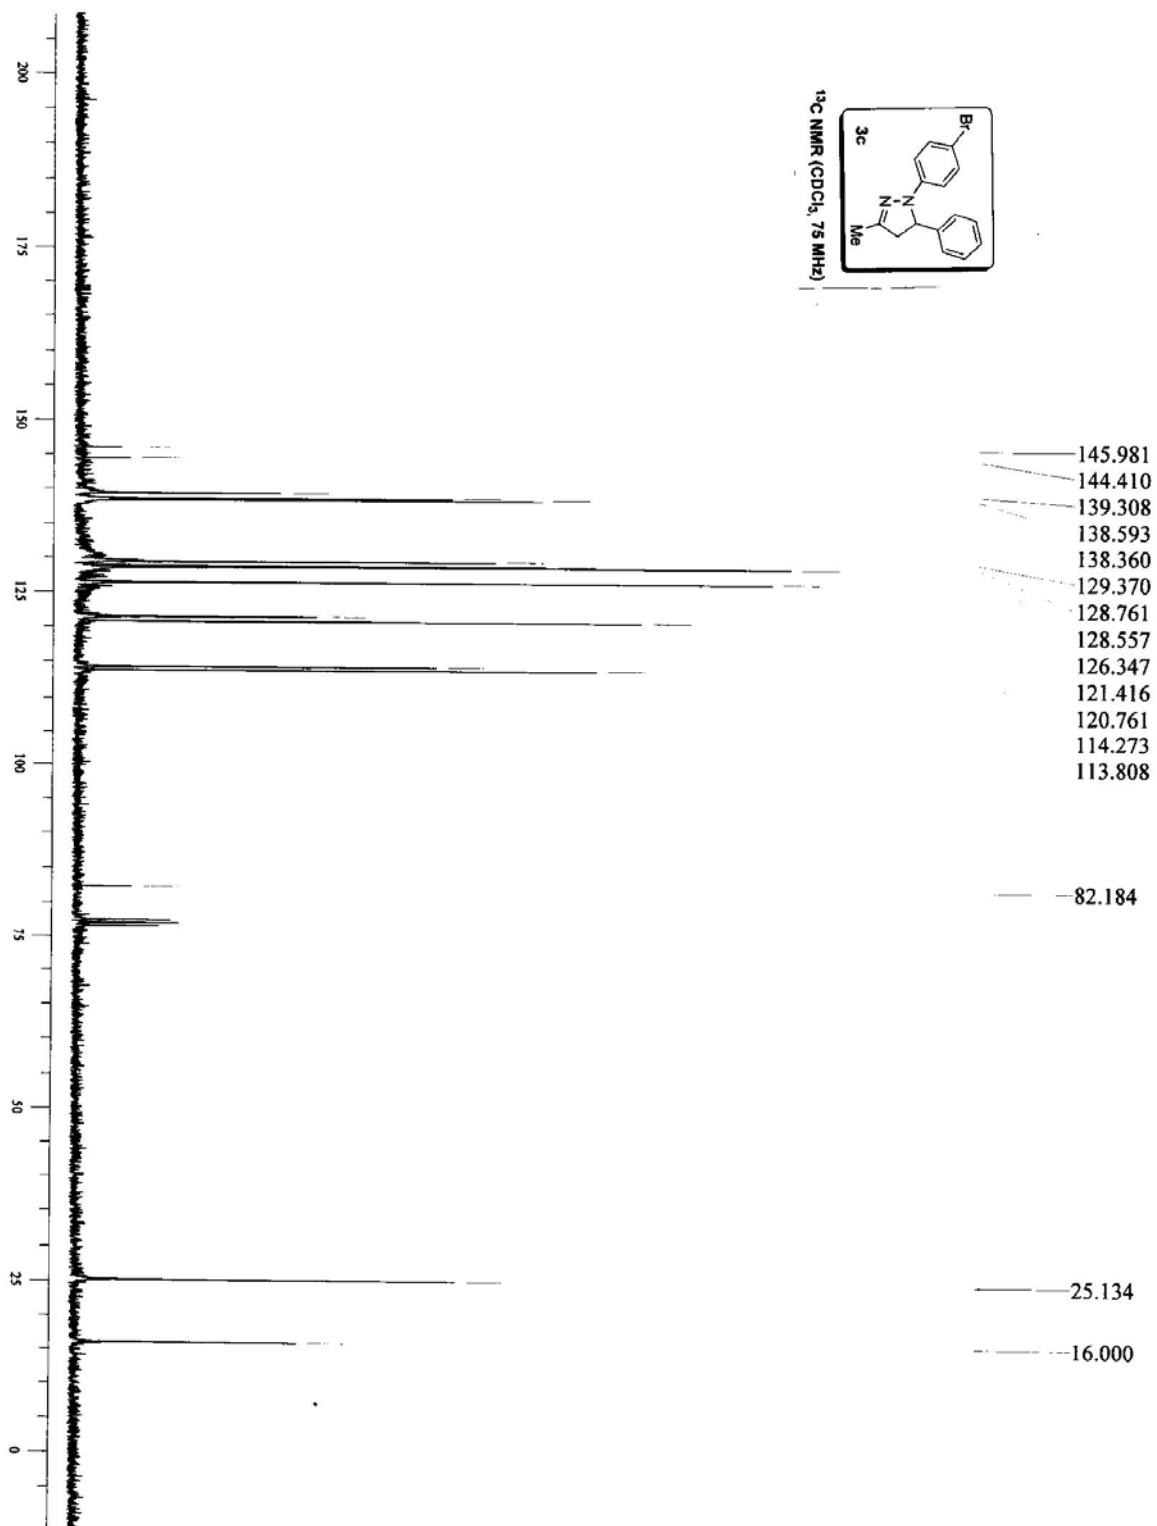

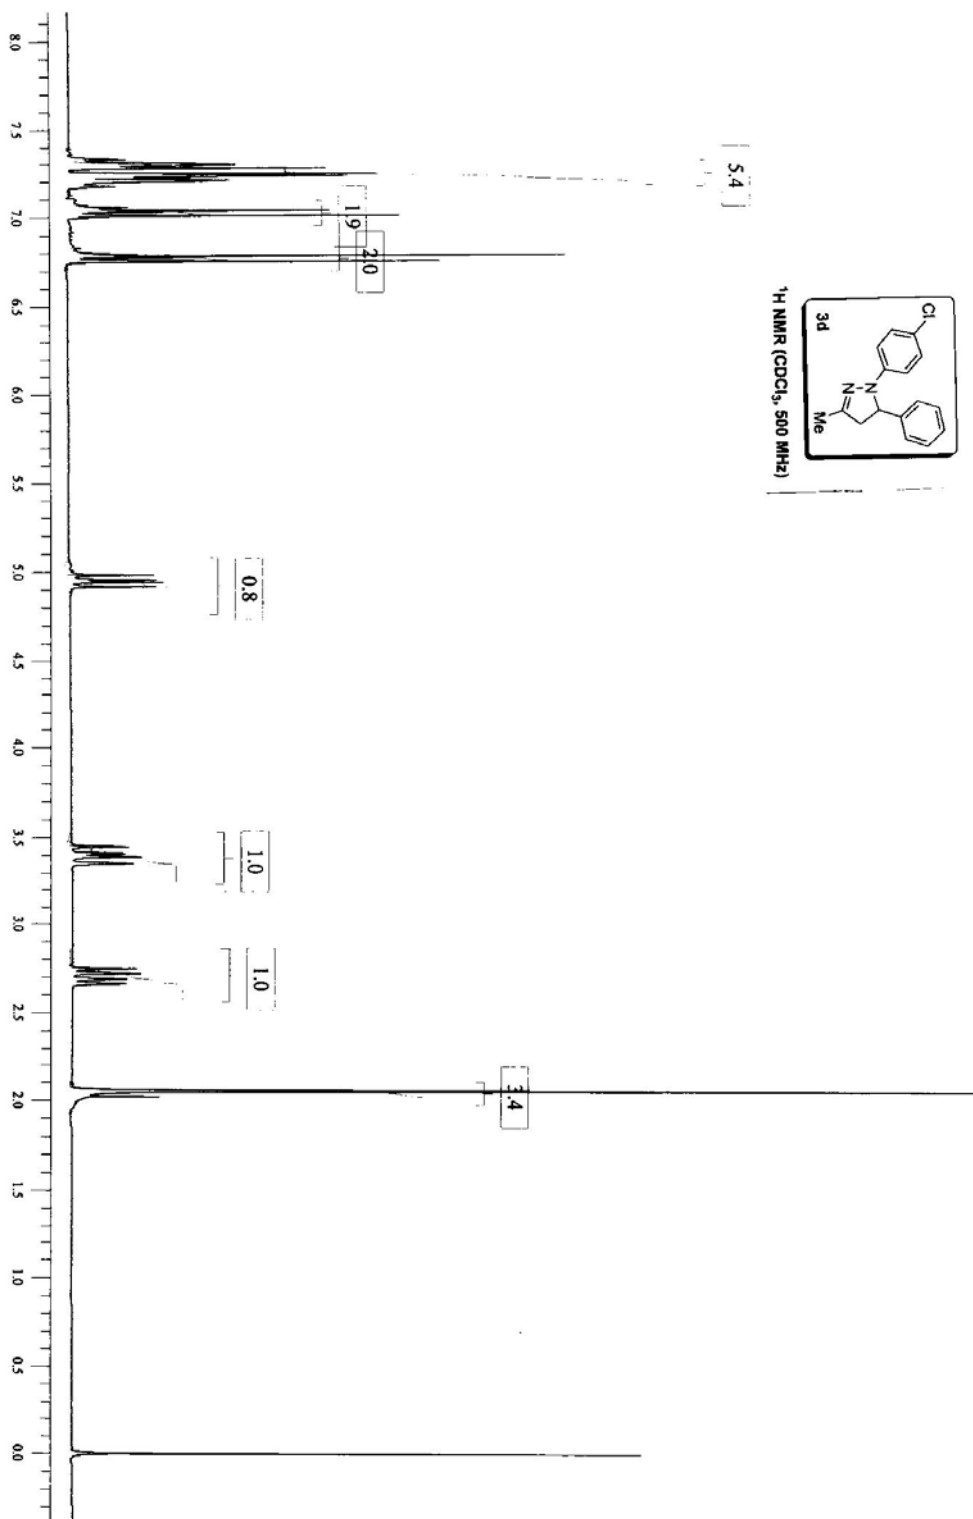

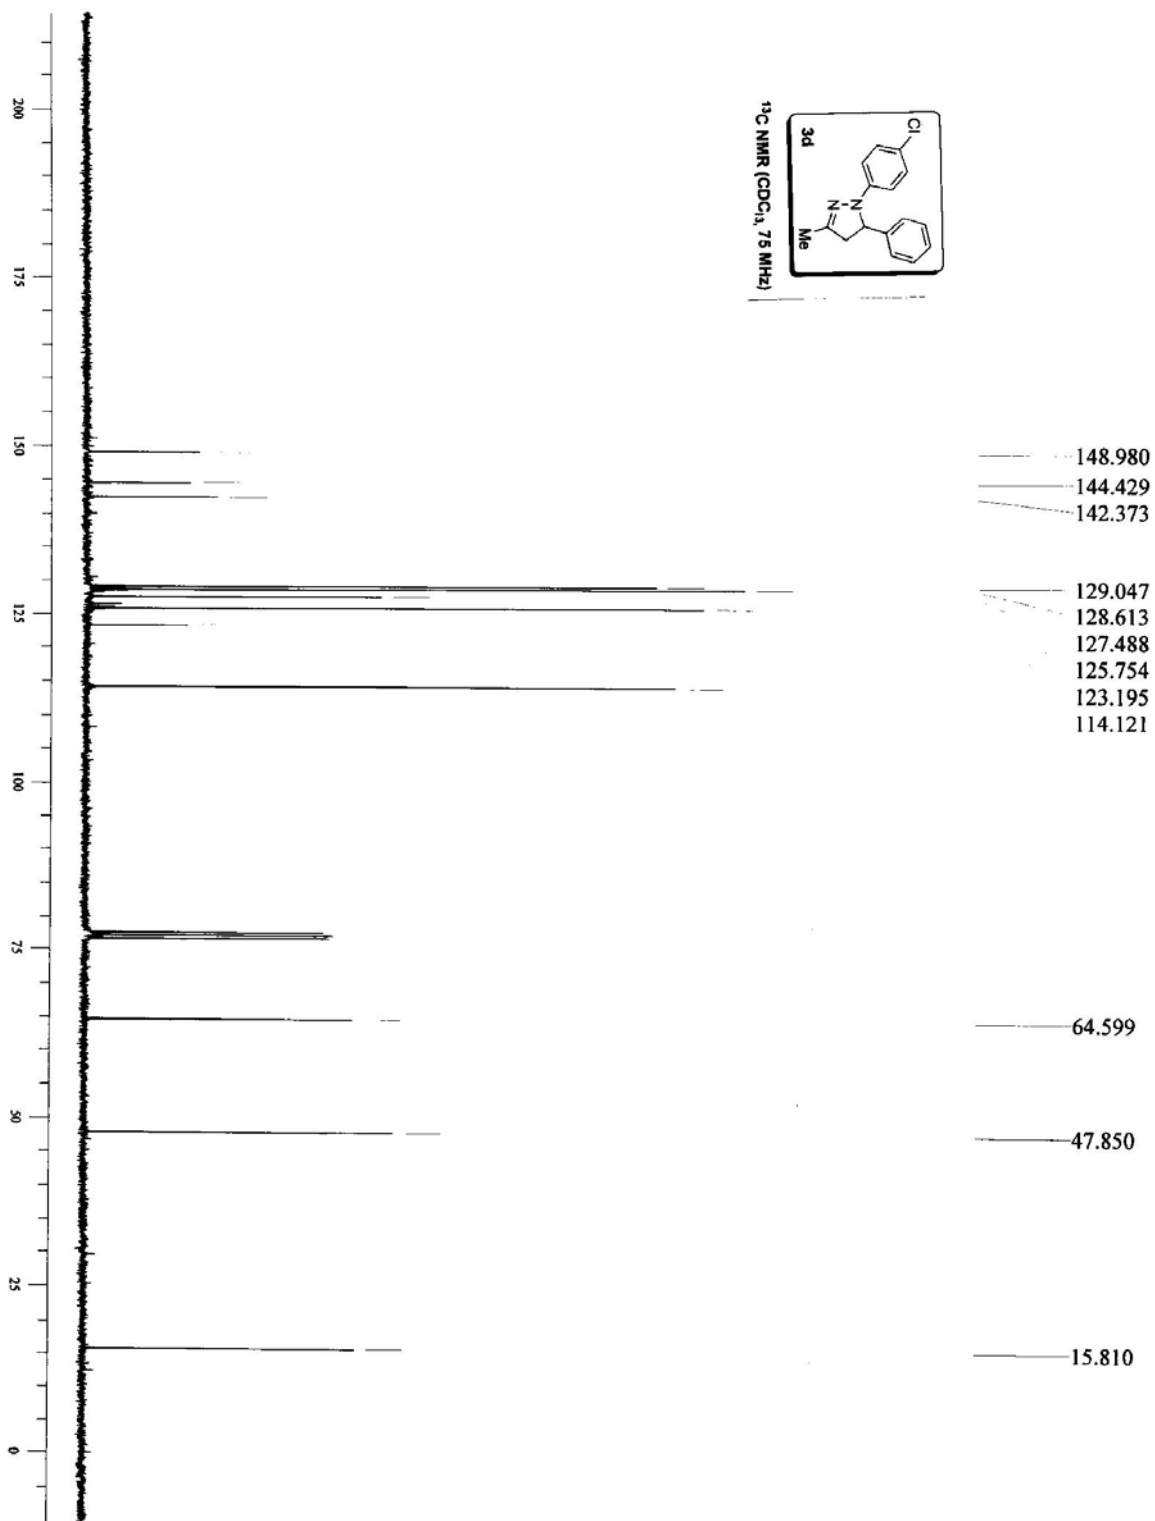



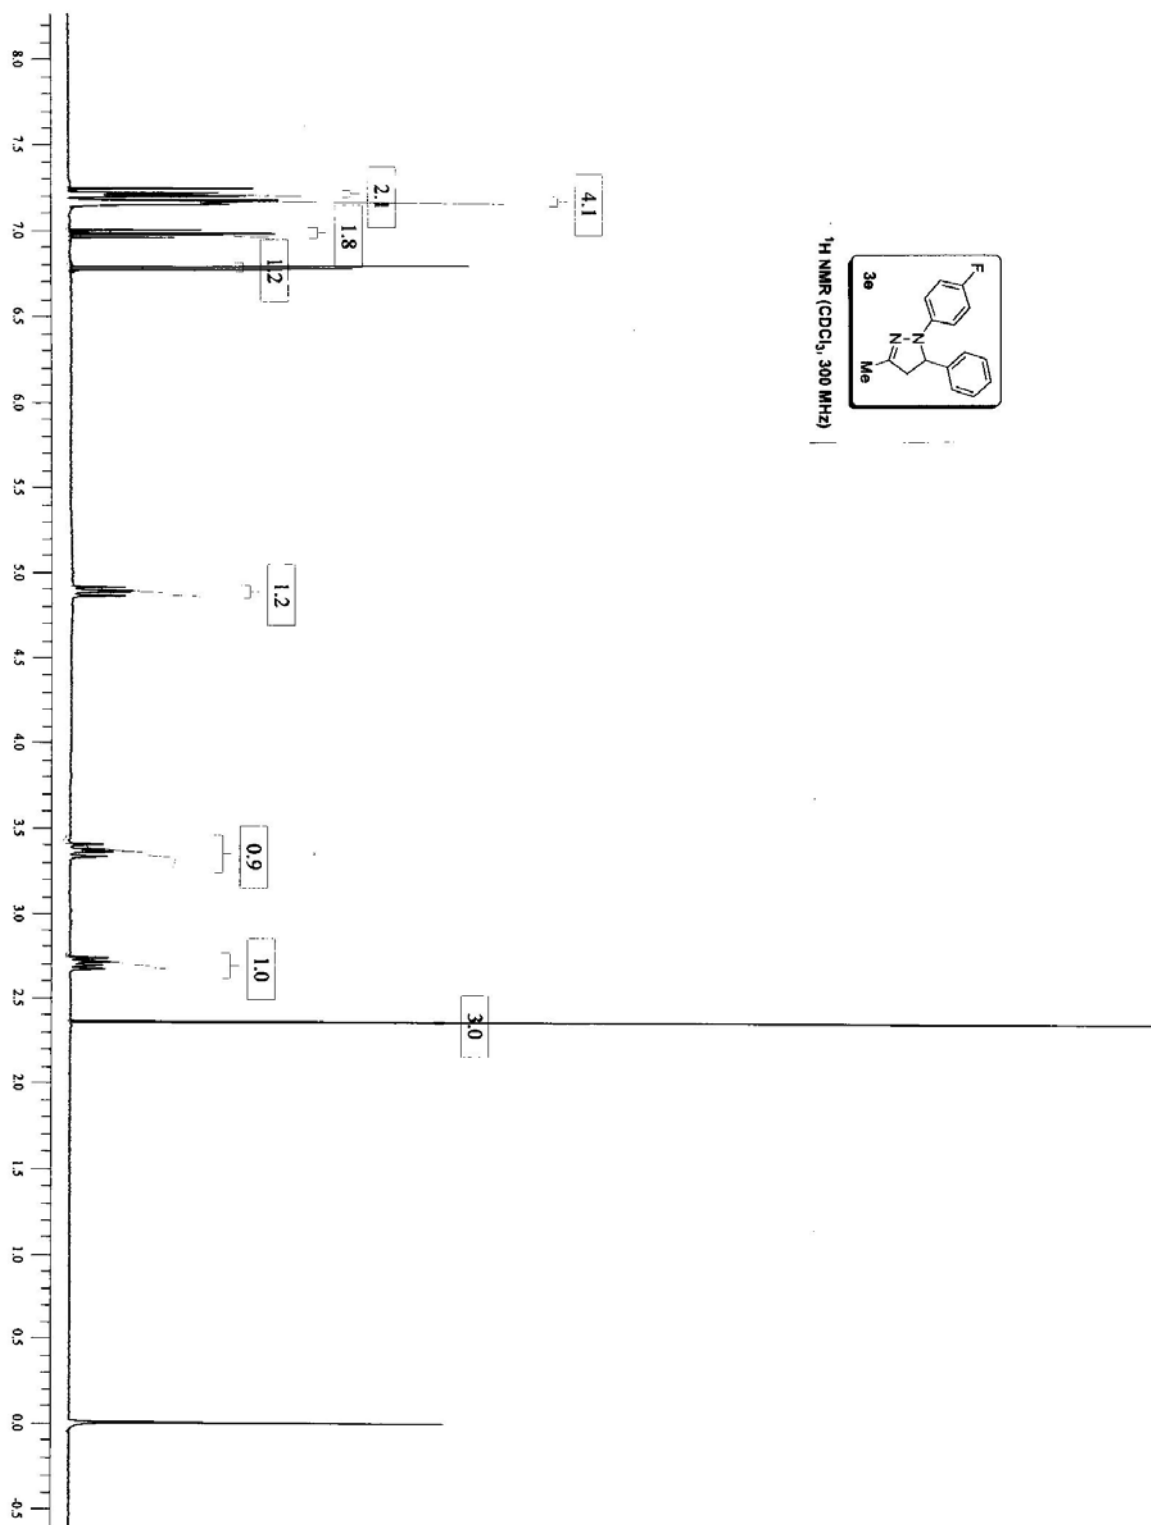

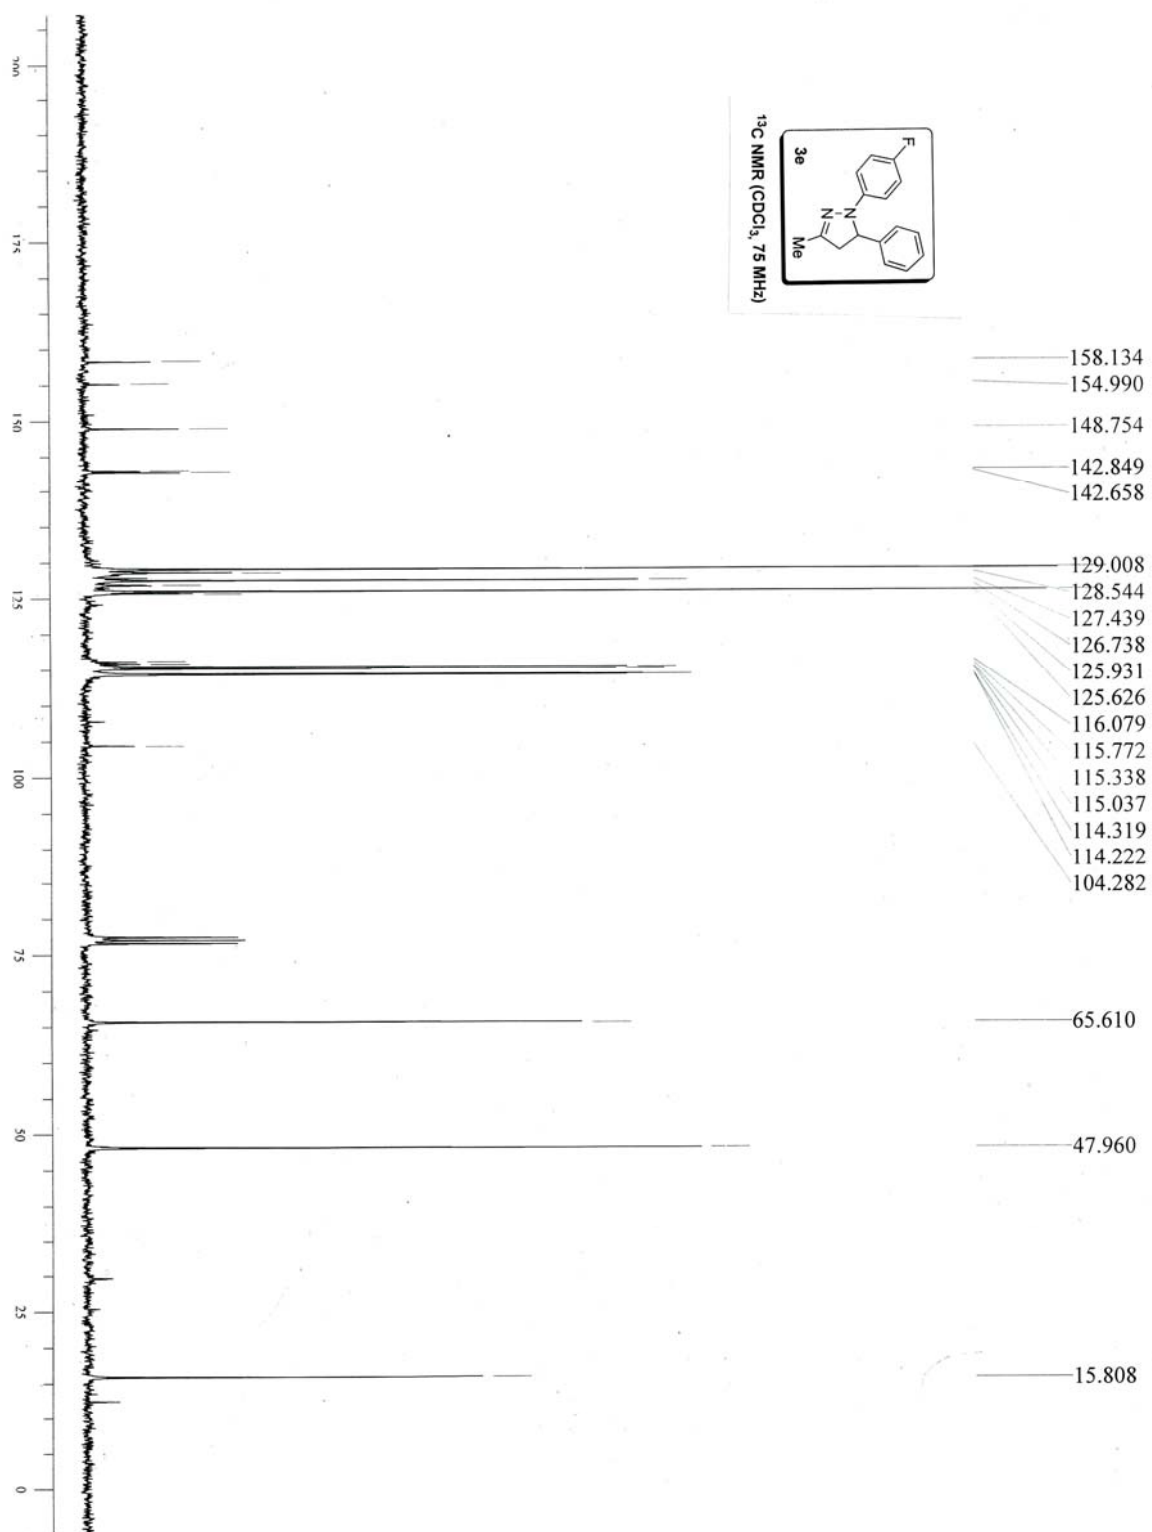

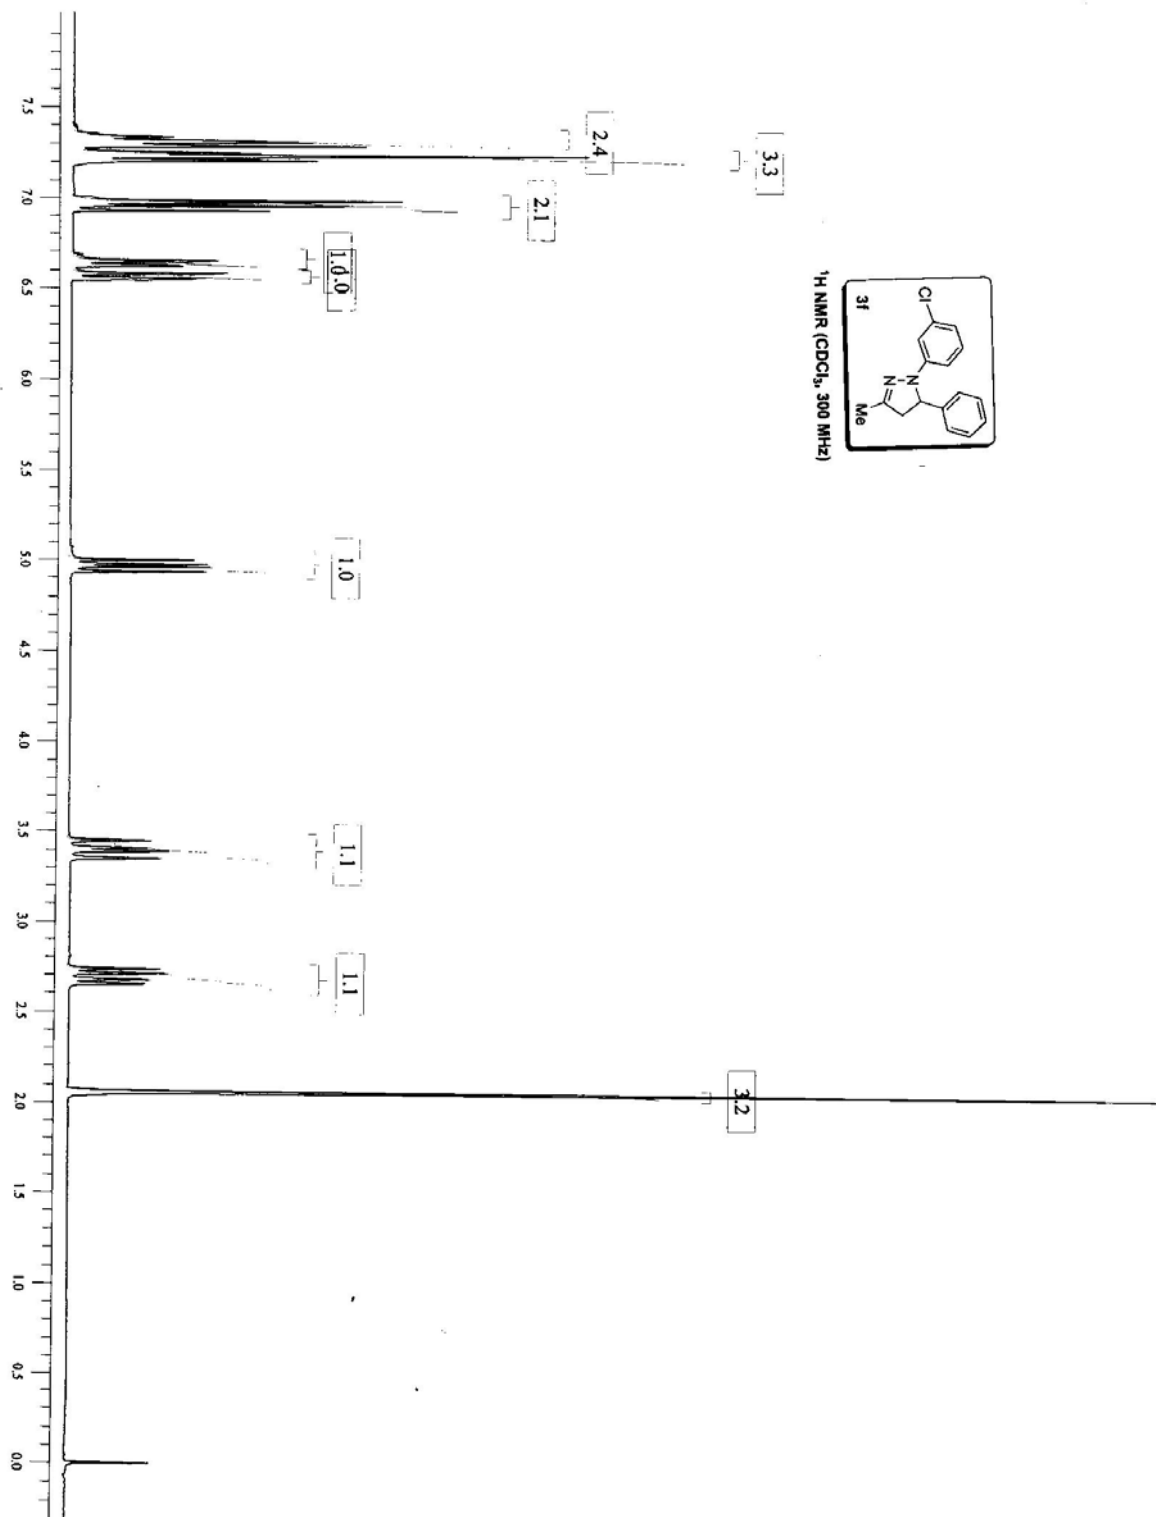

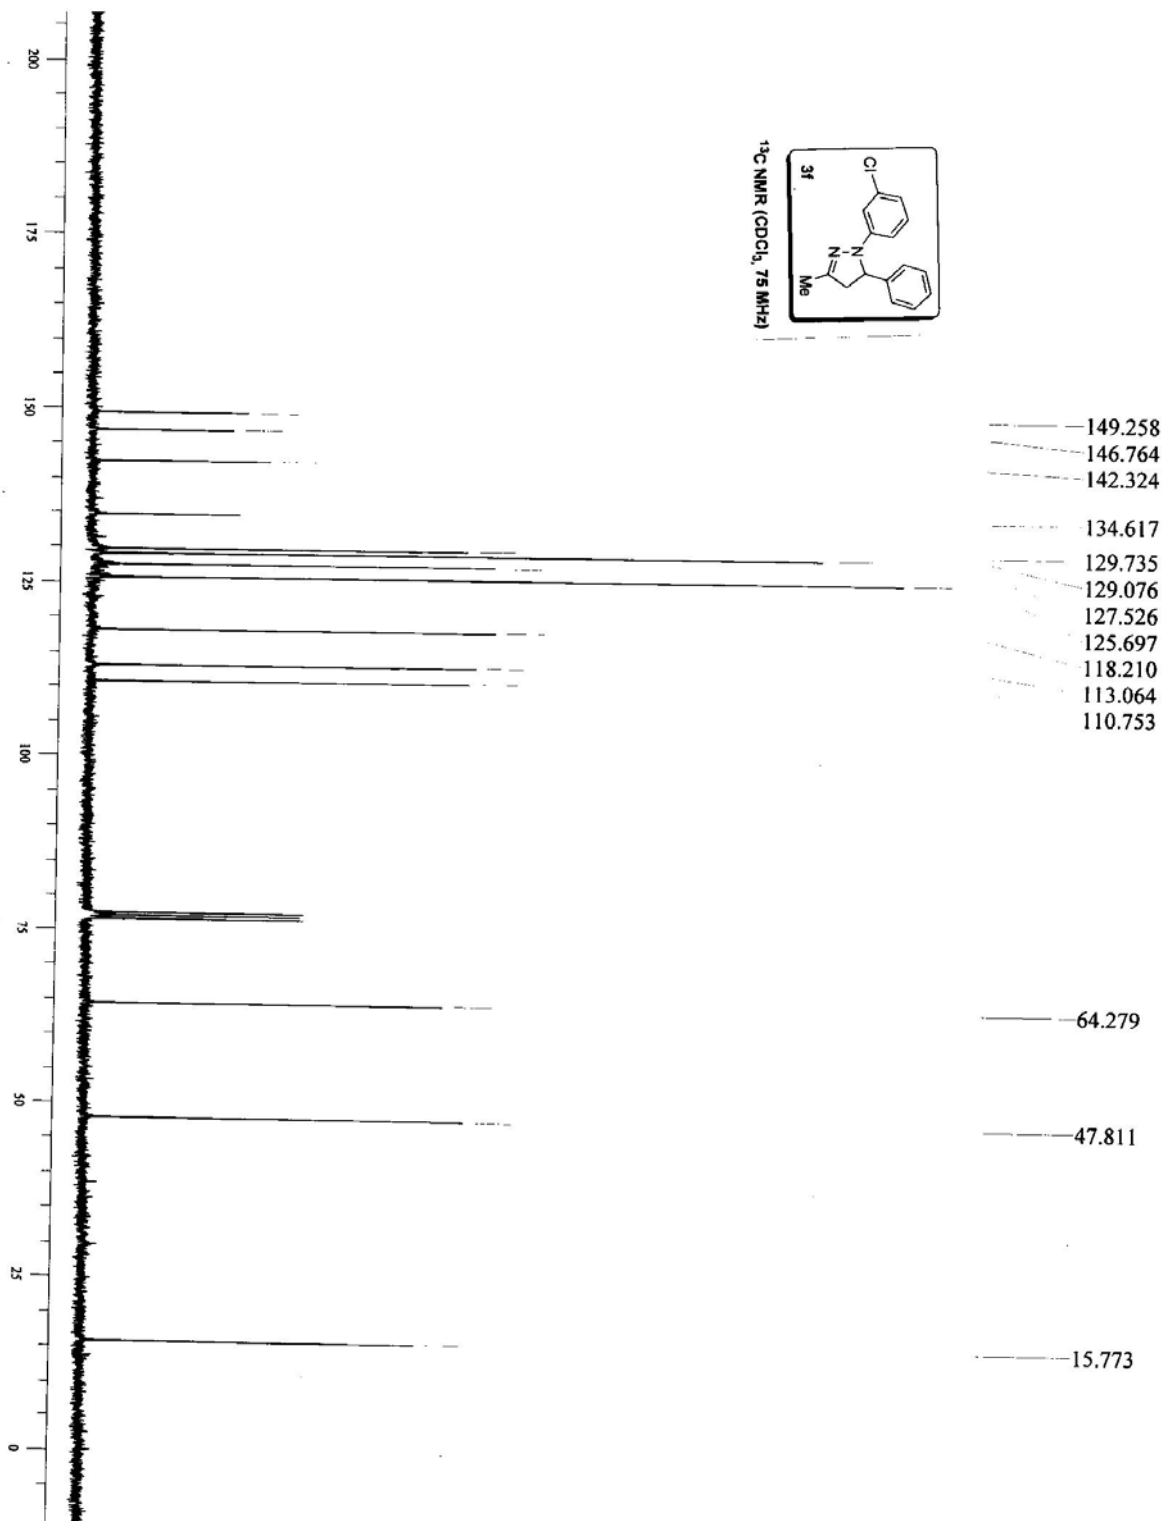

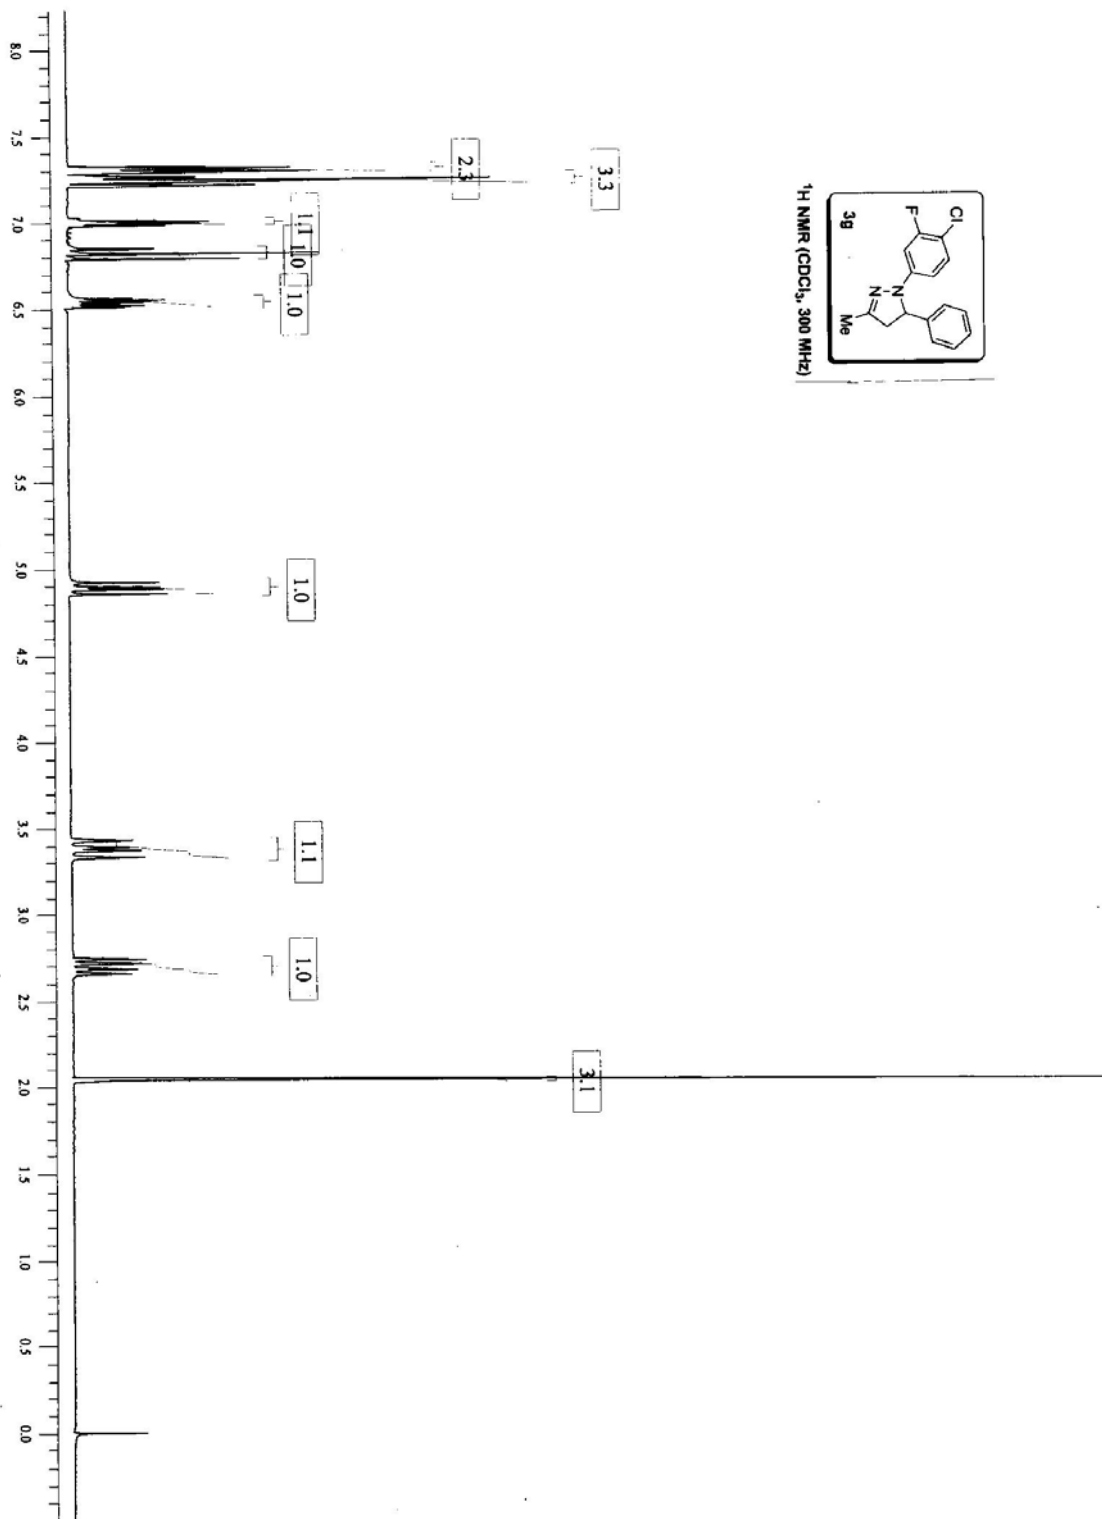

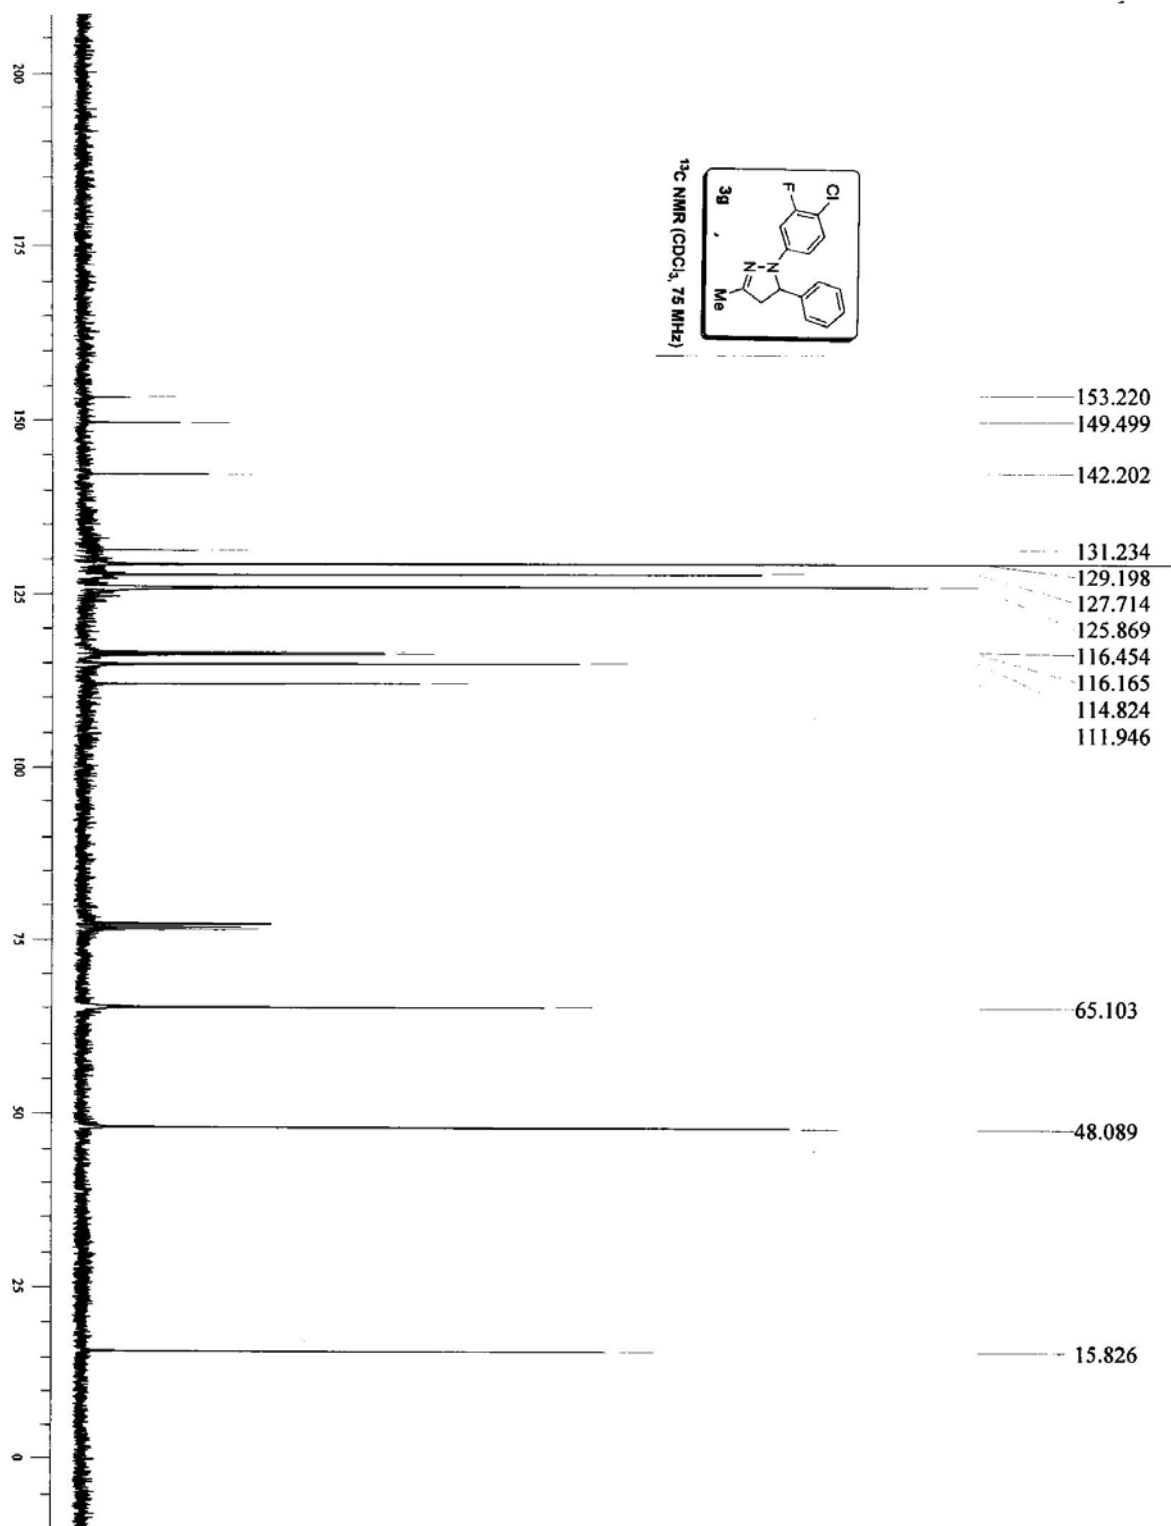

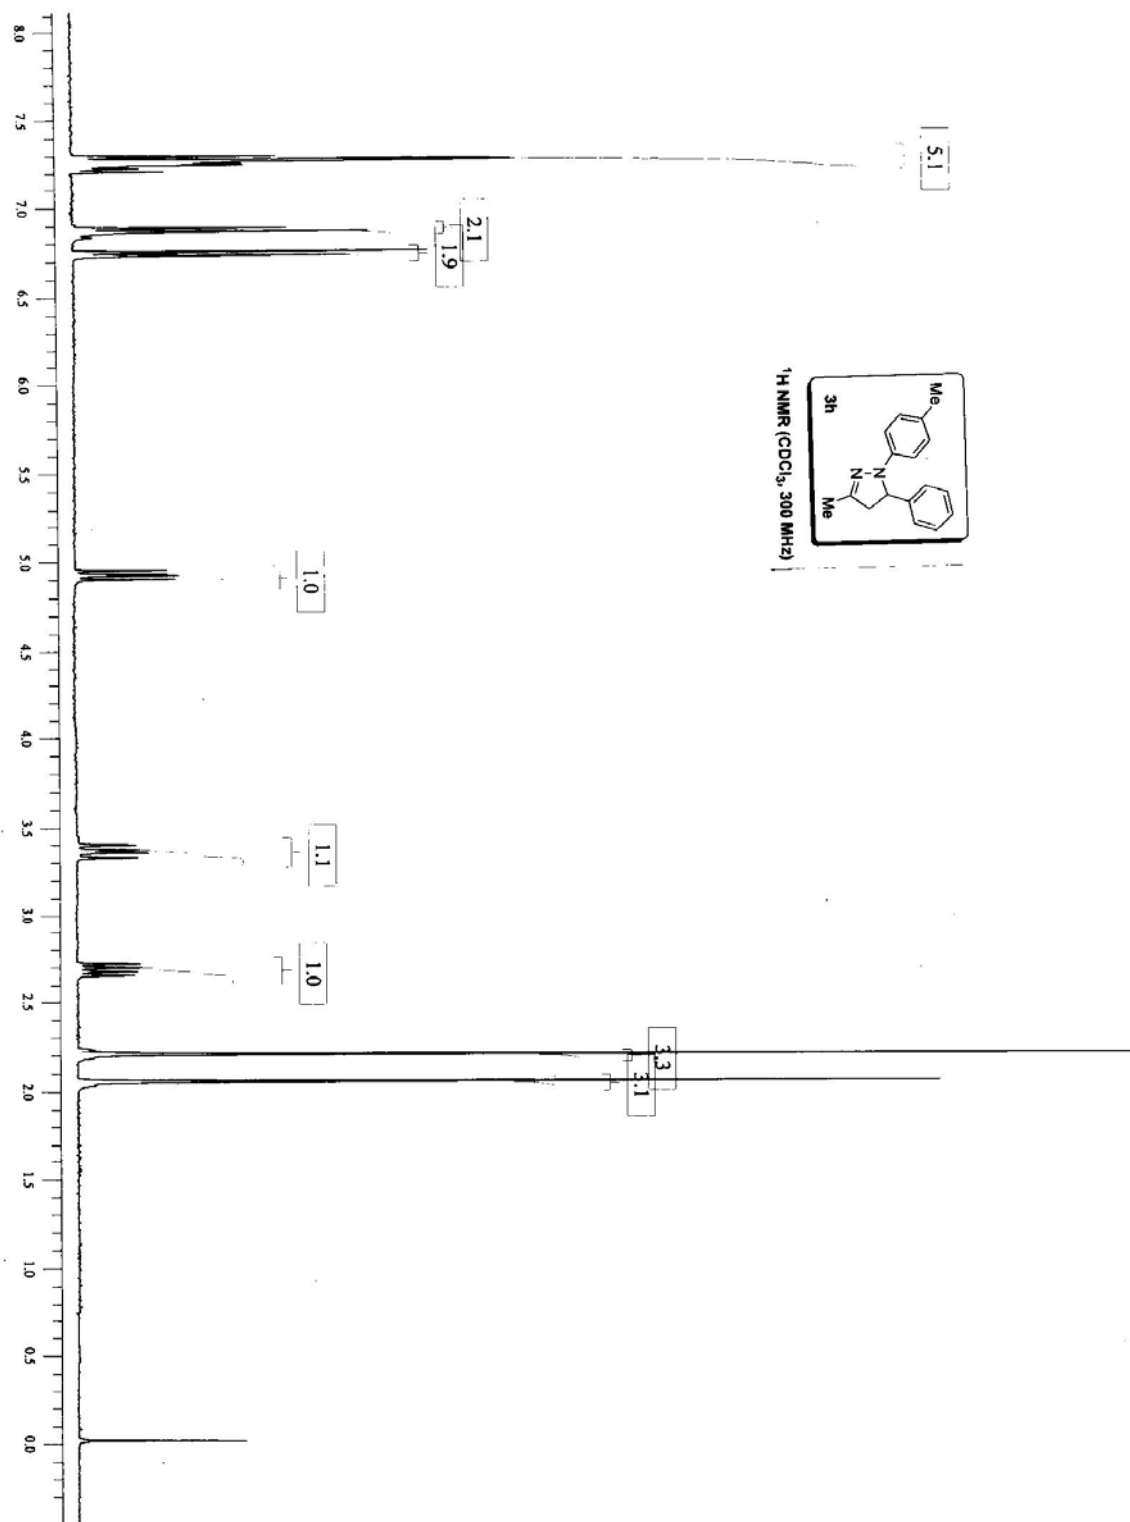

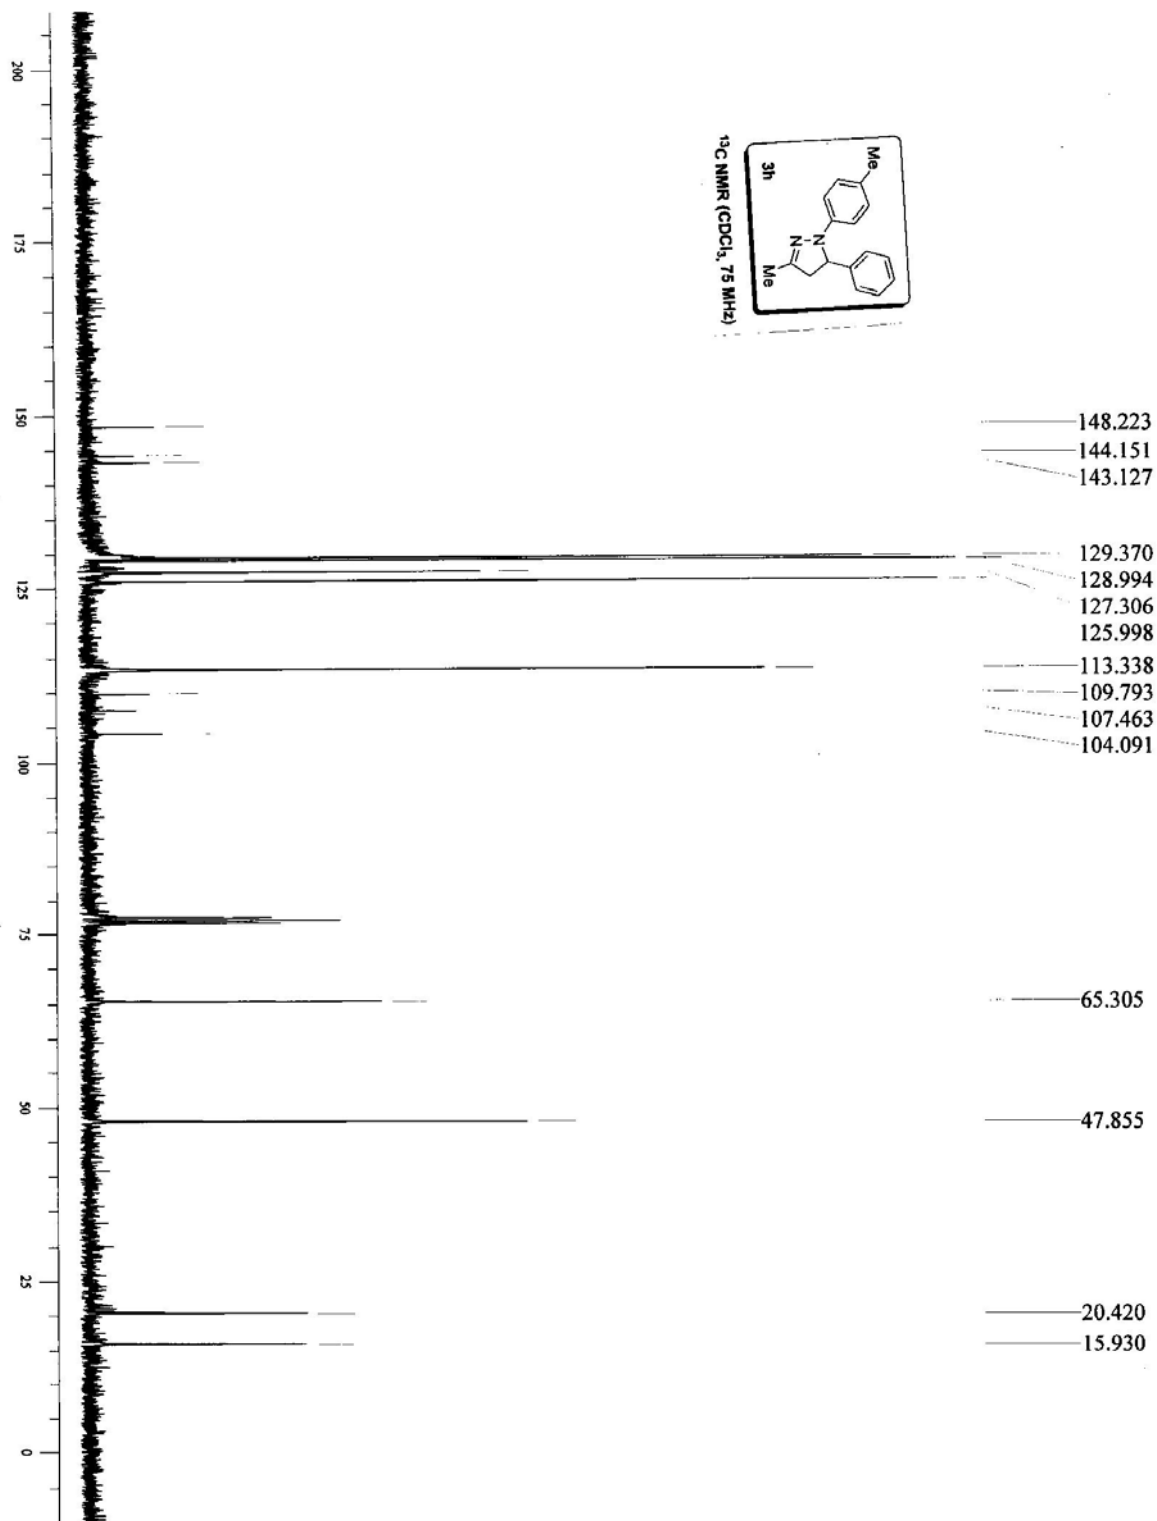



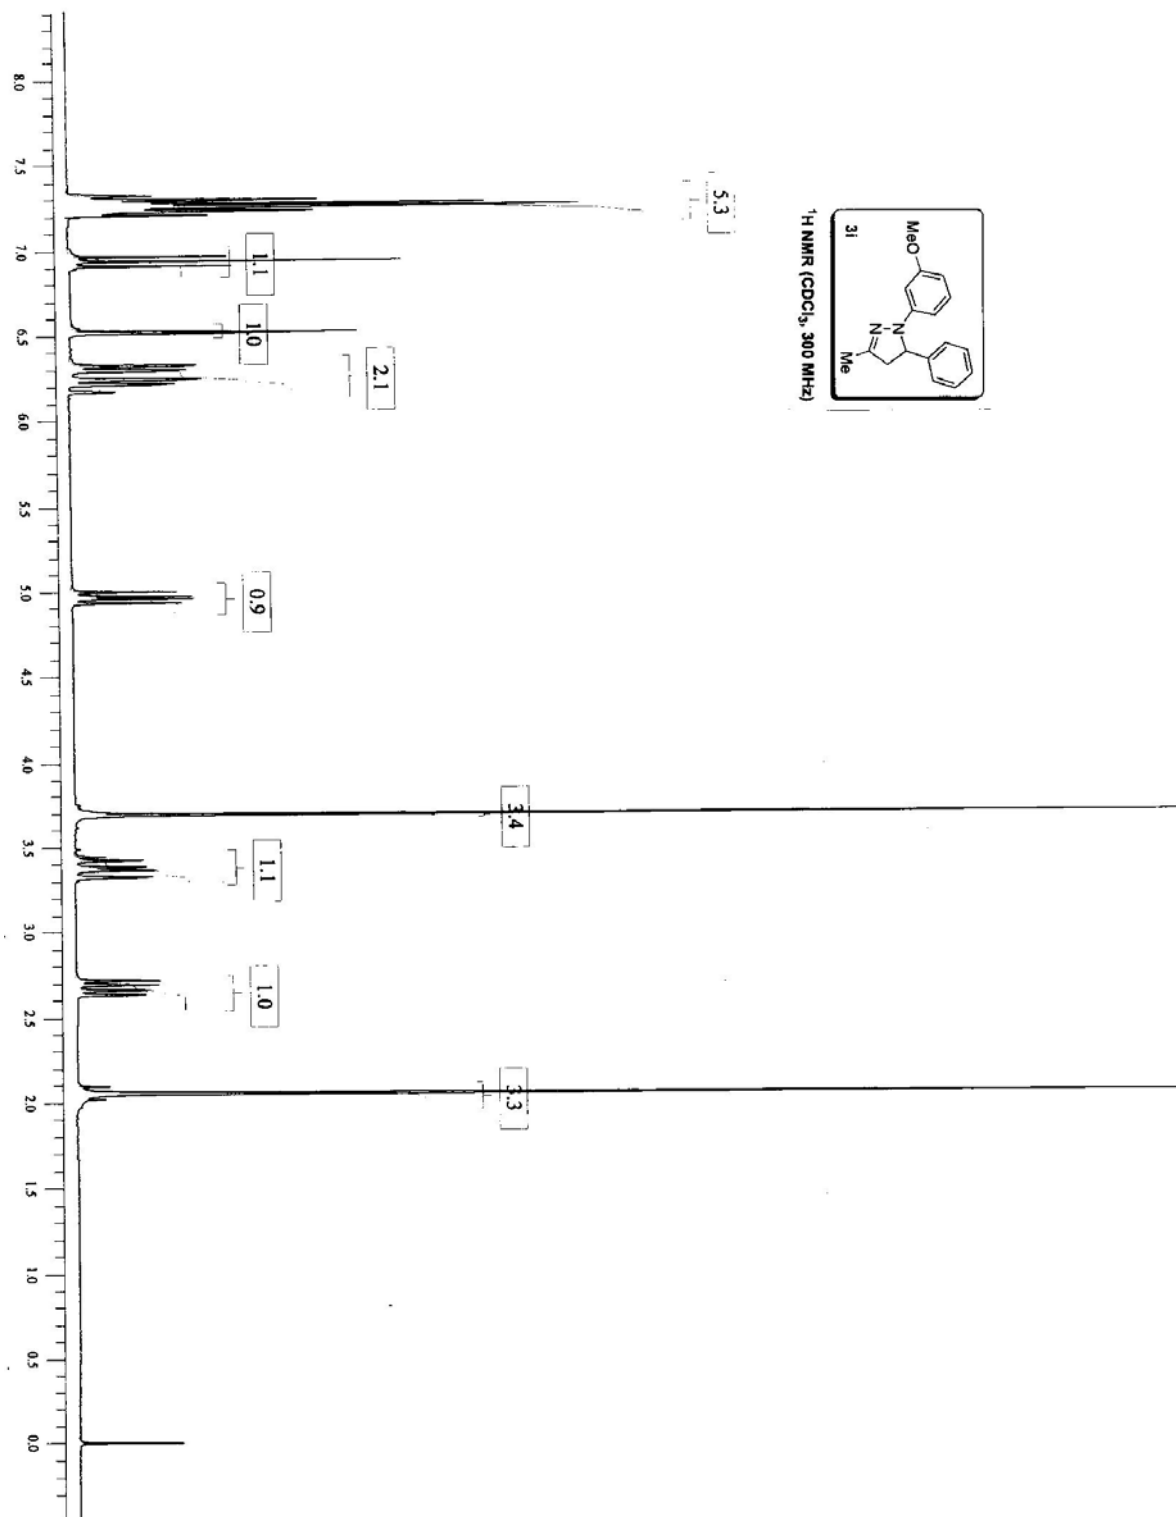

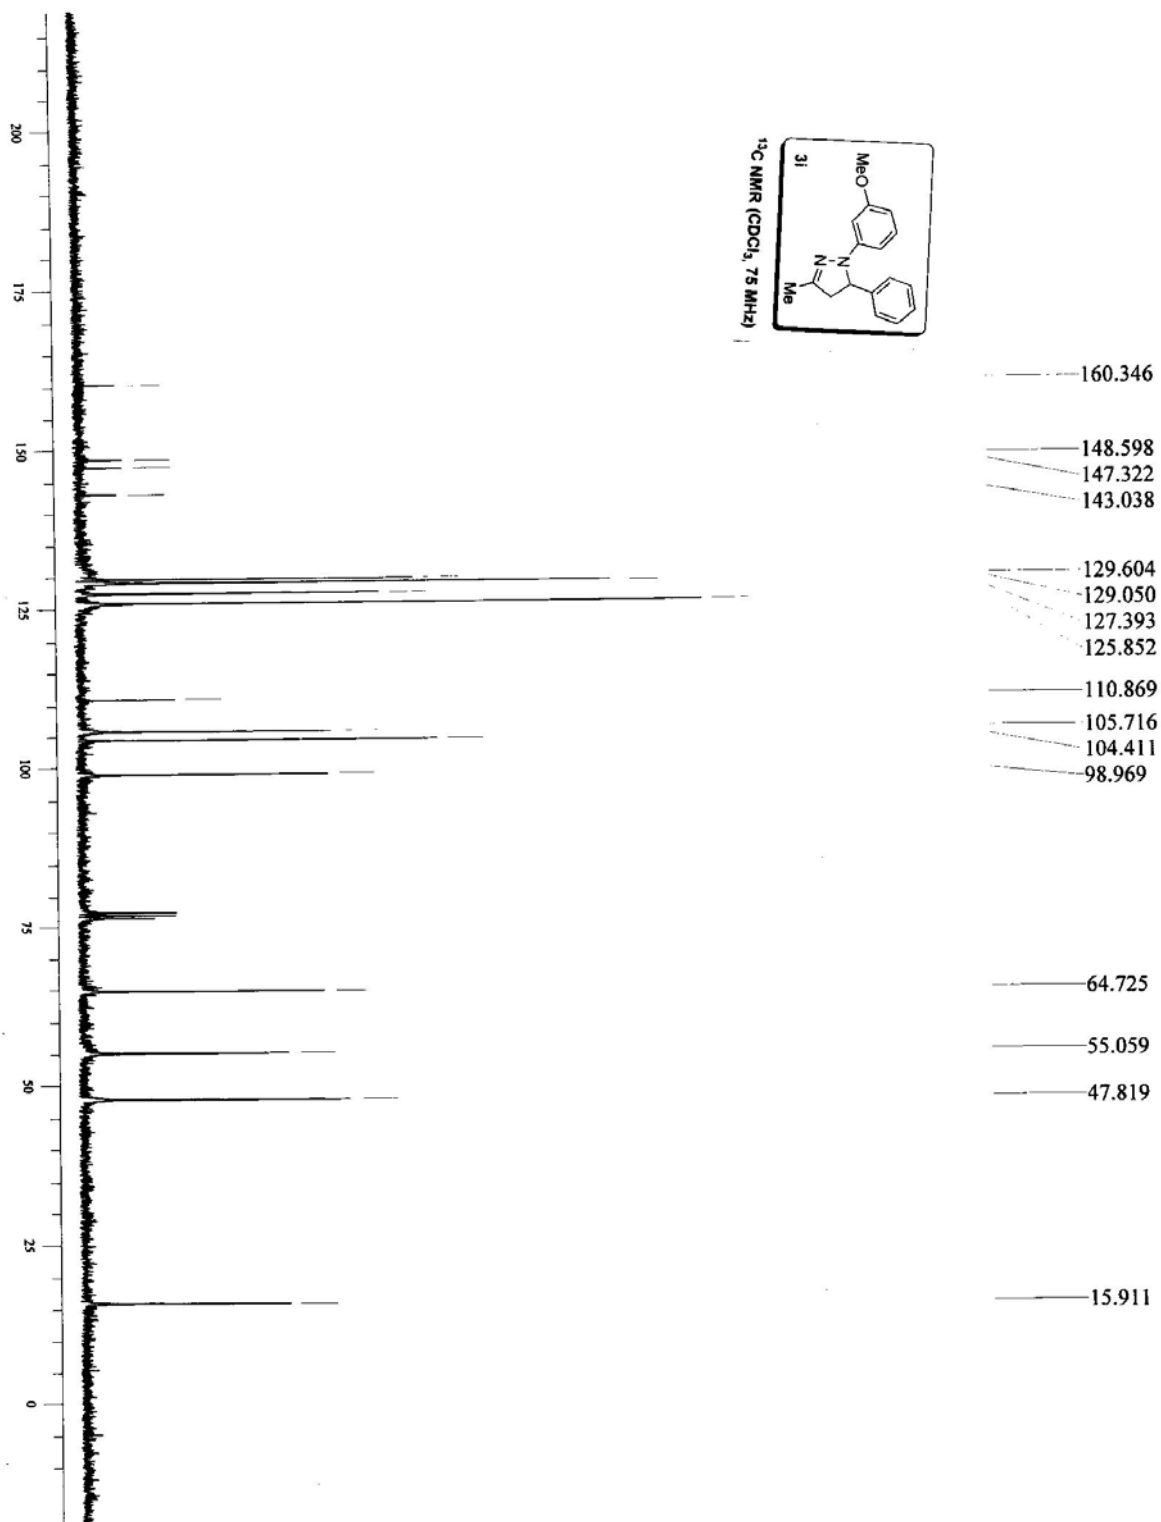

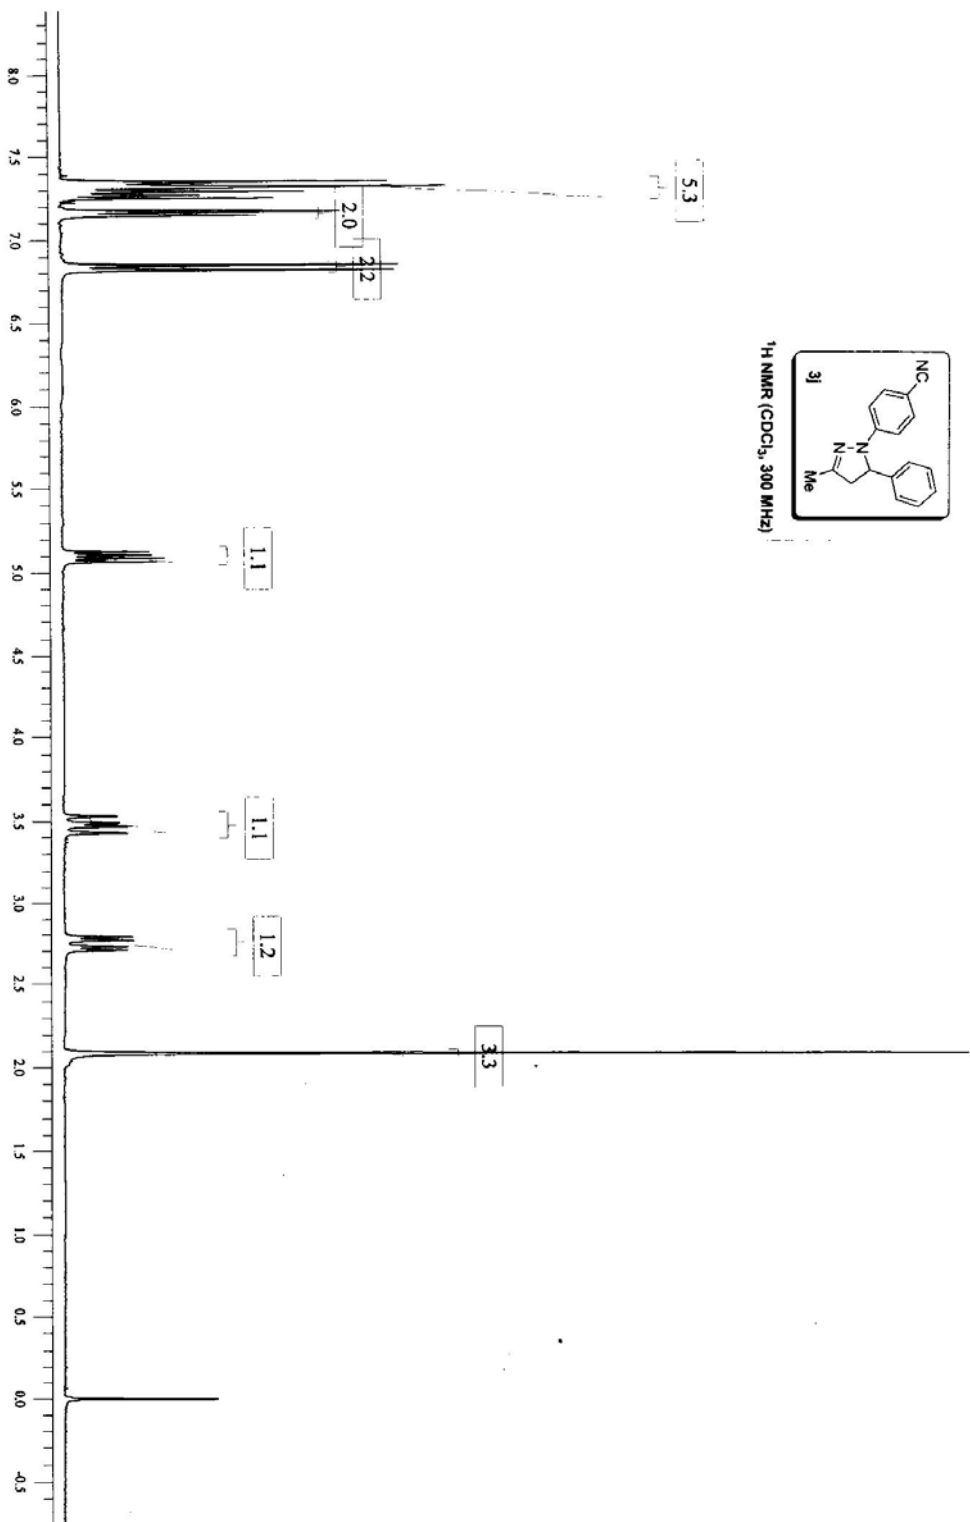

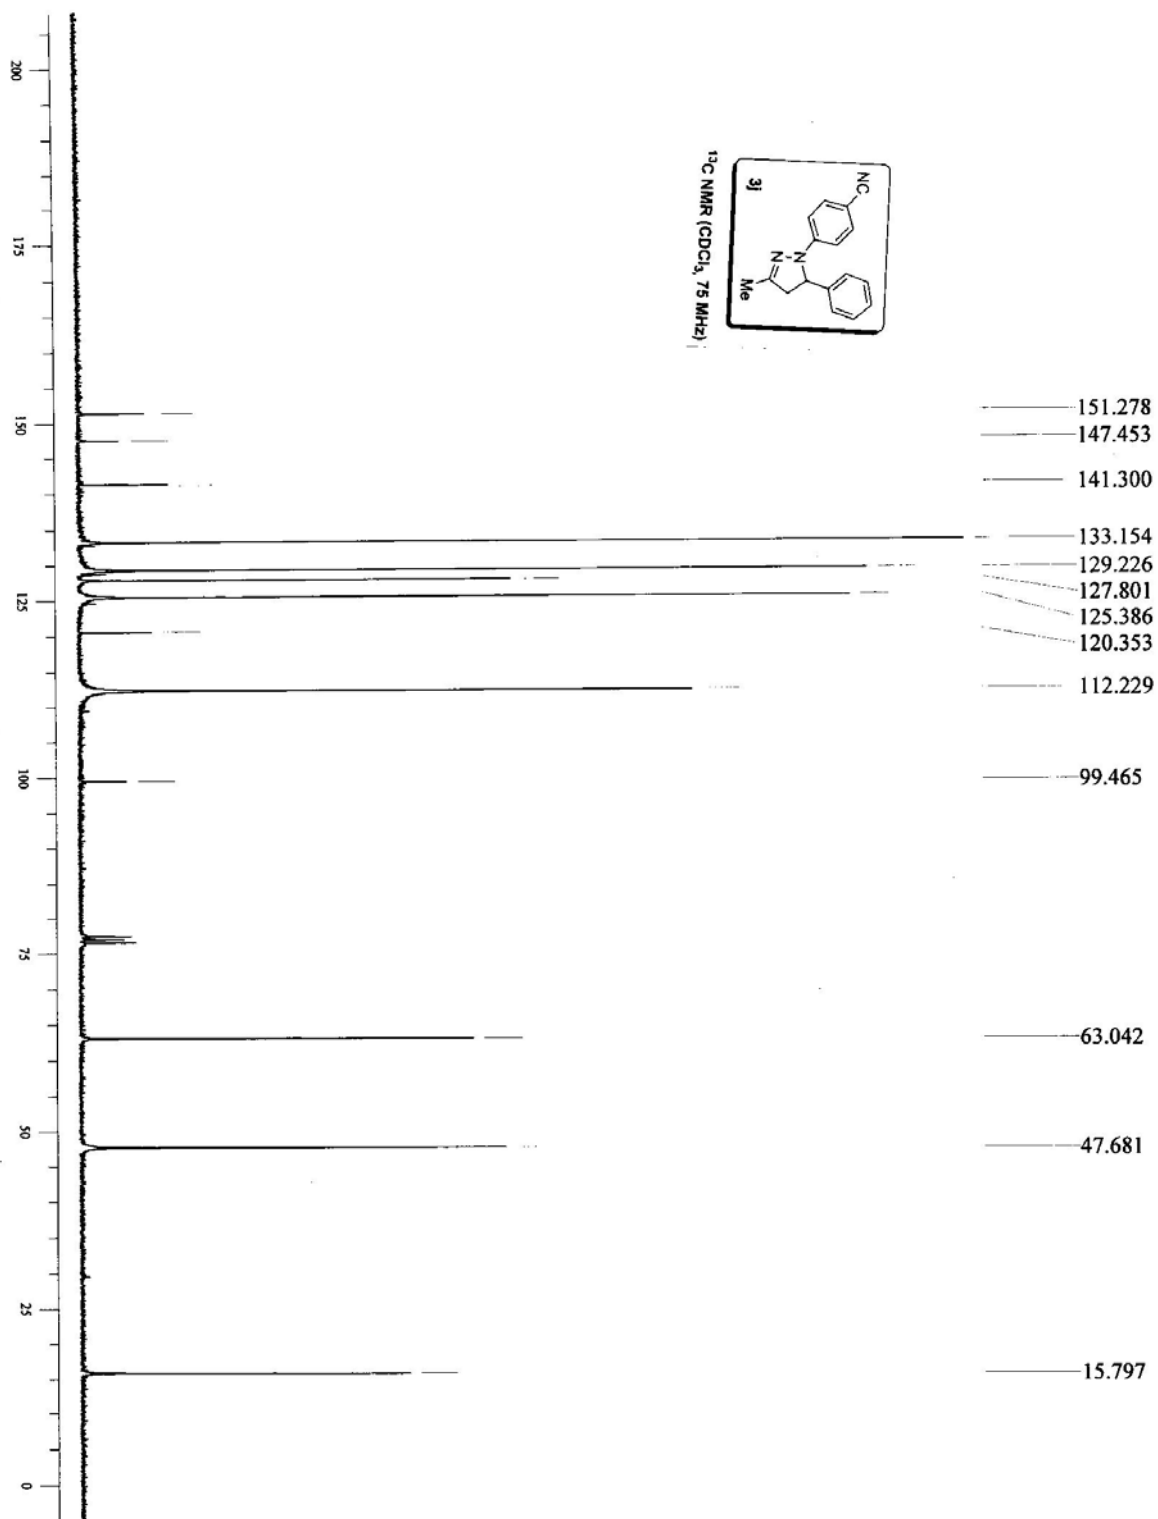

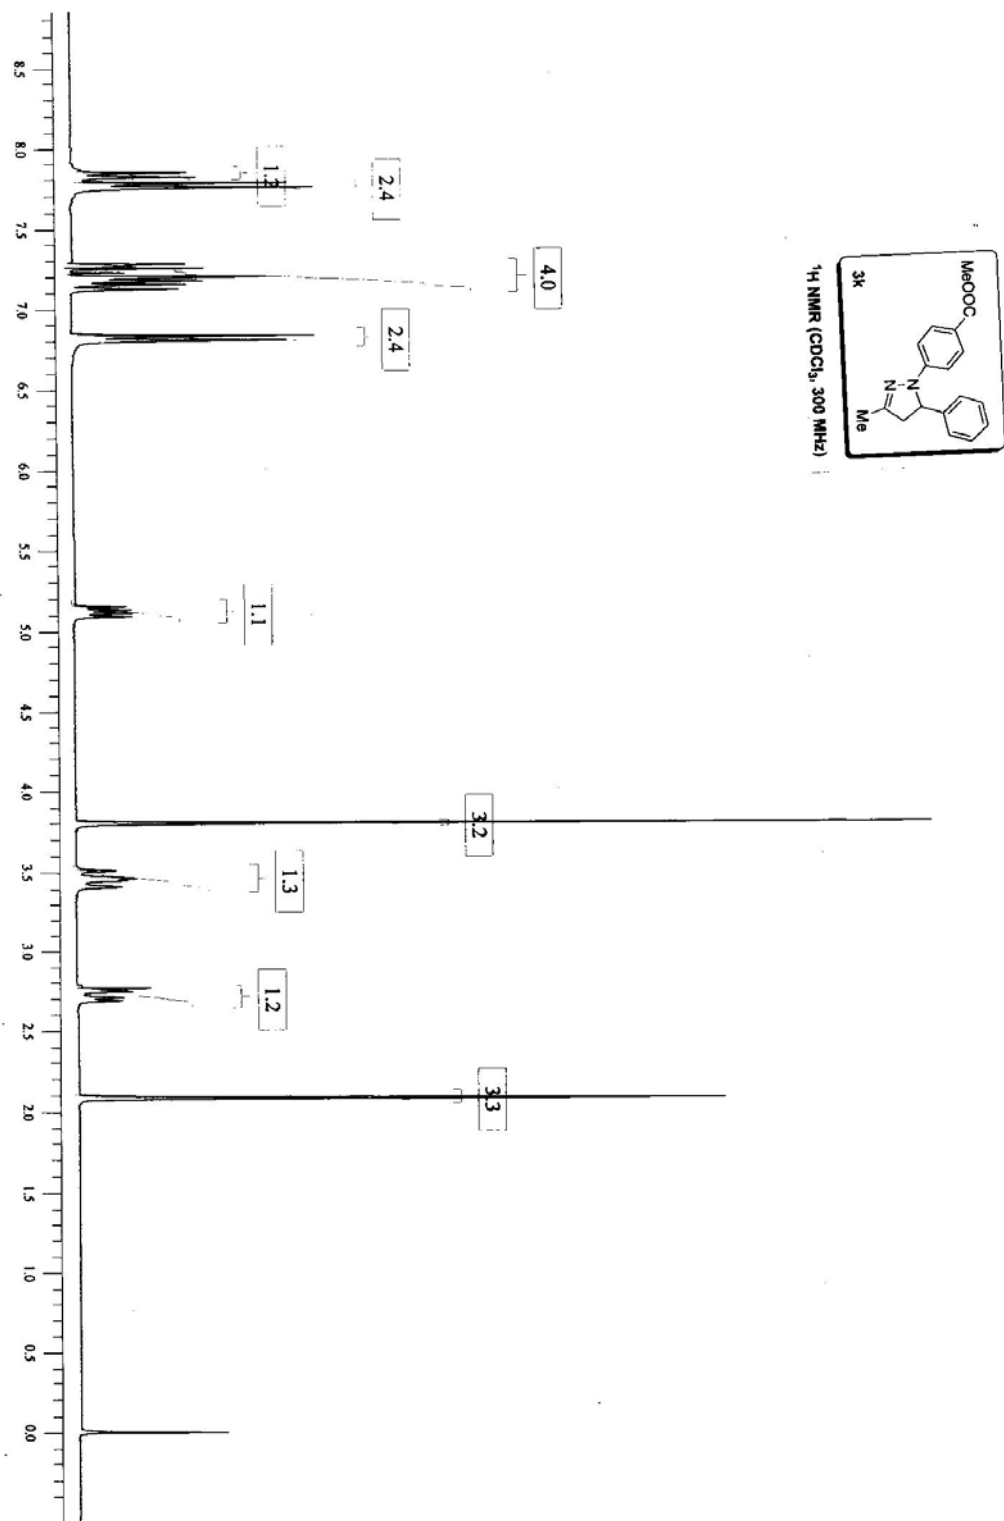

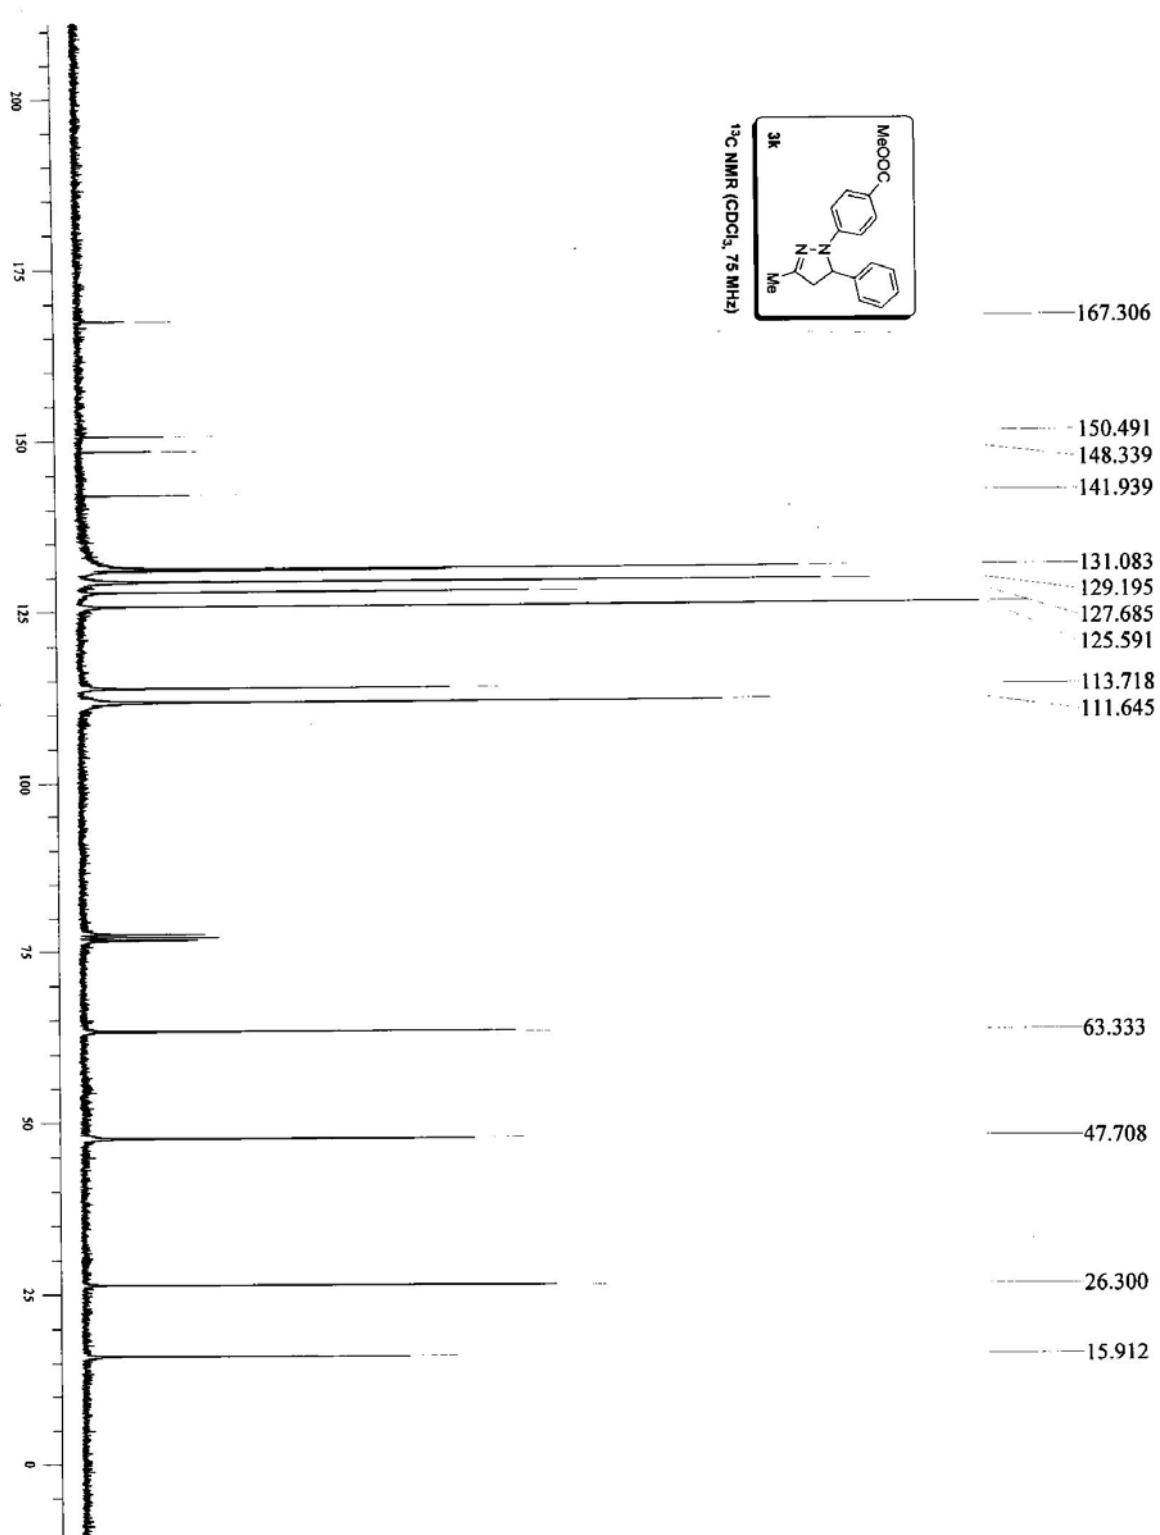

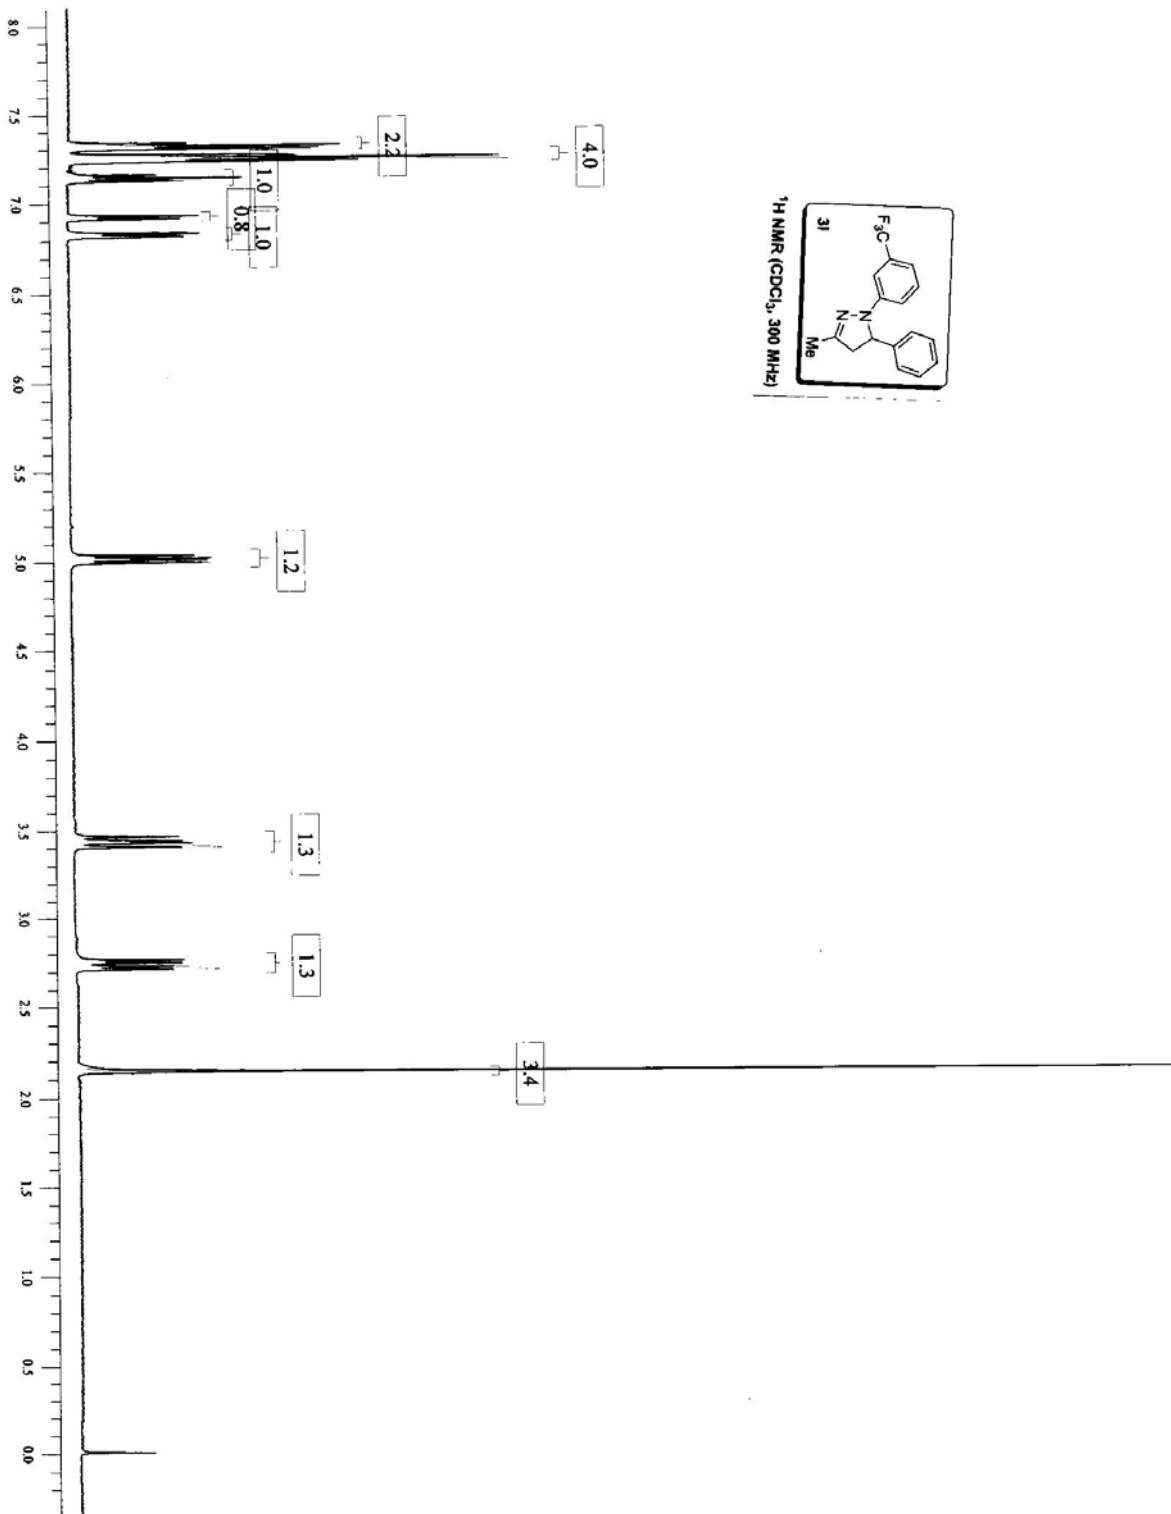

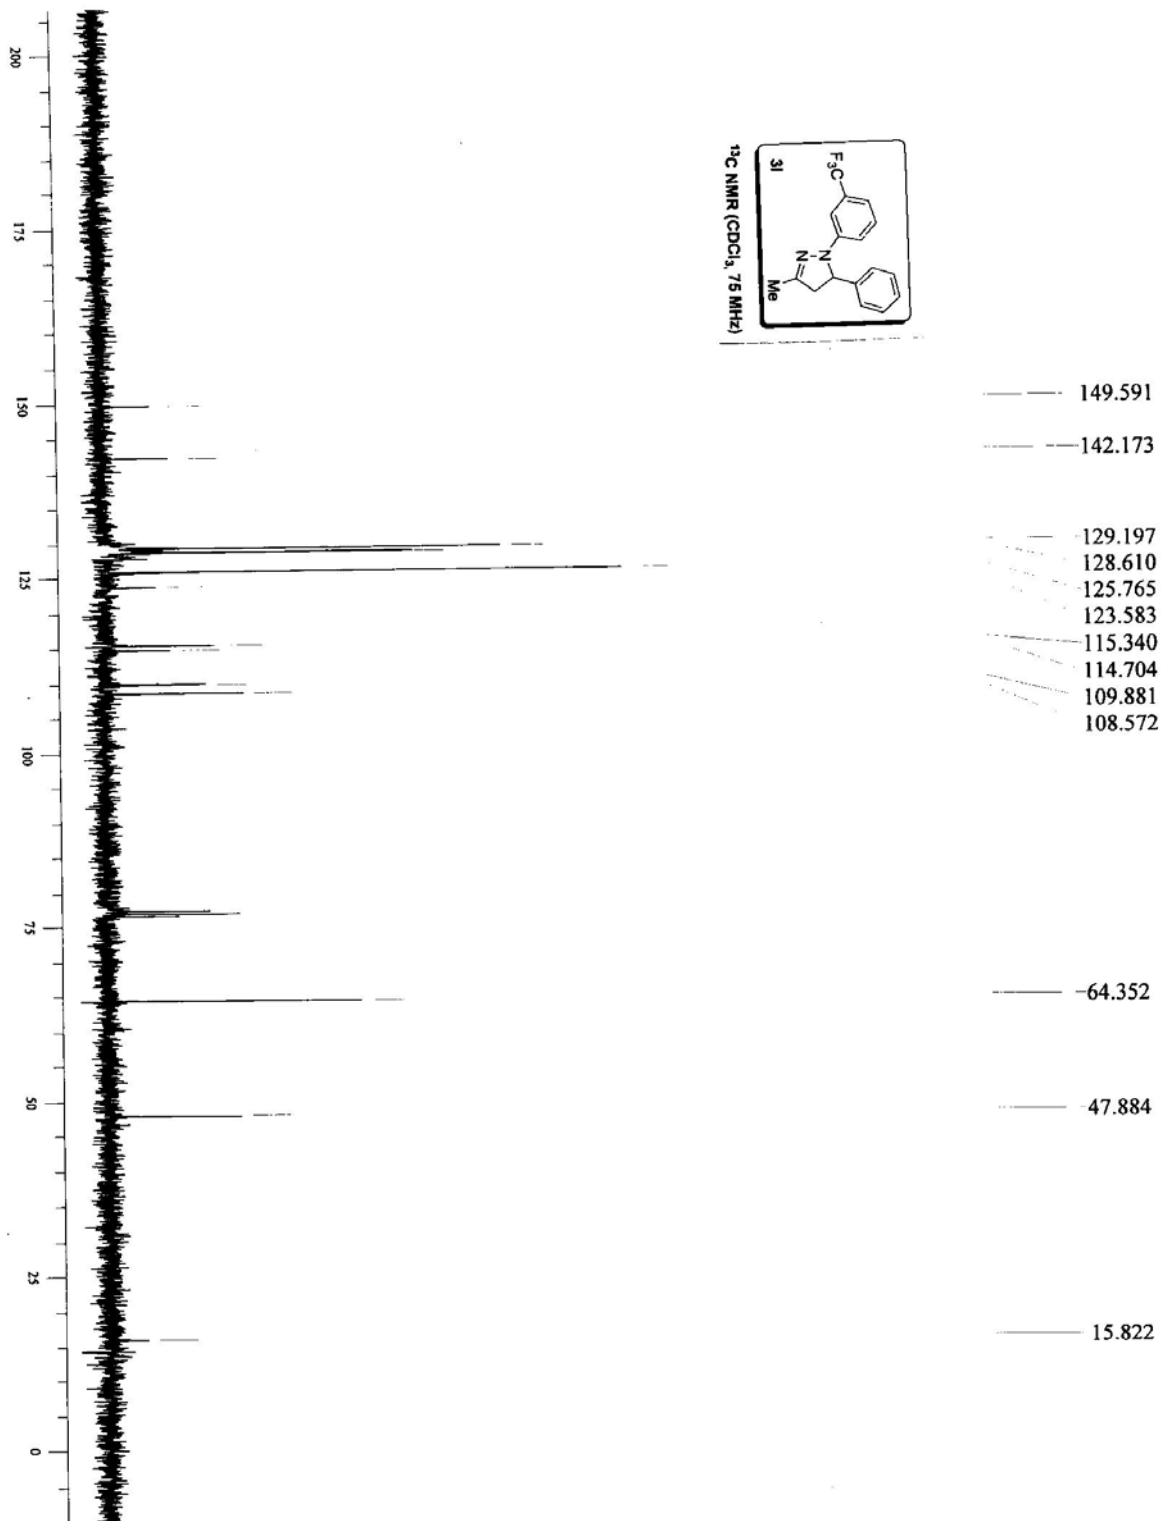



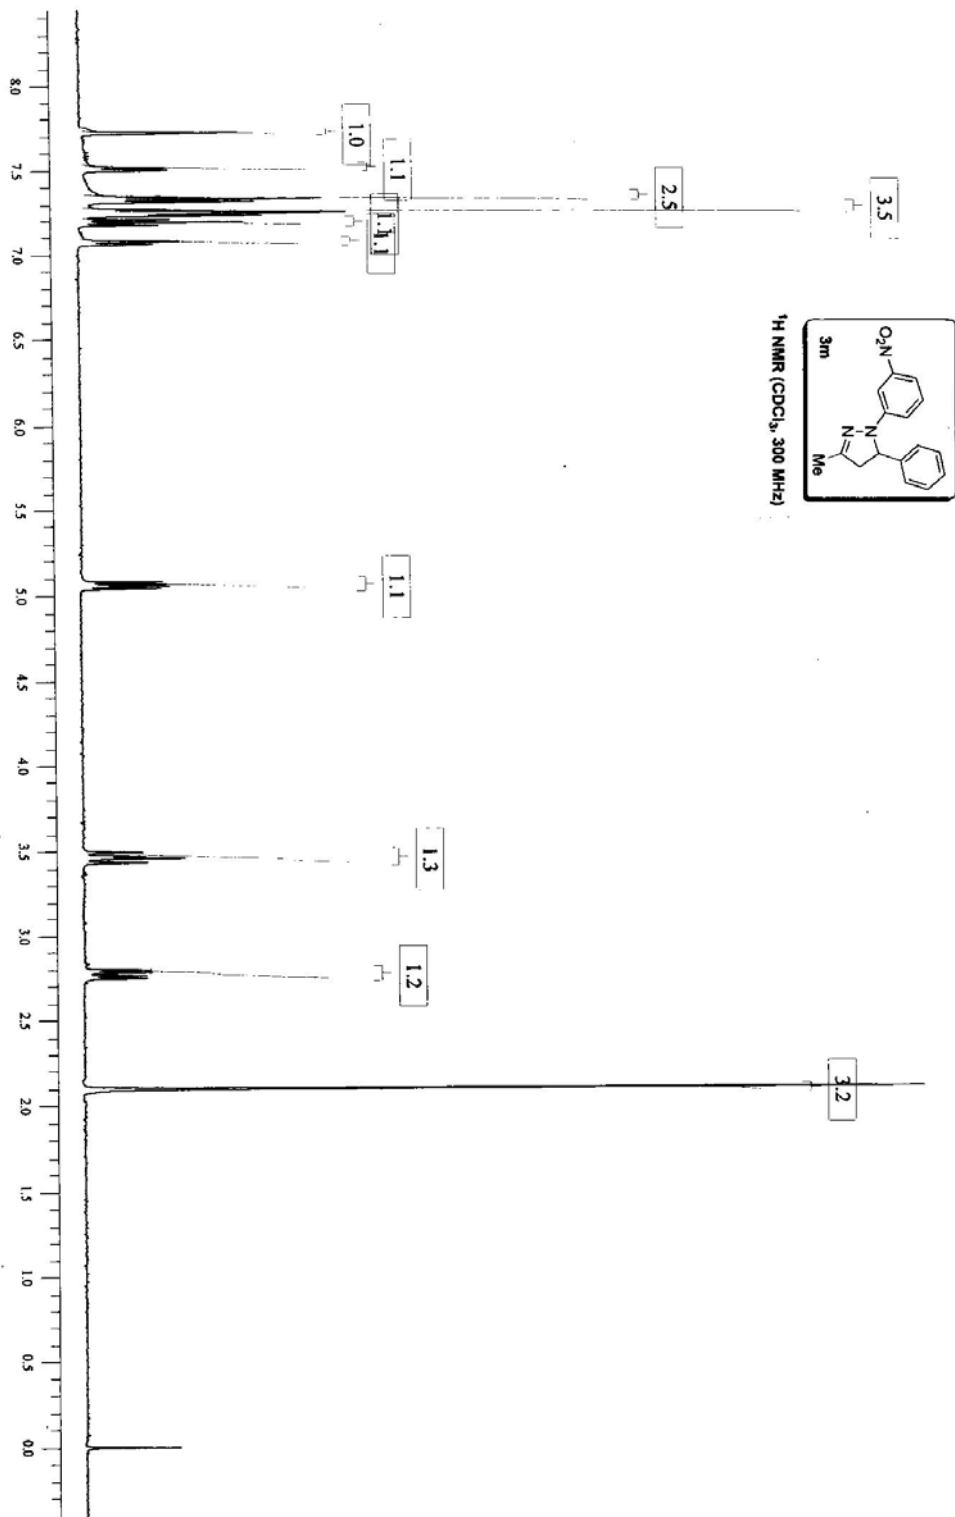

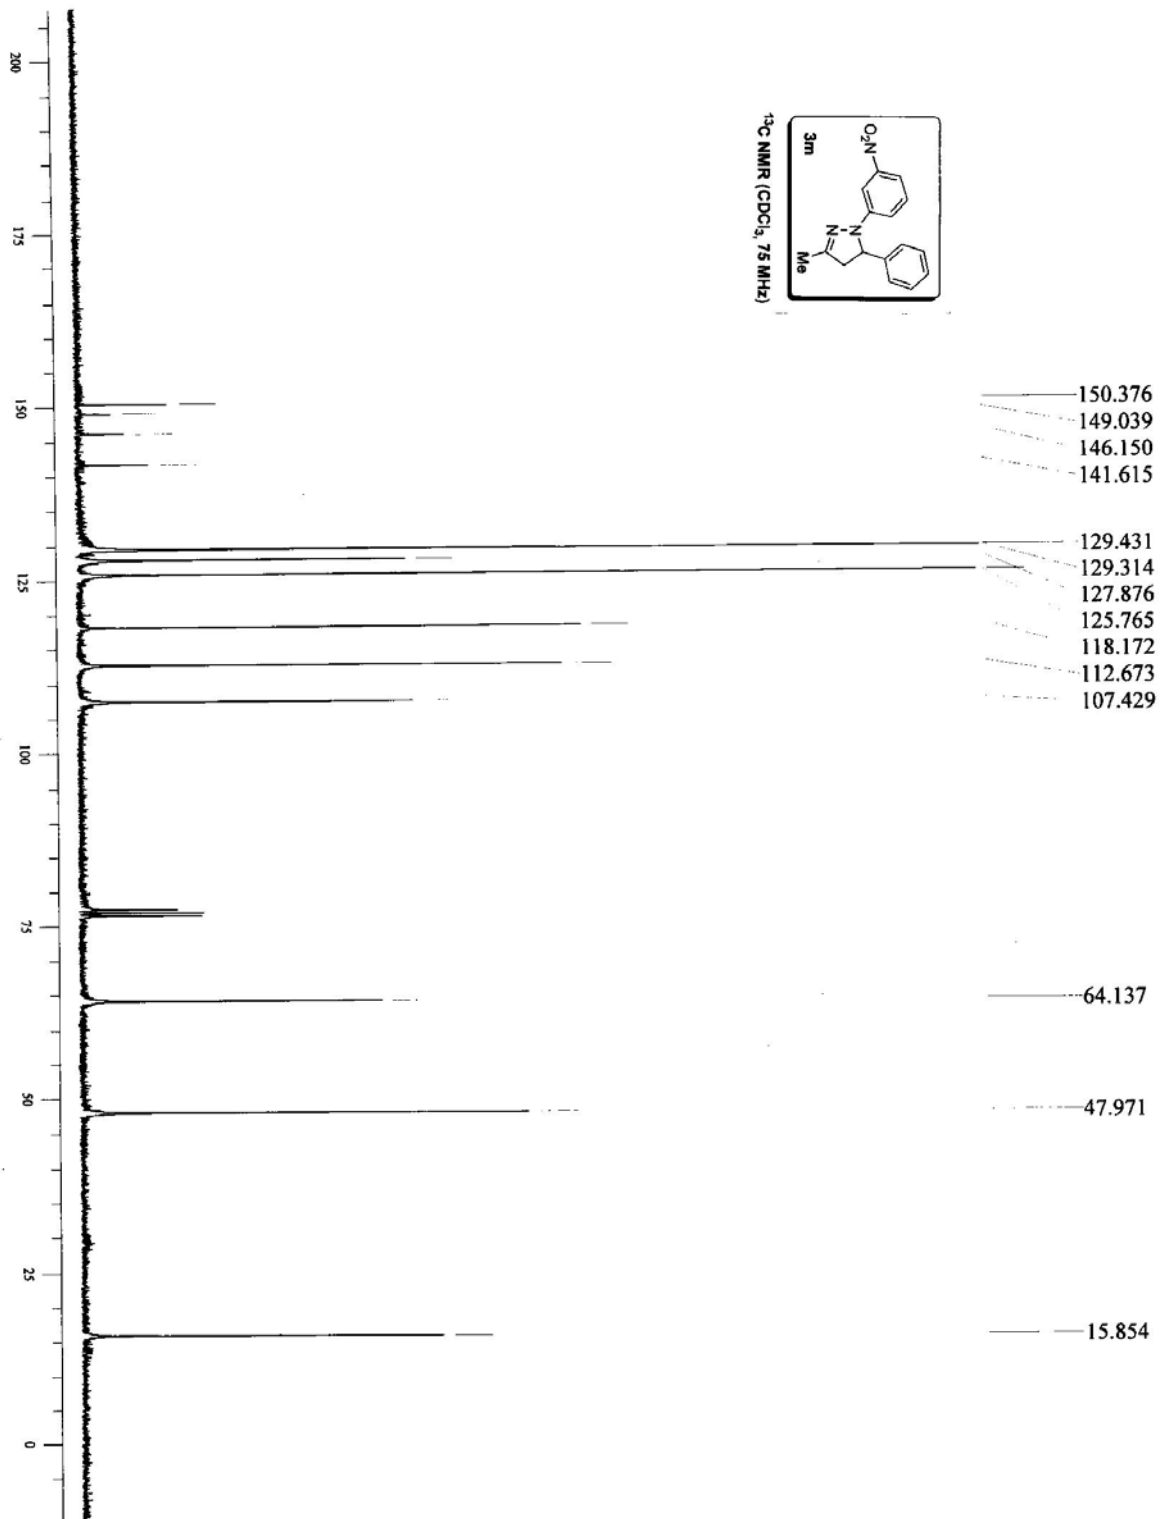

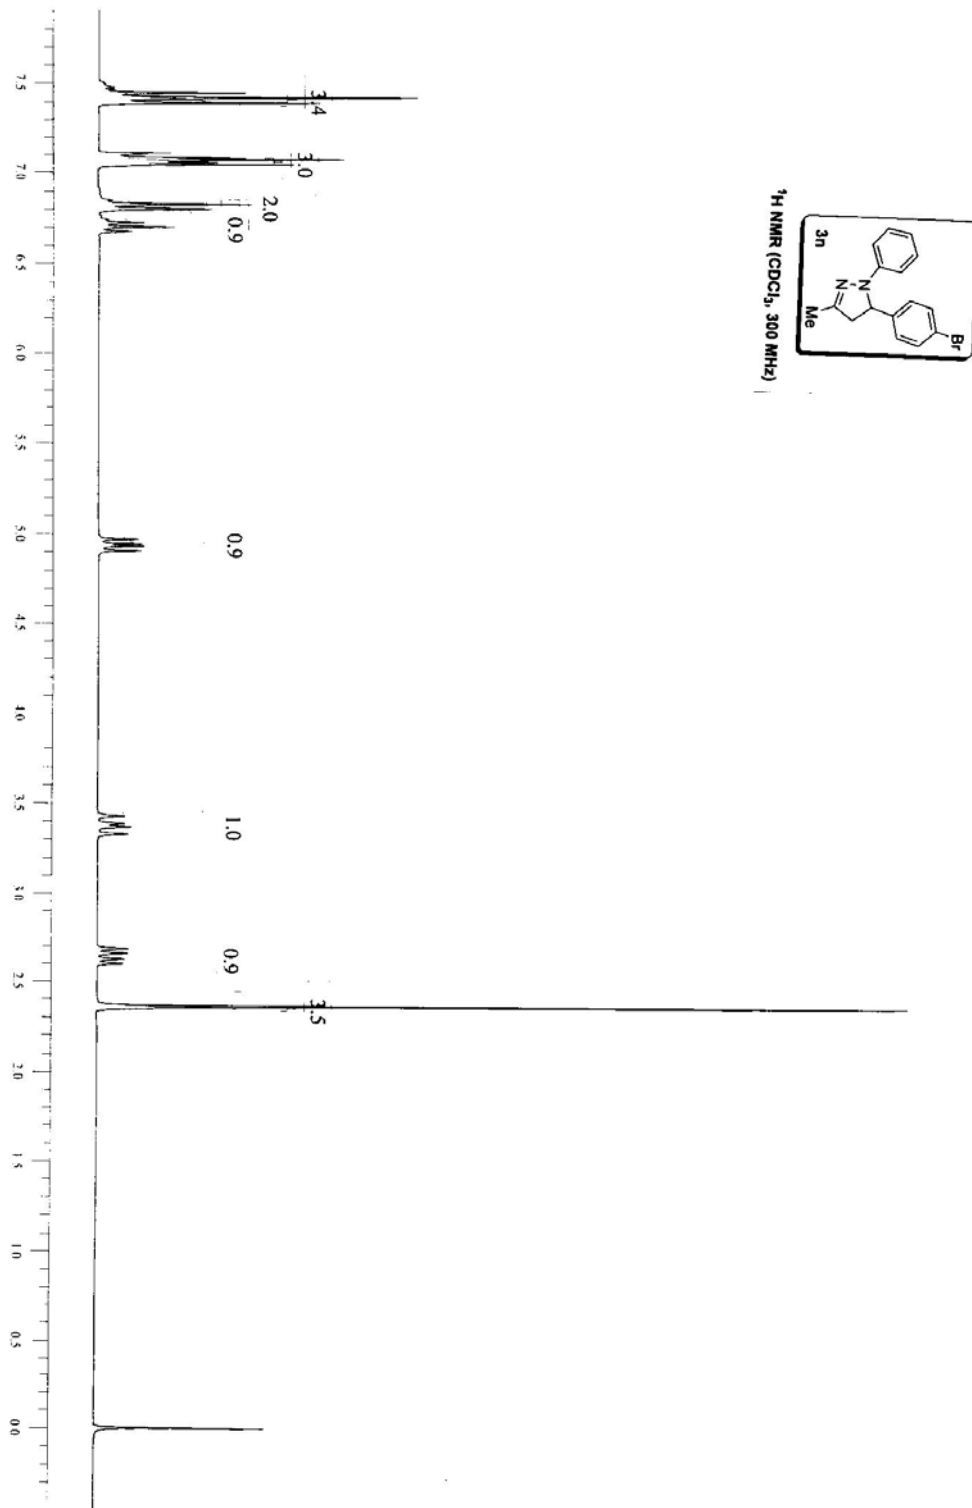

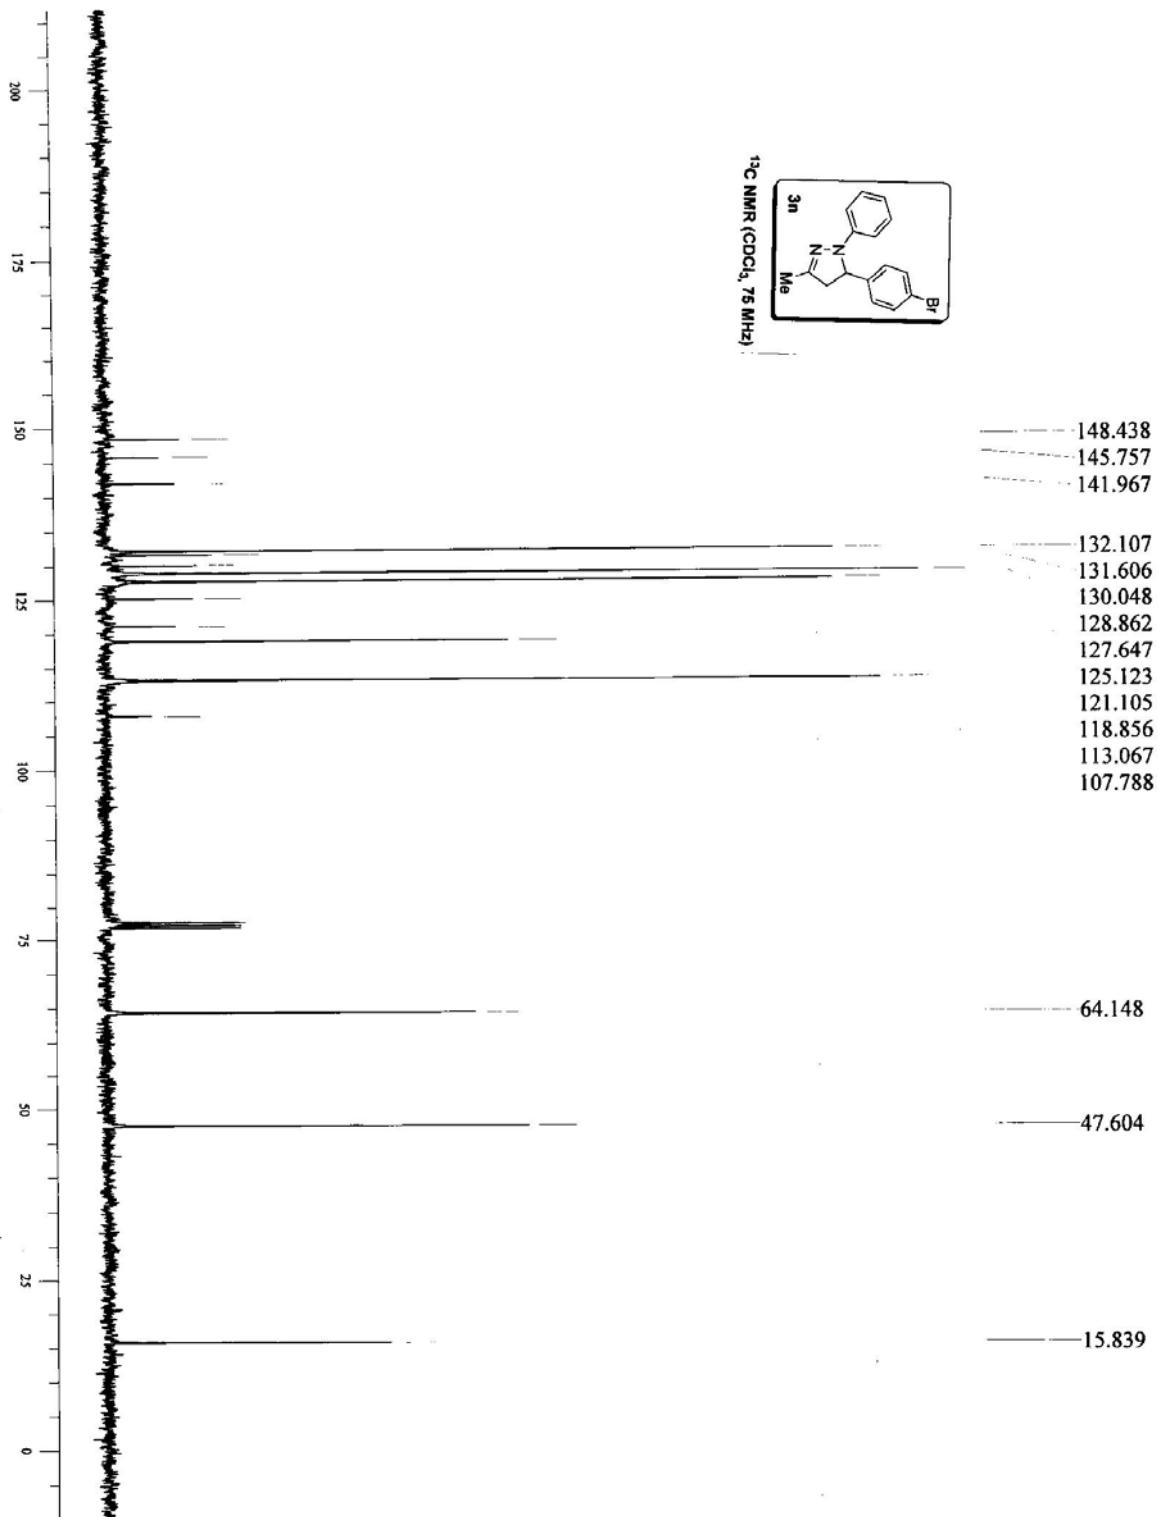

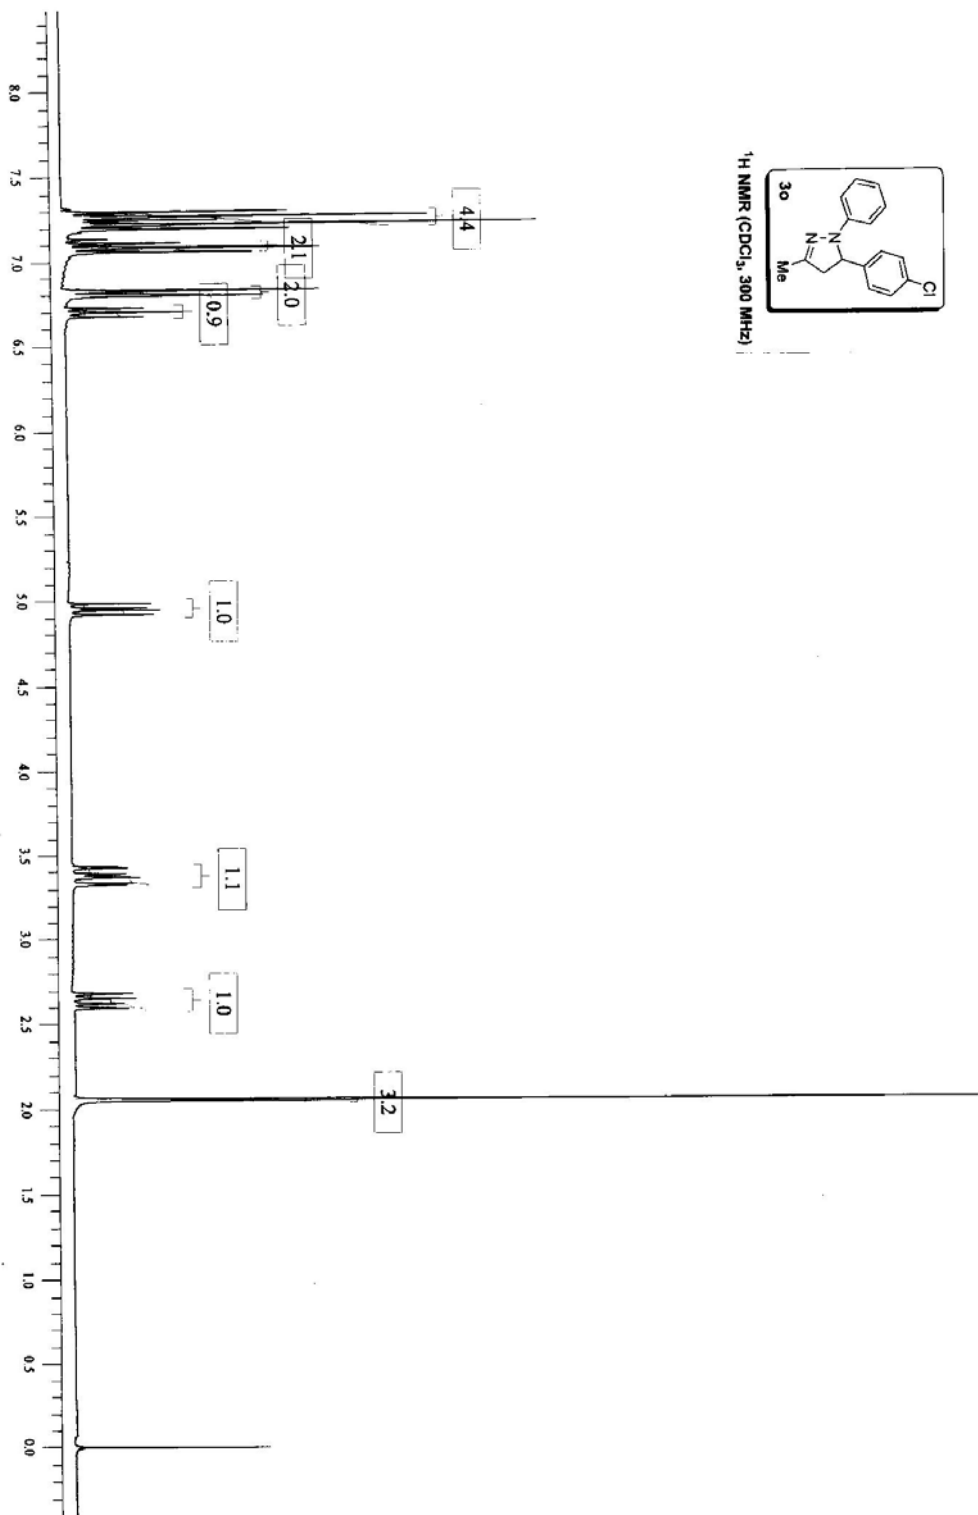

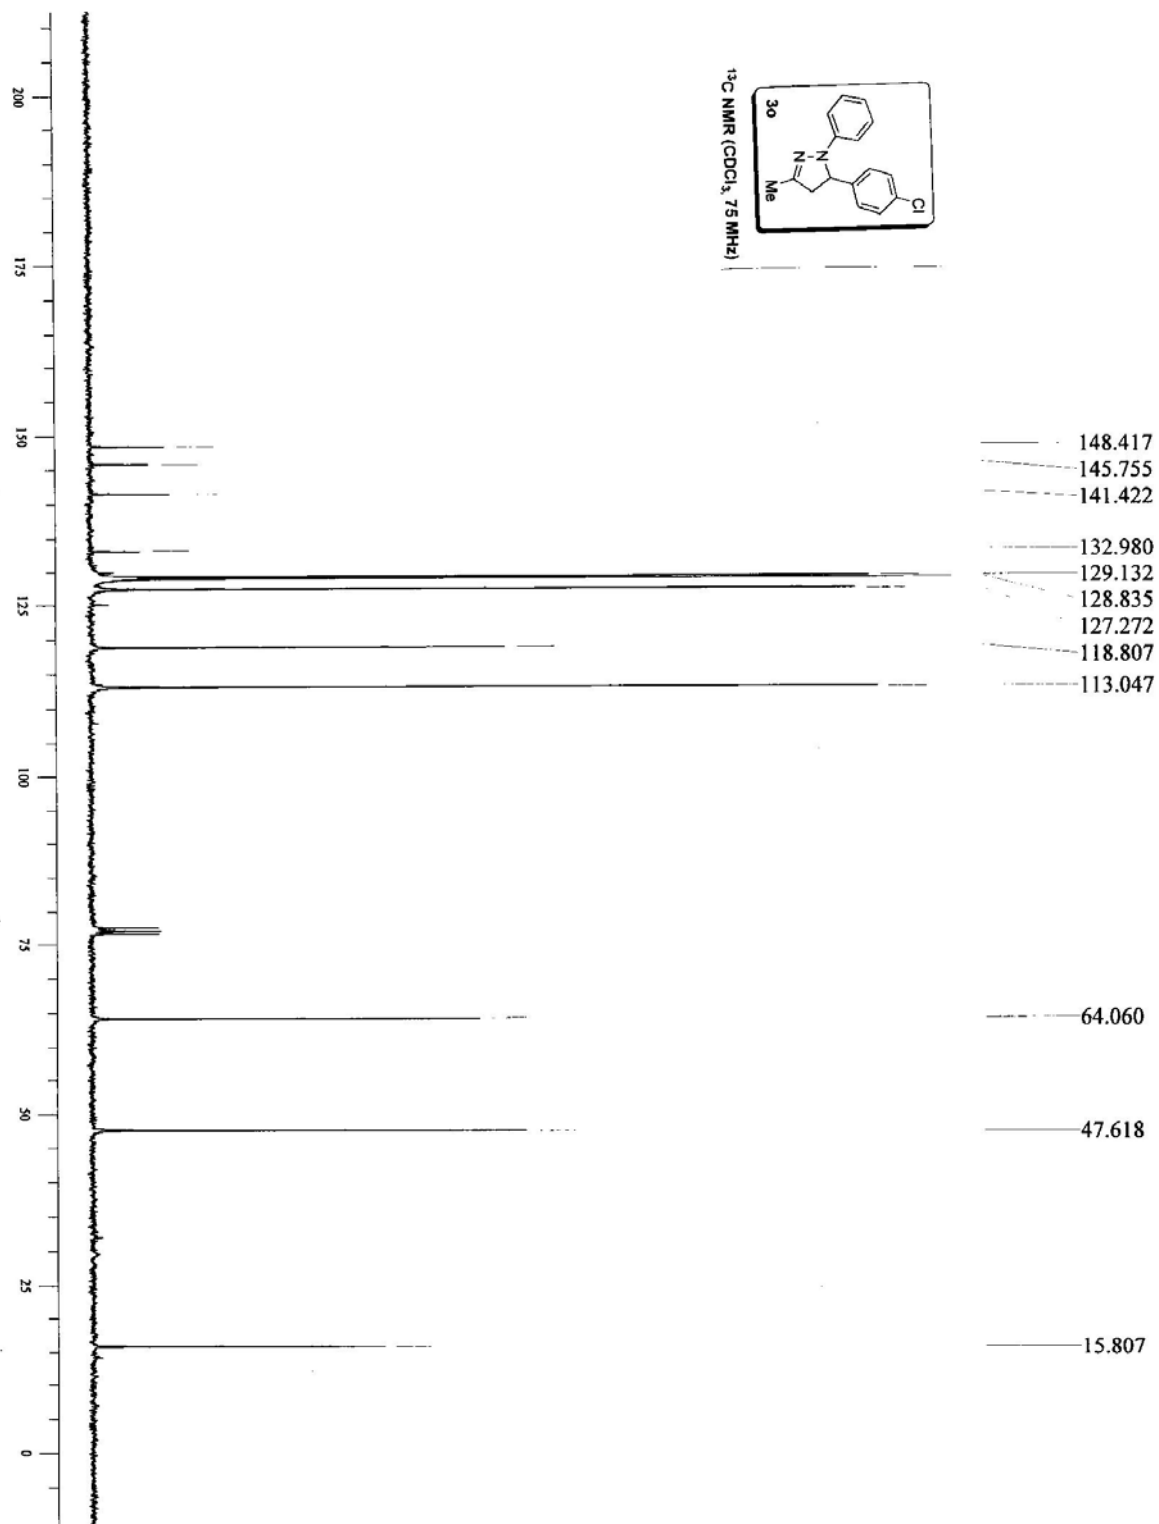

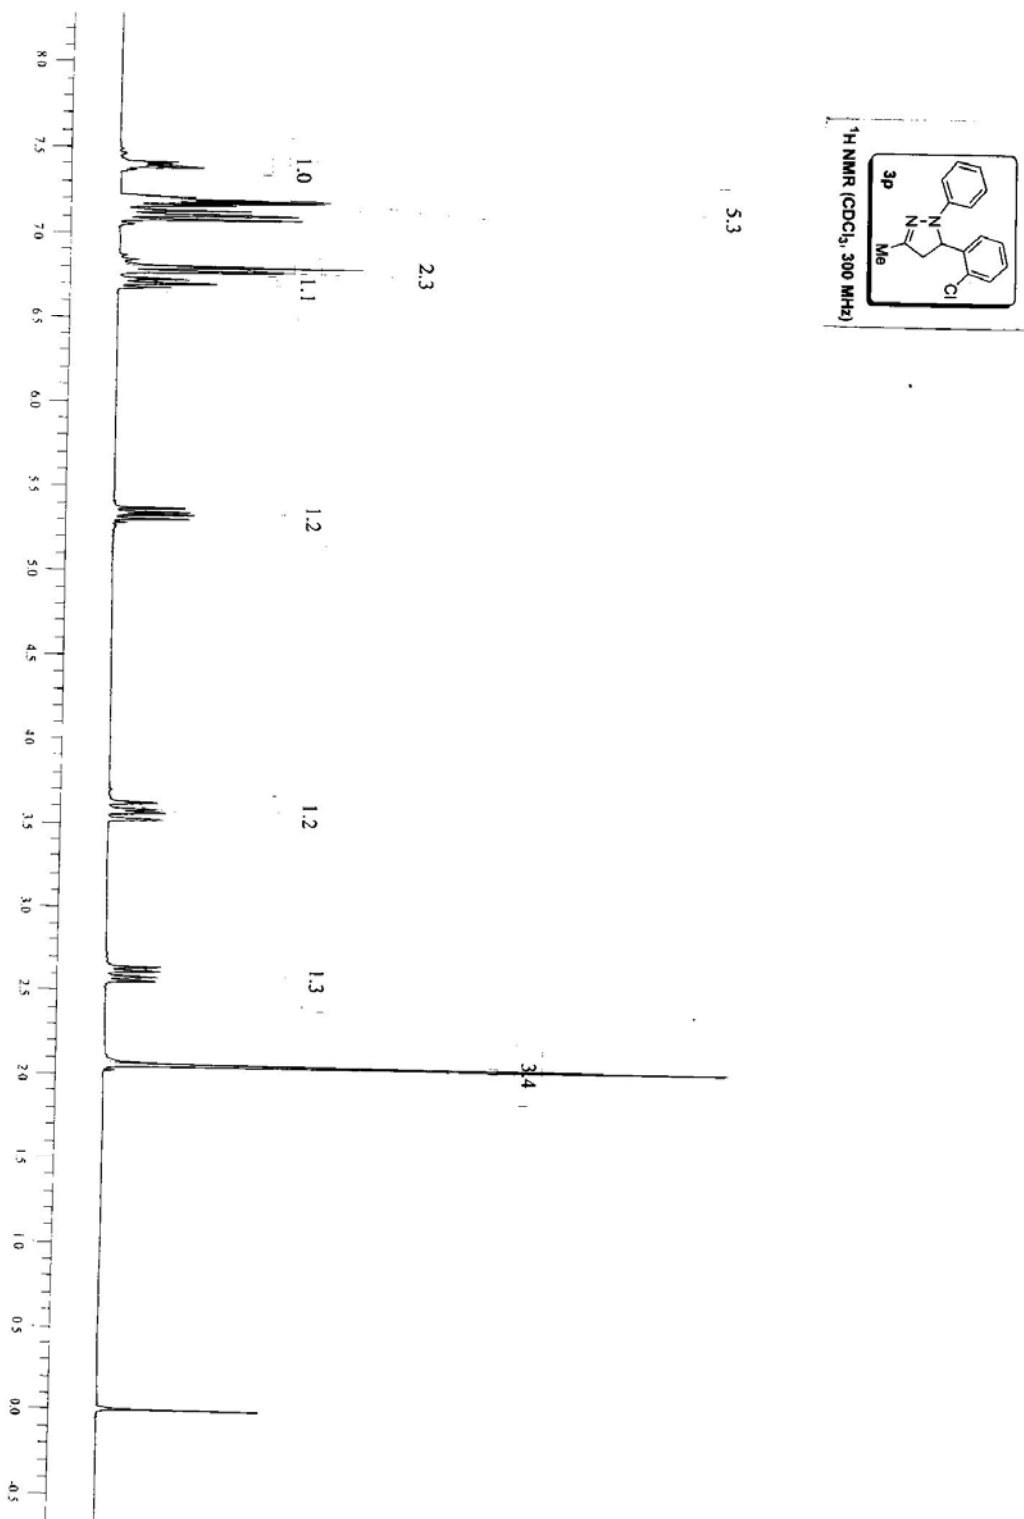

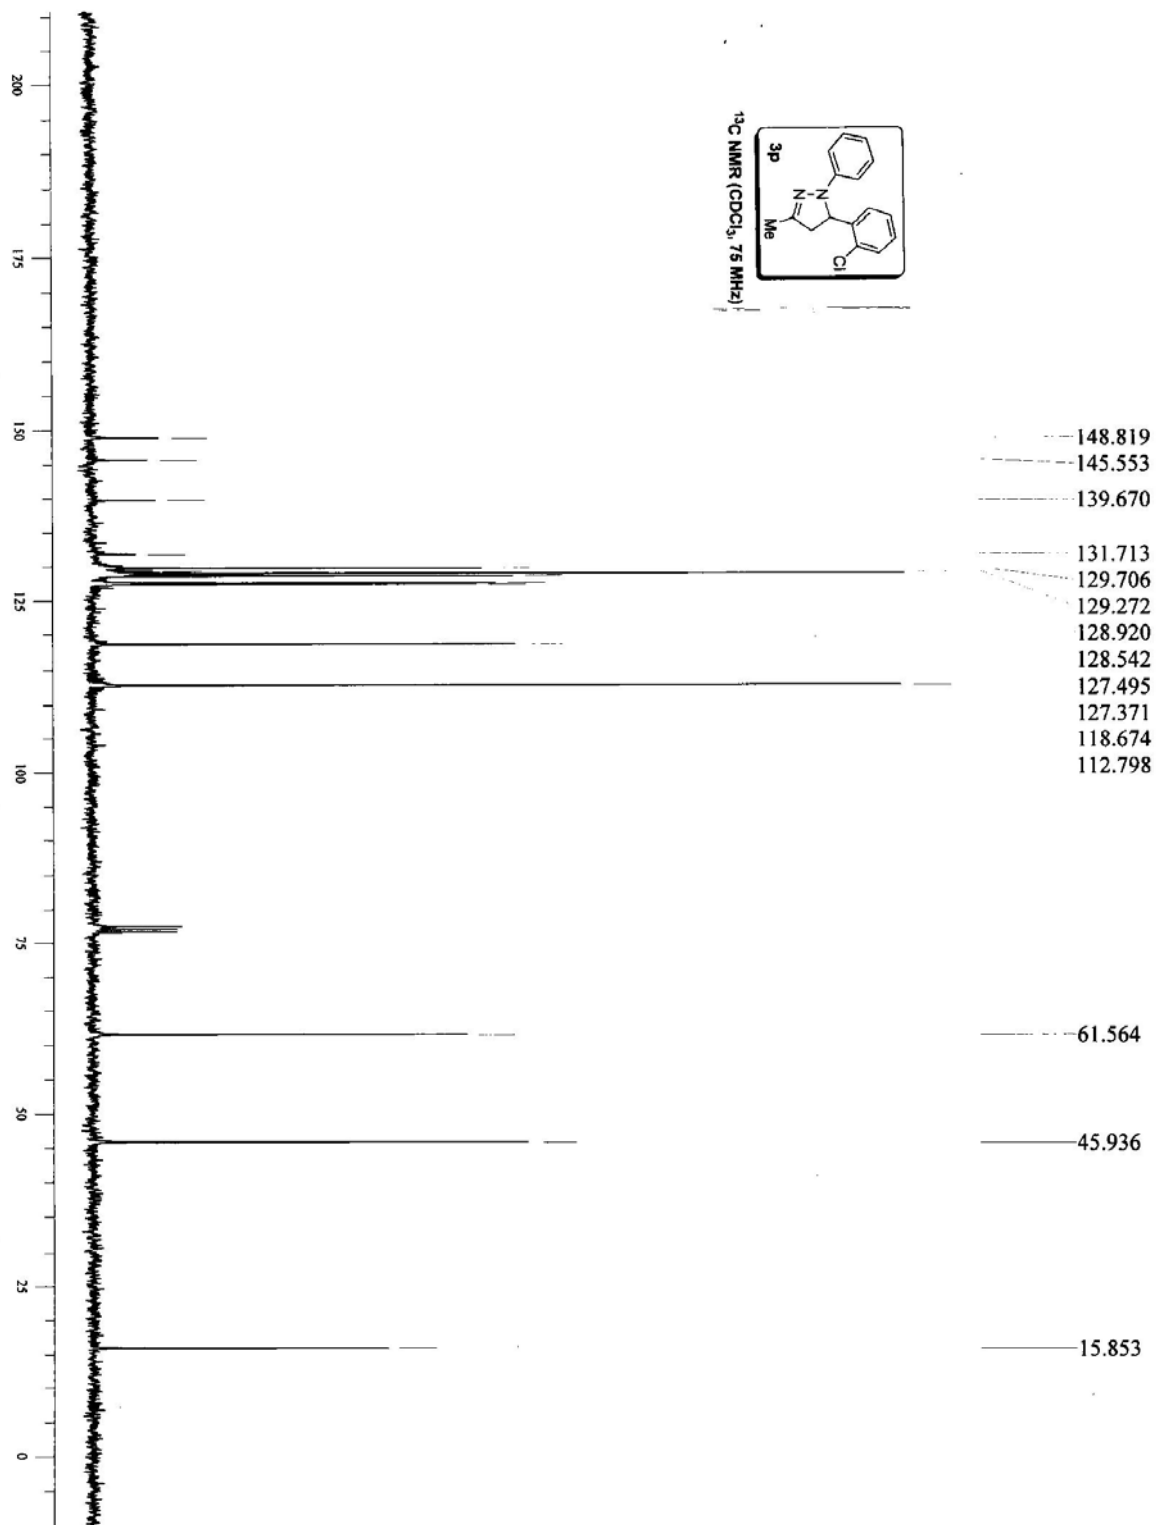



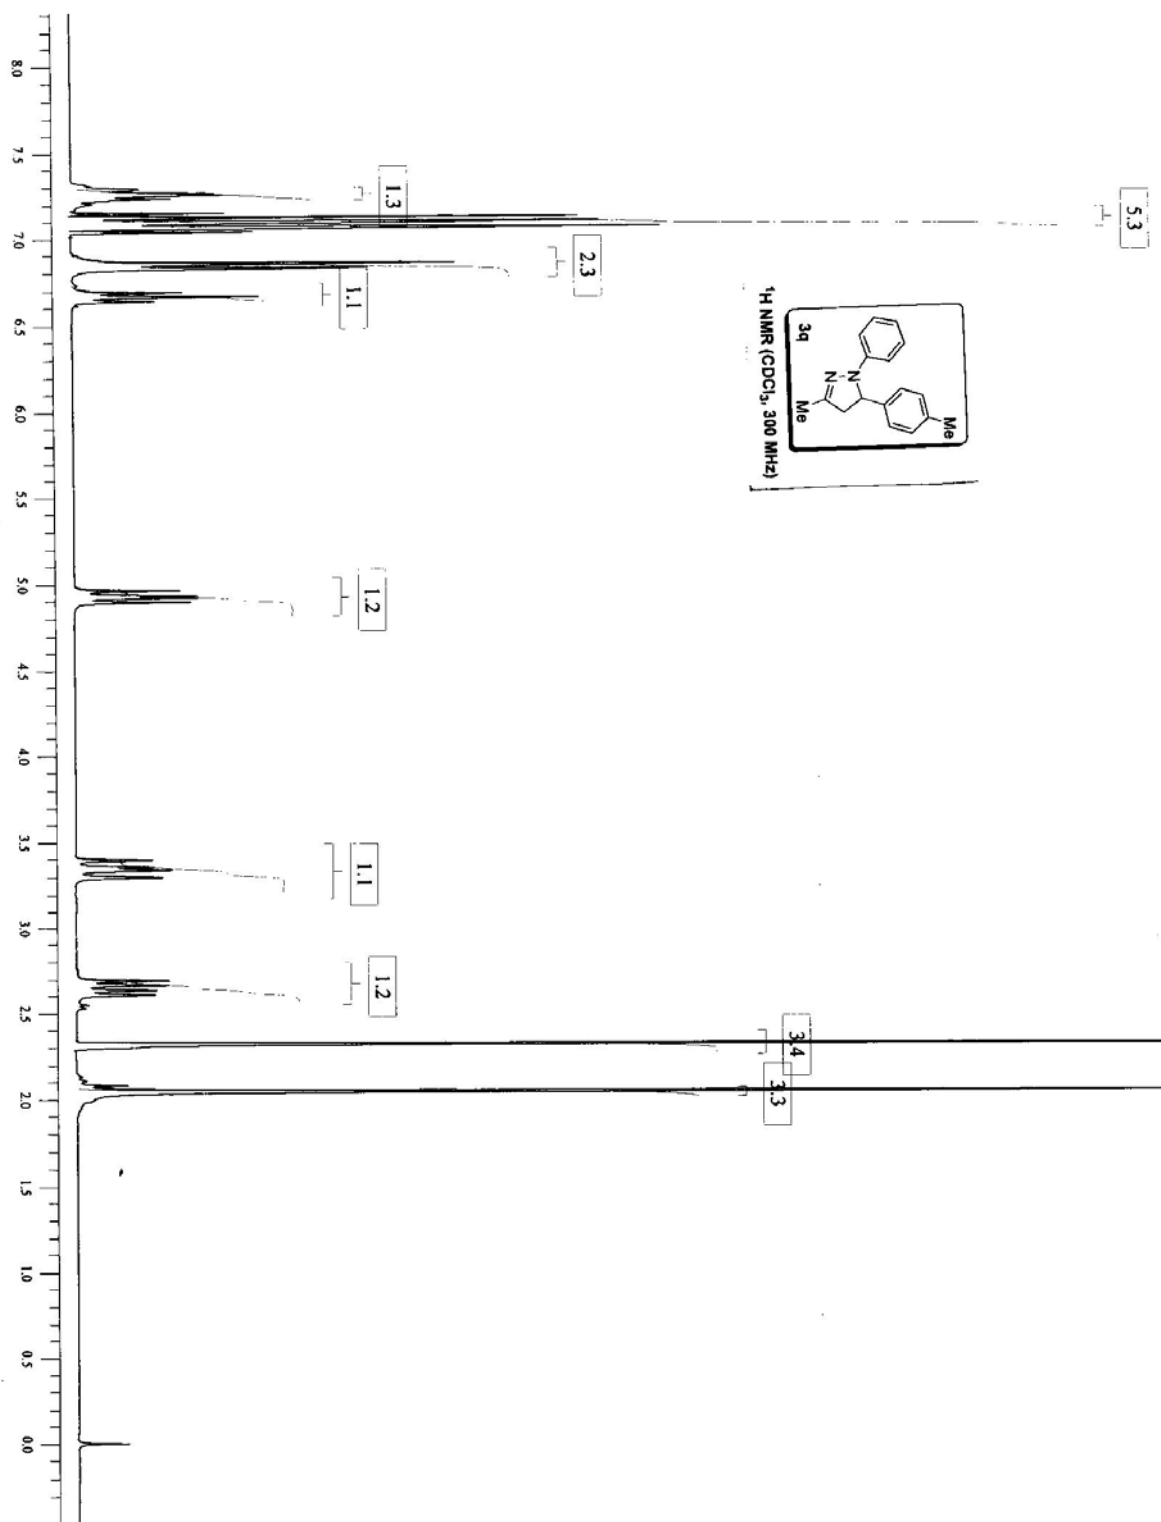

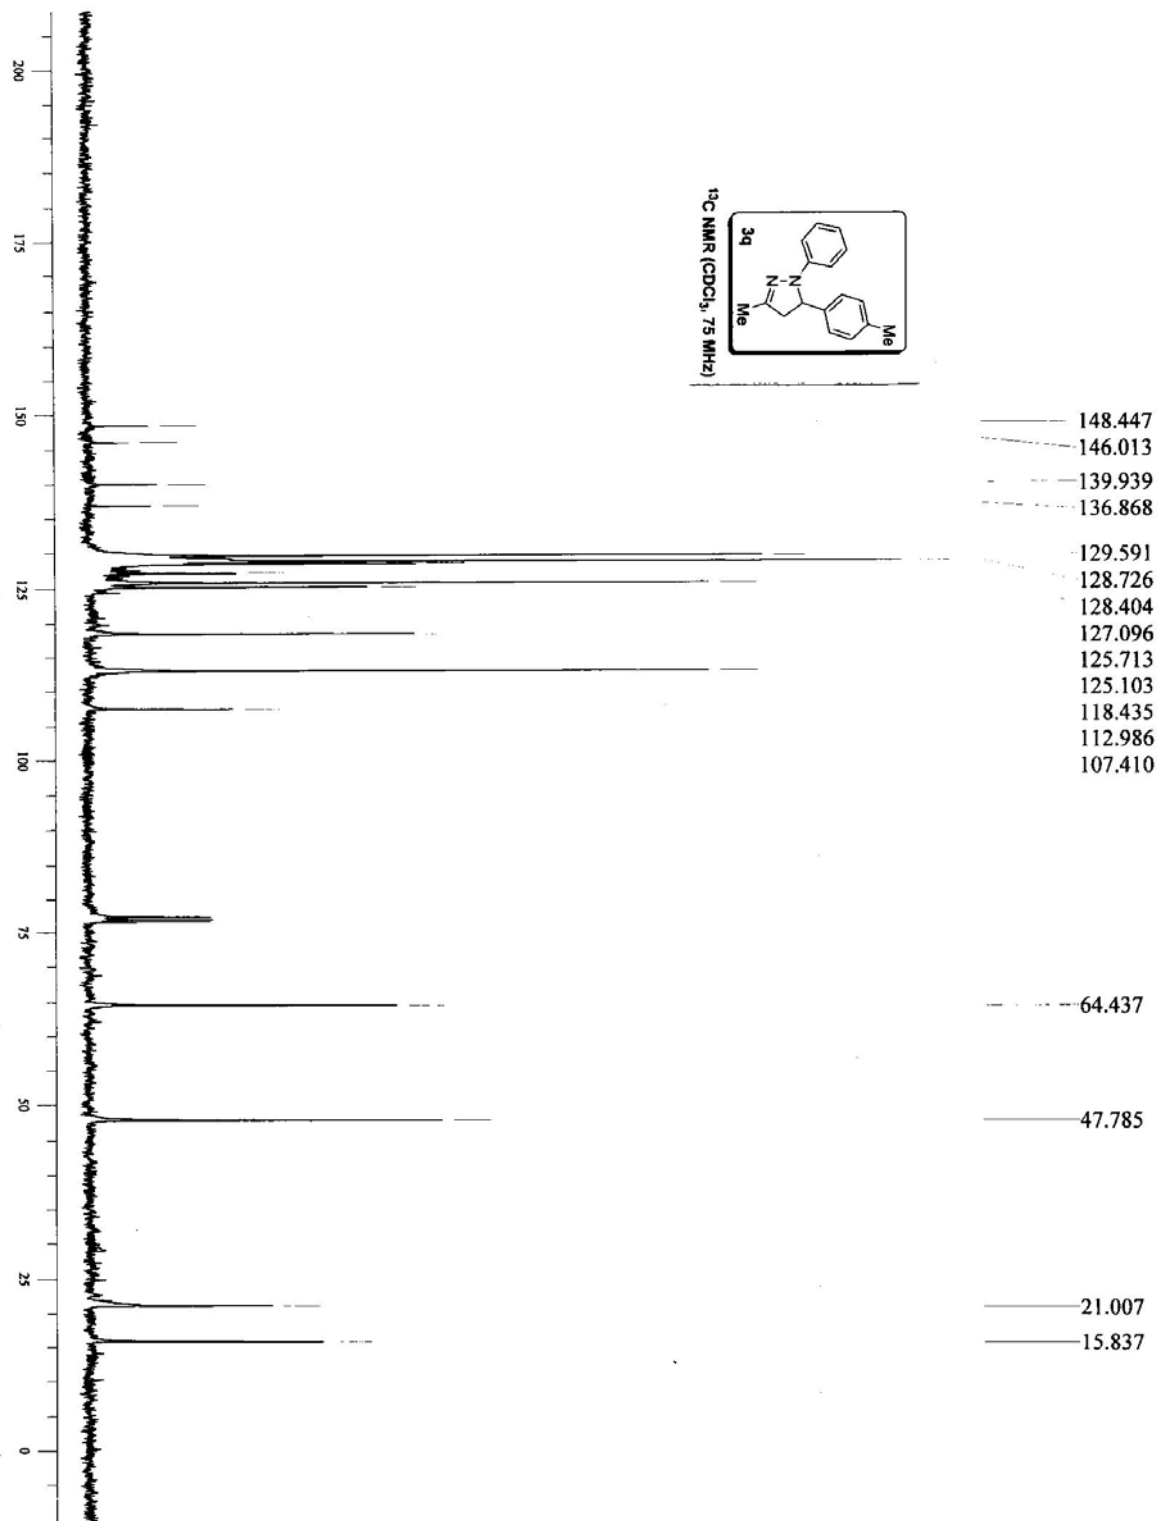

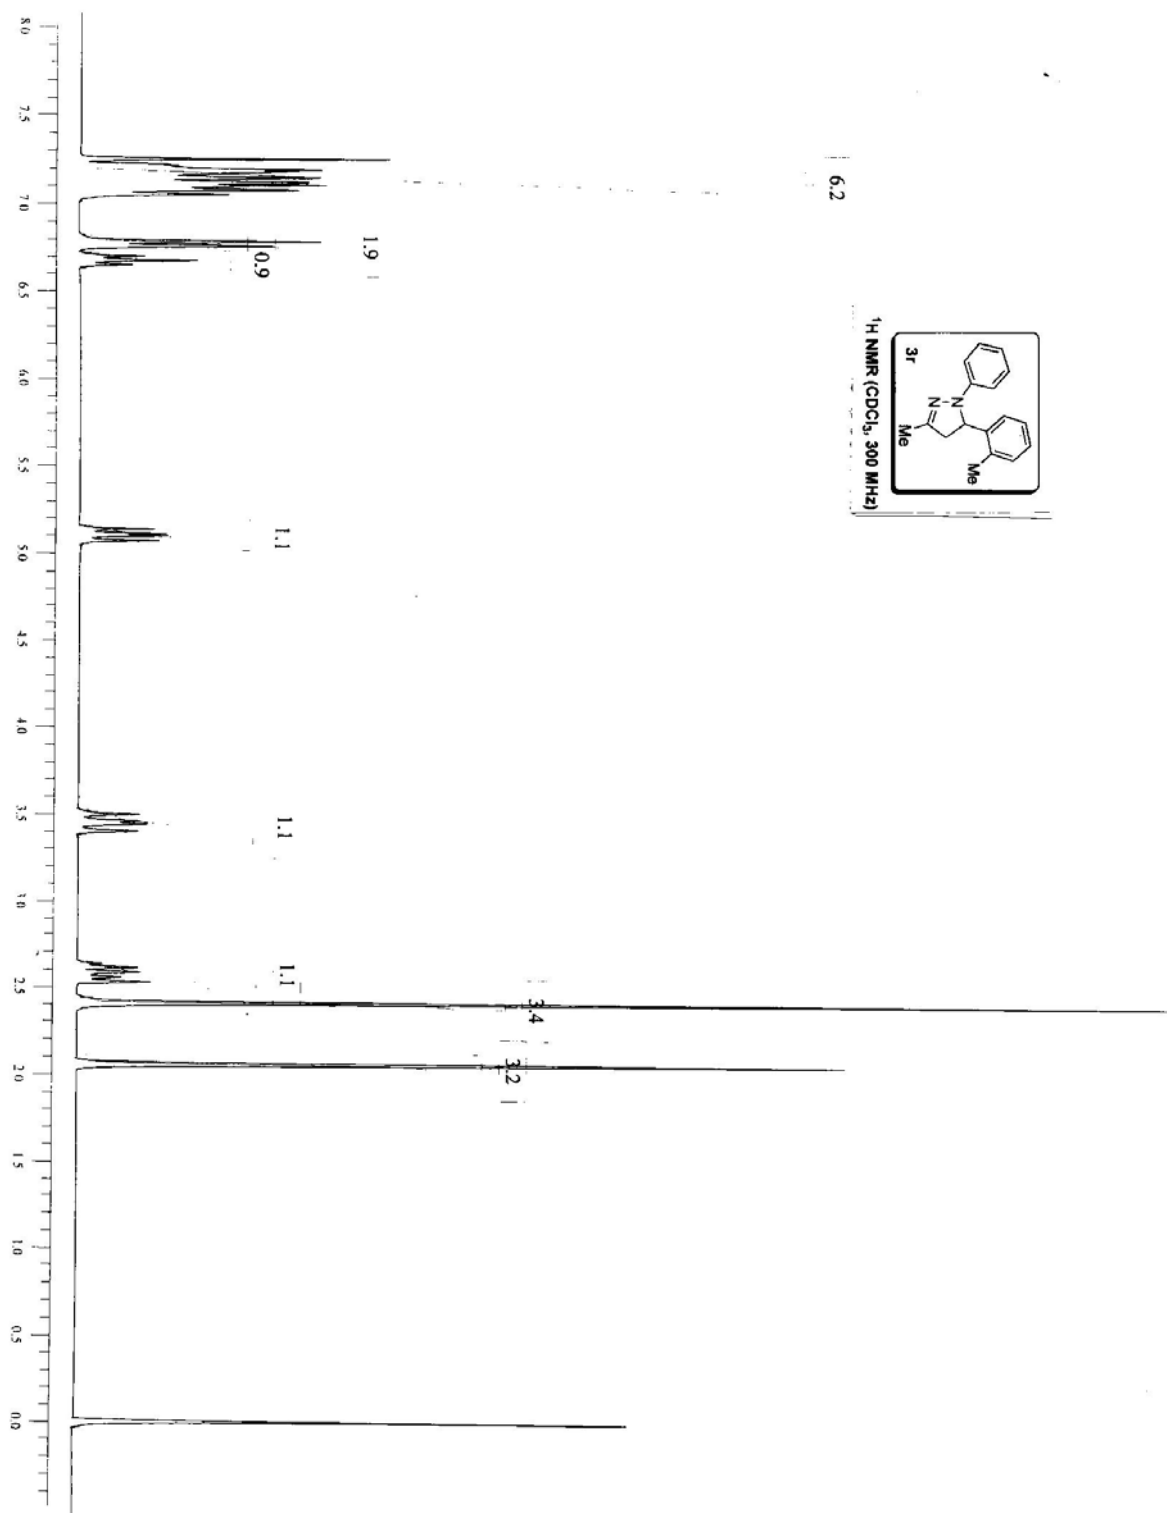

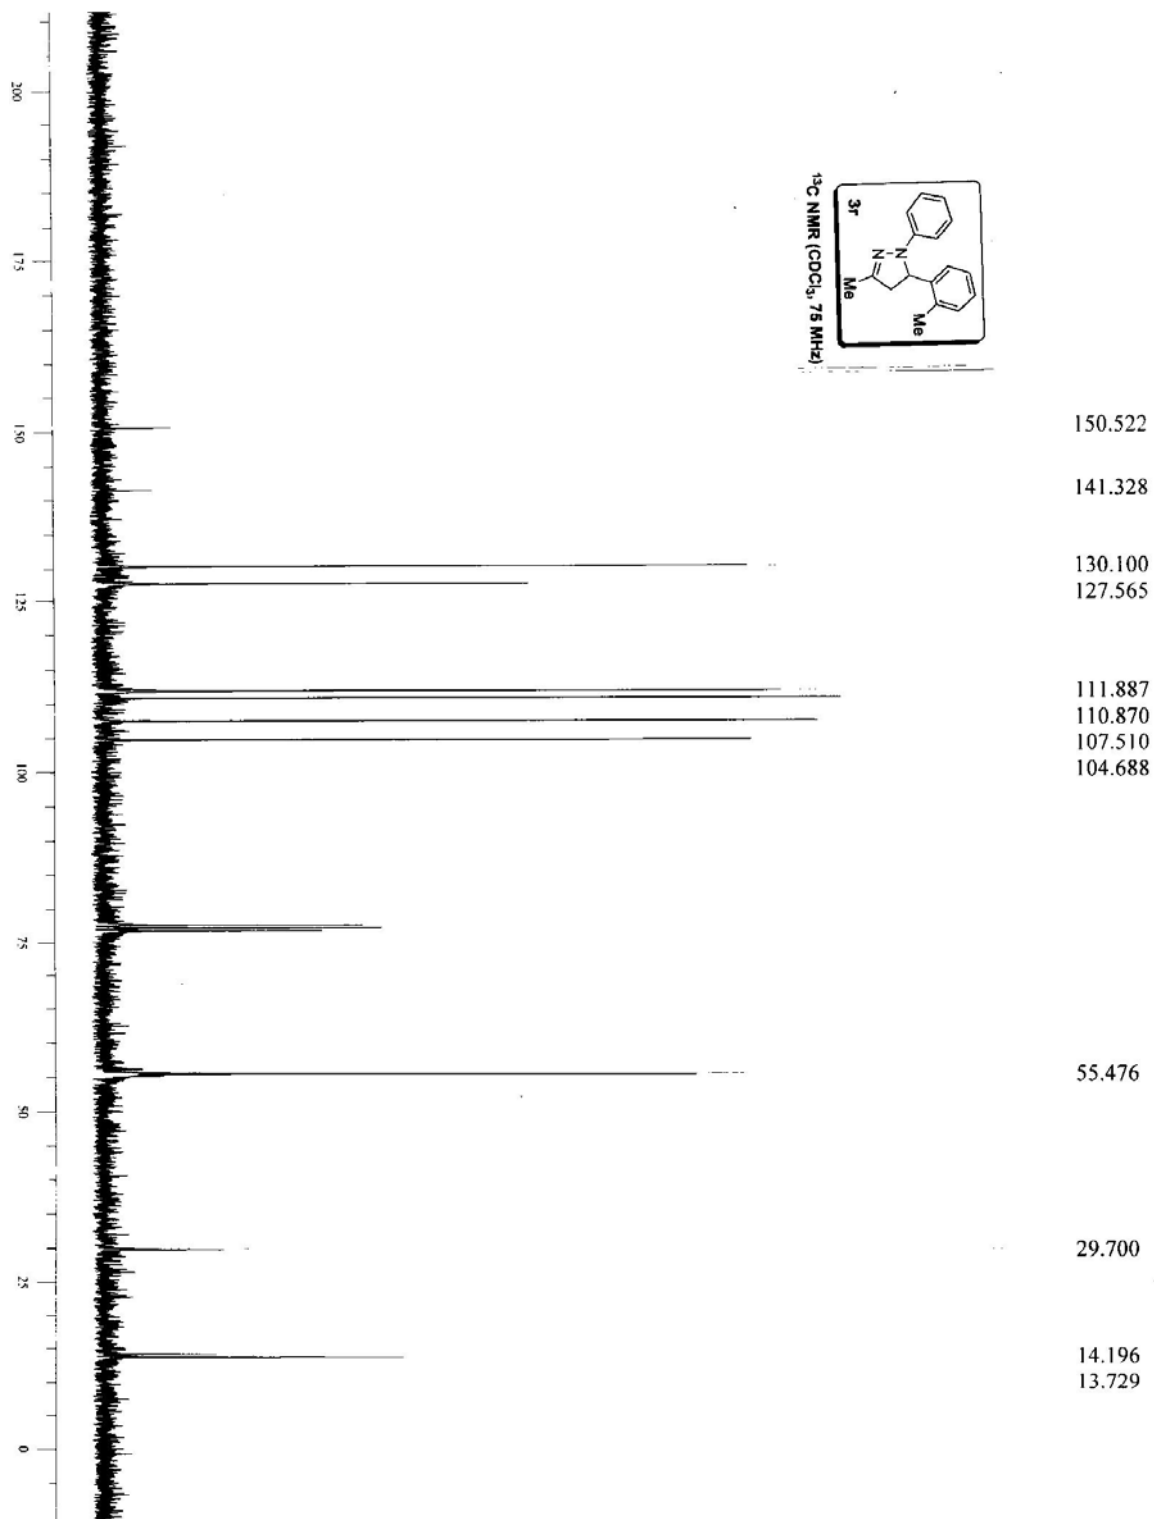

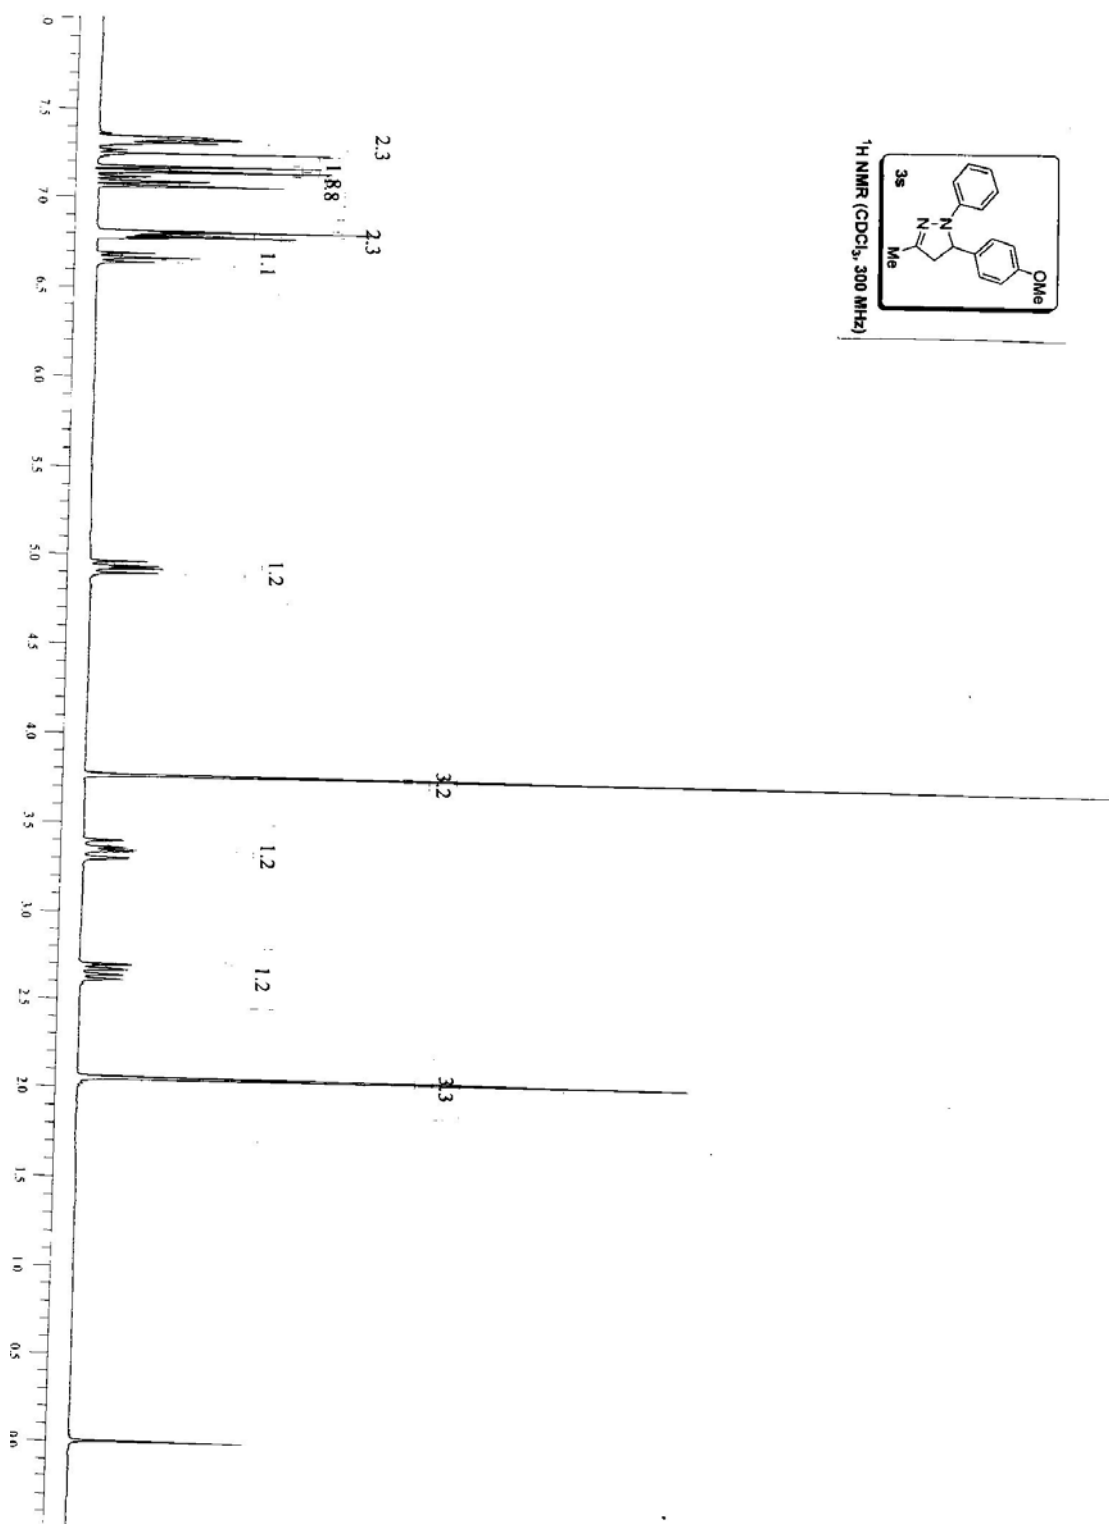

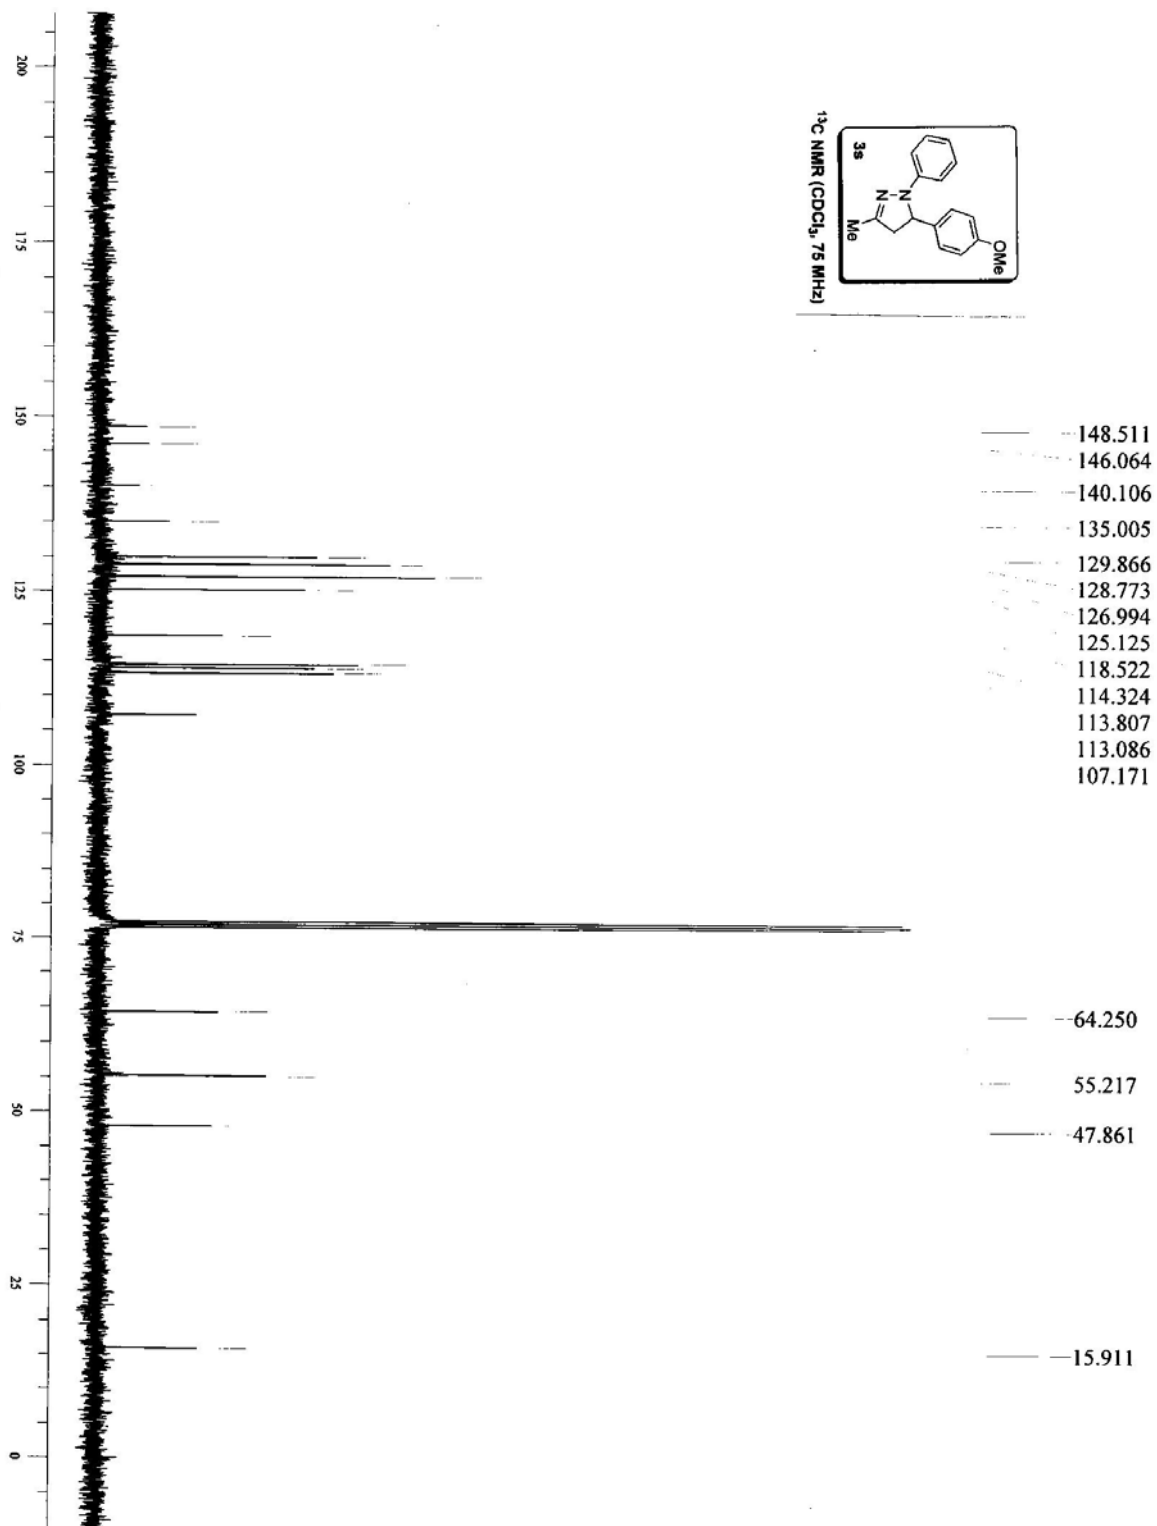

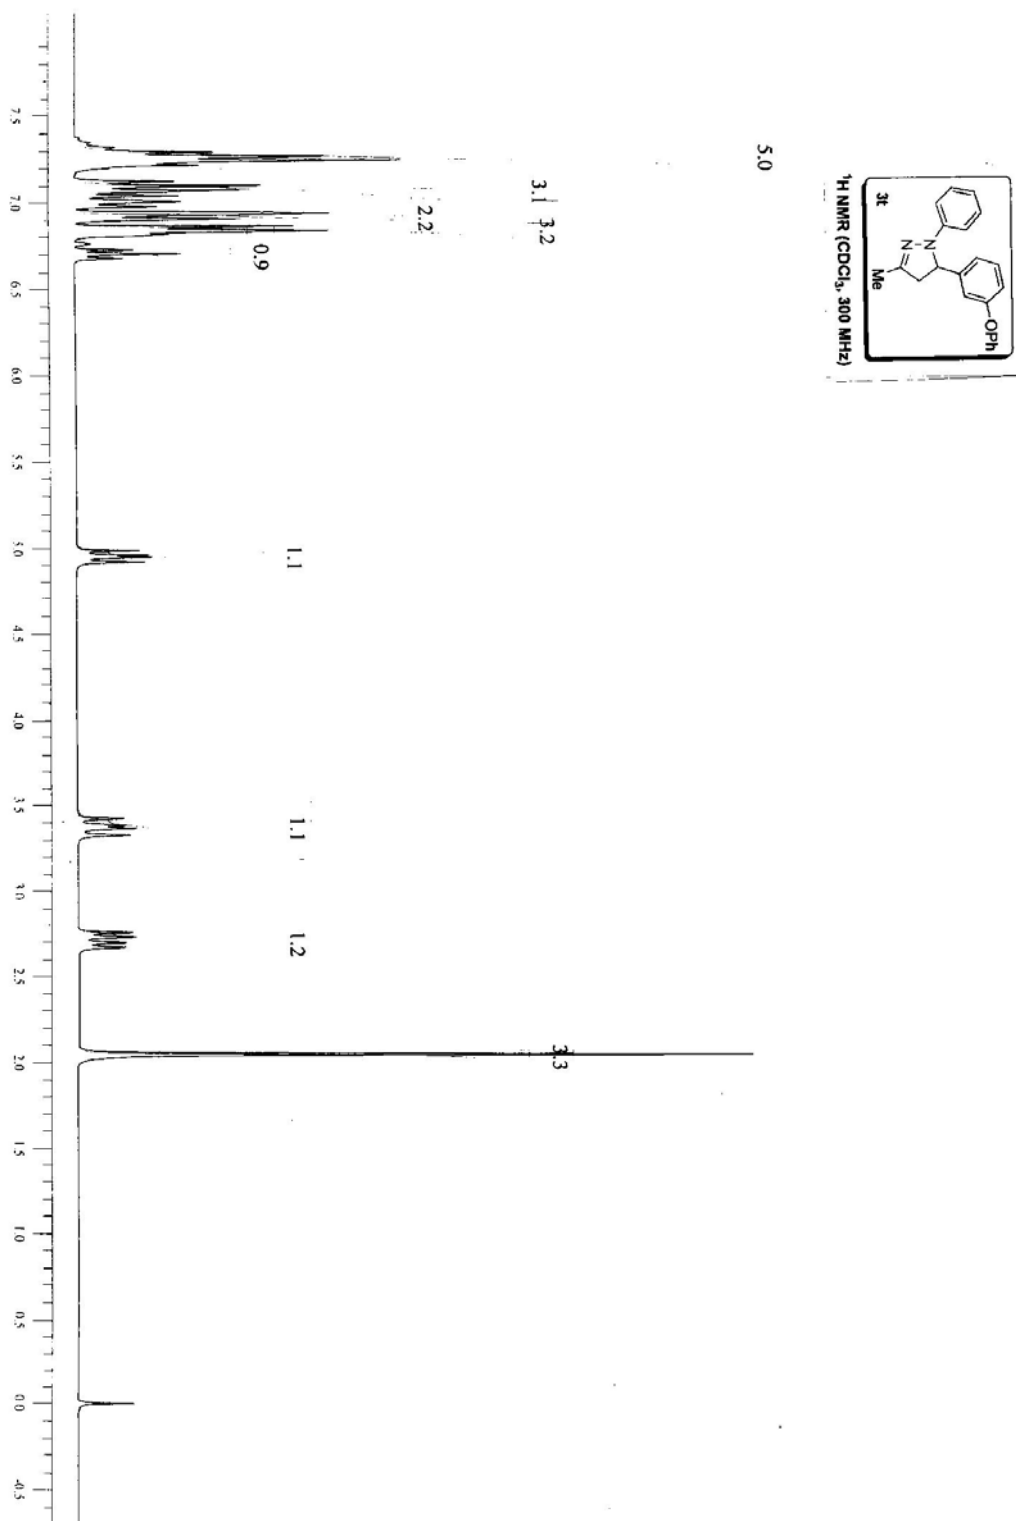

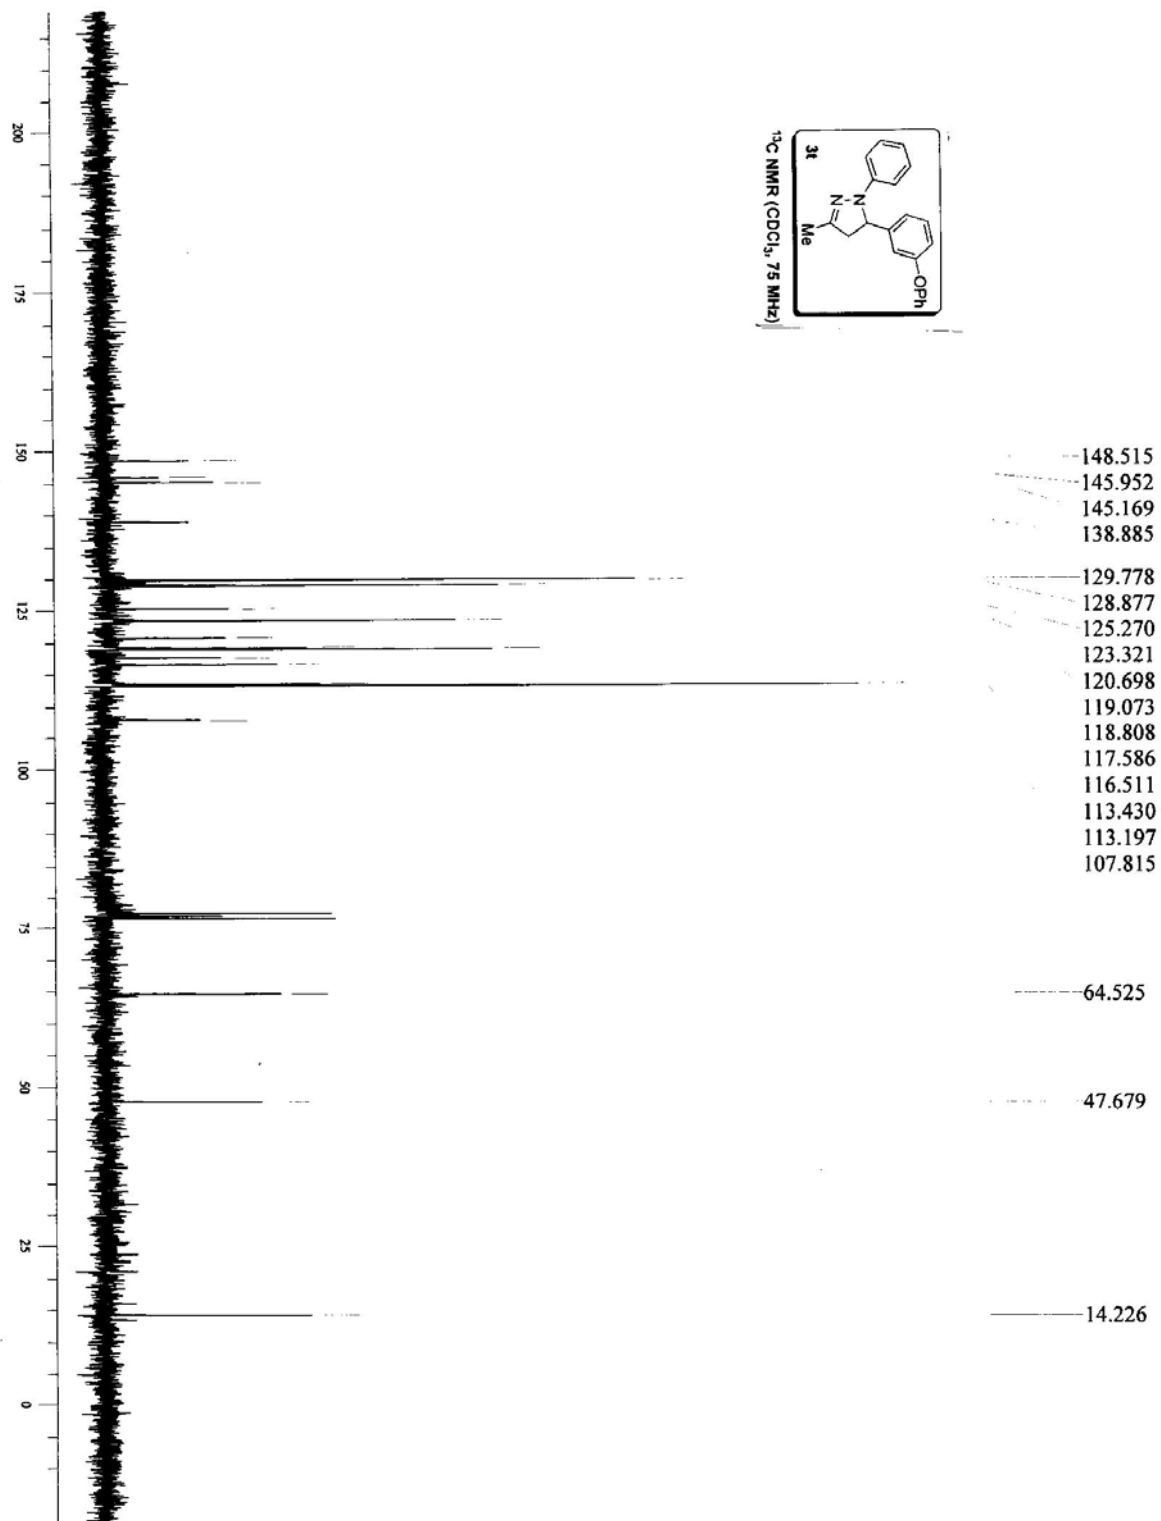



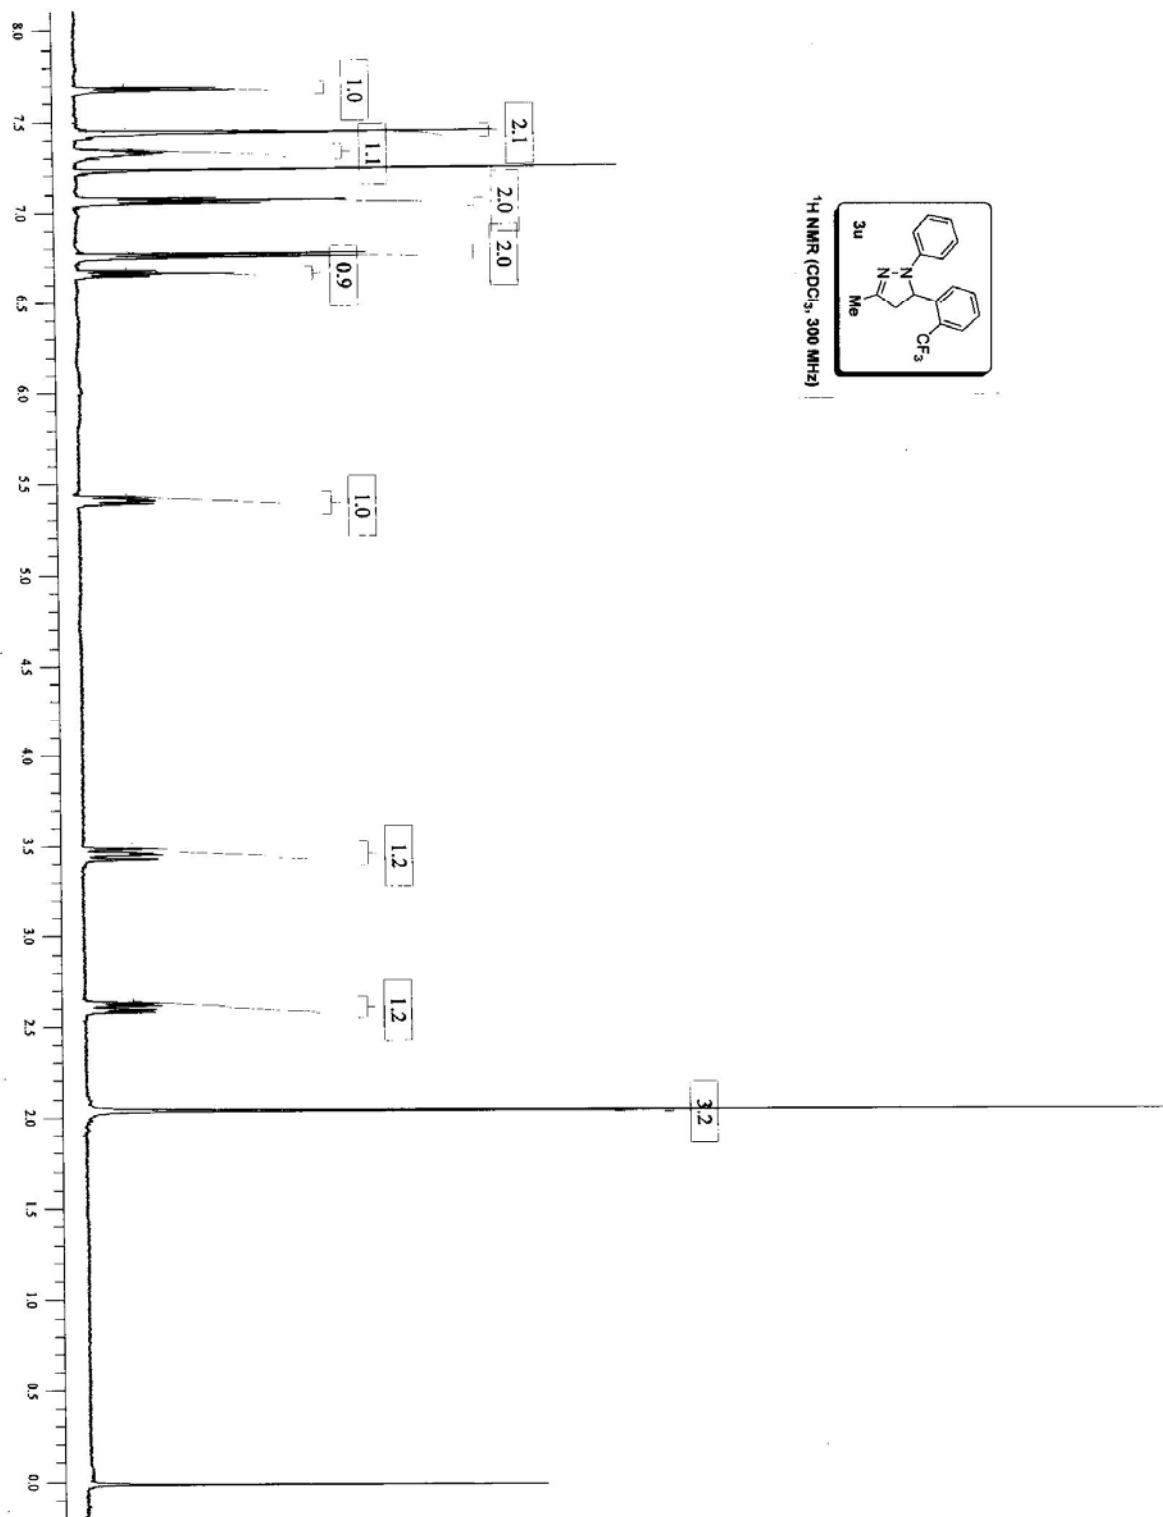

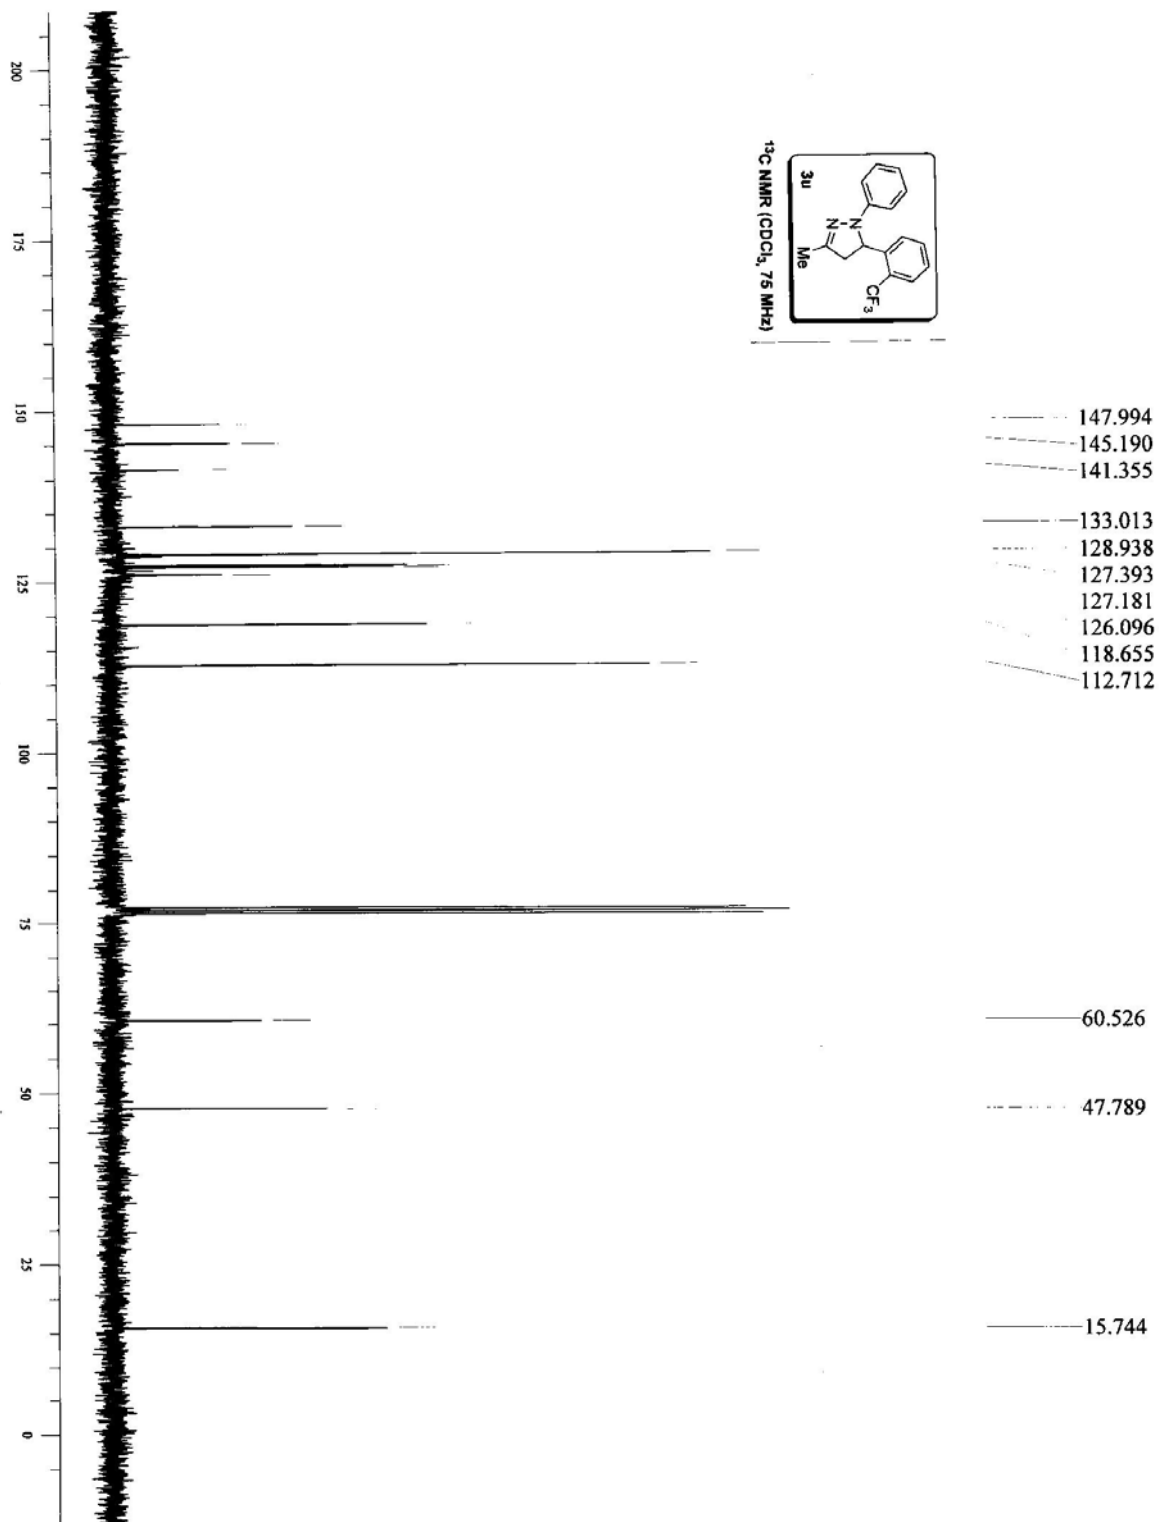

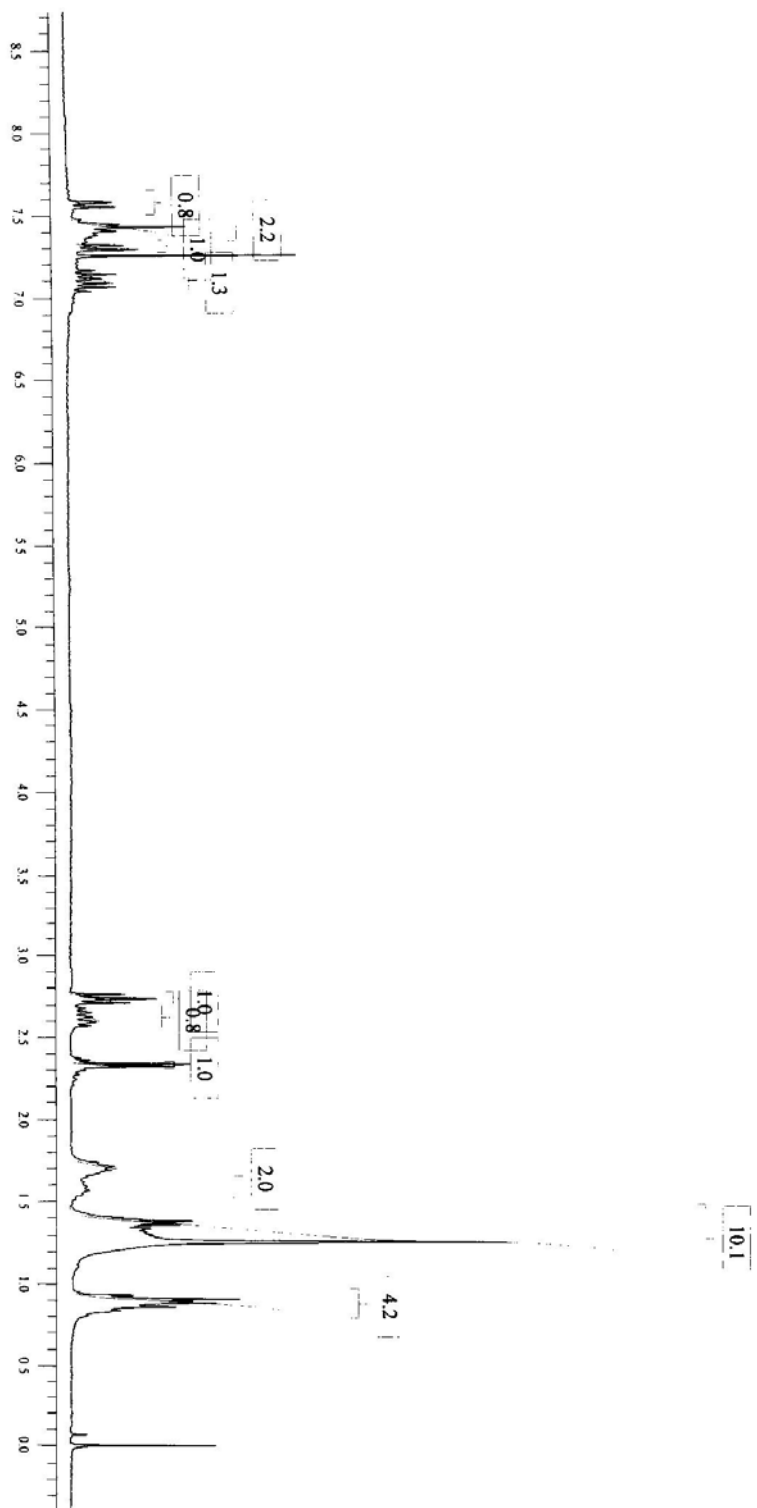

<sup>1</sup>H NMR (CDCl<sub>3</sub>, 300 MHz)

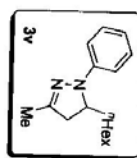

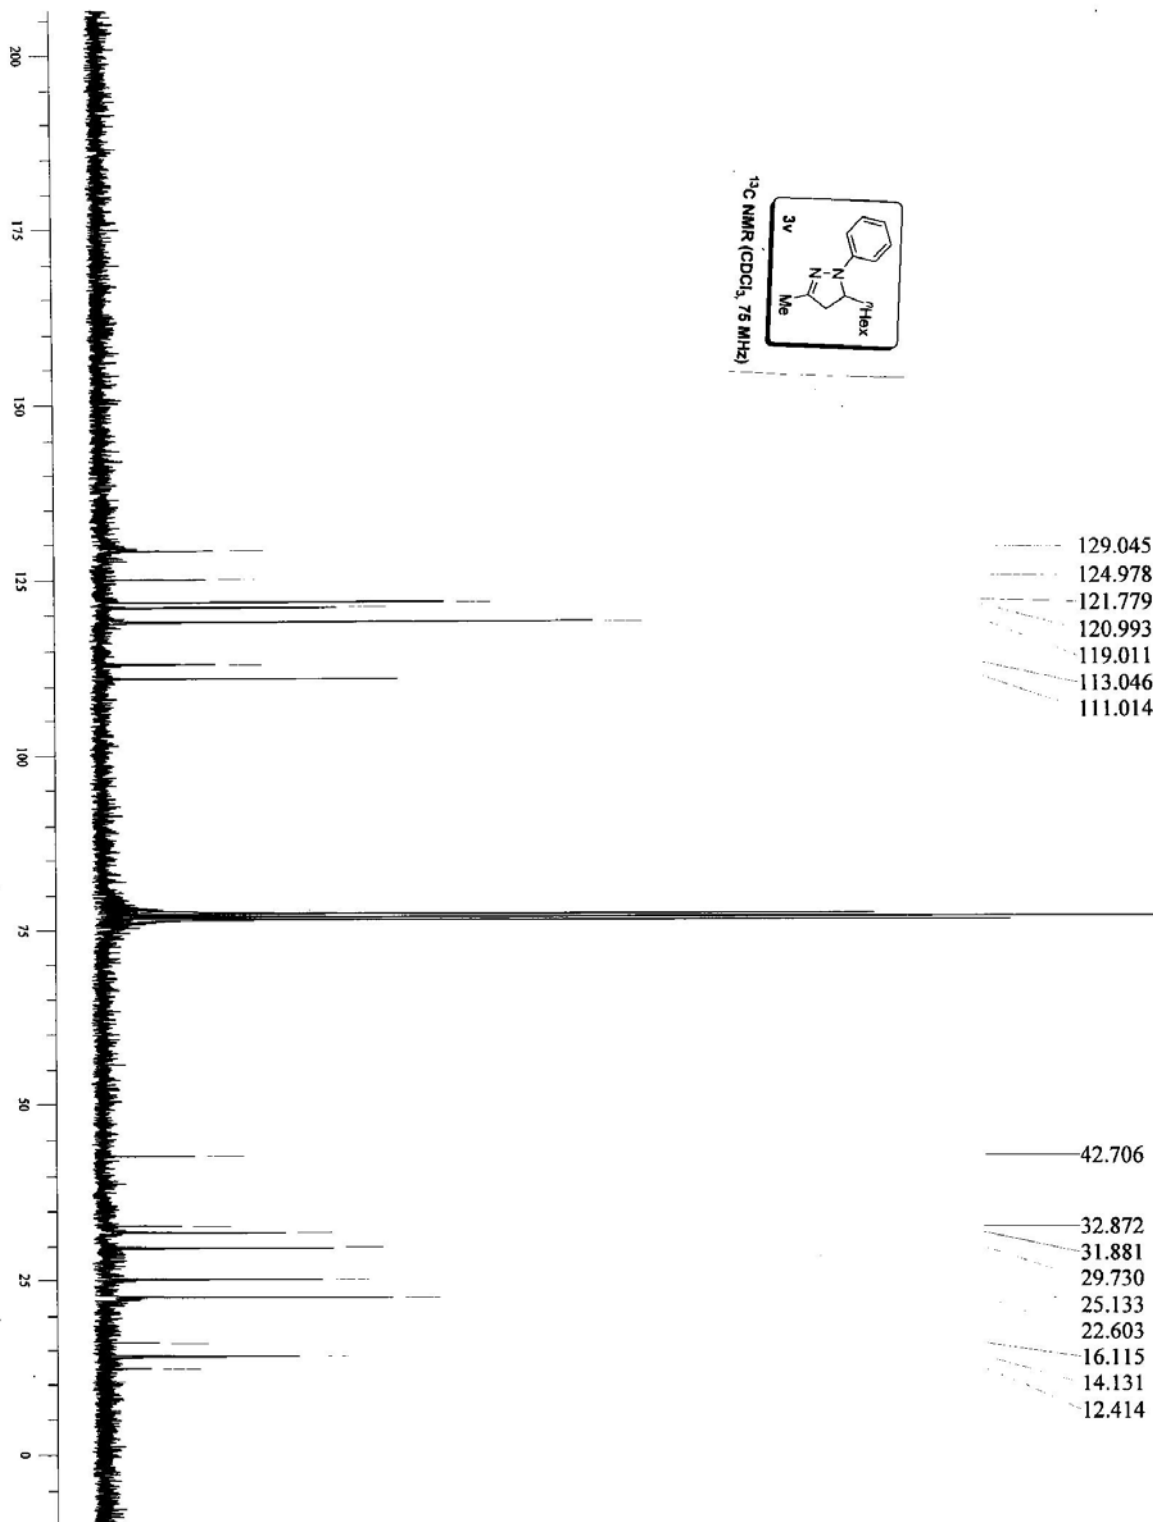

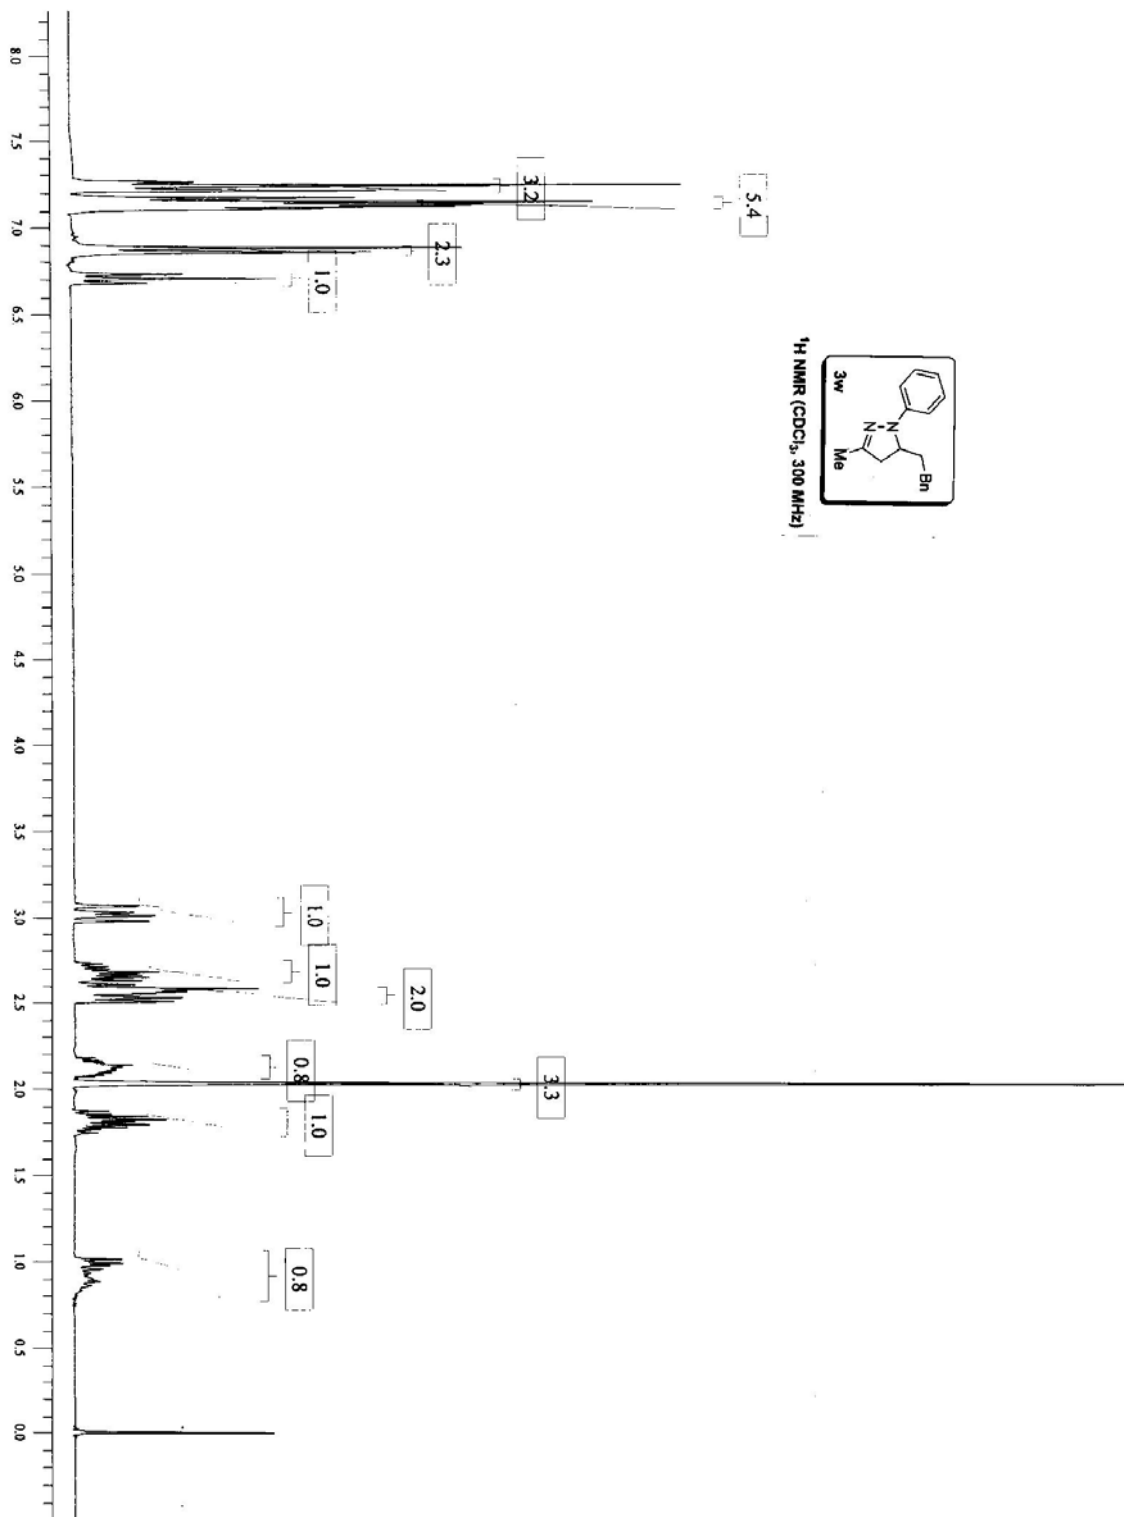

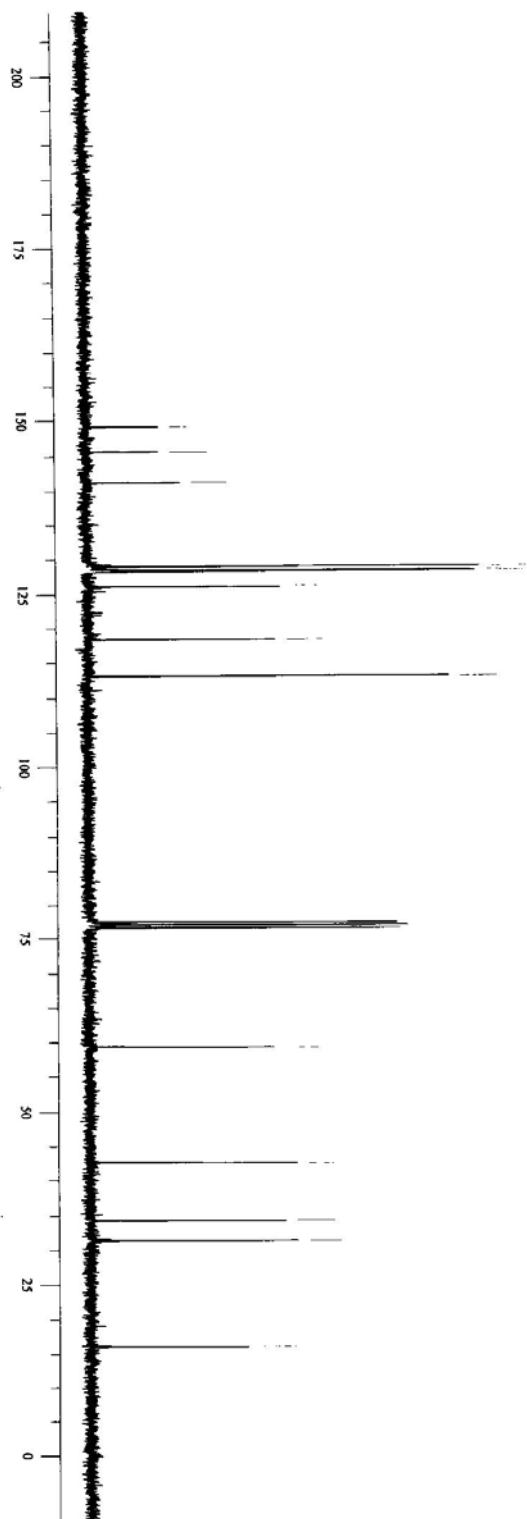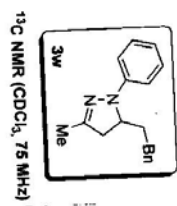

|   |         |
|---|---------|
| — | 149.110 |
| — | 145.546 |
| — | 141.098 |
| — | 128.982 |
| — | 128.420 |
| — | 128.292 |
| — | 126.031 |
| — | 118.382 |
| — | 113.084 |
| — | 59.365  |
| — | 42.585  |
| — | 34.260  |
| — | 31.359  |
| — | 16.027  |

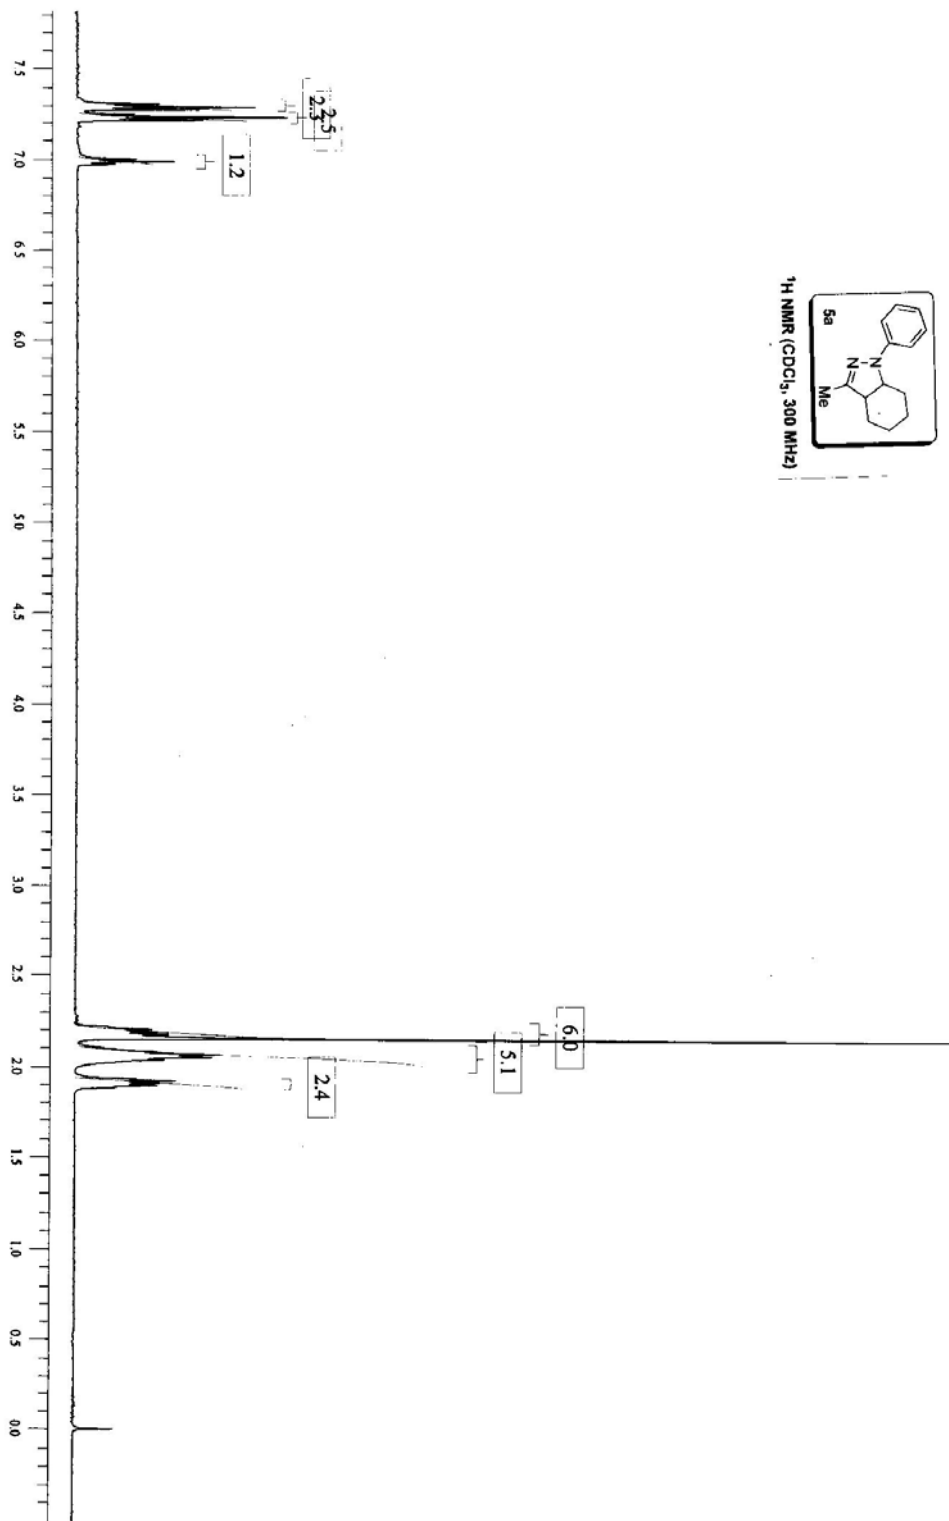

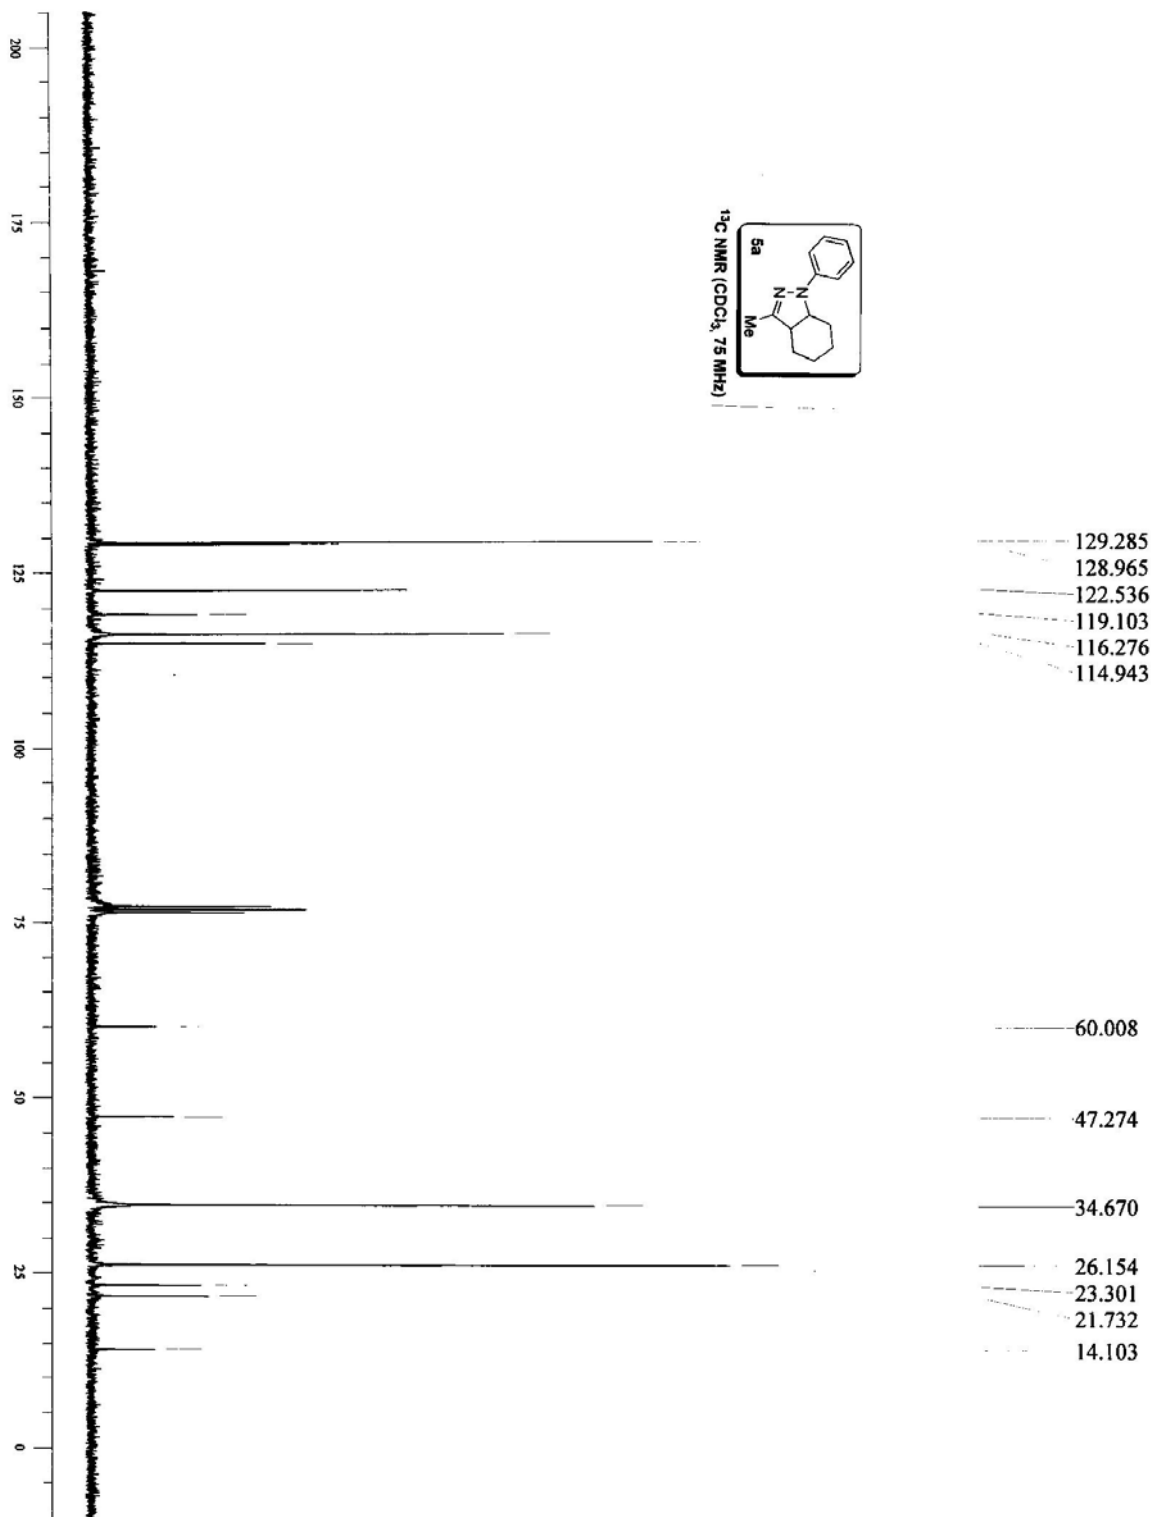



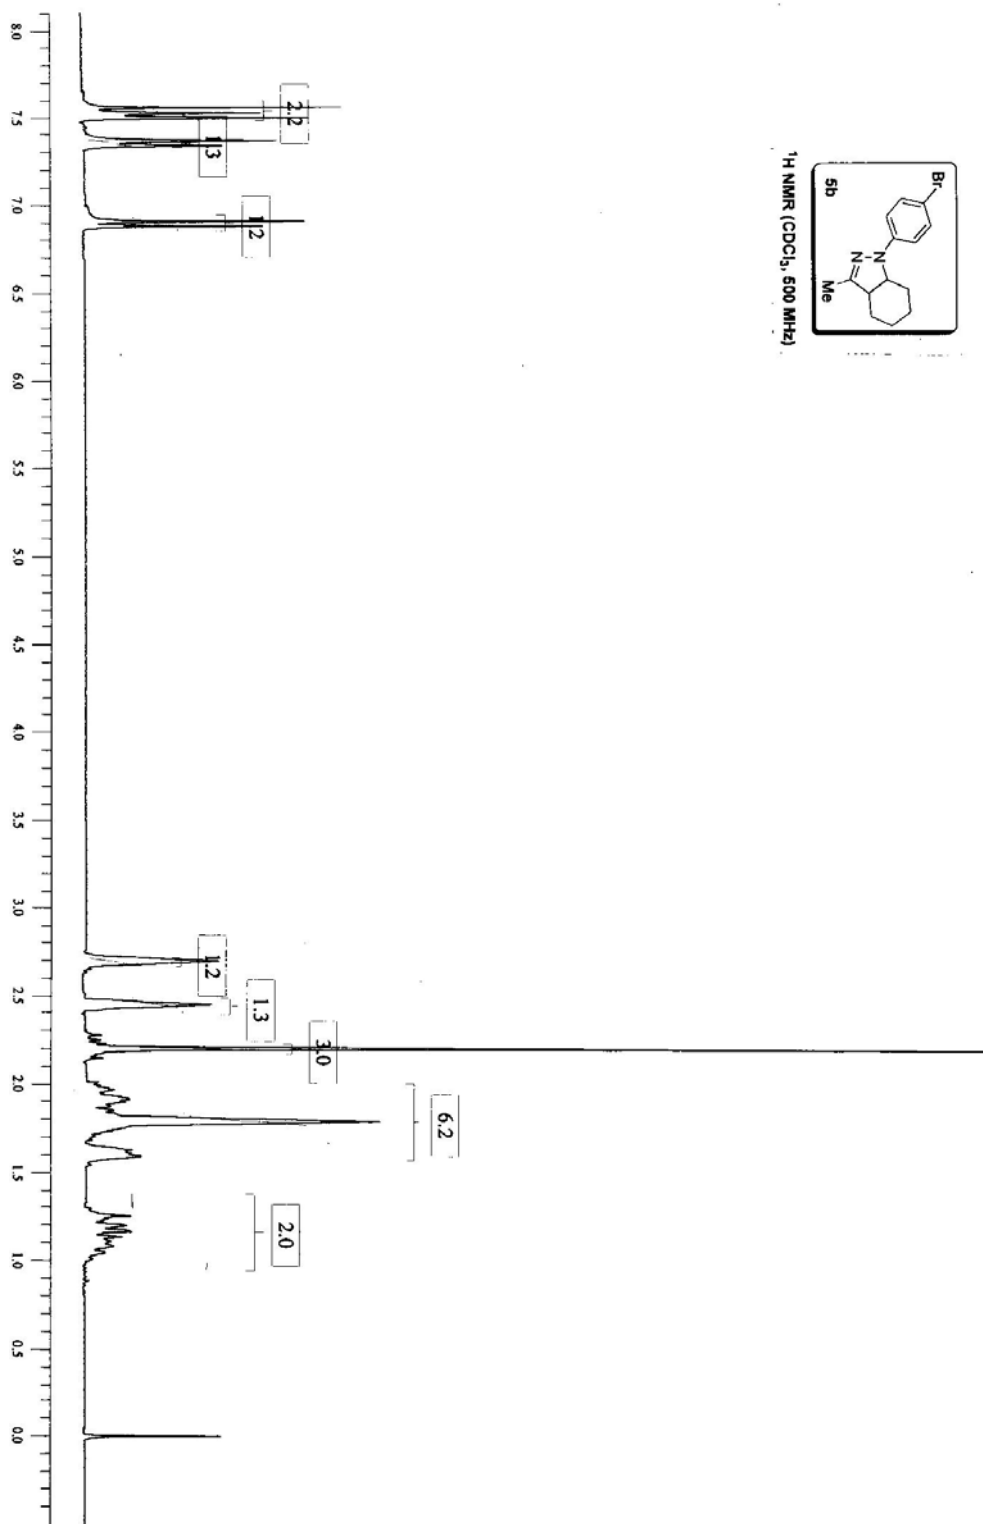

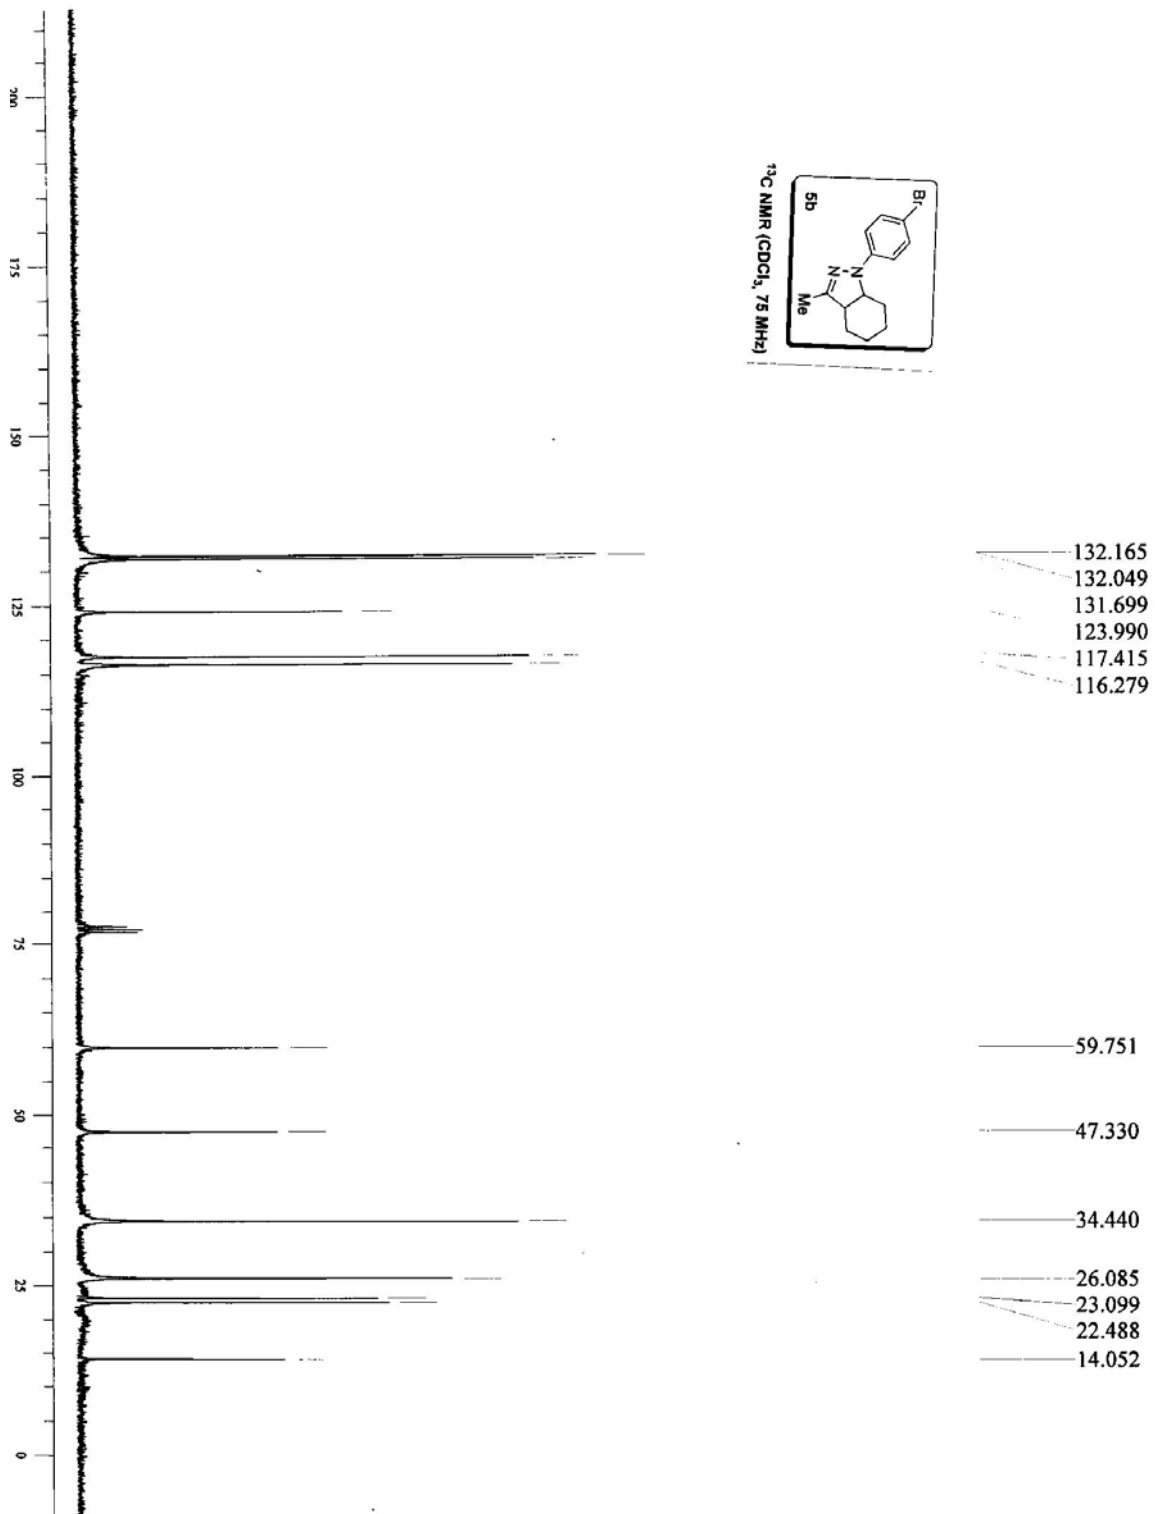

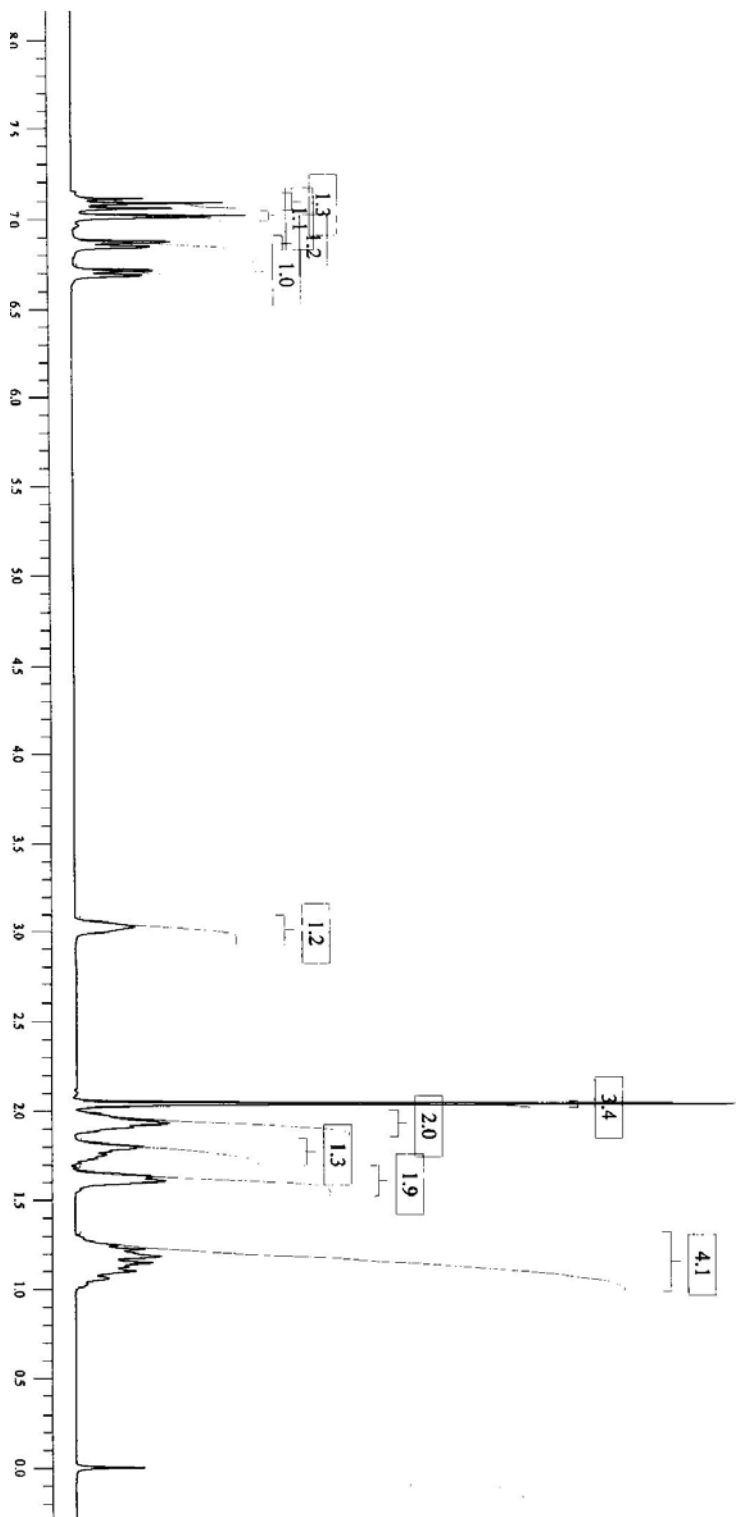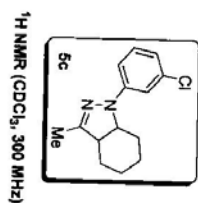

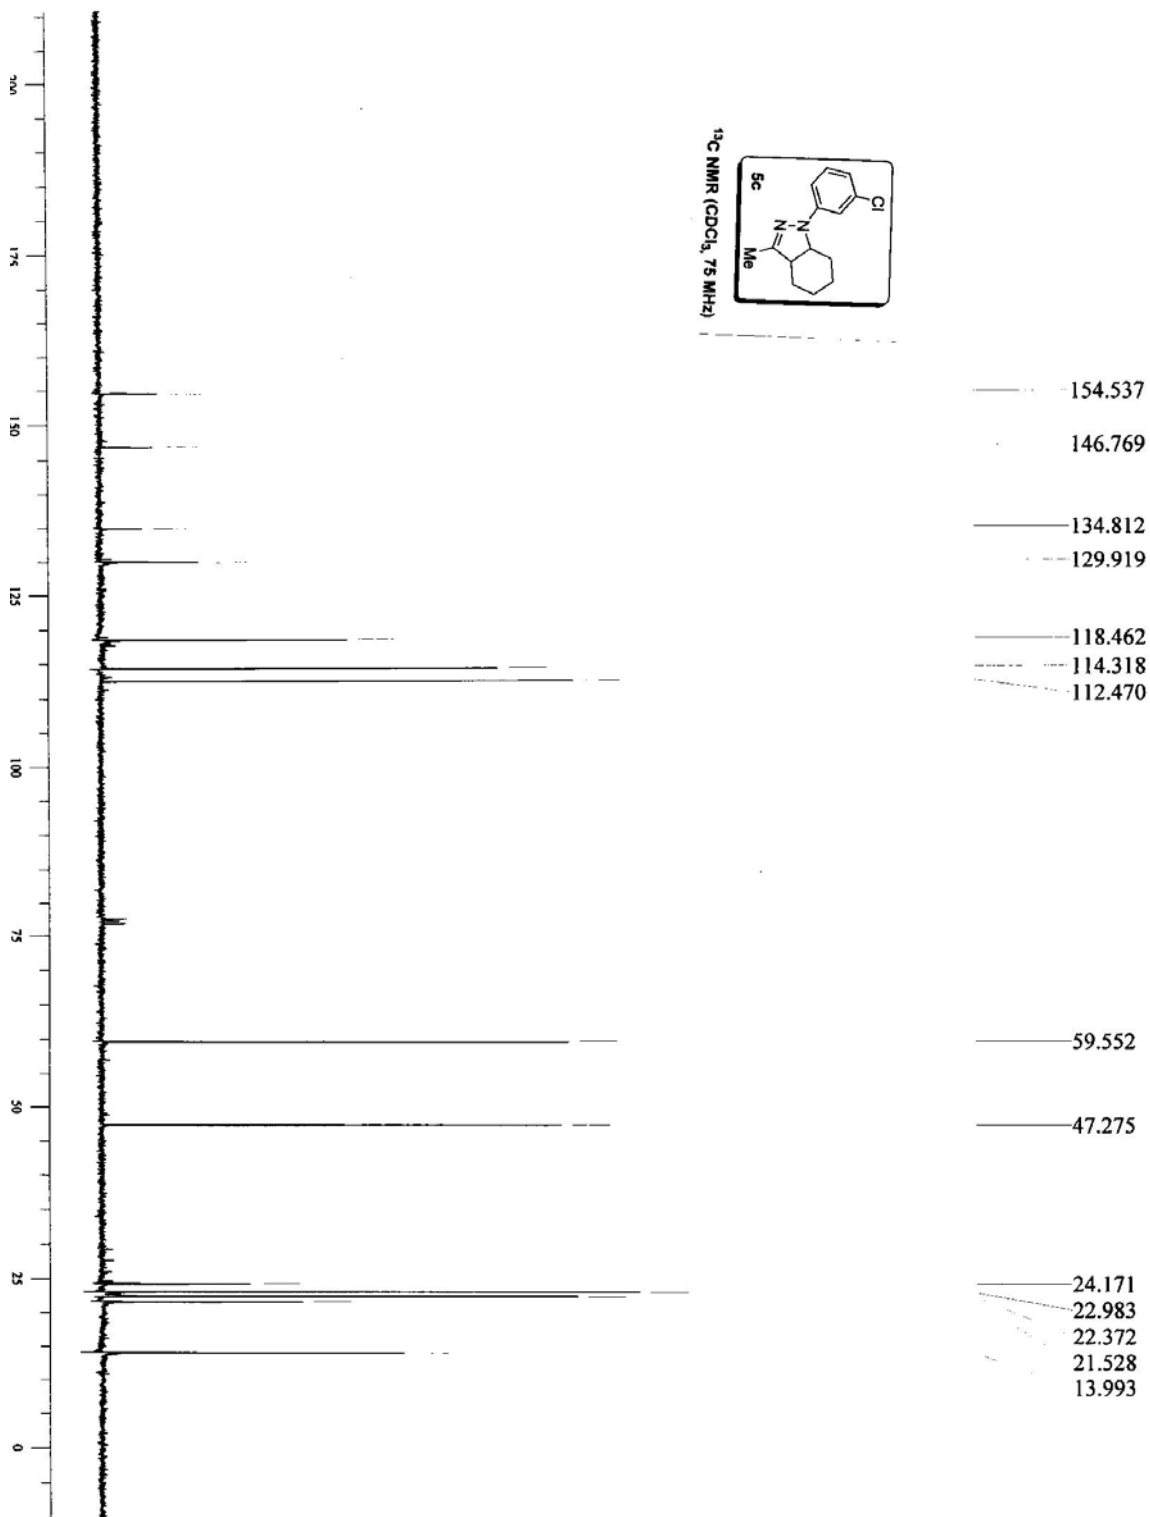

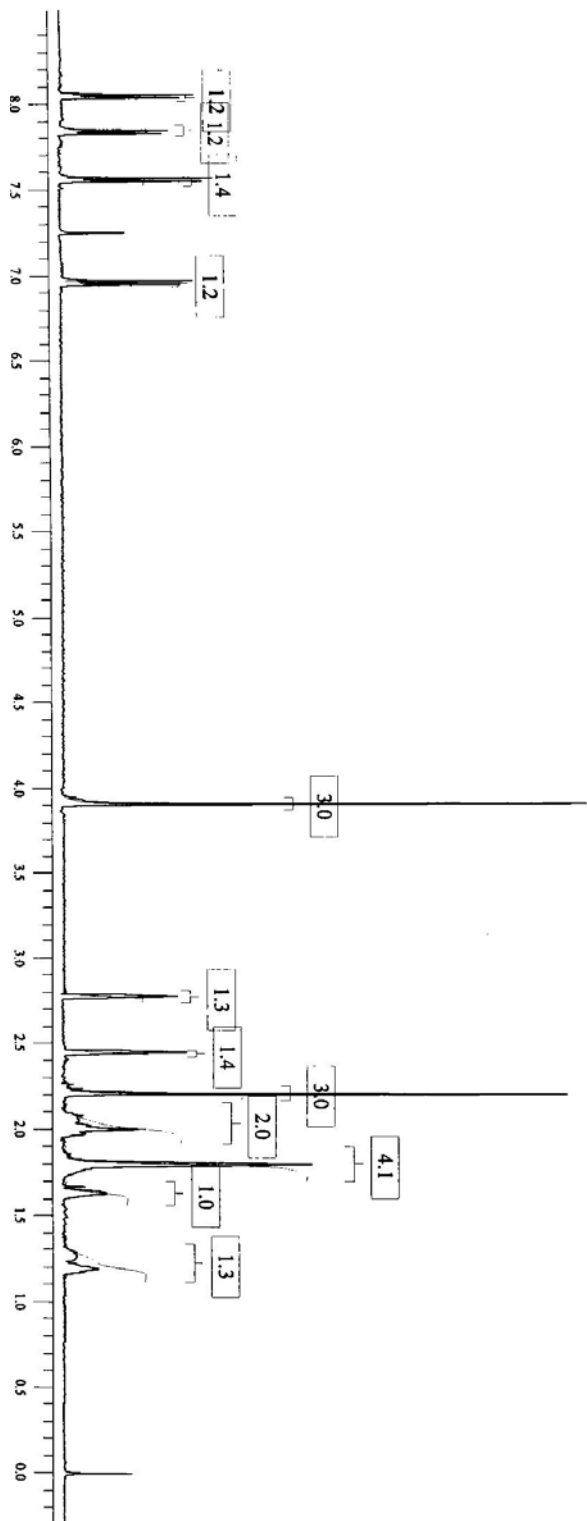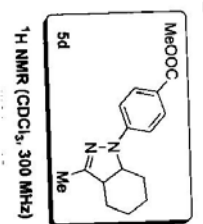

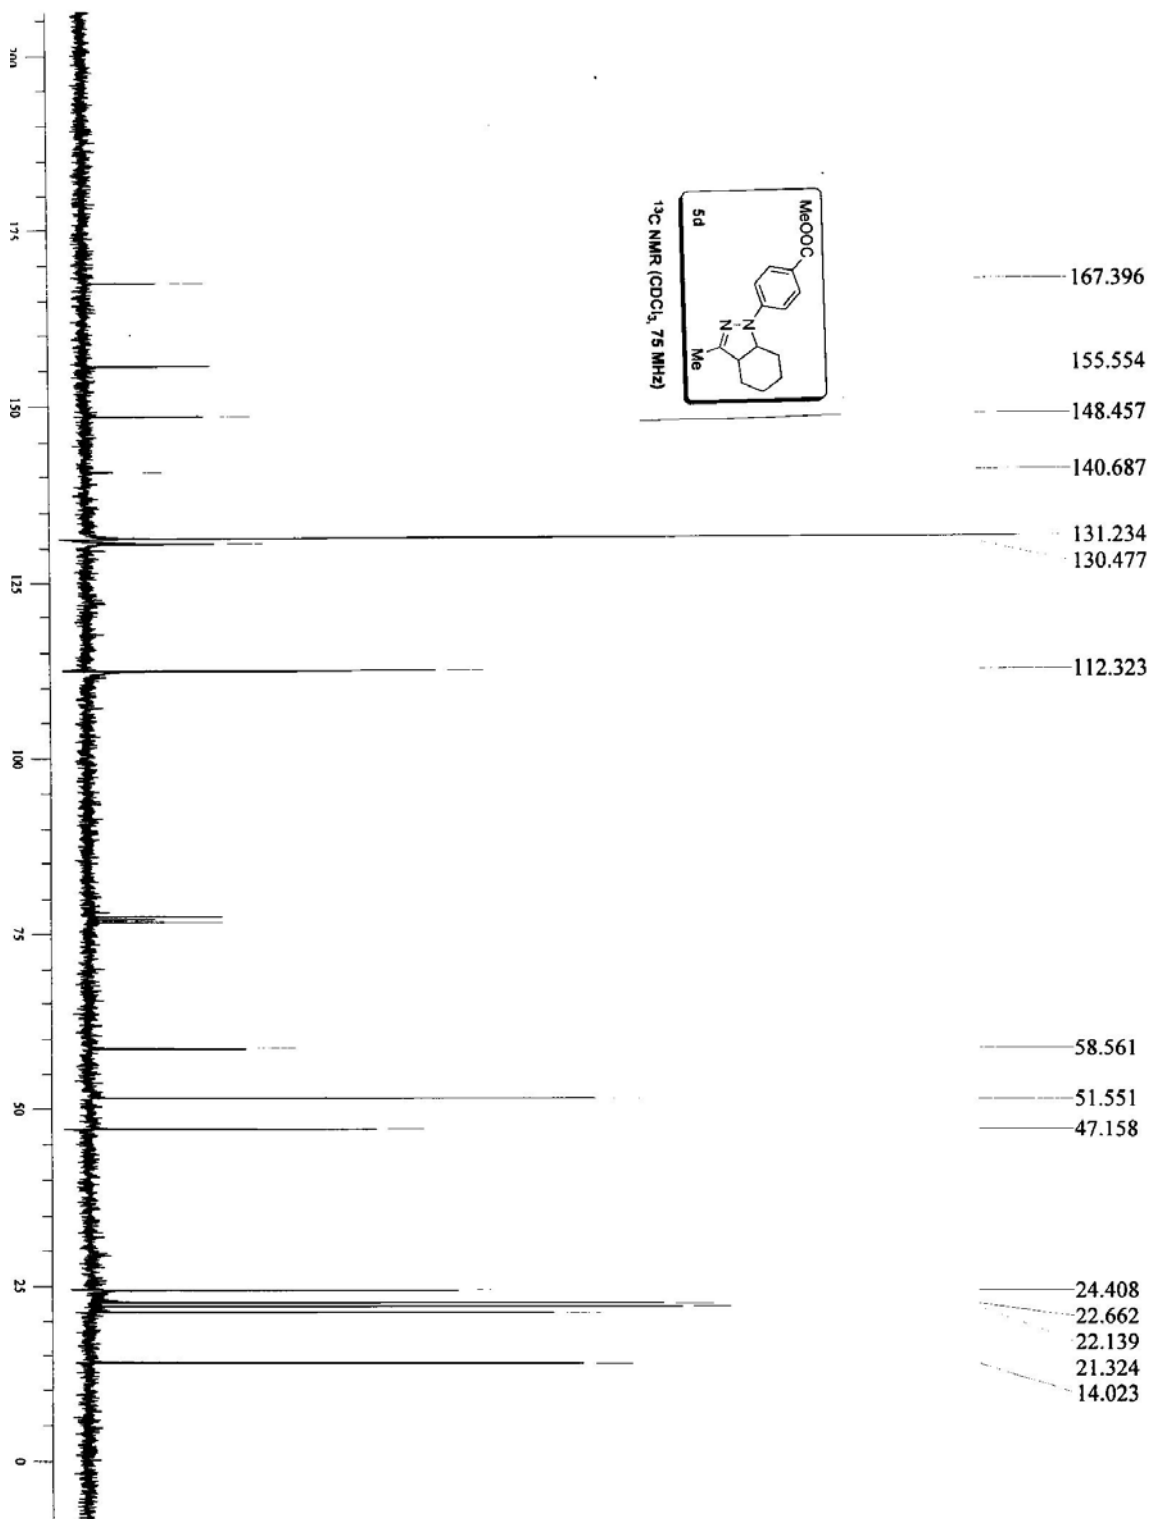

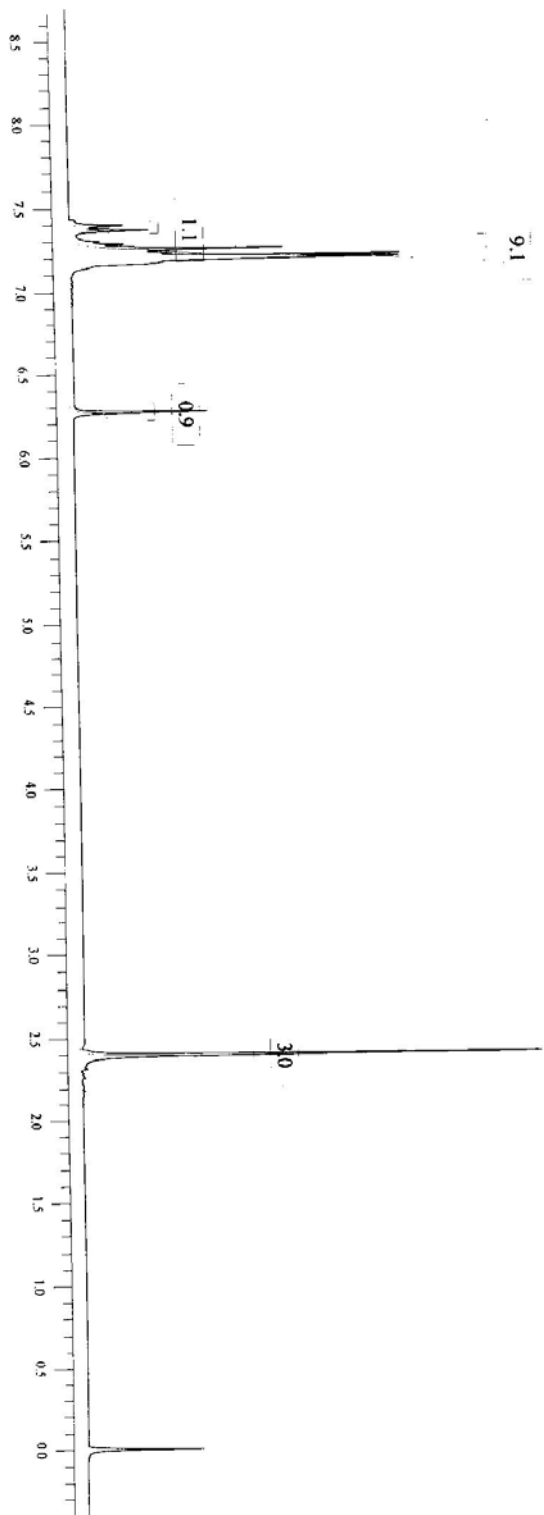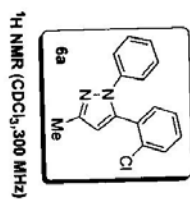

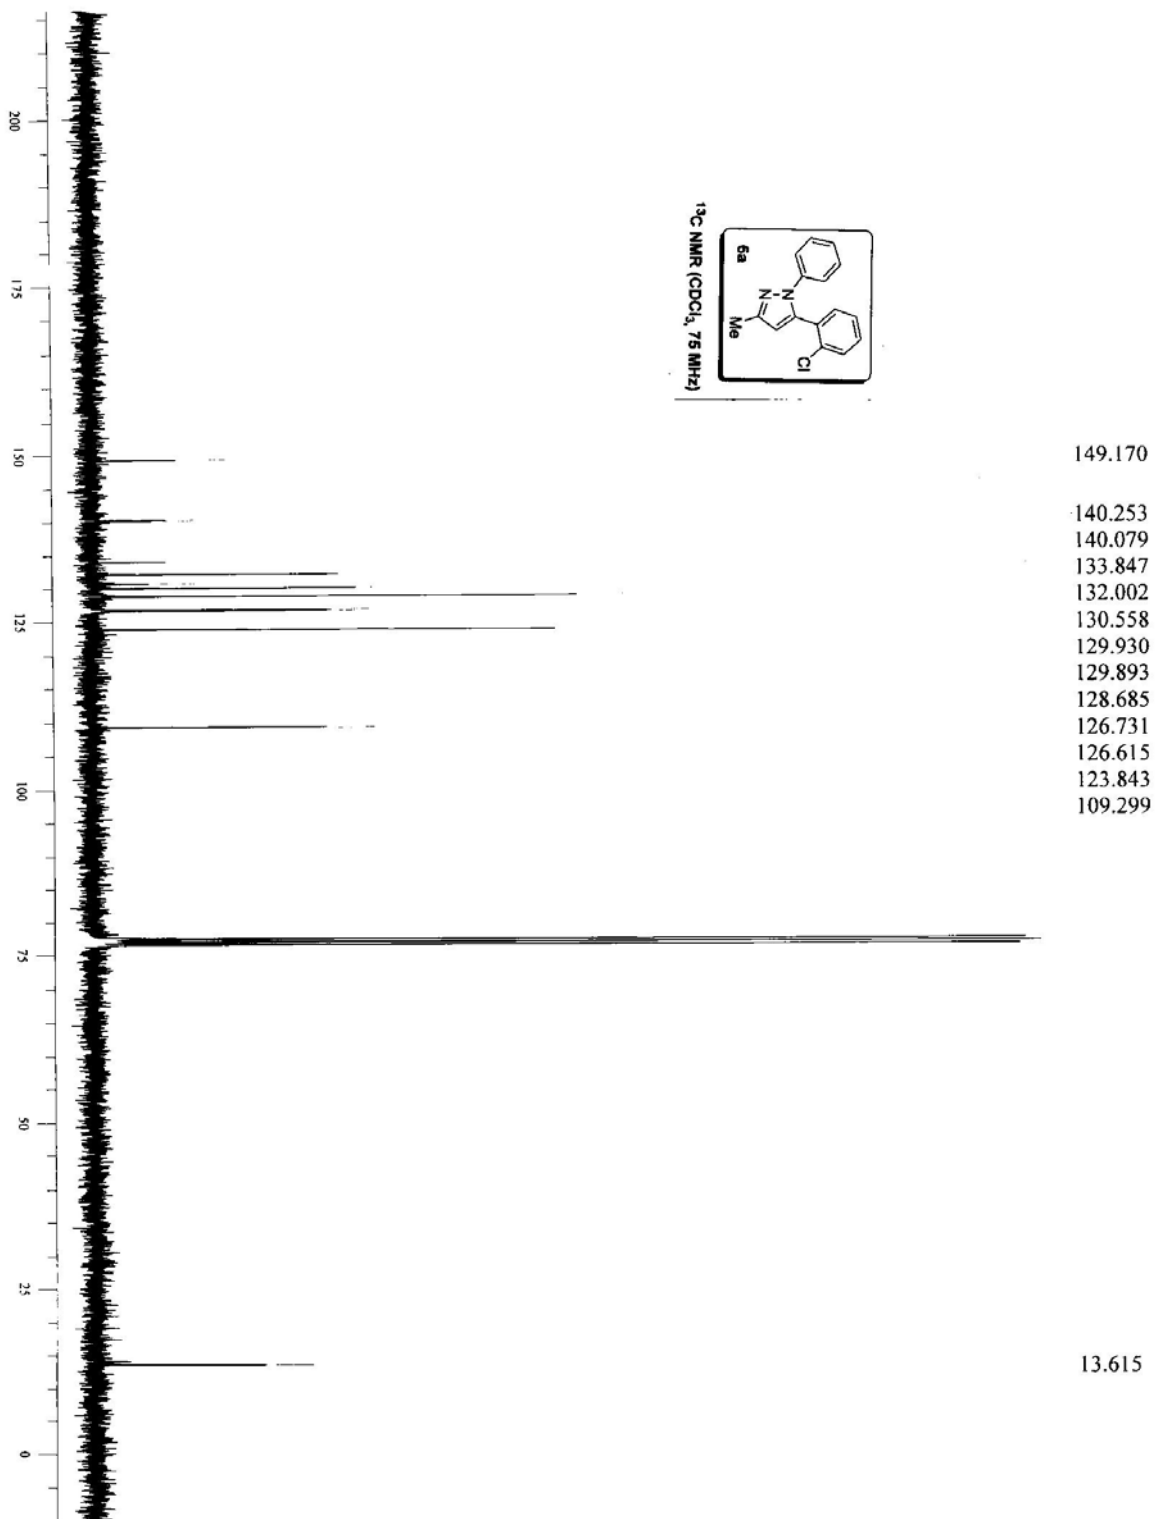



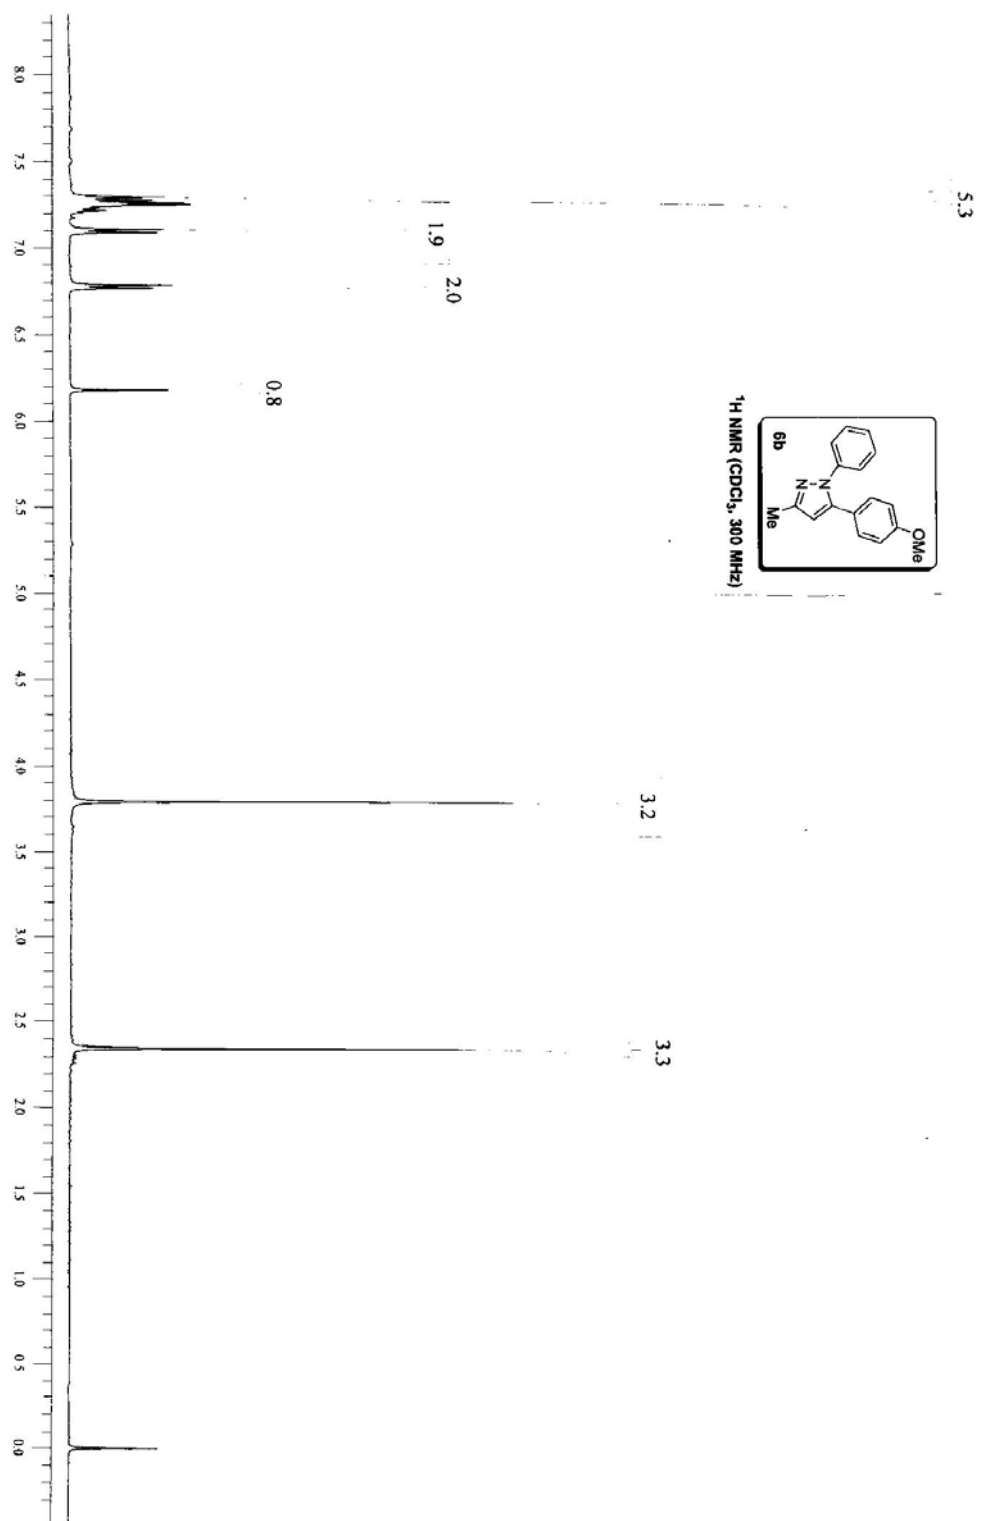

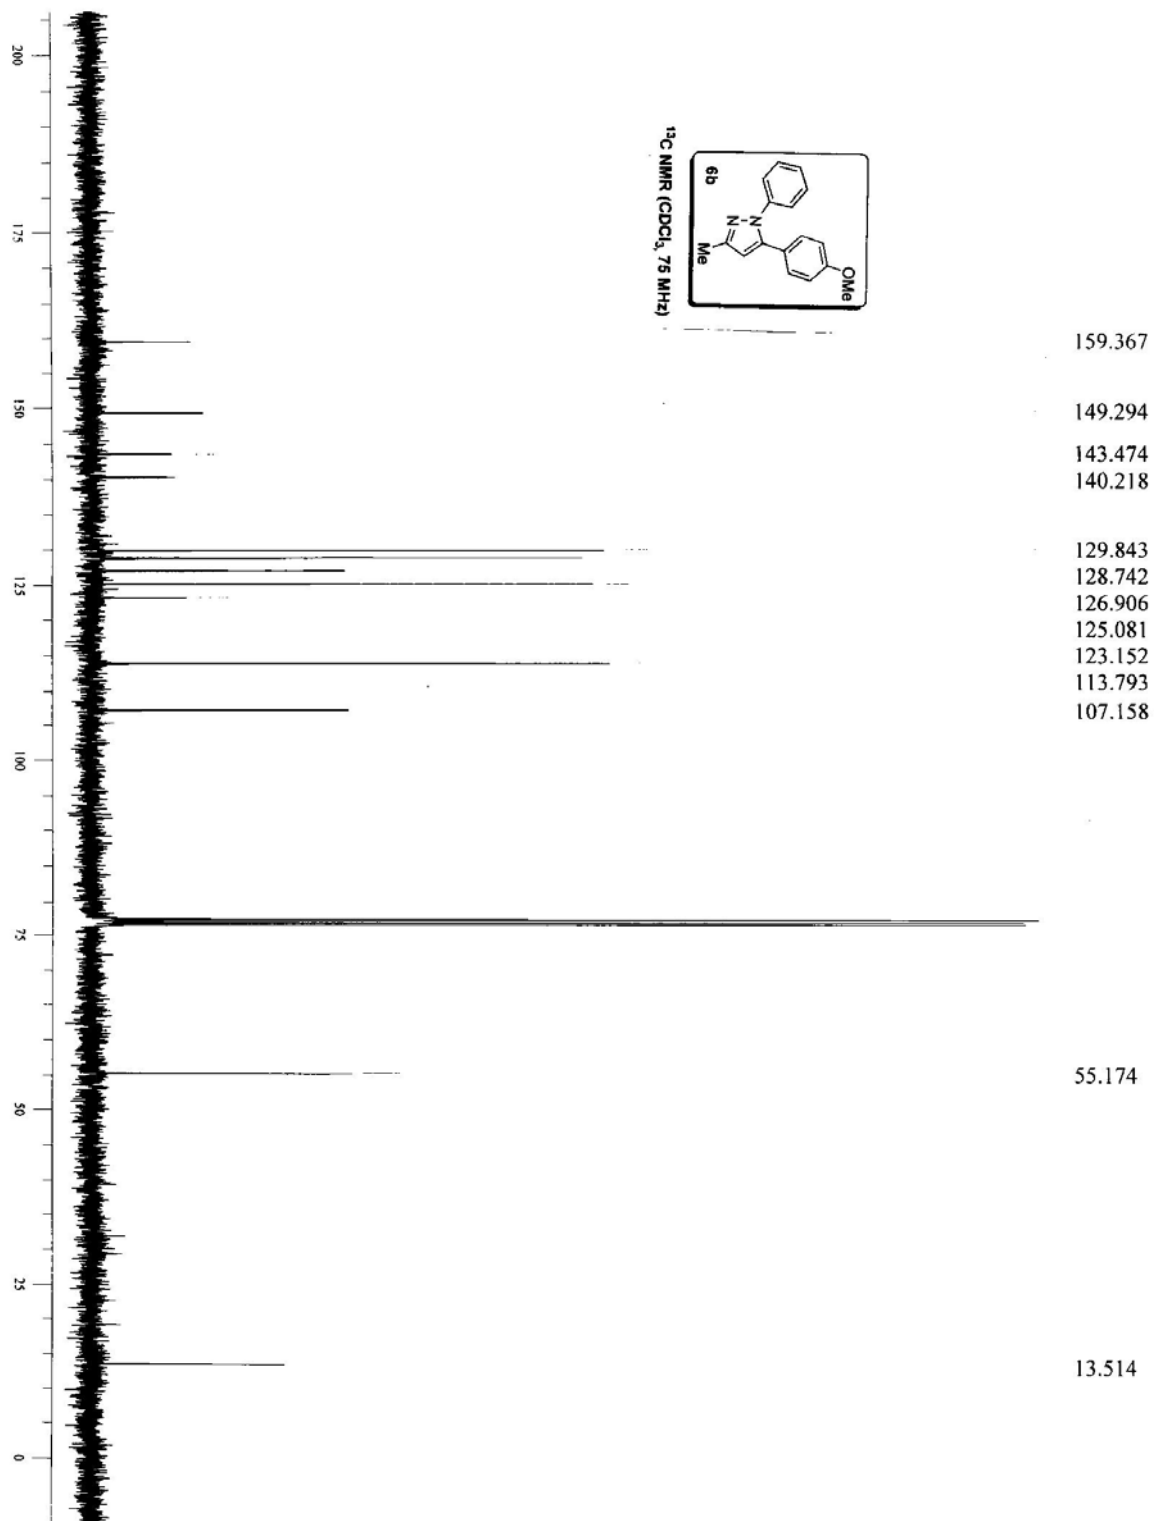

Supplement: c1cc14850h.pdf [file c1cc14850h.pdf]
